# Supplementary material for: A trimeric Rab7 GEF controls NPC1-dependent lysosomal cholesterol export
Source: Nat Commun. 2020 Nov 3;11:5559. doi: 10.1038/s41467-020-19032-0 (PMC7642327; doi:10.1038/s41467-020-19032-0)
Supplement: Supplementary file 3 — Supplementary Data 1 [file 41467_2020_19032_MOESM3_ESM.xlsx]

## Sheet: Summary
	Supplementary Data 1 (van den Boomen et al. Nature Commun. 2020)
	Contains:
	- List of combined genetic screening hits from the primary (genome-wide) and secondary (targeted) CRISPR screens
	- MAGeCK analysis of the genome-wide CRISPR screen
	- MAGeCK analysis of the secondary targeted CRISPR screen
	- raw sgRNA counts from the genome-wide CRISPR screen
	- raw sgRNA counts from the secondary targeted CRISPR screen
	- sgRNA sequences of the 'Bassik' genome-wide CRISPR library
	- sgRNA sequences of the targeted 'top 1000' CRISPR library

## Sheet: List of hits
Gene ID	sgRNA enrichment score
	genome-wide	targeted
NPC1	33.2537	17.0483
EHD1	33.1682	14.2329
VPS45	24.3116	16.8921
LDLR	23.1728	15.5576
GNPTAB	25.8576	10.8634
VAC14	21.7272	14.9592
SREBF1	21.3405	13.3567
RABGEF1	17.8802	8.76652
ANKFY1	19.6404	6.8987
WDR7	13.9119	12.1912
RP11-512M8.5	13.3652	12.5329
COG3	9.77368	15.9822
VPS11	13.4713	10.5985
RAB7A	16.5377	7.00445
VPS16	8.36297	14.8962
ATP6AP1	14.1177	9.08759
VPS53	15.8441	6.60815
VPS33A	10.919	#N/A
C18orf8	16.8675	4.38409
NPC2	14.8932	6.27319
ARF4	11.3614	9.79188
ZFYVE20	12.8305	7.98928
ATP6V1B2	8.98552	11.3907
ATP2A2	7.88406	12.2957
VPS41	14.8492	5.05325
USP8	7.49003	11.9258
ATP6V1H	11.9956	7.03272
PTPN23	7.71139	11.2743
HGS	11.9779	6.90441
VPS18	8.22868	10.4044
INSIG1	12.7047	5.44838
FIG4	11.5283	6.5027
BECN1	10.1219	7.89877
COG7	5.36718	12.5859
VPS52	9.94661	7.69953
VPS39	10.8299	6.71229
VPS8	12.4843	4.45781
C19orf25	8.36204	8.41224
AAGAB	14.9006	1.77609
VPS54	10.7845	5.77096
AP2M1	8.50607	7.97621
RP11-343C2.9	7.5703	8.87041
DNM2	5.85449	10.4461
ATP6AP2	8.55091	7.71142
GALNT11	14.0235	2.09817
ATP6V0E1	8.08789	8.00241
ATP6V1A	6.90939	8.2859
COG4	7.02102	8.05476
CTD-2132N18.3	7.49701	#N/A
PIK3C3	4.90028	10.0468
COPG1	3.14808	10.83
RP11-371E8.4	8.61222	5.3396
ATP6V0D1	6.97257	6.81979
RAB5C	6.79132	#N/A
COPB1	4.78231	8.81118
TMEM251	8.61222	4.01498
HSP90B1	5.2327	6.95916
COG8	2.90212	8.87041
ATP6V1G1	5.7614	5.99619
ARF1	4.9107	6.82696
CHP1	10.9615	0.59346
CCZ1	6.67584	4.61824
FCHO2	10.5505	0.631564
PIK3R4	5.35638	5.63982
ATP6V1F	4.02088	6.90163
CCDC115	2.69171	7.98489
AP2S1	9.52912	1.01232
SLC35A1	10.3885	0.145239
ATP6V1D	3.84503	6.63136
SFPQ	7.7717	2.0287
UVRAG	6.66884	2.87393
NBAS	6.07871	3.41992
PSAP	9.09453	0.357239
FAM160B2	9.05144	0.291911
ATP6C	6.25272	2.94245
TGFBRAP1	7.91332	1.18836
VMA21	2.71849	6.19942
RABEP1	8.16363	0.676583
SLC33A1	8.42886	0.356291
PTAR1	2.48243	6.26956
TMEM199	1.87949	6.73327
NPRL3	7.88101	0.725911
CCZ1B	5.19574	3.31971
EXOC7	5.90101	2.56019
PNOC	7.51897	0.87605
UBR2	7.74499	0.620205
COPB2	2.15608	6.17602
COG5	3.00721	5.20363
BLOC1S2	5.53961	2.50019
RER1	5.99161	2.03685
EXOC5	5.16064	2.68382
NUGGC	6.63816	0.656887
CABLES1	6.39686	0.586064
GNPTG	6.37893	0.280992
EGR3	5.84765	0.38951
NSDHL	5.56657	0.159016
DERL1	5.52783	0.148919
AMDHD2	5.26546	0.3871
FZD3	5.46557	0.00708877
STMN4	5.25142	0.186099
SLC18A1	5.24026	0.171579
ITPKA	5.28523	0.0186254
CABP2	5.13622	0.134629
TRIM35	5.2094	0.0457961
CLU	5.03306	0.0648103
ADAM28	5.02891	0.0207795

## Sheet: Analysis genome-wide screen
Gene ID	pos|score	-log(score)	pos|p-value	pos|fdr	pos|rank	pos|goodsgrna	pos|lfc
NPC1	5.5751e-34	33.2537	2.4071e-07	7.5e-05	1	10	10.141
EHD1	6.7894e-34	33.1682	2.4071e-07	7.5e-05	2	10	9.9805
GNPTAB	1.388e-26	25.8576	2.4071e-07	7.5e-05	3	10	9.1144
VPS45	4.8801e-25	24.3116	2.4071e-07	7.5e-05	4	9	9.1118
LDLR	6.7178e-24	23.1728	2.4071e-07	7.5e-05	5	10	10.191
VAC14	1.8743e-22	21.7272	2.4071e-07	7.5e-05	6	9	6.0237
SREBF1	4.5658e-22	21.3405	2.4071e-07	7.5e-05	7	10	7.374
ANKFY1	2.2888e-20	19.6404	2.4071e-07	7.5e-05	8	8	6.618
RABGEF1	1.3175e-18	17.8802	2.4071e-07	7.5e-05	9	8	7.1105
C18orf8	1.3569e-17	16.8675	2.4071e-07	7.5e-05	10	9	6.1663
RAB7A	2.8992e-17	16.5377	2.4071e-07	7.5e-05	11	9	5.9614
VPS53	1.432e-16	15.8441	2.4071e-07	7.5e-05	12	8	6.224
AAGAB	1.2571e-15	14.9006	2.4071e-07	7.5e-05	13	8	5.4232
NPC2	1.2788e-15	14.8932	2.4071e-07	7.5e-05	14	6	7.5881
VPS41	1.4151e-15	14.8492	2.4071e-07	7.5e-05	15	7	5.3024
ATP6AP1	7.6255e-15	14.1177	2.4071e-07	7.5e-05	16	7	6.594
GALNT11	9.473e-15	14.0235	2.4071e-07	7.5e-05	17	9	3.9036
WDR7	1.2249e-14	13.9119	2.4071e-07	7.5e-05	18	8	5.2876
VPS11	3.378e-14	13.4713	2.4071e-07	7.5e-05	19	9	4.9922
RP11-512M8.5	4.313e-14	13.3652	2.4071e-07	7.5e-05	20	8	4.6898
ZFYVE20	1.4773e-13	12.8305	2.4071e-07	7.5e-05	21	8	5.1265
INSIG1	1.9738e-13	12.7047	2.4071e-07	7.5e-05	22	8	4.6498
VPS8	3.2788e-13	12.4843	2.4071e-07	7.5e-05	23	7	5.8256
ATP6V1H	1.0101e-12	11.9956	2.4071e-07	7.5e-05	24	7	5.5045
HGS	1.0523e-12	11.9779	2.4071e-07	7.5e-05	25	8	5.1093
FIG4	2.9631e-12	11.5283	2.4071e-07	7.5e-05	26	7	4.9163
ARF4	4.3513e-12	11.3614	2.4071e-07	7.5e-05	27	7	4.8353
CHP1	1.0927e-11	10.9615	2.4071e-07	7.5e-05	28	7	4.6188
VPS33A	1.2049e-11	10.919	2.4071e-07	7.5e-05	29	7	4.368
VPS39	1.4793e-11	10.8299	2.4071e-07	7.5e-05	30	5	5.9606
VPS54	1.6426e-11	10.7845	2.4071e-07	7.5e-05	31	8	4.3806
FCHO2	2.815e-11	10.5505	2.4071e-07	7.5e-05	32	8	2.8484
SLC35A1	4.0877e-11	10.3885	2.4071e-07	7.5e-05	33	7	3.2073
BECN1	7.553e-11	10.1219	2.4071e-07	7.5e-05	34	7	4.2594
VPS52	1.1308e-10	9.94661	2.4071e-07	7.5e-05	35	7	4.3601
COG3	1.6839e-10	9.77368	2.4071e-07	7.5e-05	36	8	3.6261
AP2S1	2.9572e-10	9.52912	2.4071e-07	7.5e-05	37	7	3.4175
PSAP	8.0439e-10	9.09453	2.4071e-07	7.5e-05	38	6	3.4077
FAM160B2	8.8831e-10	9.05144	2.4071e-07	7.5e-05	39	6	3.1735
ATP6V1B2	1.0339e-09	8.98552	2.4071e-07	7.5e-05	40	7	3.3226
RP11-371E8.4	2.4422e-09	8.61222	2.4071e-07	7.5e-05	42	6	2.997
TMEM251	2.4422e-09	8.61222	2.4071e-07	7.5e-05	41	5	0.60072
ATP6AP2	2.8125e-09	8.55091	2.4071e-07	7.5e-05	43	6	2.9644
AP2M1	3.1184e-09	8.50607	2.4071e-07	7.5e-05	44	6	3.014
SLC33A1	3.7251e-09	8.42886	2.4071e-07	7.5e-05	45	6	3.0484
VPS16	4.3354e-09	8.36297	2.4071e-07	7.5e-05	46	6	4.0185
C19orf25	4.3447e-09	8.36204	2.4071e-07	7.5e-05	47	7	2.4149
VPS18	5.9063e-09	8.22868	2.4071e-07	7.5e-05	48	6	2.9195
RABEP1	6.8608e-09	8.16363	2.4071e-07	7.5e-05	49	6	3.2211
ATP6V0E1	8.1679e-09	8.08789	2.4071e-07	7.5e-05	50	4	-4.063
TGFBRAP1	1.2209e-08	7.91332	2.4071e-07	7.5e-05	51	6	2.6916
ATP2A2	1.306e-08	7.88406	2.4071e-07	7.5e-05	52	5	1.4554
NPRL3	1.3152e-08	7.88101	2.4071e-07	7.5e-05	53	5	1.7719
SFPQ	1.6916e-08	7.7717	2.4071e-07	7.5e-05	54	7	1.727
UBR2	1.7989e-08	7.74499	2.4071e-07	7.5e-05	55	6	2.6006
PTPN23	1.9436e-08	7.71139	2.4071e-07	7.5e-05	56	6	2.7276
RP11-343C2.9	2.6897e-08	7.5703	2.4071e-07	7.5e-05	57	6	2.5079
PNOC	3.0271e-08	7.51897	2.4071e-07	7.5e-05	58	6	2.3137
CTD-2132N18.3	3.1841e-08	7.49701	2.4071e-07	7.5e-05	59	6	2.5287
USP8	3.2357e-08	7.49003	2.4071e-07	7.5e-05	60	7	1.5977
COG4	9.5276e-08	7.02102	2.4071e-07	7.5e-05	61	5	0.89748
ATP6V0D1	1.0652e-07	6.97257	2.4071e-07	7.5e-05	62	6	2.0977
ATP6V1A	1.232e-07	6.90939	2.4071e-07	7.5e-05	63	4	0.13858
RAB5C	1.6169e-07	6.79132	2.4071e-07	7.5e-05	64	5	0.60829
CCZ1	2.1094e-07	6.67584	2.4071e-07	7.5e-05	65	5	1.7824
UVRAG	2.1437e-07	6.66884	4.8143e-07	0.000148	66	3	-5.306
NUGGC	2.3006e-07	6.63816	7.2214e-07	0.000203	67	6	2.0908
CABLES1	4.01e-07	6.39686	7.2214e-07	0.000203	68	6	1.7393
GNPTG	4.179e-07	6.37893	2.4071e-07	7.5e-05	69	5	2.4334
ATP6C	5.5883e-07	6.25272	7.2214e-07	0.000203	70	6	1.4654
NBAS	8.3423e-07	6.07871	7.2214e-07	0.000203	71	5	-2.4974
RER1	1.0195e-06	5.99161	7.2214e-07	0.000203	72	5	1.4069
EXOC7	1.256e-06	5.90101	1.2036e-06	0.000326	73	5	-2.1831
DNM2	1.398e-06	5.85449	1.2036e-06	0.000326	74	6	1.2792
EGR3	1.4202e-06	5.84765	1.2036e-06	0.000326	75	6	1.1463
ATP6V1G1	1.7322e-06	5.7614	7.2214e-07	0.000203	76	5	1.942
NSDHL	2.7129e-06	5.56657	2.1664e-06	0.000557	77	5	-3.4819
BLOC1S2	2.8866e-06	5.53961	2.1664e-06	0.000557	78	5	-2.4495
DERL1	2.966e-06	5.52783	2.1664e-06	0.000557	79	5	-1.2252
FZD3	3.4232e-06	5.46557	2.1664e-06	0.000557	80	5	-2.3989
COG7	4.2936e-06	5.36718	3.6107e-06	0.000906	81	5	0.49453
PIK3R4	4.4017e-06	5.35638	3.6107e-06	0.000906	82	5	0.56464
ITPKA	5.1853e-06	5.28523	4.0921e-06	0.001014	83	5	1.4936
AMDHD2	5.4268e-06	5.26546	6.4992e-06	0.001591	84	5	1.2813
STMN4	5.605e-06	5.25142	6.9807e-06	0.00165	85	5	-1.9025
SLC18A1	5.7509e-06	5.24026	6.9807e-06	0.00165	86	5	1.2507
HSP90B1	5.852e-06	5.2327	6.9807e-06	0.00165	87	4	-4.0126
TRIM35	6.1745e-06	5.2094	7.4621e-06	0.001744	88	5	0.56219
CCZ1B	6.3718e-06	5.19574	7.9435e-06	0.001836	89	5	1.2196
EXOC5	6.9082e-06	5.16064	8.9064e-06	0.002035	90	5	-1.5011
CABP2	7.3077e-06	5.13622	9.3878e-06	0.002122	91	5	-2.9962
CLU	9.267e-06	5.03306	1.1313e-05	0.002475	92	4	-0.19932
ADAM28	9.356e-06	5.02891	1.1313e-05	0.002475	93	5	-2.5011
PBK	1.0236e-05	4.98987	1.1795e-05	0.002553	94	5	1.124
ARF1	1.2283e-05	4.9107	1.5165e-05	0.003249	95	5	0.60713
PIK3C3	1.2581e-05	4.90028	1.1313e-05	0.002475	96	5	1.1274
EXOC8	1.2926e-05	4.88854	1.5646e-05	0.003317	97	5	0.9682
COPB1	1.6508e-05	4.78231	2.0942e-05	0.004307	98	3	-7.0567
KANSL1	1.6555e-05	4.78107	2.0942e-05	0.004307	99	4	-6.4174
C1GALT1C1	1.6698e-05	4.77734	2.0942e-05	0.004307	100	4	-5.0473
YIPF5	1.8404e-05	4.73509	2.4793e-05	0.004999	101	5	-2.2656
LGI3	1.894e-05	4.72262	2.7201e-05	0.005431	102	5	-2.3045
PIWIL2	2.1206e-05	4.67354	2.1423e-05	0.004362	103	4	-5.319
VPS51	2.3143e-05	4.63558	3.2015e-05	0.006211	104	4	-3.1702
FAM89B	2.3519e-05	4.62858	3.2015e-05	0.006211	105	1	-7.2082
BMP1	2.884e-05	4.54	3.9958e-05	0.00768	106	5	0.07362
NAPG	3.0062e-05	4.52198	4.068e-05	0.007747	107	5	-2.5858
FBXO16	3.1247e-05	4.50519	3.0089e-05	0.00595	108	4	-5.2018
ATP2B2	3.1404e-05	4.50302	4.2606e-05	0.008039	109	4	-5.7107
TNFRSF10A	3.2645e-05	4.48618	4.405e-05	0.008236	110	5	-2.7869
KCTD5	3.4842e-05	4.4579	4.8383e-05	0.008964	111	5	0.64946
OTUD5	4.7866e-05	4.31997	7.101e-05	0.013039	112	3	-5.5986
SLC39A14	5.1062e-05	4.2919	7.5343e-05	0.013712	113	3	-5.8371
DPYSL2	5.3845e-05	4.26885	7.8713e-05	0.0142	114	4	-4.3292
PMP22	5.9177e-05	4.22785	8.2564e-05	0.014765	115	4	-6.6558
DOK2	6.1169e-05	4.21347	8.4009e-05	0.014894	116	3	-6.0323
DUSP4	6.4206e-05	4.19242	8.7379e-05	0.015359	117	4	-1.0767
HMGCR	7.0556e-05	4.15147	9.5081e-05	0.016516	118	3	-5.7708
MESDC2	7.3972e-05	4.13093	9.5563e-05	0.016516	119	3	-6.9818
RBM10	7.5743e-05	4.12066	9.6526e-05	0.016543	120	4	-5.4634
EME2	9.1561e-05	4.03829	0.00011289	0.019031	121	3	-7.4855
ATP6V0C	9.3553e-05	4.02894	0.00010664	0.018125	122	2	-5.794
ATP6V1F	9.5305e-05	4.02088	0.0001153	0.019279	123	4	-4.8553
WDR91	0.00010564	3.97617	0.00012637	0.02096	124	4	-6.6336
C8orf58	0.00010722	3.96972	0.00012926	0.021177	125	4	-6.7246
CCDC25	0.0001096	3.96019	0.00012974	0.021177	126	4	-6.6956
CHRNA2	0.00013635	3.86534	0.00015189	0.024597	127	4	-6.1088
EMC6	0.00014218	3.84716	0.00015574	0.024983	128	4	-3.4751
ATP6V1D	0.00014288	3.84503	0.00016826	0.025824	129	3	-5.5281
FDFT1	0.00014698	3.83274	0.0001567	0.024983	130	4	-3.889
NAA60	0.00014837	3.82865	0.00024095	0.034898	131	5	-6.4834
PRM1	0.0001522	3.81759	0.00015959	0.025055	132	4	-6.7319
OTOR	0.00015265	3.8163	0.00015959	0.025055	133	4	-6.1393
DNAJB13	0.00015933	3.7977	0.00016681	0.025795	134	4	-5.9569
LY6K	0.00016002	3.79583	0.00016681	0.025795	135	3	-6.1226
GOSR1	0.0001648	3.78304	0.00017355	0.026439	136	3	-5.8487
KCTD9	0.00016926	3.77145	0.00018366	0.027774	137	3	-6.4337
SMOC2	0.00017526	3.75632	0.00018752	0.028149	138	3	-7.0244
FBXW7	0.00019544	3.70899	0.00020966	0.031246	139	3	-6.1573
ELTD1	0.00021028	3.6772	0.00022507	0.0333	140	3	-4.9587
DNAJC13	0.00022046	3.65667	0.00023999	0.034898	141	4	-2.5806
TCL1A	0.0002224	3.65287	0.00024047	0.034898	142	3	-7.1335
NRTN	0.00022906	3.64005	0.0002578	0.037077	143	3	-6.739
SLC39A7	0.00028887	3.5393	0.0003305	0.047202	144	4	-2.3104
MFSD1	0.0002972	3.52695	0.00040175	0.055827	145	4	-6.1508
ATP6V1C1	0.00030571	3.51469	0.00036035	0.050827	146	4	-5.5635
WNT8B	0.00030776	3.51179	0.00036083	0.050827	147	3	-6.5358
PRSS27	0.00031527	3.50132	0.00037142	0.051963	148	4	-5.855
EMC3	0.00035018	3.45571	0.00043304	0.059771	149	2	-6.8525
TNPO2	0.00036323	3.43982	0.00044989	0.061275	150	4	-3.0571
HCN4	0.00036348	3.43952	0.00044989	0.061275	151	4	-6.0769
CCAR2	0.00038693	3.41237	0.00048263	0.065301	152	4	-3.1976
SPG11	0.00039198	3.40674	0.00048792	0.065586	153	4	-6.7505
NKX3-1	0.0003964	3.40187	0.00059962	0.076594	154	3	-6.3928
NYAP1	0.00039976	3.3982	0.00050959	0.067244	155	1	-7.8136
COG1	0.00040075	3.39713	0.00051007	0.067244	156	3	-7.2796
PICALM	0.00040111	3.39674	0.00051007	0.067244	157	3	-7.1097
C15orf57	0.00040661	3.39082	0.00061358	0.077608	158	4	-5.7107
ZBTB42	0.00041023	3.38697	0.00052836	0.069212	159	4	-4.4509
REEP4	0.00042139	3.37532	0.00053559	0.069714	160	4	-3.2768
CORO2A	0.00042616	3.37043	0.00054425	0.070397	161	3	-6.0243
IL22RA2	0.00043757	3.35895	0.00055388	0.071194	162	2	-6.5607
TEX15	0.00046516	3.3324	0.00061887	0.077608	163	4	-6.6932
RPS17	0.00047029	3.32763	0.00063043	0.078104	164	2	-7.0865
RPS17L	0.00047029	3.32763	0.00063043	0.078104	165	2	-7.0865
NXPE4	0.00047885	3.3198	0.00064102	0.078941	166	4	-2.3366
C10orf32	0.00051167	3.29101	0.00076234	0.091685	168	3	-5.8208
C10orf32-ASMT	0.00051167	3.29101	0.00076234	0.091685	167	3	-5.8208
SFTPC	0.00051411	3.28894	0.00072479	0.088726	169	4	-7.8833
KCTD7	0.00053379	3.27263	0.00074597	0.090779	170	2	-6.1575
MEIS2	0.00055191	3.25813	0.00079989	0.09509	171	4	-5.7667
COG2	0.00056133	3.25078	0.00061839	0.077608	172	3	-3.8949
CLCN7	0.00057089	3.24345	0.00082251	0.097217	173	3	-5.8664
PTK2B	0.00059485	3.22559	0.00086969	0.102207	174	4	-2.4581
BTG4	0.00061293	3.21259	0.00091447	0.106858	175	4	-7.4252
SPNS1	0.00062846	3.20172	0.00096068	0.110377	176	3	-3.6887
PIKFYVE	0.00063623	3.19639	0.00097946	0.11129	177	3	-6.3847
MEF2BNB	0.00063641	3.19626	0.00097946	0.11129	178	4	-4.5281
UBE2B	0.0006508	3.18655	0.00099246	0.111628	179	4	-6.3906
KLRC4-KLRK1	0.00065159	3.18603	0.00099583	0.111628	180	4	-5.3175
DLAT	0.00068083	3.16696	0.0010372	0.115306	181	4	-2.9034
RHOT2	0.00068706	3.16301	0.001055	0.116258	182	4	-6.2653
COPG1	0.00071108	3.14808	0.0010627	0.116258	183	3	-2.9431
HTT	0.00072151	3.14176	0.0010627	0.116258	184	3	-6.8883
SMIM11	0.00074157	3.12985	0.0010825	0.117223	185	2	-6.3746
TRAF2	0.00076528	3.11618	0.001083	0.117223	186	3	-6.5013
MMP1	0.00077402	3.11125	0.0010926	0.117646	187	3	-3.8368
SPINK1	0.00078685	3.10411	0.00094383	0.10905	188	3	-2.886
MASP2	0.00082288	3.08466	0.0011345	0.121519	189	1	-7.0426
AQR	0.00083179	3.07999	0.001147	0.122223	190	3	-5.5772
ESCO2	0.00083685	3.07735	0.00099872	0.111628	191	3	-7.4108
LINC00632	0.00084222	3.07457	0.0011557	0.122512	192	2	-7.632
SEC11A	0.00085612	3.06747	0.0011691	0.123305	193	3	-7.1608
PHYHIP	0.00095047	3.02206	0.0012505	0.130598	194	3	-6.8533
C6orf195	0.00096242	3.01664	0.001251	0.130598	195	2	-6.326
TNFRSF10C	0.00097951	3.00899	0.0012784	0.132788	196	3	-7.1
COG5	0.00098354	3.00721	0.0012938	0.133296	197	2	-6.5054
AL162424.1	0.00098784	3.00531	0.00078978	0.094434	198	2	-0.27577
LSS	0.0010146	2.99371	0.0013092	0.133296	199	3	-7.3797
RCBTB1	0.0010363	2.98451	0.0013323	0.134319	200	2	-6.113
RPS15A	0.0010619	2.97392	0.0013088	0.133296	201	2	-5.4617
KIF21B	0.001069	2.97102	0.0013256	0.134297	202	2	-7.0475
OR10G7	0.0010722	2.96972	0.001355	0.134668	203	2	-6.7948
SOX14	0.0010768	2.96786	0.0013555	0.134668	204	3	-6.1077
ZNF540	0.0010781	2.96734	0.0013555	0.134668	205	3	-6.588
KANSL3	0.0011283	2.94758	0.0013964	0.138066	206	3	-6.4938
ATP6V1E1	0.0011689	2.93222	0.0014151	0.138637	207	2	-5.7313
EMC2	0.0011731	2.93066	0.0014156	0.138637	208	3	-6.2195
COG8	0.0012528	2.90212	0.0015909	0.155061	209	3	-7.3257
NUDT18	0.0012742	2.89476	0.0016087	0.156057	210	3	-5.8618
OR51L1	0.0012928	2.88847	0.0016496	0.158532	211	1	-7.4741
CT55	0.0013328	2.87524	0.0016173	0.156161	212	2	-7.529
PSMG4	0.0013378	2.87361	0.0016953	0.16151	213	3	-6.1517
PIAS1	0.0013901	2.85695	0.0017286	0.163823	214	2	-6.3468
KPNB1	0.0014042	2.85257	0.0016963	0.16151	215	2	-5.8855
PCDHGA1	0.0015126	2.82028	0.0019192	0.181056	216	3	-7.4368
TEAD3	0.0015277	2.81596	0.0019553	0.181959	217	1	-6.71
DDI1	0.0015304	2.8152	0.0019649	0.182031	218	2	-6.6976
TMPRSS11F	0.0015472	2.81045	0.0019784	0.182458	219	2	-7.1867
ATP11C	0.0015747	2.8028	0.0020449	0.187743	220	1	-7.5042
RABIF	0.0015931	2.79776	0.0019481	0.181959	221	3	-6.3838
RWDD4	0.0016036	2.7949	0.0019481	0.181959	222	2	-6.8923
ARL4A	0.0016217	2.79003	0.0021382	0.19124	223	1	-6.997
HR	0.001625	2.78915	0.0021382	0.19124	224	2	-6.4538
GNRH1	0.0016297	2.78789	0.0021382	0.19124	225	3	-6.7682
IGKV1-37	0.0016514	2.78215	0.0021387	0.19124	227	3	-6.3245
IGKV1D-37	0.0016514	2.78215	0.0021387	0.19124	226	3	-6.3245
ABCC2	0.0016554	2.7811	0.0021387	0.19124	228	3	-7.1087
R3HCC1	0.0016672	2.77801	0.0021638	0.192641	229	3	-3.0015
CDRT1	0.0016734	2.7764	0.0027506	0.224989	230	4	-7.6284
SDC3	0.0017156	2.76558	0.0022283	0.19585	231	3	-6.4893
FGL1	0.0017199	2.7645	0.0022283	0.19585	232	2	-6.082
SPSB1	0.0017377	2.76003	0.0022288	0.19585	233	2	-7.1758
OR13C8	0.001771	2.75178	0.0022379	0.19585	234	3	-6.3502
RP11-190A12.7	0.0018226	2.73931	0.002286	0.198477	235	3	-6.0183
ANKH	0.0018502	2.73278	0.0022969	0.198477	236	3	-8.146
NPIPB7	0.0018502	2.73278	0.0022969	0.198477	237	3	-6.1857
VMA21	0.0019121	2.71849	0.0023621	0.20326	238	2	-7.3884
MYH11	0.0019523	2.70945	0.0024536	0.20942	239	3	-7.3762
CMAS	0.0019642	2.70681	0.0024541	0.20942	240	3	-6.6924
IGLV11-55	0.0020118	2.69642	0.0025219	0.21174	241	2	-7.0961
METTL2B	0.0020202	2.69461	0.0025219	0.21174	242	3	-7.6346
CCDC115	0.0020337	2.69171	0.0025224	0.21174	243	3	-6.7279
AP2A1	0.0020741	2.68317	0.002508	0.21174	244	3	-0.60304
MBLAC2	0.0020913	2.67958	0.0026341	0.217563	245	1	-8.1564
SPIN1	0.0021224	2.67317	0.0027116	0.223069	246	3	-6.8698
DMXL1	0.0021444	2.66869	0.0025783	0.214675	247	3	-7.3247
DCUN1D1	0.0021585	2.66585	0.0027699	0.224989	248	3	-6.7077
KRTAP5-5	0.0021754	2.66246	0.0027978	0.224989	249	3	-6.6106
KCNC2	0.0021988	2.65781	0.0028329	0.224989	250	3	-3.8194
ZNF597	0.0021993	2.65772	0.0025715	0.214675	251	1	-6.3622
MTMR6	0.0022031	2.65697	0.0028329	0.224989	252	3	-6.2002
BNC1	0.0022073	2.65614	0.0028334	0.224989	253	3	-7.121
PAEP	0.0022115	2.65531	0.0026028	0.215846	254	3	-6.1081
AL590483.1	0.0022244	2.65279	0.0028334	0.224989	255	2	-6.1105
SAMD4A	0.0022321	2.65129	0.0028676	0.225134	256	1	-6.1118
RP11-794P6.2	0.0022342	2.65088	0.0028676	0.225134	257	3	-6.5932
ARID1A	0.0022819	2.6417	0.0028681	0.225134	258	3	-6.1306
TRAJ14	0.0023543	2.62814	0.00093806	0.108995	259	1	6.1231
NT5M	0.0023769	2.62399	0.0030246	0.230664	260	3	-6.8695
JTB	0.0023787	2.62366	0.0030246	0.230664	261	2	-6.2851
POF1B	0.0023803	2.62337	0.0030246	0.230664	262	3	-7.4315
RP11-362K2.2	0.0023881	2.62195	0.003025	0.230664	263	3	-7.6303
AC137932.1	0.0023935	2.62097	0.003025	0.230664	264	2	-6.6453
SLC15A3	0.0024173	2.61667	0.0030395	0.230664	265	2	-8.2612
NTRK3	0.0024208	2.61604	0.0030395	0.230664	266	3	-7.0512
STC1	0.0024364	2.61325	0.0027732	0.224989	267	2	-5.794
ASPN	0.0024584	2.60935	0.0031165	0.23564	268	3	-7.8735
C17orf107	0.0024671	2.60781	0.0028243	0.224989	269	3	-5.3742
SLC25A37	0.0025114	2.60008	0.003247	0.243713	270	3	-6.1289
TBC1D20	0.0025349	2.59604	0.0032595	0.243762	271	2	-5.9666
LOXL2	0.0025529	2.59297	0.0028792	0.225144	272	2	-7.6863
RAB2A	0.0025698	2.5901	0.0033582	0.247857	273	3	-5.5061
COG6	0.0025898	2.58673	0.0033765	0.247857	274	3	-6.8789
HPS6	0.0026076	2.58376	0.0033765	0.247857	275	2	-7.1057
MUT	0.0026171	2.58218	0.003377	0.247857	276	3	-7.2057
ENTPD4	0.0026413	2.57818	0.0029456	0.229467	277	2	-7.2529
FAM170A	0.0026487	2.57697	0.0033936	0.247857	278	3	-5.9384
MAST2	0.0026487	2.57697	0.0033936	0.247857	279	3	-6.3438
MTMR4	0.0026645	2.57438	0.0034102	0.247857	280	2	-6.7804
TMEM87B	0.0026833	2.57133	0.0034107	0.247857	281	2	-6.0513
SNTB1	0.0028305	2.54814	0.0034756	0.249965	282	3	-6.5237
ADAM7	0.0028389	2.54685	0.0032277	0.243155	283	3	-5.1813
SPG20	0.0028859	2.53972	0.0040413	0.283665	284	2	-6.2525
C22orf43	0.002889	2.53925	0.0034761	0.249965	285	3	-6.3395
DMTN	0.0028997	2.53765	0.0034761	0.249965	286	3	-0.48241
TVP23C	0.0029437	2.53111	0.0035031	0.251026	287	3	-7.3176
TNRC6B	0.0029757	2.52641	0.0035156	0.251049	288	2	-7.08
CHRM2	0.002983	2.52535	0.003532	0.251345	289	1	-7.3431
EPT1	0.0029988	2.52305	0.0035483	0.251639	290	2	-7.1337
ATP1B2	0.0030271	2.51897	0.0035613	0.251693	291	3	-7.8933
NUTM2G	0.0030385	2.51734	0.0035965	0.253306	292	2	-7.5845
LBH	0.0031496	2.50174	0.0043364	0.303344	293	2	-6.4792
TRAJ5	0.003154	2.50114	0.0013054	0.133296	294	1	5.6235
MRGPRD	0.003186	2.49675	0.0045314	0.314841	295	3	-5.1198
PRDX2	0.003213	2.49309	0.0045507	0.315115	296	3	-6.6035
PTAR1	0.0032928	2.48243	0.0046195	0.317775	297	2	-6.9615
NNAT	0.0033136	2.4797	0.00462	0.317775	298	2	-7.5393
SP8	0.0033658	2.47291	0.0046884	0.321403	299	2	-6.2681
DIAPH2	0.0034289	2.46485	0.0047842	0.326881	300	2	-7.5994
VWC2L	0.0034819	2.45818	0.0048848	0.330547	301	2	-7.4284
PPP1R3C	0.0034855	2.45773	0.0048848	0.330547	302	2	-7.2259
GMEB2	0.0035389	2.45113	0.0049021	0.330547	303	2	-6.989
CYP3A4	0.0035394	2.45107	0.0049021	0.330547	304	3	-7.0096
KRT7	0.0035927	2.44458	0.0049507	0.330574	305	1	-7.3947
UBE2E3	0.0035972	2.44404	0.0049507	0.330574	306	3	-7.5972
CELSR2	0.0036071	2.44284	0.0049507	0.330574	307	2	-6.6993
NPIPB9	0.0036512	2.43756	0.0049719	0.330914	308	3	-5.4085
CEP85L	0.0036596	2.43657	0.0049926	0.33122	309	2	-6.8845
RP11-536G4.1	0.0036771	2.43449	0.004503	0.313929	310	2	-6.6666
ZNF397	0.0037333	2.42791	0.0050109	0.331365	311	1	-6.9383
DCBLD1	0.0037712	2.42352	0.0050961	0.334846	312	2	-7.1373
TNFRSF10D	0.0037726	2.42336	0.0050961	0.334846	313	3	-6.1755
ZNF812	0.003789	2.42148	0.0051443	0.336933	314	3	-6.589
EHD4	0.0038271	2.41713	0.0051698	0.337529	315	3	-7.0015
TMEM55B	0.0038478	2.41479	0.005189	0.337715	316	3	-6.4593
C12orf45	0.0038826	2.41088	0.005228	0.33779	317	2	-7.0687
PEBP4	0.0039087	2.40797	0.0052718	0.33779	318	3	-7.5807
BCKDK	0.0039102	2.4078	0.0052718	0.33779	319	3	-7.0864
MOS	0.0039148	2.40729	0.0052718	0.33779	320	3	-7.3183
CTD-2583A14.9	0.0039578	2.40255	0.0053051	0.338641	321	3	-6.0414
C5orf63	0.0039652	2.40173	0.0052723	0.33779	322	2	-5.912
ZMYM4	0.0040127	2.39656	0.0053185	0.338641	323	3	-5.4866
TRPM4	0.0040296	2.39474	0.0053628	0.340408	324	2	-5.4426
FAM71B	0.0040521	2.39232	0.0054991	0.344829	325	2	-7.402
GPR17	0.0040614	2.39132	0.0053903	0.341097	326	1	-7.3627
CHMP7	0.0040715	2.39025	0.0054996	0.344829	327	3	0.40787
UBAP1	0.0040983	2.3874	0.0054832	0.344829	328	3	-5.5837
ANKRD24	0.0041438	2.3826	0.0055674	0.347	329	3	-6.5595
XRCC6BP1	0.0041552	2.38141	0.0055679	0.347	330	2	-7.6358
GUCA1B	0.0041613	2.38077	0.005593	0.347507	331	3	-5.6846
UBR5	0.0041883	2.37796	0.0056281	0.348637	332	3	-7.7167
TPSAB1	0.0042107	2.37565	0.0056955	0.351753	333	3	-6.5832
DOCK8	0.0042694	2.36963	0.0057323	0.352608	334	3	-6.8013
NACA	0.0043156	2.36496	0.0057436	0.352608	335	2	-6.7569
TRIM6	0.0043223	2.36429	0.0059391	0.359246	336	3	-7.0131
PAX2	0.0043732	2.3592	0.0060339	0.362764	337	1	-6.9779
CAMK2B	0.0043787	2.35865	0.0058284	0.356745	338	2	-6.705
IQCA1	0.0043895	2.35758	0.0058529	0.357185	339	1	-6.8655
CLDN6	0.0044221	2.35437	0.0058934	0.35756	340	3	-6.7897
NEK1	0.0044363	2.35298	0.0058938	0.35756	341	1	-7.0869
REXO4	0.0045061	2.3462	0.0060041	0.362112	342	2	-6.1133
NEFM	0.0045583	2.3412	0.0060855	0.362764	343	3	-6.4843
TCERG1	0.0045722	2.33987	0.0060855	0.362764	344	3	-5.9995
MIXL1	0.0045769	2.33943	0.0060855	0.362764	345	1	-7.6448
PHF23	0.0046096	2.33634	0.0071037	0.413864	346	3	-6.064
TNFRSF12A	0.0046594	2.33167	0.0071951	0.418009	347	2	-6.8279
SMIM22	0.0046931	2.32854	0.0072192	0.418226	348	3	-6.4016
NPIPB8	0.0047057	2.32738	0.0062621	0.370408	349	3	-5.4243
PIGP	0.0047057	2.32738	0.0062621	0.370408	350	3	-6.4179
SGMS1	0.0047209	2.32598	0.0062857	0.370408	351	2	-6.4007
PLAG1	0.004725	2.3256	0.0062857	0.370408	352	2	-7.3522
TRBV27	0.0047869	2.31995	0.0074084	0.424405	353	3	-7.0247
BMP3	0.0048521	2.31407	0.006396	0.375827	354	3	-5.3243
PDLIM2	0.0049029	2.30955	0.0064773	0.378446	355	3	-6.7638
SEMA4B	0.0049047	2.30939	0.0064773	0.378446	356	1	-6.5205
CDKN2A	0.0049559	2.30488	0.0073497	0.424405	357	3	-7.626
FAM192A	0.005016	2.29964	0.007379	0.424405	358	2	-6.3783
COL7A1	0.0050452	2.29712	0.0074002	0.424405	359	1	-7.6915
TRIP11	0.005092	2.29311	0.0075085	0.425623	360	2	-7.3705
TGM6	0.0050964	2.29274	0.0075085	0.425623	361	2	-7.4913
PDE8B	0.0051049	2.29201	0.0075336	0.425623	362	2	-7.2733
UBA3	0.0051124	2.29138	0.0075341	0.425623	363	3	-5.9046
AC131971.1	0.0051241	2.29038	0.0076082	0.425623	364	3	-8.2512
PAPOLG	0.0051262	2.2902	0.0076087	0.425623	365	2	-6.8409
NPIPA7	0.0051385	2.28916	0.0080299	0.430242	366	4	-6.3046
OTOA	0.0051427	2.28881	0.0079813	0.430242	367	3	-6.5042
NSD1	0.0051604	2.28732	0.0076371	0.425623	368	3	-7.3884
SLC24A3	0.0051857	2.28519	0.0076872	0.425623	369	1	-7.0746
KISS1R	0.005195	2.28441	0.0076876	0.425623	370	3	-7.121
NR2E1	0.0051986	2.28411	0.0077151	0.425623	371	3	-6.5833
F11	0.0052117	2.28302	0.0077396	0.425623	372	2	-7.2618
RAB27A	0.0052132	2.2829	0.0077396	0.425623	373	3	-6.9179
AC007952.5	0.0052251	2.28191	0.0077401	0.425623	374	3	-6.1314
NACC1	0.0052325	2.28129	0.0077401	0.425623	375	1	-6.7739
TRPC1	0.0052418	2.28052	0.0078104	0.428343	376	2	-6.9572
ZNF512	0.0052535	2.27955	0.0078869	0.430242	377	3	-7.024
HSD17B2	0.0052633	2.27874	0.0078869	0.430242	378	2	-7.339
RP11-162A12.2	0.005278	2.27753	0.0083696	0.439041	379	3	-5.356
ABCA3	0.0052996	2.27576	0.0079336	0.430242	380	3	-6.495
BAK1	0.0053261	2.27359	0.0079779	0.430242	381	2	-6.734
C2CD5	0.0053329	2.27304	0.0079784	0.430242	382	3	-8.0763
NFATC2	0.0053673	2.27024	0.0080073	0.430242	383	2	-6.5658
AP3D1	0.0053729	2.26979	0.0080333	0.430242	384	1	-6.8242
BNIP3L	0.0054223	2.26582	0.0081503	0.433149	385	3	-6.9714
EXOC2	0.0054354	2.26477	0.0081503	0.433149	386	3	-6.8756
CLYBL	0.0054429	2.26417	0.0081508	0.433149	387	3	-7.4903
KIAA1644	0.005473	2.26177	0.0082297	0.436218	388	3	-7.0329
TMPRSS5	0.0054786	2.26133	0.0082726	0.437362	389	3	-7.5028
PLTP	0.0055134	2.25858	0.0083501	0.439041	390	1	-7.3501
MT1H	0.0055602	2.25491	0.0084935	0.439041	391	1	-6.2665
CAMSAP2	0.0055781	2.25351	0.0085417	0.439041	392	2	-6.8915
TGIF2LY	0.005607	2.25127	0.0085422	0.439041	393	1	-6.9103
BIN3	0.0056096	2.25107	0.0085571	0.439041	394	3	-6.6208
NPRL2	0.0056225	2.25007	0.008572	0.439041	395	2	-7.2774
RAB5B	0.0056538	2.24766	0.0086211	0.439041	396	1	-7.2692
CTTNBP2	0.0057086	2.24347	0.0086808	0.439041	397	3	-7.4704
TMEM66	0.0057118	2.24323	0.0086808	0.439041	398	2	-7.1656
BCKDHA	0.0057342	2.24153	0.0086808	0.439041	399	2	-7.8413
ACAA1	0.0057444	2.24076	0.0086808	0.439041	400	3	-6.6472
PLAC9	0.005758	2.23973	0.0087795	0.439041	401	3	-7.0775
PAXIP1-AS2	0.0057927	2.23712	0.0088339	0.439041	402	2	-6.7312
COL4A3	0.0057942	2.23701	0.0088339	0.439041	403	1	-7.9884
SYCE2	0.0058334	2.23408	0.0088344	0.439041	404	2	-7.6881
FBXO18	0.005841	2.23351	0.0088671	0.439041	405	1	-6.6951
DGCR8	0.005846	2.23314	0.0091526	0.440191	406	2	-5.6374
RP11-867G23.8	0.005856	2.2324	0.0089119	0.439041	407	2	-8.1934
KLRC4	0.0059059	2.22871	0.0092036	0.440191	408	3	-4.9826
PELI1	0.0059379	2.22637	0.0089668	0.439041	409	2	-5.7467
OR10X1	0.005947	2.2257	0.0089668	0.439041	410	2	-7.3235
PRR14L	0.0059813	2.2232	0.0090164	0.439041	411	1	-7.073
LPCAT3	0.0059941	2.22228	0.0090339	0.439041	412	3	-7.6501
TARM1	0.0059941	2.22228	0.0090339	0.439041	413	3	-6.0146
XPOT	0.0060524	2.21807	0.009051	0.439041	414	2	-6.7035
CLN8	0.0060749	2.21646	0.009051	0.439041	415	1	-7.459
ARPC4-TTLL3	0.0060827	2.2159	0.0094896	0.447622	416	3	-6.2127
ELMSAN1	0.0060986	2.21477	0.009051	0.439041	417	2	-7.6417
ARHGEF17	0.0061217	2.21313	0.0090515	0.439041	418	2	-6.973
C7orf55	0.0061448	2.21149	0.0090515	0.439041	419	2	-7.1799
GRM1	0.0061689	2.20979	0.0090515	0.439041	420	3	-7.0302
FGF20	0.0061811	2.20893	0.0090515	0.439041	421	3	-7.6609
GNAI3	0.006182	2.20887	0.0090515	0.439041	422	2	-7.2878
C10orf115	0.006185	2.20866	0.0095926	0.450416	423	1	-7.8015
GDI2	0.0061913	2.20822	0.0090515	0.439041	424	2	-6.777
MMP10	0.0061959	2.2079	0.0090515	0.439041	425	2	-6.9075
TVP23A	0.006279	2.20211	0.0091671	0.440191	426	3	-3.0372
MYT1	0.00628	2.20204	0.0091675	0.440191	427	2	-6.9952
SORBS3	0.0062933	2.20112	0.0091837	0.440191	428	3	-6.3012
SPATA21	0.0063015	2.20056	0.0091998	0.440191	429	3	-6.6923
TNFRSF8	0.0063175	2.19945	0.0092383	0.440824	430	2	-6.978
INPPL1	0.0063221	2.19914	0.0092662	0.441133	431	3	-8.0757
SPRR2D	0.0063375	2.19808	0.0093447	0.443841	432	3	-6.1838
IFT52	0.0063556	2.19684	0.009428	0.446765	433	2	-6.5
LOXL3	0.0063692	2.19592	0.0094569	0.447104	434	2	-7.6541
UBE2T	0.0064023	2.19366	0.009518	0.447935	435	1	-7.3774
CTDNEP1	0.006532	2.18495	0.0098892	0.463283	436	3	-5.0427
DDX50	0.0065894	2.18115	0.010041	0.467239	437	1	-6.6017
MORF4L1	0.0066163	2.17938	0.010042	0.467239	438	3	-5.5636
BLOC1S1	0.0066279	2.17862	0.010042	0.467239	439	3	-3.1734
GDPD2	0.0066361	2.17809	0.010105	0.469135	440	1	-7.9752
AL133262.1	0.0066909	2.17452	0.0077334	0.425623	441	1	-3.07
RAB35	0.0066975	2.17409	0.0086235	0.439041	442	1	-4.9378
SMDT1	0.0067296	2.17201	0.010168	0.469941	443	1	-7.4239
CMIP	0.0067483	2.17081	0.010168	0.469941	444	3	-7.0105
RNF175	0.0067764	2.169	0.010192	0.469953	445	1	-7.2479
FGF17	0.0068127	2.16668	0.010387	0.470578	446	3	-3.6827
NHLH2	0.0068232	2.16601	0.010445	0.470578	447	1	-7.269
XPO7	0.0068278	2.16572	0.010445	0.470578	448	3	-2.6556
PRAMEF4	0.0068559	2.16394	0.010473	0.470578	449	3	0.22481
MTMR9	0.0068624	2.16352	0.010473	0.470578	450	3	-6.2816
MUM1	0.0069221	2.15976	0.01058	0.470578	451	2	-6.685
OR5P2	0.0069319	2.15915	0.01058	0.470578	452	2	-6.7033
TTC30A	0.0069601	2.15738	0.01058	0.470578	453	3	-6.6566
COPB2	0.006981	2.15608	0.01062	0.470578	454	2	-6.2037
SURF4	0.0069973	2.15507	0.01062	0.470578	455	3	-7.146
SIRPA	0.0070303	2.15303	0.01062	0.470578	456	2	-7.3323
CYB5RL	0.0070335	2.15283	0.01062	0.470578	457	3	-5.9062
KCNK7	0.0070569	2.15139	0.01062	0.470578	458	1	-7.1583
RINT1	0.0070688	2.15065	0.010374	0.470578	459	1	-6.9956
GPS2	0.0071029	2.14856	0.010704	0.470578	460	3	-5.279
CARD16	0.0071095	2.14816	0.010704	0.470578	461	3	-7.2618
LRRN3	0.0071504	2.14567	0.010834	0.470578	462	1	-7.4354
SPAG11A	0.0071549	2.1454	0.010834	0.470578	463	3	-7.5451
LRTM1	0.0071591	2.14514	0.010834	0.470578	464	2	-6.5206
CCNC	0.0071649	2.14479	0.010834	0.470578	465	3	-4.7897
FOXN3	0.0071791	2.14393	0.010834	0.470578	466	3	-7.4497
NCLN	0.0071971	2.14284	0.010888	0.470578	467	1	-7.5024
CASKIN1	0.0073034	2.13647	0.010996	0.470661	468	3	-6.6827
CHST14	0.0073034	2.13647	0.010996	0.470661	470	3	-6.4359
SNX1	0.0073034	2.13647	0.010996	0.470661	469	3	-5.1023
AC131097.4	0.0073212	2.13542	0.010511	0.470578	471	1	-7.1139
ERMP1	0.0073293	2.13494	0.011103	0.470661	472	2	-7.1679
STARD13	0.0073373	2.13446	0.011104	0.470661	473	1	-7.6526
FGD5	0.0073494	2.13375	0.011104	0.470661	474	2	-7.4849
MSI2	0.007384	2.13171	0.011158	0.470661	475	1	-7.374
METTL24	0.0074307	2.12897	0.011158	0.470661	476	1	-7.6135
RIT2	0.0074595	2.12729	0.011191	0.470661	477	3	-7.3075
KEAP1	0.0074606	2.12723	0.011191	0.470661	478	2	-4.1435
C16orf46	0.0075189	2.12385	0.011308	0.472782	479	3	-7.5219
HINT1	0.0075242	2.12354	0.011309	0.472782	480	1	-7.3995
AC037459.4	0.007536	2.12286	0.011347	0.472782	481	3	-5.9061
CEP112	0.0075395	2.12266	0.011347	0.472782	482	3	-6.3241
ALG3	0.0075578	2.1216	0.011402	0.472782	483	3	-6.7592
CYP24A1	0.0075726	2.12075	0.011402	0.472782	484	2	-7.1018
WDR92	0.0076156	2.1183	0.010673	0.470578	485	1	-7.5086
PRED58	0.0076341	2.11724	0.011502	0.473696	486	2	-7.2675
SSX2B	0.0076522	2.11621	0.01154	0.473696	487	3	-6.5665
TRAF3IP1	0.0076577	2.1159	0.010673	0.470578	488	1	-7.3975
SPANXC	0.007658	2.11588	0.01154	0.473696	489	3	-5.7022
CYP46A1	0.0076643	2.11553	0.01154	0.473696	490	2	-7.5592
SCARA5	0.0076847	2.11437	0.01173	0.480563	491	3	-5.7979
EMC4	0.0077578	2.11026	0.011836	0.481088	492	2	-7.4522
TTC7B	0.0077637	2.10993	0.011836	0.481088	493	3	-7.3491
KCND1	0.0077684	2.10967	0.011836	0.481088	494	3	-7.1455
KIF2A	0.0078045	2.10765	0.011837	0.481088	495	1	-7.2599
RNF112	0.0078222	2.10667	0.011874	0.481663	496	3	-7.2287
APOBR	0.0078826	2.10333	0.01083	0.470578	497	2	-6.6677
RIOK3	0.0078903	2.10291	0.011971	0.48277	498	3	-5.111
KCTD20	0.0078979	2.10249	0.011972	0.48277	499	1	-6.1396
LENEP	0.0079021	2.10226	0.011972	0.48277	500	3	-5.3584
RCE1	0.0079526	2.09949	0.010831	0.470578	501	2	-6.4959
CLEC16A	0.0080231	2.09566	0.012276	0.493106	502	2	-7.0635
SOAT1	0.0080253	2.09554	0.012276	0.493106	503	3	-6.6108
COX6A1P2	0.008036	2.09496	0.010892	0.470578	504	1	-7.3931
PHF5A	0.0080465	2.09439	0.010892	0.470578	505	2	-5.5281
CGA	0.0080546	2.09396	0.012378	0.496217	506	2	-7.7082
SWSAP1	0.00816	2.08831	0.012568	0.499943	507	2	-7.6494
APOC4	0.0082672	2.08264	0.011061	0.470661	508	1	-7.9988
APOC4-APOC2	0.0082672	2.08264	0.011061	0.470661	509	1	-7.9988
PSME1	0.0083087	2.08047	0.012823	0.508659	510	2	-6.5475
QRICH1	0.0083359	2.07905	0.012865	0.508659	511	3	-6.4686
TCFL5	0.0083647	2.07755	0.011119	0.470661	512	2	-6.4453
ARPC4	0.008403	2.07557	0.01291	0.508659	513	3	-5.1537
SSX2	0.0084606	2.0726	0.012911	0.508659	514	3	-6.6807
FAM63A	0.0084639	2.07243	0.012911	0.508659	515	2	-6.1046
MPND	0.0085321	2.06894	0.013068	0.513858	516	3	-7.6063
COA3	0.0085516	2.06795	0.013105	0.514332	517	1	-7.0267
SEPTIN2	0.0085664	2.0672	0.013216	0.515041	518	2	-7.3027
KLF11	0.0086449	2.06324	0.013217	0.515041	519	1	-6.9952
IZUMO4	0.0087184	2.05956	0.013343	0.515041	520	2	-5.7837
LPHN1	0.0087382	2.05858	0.013344	0.515041	521	2	-7.2074
ELL3	0.0087402	2.05848	0.013344	0.515041	522	2	-6.4747
OR2G3	0.0087511	2.05794	0.013344	0.515041	523	2	-6.5642
TNFRSF10B	0.0087566	2.05766	0.013344	0.515041	524	2	-6.106
CCNJL	0.0087675	2.05712	0.013397	0.515041	525	2	-7.2685
C1orf106	0.0087849	2.05626	0.013397	0.515041	526	1	-7.3235
EPHA3	0.0087923	2.0559	0.011494	0.473696	527	1	-7.4152
LYST	0.0088316	2.05396	0.013398	0.515041	528	1	-6.5994
RPL39L	0.0089056	2.05034	0.010764	0.470578	529	2	-3.0189
AMN1	0.0089984	2.04583	0.013522	0.515041	530	2	-7.6407
CDHR3	0.0090039	2.04557	0.013522	0.515041	531	2	-6.7113
DOLPP1	0.0090482	2.04344	0.013522	0.515041	532	2	-7.3925
LNPEP	0.0090649	2.04264	0.013522	0.515041	533	1	-7.5968
MOK	0.0091115	2.04041	0.013592	0.515041	534	1	-7.5361
TEX19	0.0092475	2.03398	0.012468	0.497904	535	2	-6.9839
COPA	0.0092726	2.0328	0.012468	0.497904	536	2	-3.8045
ZNF157	0.0092937	2.03181	0.013656	0.515041	537	2	-7.4472
TTPA	0.0093448	2.02943	0.013723	0.515041	538	1	-7.492
UBE2H	0.0093914	2.02727	0.013723	0.515041	539	1	-6.5216
COX6A1	0.0094381	2.02512	0.013723	0.515041	540	1	-7.2176
GABRG2	0.0094628	2.02398	0.013723	0.515041	541	2	-7.4819
GPATCH2	0.0094847	2.02298	0.012534	0.499549	542	2	-6.0527
TMED10	0.0095421	2.02036	0.013724	0.515041	543	2	-6.0492
BCL2L2-PABPN1	0.0096446	2.01572	0.013724	0.515041	544	2	-6.1948
GRXCR1	0.0096618	2.01494	0.013724	0.515041	545	2	-7.3971
PTPLAD1	0.0097706	2.01008	0.013927	0.521732	546	2	-6.7945
TRMT1L	0.0099051	2.00414	0.013592	0.515041	547	2	-7.6193
MAP7	0.0099146	2.00372	0.014755	0.545502	548	2	-6.5781
TRHDE	0.0099436	2.00246	0.014755	0.545502	549	2	-6.3658
PTGS1	0.009951	2.00213	0.014756	0.545502	550	1	-7.2911
ACAT2	0.010036	1.99844	0.014827	0.545502	551	2	-3.331
ZDHHC4	0.010044	1.99809	0.014827	0.545502	552	2	-6.9403
ASPDH	0.010077	1.99667	0.014827	0.545502	553	2	-7.4011
CCL3	0.0101	1.99568	0.014827	0.545502	554	2	-7.1235
ZNF311	0.01037	1.98422	0.015196	0.553405	555	1	-7.0417
DKFZP667F0711	0.010406	1.98272	0.015197	0.553405	556	2	-7.2966
MFSD2B	0.010415	1.98234	0.015197	0.553405	557	2	-7.4852
TRBV9	0.010417	1.98226	0.015197	0.553405	558	2	-6.9858
LSG1	0.010557	1.97646	0.015268	0.553405	559	1	-6.3444
GRAPL	0.010649	1.97269	0.015337	0.553405	560	2	-6.0736
DNAAF2	0.01065	1.97265	0.015337	0.553405	561	1	-7.1859
CD9	0.010679	1.97147	0.015338	0.553405	562	2	-7.3449
PRAMEF26	0.010697	1.97074	0.015338	0.553405	563	1	-7.8304
TAAR1	0.01079	1.96698	0.016093	0.575862	564	1	-7.4635
ZNF682	0.010793	1.96686	0.016093	0.575862	565	2	-7.3614
MYOT	0.010823	1.96565	0.016177	0.575862	566	2	-6.4393
CLCN5	0.010841	1.96493	0.016177	0.575862	567	2	-7.4174
GIMAP4	0.010853	1.96445	0.016245	0.575862	568	2	-5.3831
PCP2	0.010871	1.96373	0.016245	0.575862	569	2	-7.5137
NUP62CL	0.010938	1.96106	0.016245	0.575862	570	2	-7.4039
GLB1L2	0.010976	1.95956	0.016245	0.575862	571	1	-8.1207
C9orf41	0.010998	1.95869	0.014482	0.539595	572	2	-6.5042
CLPP	0.011068	1.95593	0.014483	0.539595	573	2	-7.1773
AC022431.2	0.011069	1.95589	0.016324	0.575862	574	1	-7.8067
AC145676.2	0.011095	1.95487	0.016324	0.575862	575	2	-7.5826
ZNF470	0.011128	1.95358	0.014483	0.539595	576	2	-7.1406
HDX	0.011156	1.95249	0.016324	0.575862	577	2	-7.8174
USP32	0.011236	1.94939	0.016399	0.576534	578	2	-7.2646
RAB5A	0.011255	1.94865	0.0164	0.576534	579	1	-6.4132
C15ORF31	0.011408	1.94279	0.016549	0.576884	580	2	-6.4908
PTCHD3	0.011442	1.9415	0.016549	0.576884	581	1	-7.7363
FBN1	0.011488	1.93976	0.016549	0.576884	582	1	-6.5446
SCUBE1	0.011535	1.93798	0.01655	0.576884	583	1	-7.3485
RP11-178C3.1	0.011618	1.93487	0.0085865	0.439041	584	1	-0.42861
KCNH2	0.01164	1.93405	0.015092	0.553405	585	2	-7.5844
USP9Y	0.011729	1.93074	0.015518	0.558938	586	1	-7.3524
FAM46B	0.011824	1.92724	0.016631	0.578722	587	2	-7.2719
RCBTB2	0.011954	1.92249	0.016923	0.58283	588	1	-7.6723
RNASET2	0.012024	1.91995	0.016923	0.58283	589	1	-7.2984
RP11-514O12.4	0.012024	1.91995	0.016923	0.58283	590	2	-6.647
PES1	0.012064	1.91851	0.016215	0.575862	591	1	-6.6897
S1PR5	0.01214	1.91578	0.017003	0.58283	592	1	-7.401
FAM217B	0.012146	1.91557	0.015275	0.553405	593	1	-7.6703
ZNF852	0.012196	1.91378	0.017003	0.58283	594	2	-6.913
SNAP29	0.012247	1.91197	0.017003	0.58283	595	2	-6.2627
HTR1F	0.012279	1.91084	0.017004	0.58283	596	2	-6.5443
ZNF44	0.012298	1.91017	0.017004	0.58283	597	2	-5.6935
AL360181.1	0.012326	1.90918	0.017004	0.58283	598	1	-8.7928
TACR3	0.012432	1.90546	0.017755	0.601587	599	2	-7.0464
DDX3Y	0.012465	1.90431	0.017755	0.601587	600	2	-7.6832
PTRHD1	0.012483	1.90368	0.017755	0.601587	601	2	-6.5765
SNX5	0.012502	1.90302	0.016428	0.576564	602	2	-6.8669
EDNRA	0.012509	1.90278	0.017756	0.601587	603	2	-6.5187
BAZ1A	0.012651	1.89788	0.017899	0.60545	604	1	-5.9057
CD74	0.012856	1.89089	0.0176	0.601587	605	2	-6.1296
TAS2R31	0.012884	1.88995	0.018315	0.612469	606	1	-7.4704
TMPRSS2	0.01289	1.88975	0.018315	0.612469	607	2	-7.3294
C1orf116	0.01293	1.8884	0.018315	0.612469	608	1	-7.2292
CCDC27	0.012977	1.88683	0.018315	0.612469	609	2	-7.5295
BPNT1	0.012985	1.88656	0.017676	0.601587	610	2	-6.3197
TCP10L	0.012995	1.88622	0.018315	0.612469	611	2	-7.6018
CASP12	0.013047	1.88449	0.018475	0.616827	612	2	-7.5223
PDE7A	0.01307	1.88372	0.018559	0.617345	613	1	-5.3649
ACSM4	0.013116	1.8822	0.018559	0.617345	615	1	-6.9539
AL929472.1	0.013116	1.8822	0.011369	0.472782	614	1	-5.4446
PPP1R13B	0.013158	1.88081	0.018641	0.617345	616	2	-7.8018
PARPBP	0.013178	1.88015	0.017752	0.601587	617	2	-7.5808
TMEM199	0.013198	1.87949	0.018641	0.617345	618	2	-6.0239
GGTLC1	0.013209	1.87913	0.018641	0.617345	619	1	-8.0059
DUSP10	0.013313	1.87572	0.019446	0.632104	620	2	-7.1291
LTF	0.013349	1.87455	0.019446	0.632104	621	1	-6.4757
TMEM52	0.013459	1.87099	0.019528	0.632104	622	2	-7.7573
LRRC10B	0.013462	1.87089	0.01805	0.609545	623	2	-5.3921
ADH1C	0.013488	1.87005	0.019528	0.632104	624	2	-7.2358
UBA5	0.013569	1.86745	0.019609	0.632104	625	2	-7.1407
PPP3R2	0.013581	1.86707	0.019609	0.632104	626	1	-7.5401
CP	0.013628	1.86557	0.019609	0.632104	627	1	-7.7158
SHMT2	0.013674	1.8641	0.019609	0.632104	628	1	-5.9887
STAM	0.013709	1.86299	0.019609	0.632104	629	2	-6.0173
BCL2L2	0.013744	1.86189	0.019609	0.632104	630	1	-7.3297
GPR15	0.013761	1.86135	0.018189	0.612469	631	2	-7.5611
SLC10A2	0.01386	1.85824	0.019691	0.632774	632	1	-7.0121
CBR1	0.01387	1.85792	0.019691	0.632774	633	2	-7.9759
CRELD2	0.013988	1.85424	0.019936	0.635682	634	2	-6.6566
FGF22	0.014139	1.84958	0.019937	0.635682	635	2	-6.5638
ZNF235	0.014154	1.84912	0.019937	0.635682	636	2	-7.0548
SLC12A1	0.014181	1.84829	0.019937	0.635682	637	2	-7.0753
ARMS2	0.014231	1.84676	0.020675	0.638443	638	1	-7.3749
FUT10	0.014303	1.84457	0.020676	0.638443	639	2	-7.0848
CD180	0.014371	1.84251	0.020676	0.638443	640	1	-8.0826
KRTAP9-6	0.014461	1.8398	0.020755	0.638443	641	2	-6.9472
AMPD1	0.01451	1.83833	0.020755	0.638443	642	1	-7.1051
IZUMO1	0.014556	1.83696	0.020755	0.638443	643	1	-7.5627
C15orf43	0.014591	1.83591	0.020755	0.638443	644	2	-7.1016
FOXE1	0.014649	1.83419	0.020755	0.638443	645	1	-7.3627
UBFD1	0.014694	1.83286	0.020755	0.638443	646	2	-6.288
IGKV1D-13	0.014777	1.83041	0.020755	0.638443	647	2	-7.1804
ROCK2	0.014784	1.83021	0.020755	0.638443	648	2	-8.2292
KCNH3	0.014805	1.82959	0.020755	0.638443	649	2	-6.5266
RBBP8NL	0.014881	1.82737	0.020755	0.638443	650	1	-7.4469
ITIH1	0.014928	1.826	0.020755	0.638443	651	1	-7.2127
CHST10	0.015	1.82391	0.020755	0.638443	652	2	-7.8097
CYP20A1	0.015113	1.82065	0.020839	0.638443	653	2	-7.8231
MORN4	0.015206	1.81799	0.020917	0.638443	654	1	-6.8906
LL22NC03-75H12.2	0.015242	1.81696	0.018935	0.626063	655	1	-8.3663
SLC7A9	0.015272	1.8161	0.020917	0.638443	656	2	-7.4665
IFNA14	0.015326	1.81457	0.019	0.627203	657	1	-7.492
AREL1	0.015345	1.81403	0.021	0.638443	658	1	-6.9714
ACBD6	0.015364	1.8135	0.021	0.638443	659	2	-6.9567
TSPAN3	0.015392	1.8127	0.021	0.638443	660	2	-6.8716
SENP8	0.015441	1.81132	0.021	0.638443	661	2	-6.4718
OR52A5	0.015485	1.81009	0.021091	0.638443	662	2	-6.5319
IGSF5	0.015489	1.80998	0.019097	0.628396	663	2	-6.854
LRP8	0.015498	1.80972	0.021092	0.638443	664	2	-7.1804
CLN3	0.015499	1.8097	0.024294	0.655782	665	2	-7.0611
NSRP1	0.015531	1.8088	0.021189	0.638443	666	1	-6.6948
THBD	0.015554	1.80816	0.021189	0.638443	667	2	-7.8918
GLYR1	0.015577	1.80752	0.02119	0.638443	668	1	-7.3526
SCARF1	0.015624	1.80621	0.021277	0.638443	669	1	-7.1484
ACTG2	0.015632	1.80599	0.021277	0.638443	670	2	-7.0468
NLN	0.015639	1.80579	0.021277	0.638443	671	2	-7.1397
RPL13	0.015641	1.80574	0.019088	0.628396	672	1	-6.4608
HSPB2-C11orf52	0.015654	1.80537	0.021277	0.638443	673	2	-7.4957
FAM26E	0.01571	1.80382	0.021277	0.638443	674	2	-5.605
RAB31	0.015716	1.80366	0.021277	0.638443	675	2	-7.0777
IGDCC3	0.015739	1.80302	0.021454	0.638443	676	2	-7.6634
CD274	0.015899	1.79863	0.021554	0.638443	677	2	-6.0121
ZFAND2B	0.015902	1.79855	0.021554	0.638443	678	2	-7.1655
DCLRE1A	0.015924	1.79795	0.021555	0.638443	679	2	-6.8547
MYOD1	0.015974	1.79659	0.021646	0.638443	680	2	-7.5363
BLMH	0.015995	1.79602	0.021646	0.638443	681	2	-6.6817
ZUFSP	0.016017	1.79542	0.021646	0.638443	682	2	-7.6323
CTDSPL2	0.016035	1.79493	0.019358	0.632104	683	1	-6.2623
ANO10	0.016125	1.7925	0.021736	0.638443	684	2	-7.662
CCDC183	0.016134	1.79226	0.021736	0.638443	685	1	-7.0869
ZNF579	0.01618	1.79102	0.021737	0.638443	686	1	-7.2693
PRAP1	0.016301	1.78779	0.019336	0.632104	687	2	-6.6148
DEFB104A	0.016342	1.78669	0.021831	0.638443	688	2	-5.2736
BAP1	0.016381	1.78566	0.021931	0.638443	690	2	-2.5337
JPH3	0.016381	1.78566	0.021931	0.638443	689	2	-6.7324
MAP1LC3B	0.016466	1.78341	0.019798	0.6352	691	2	-7.1876
KIFC1	0.016472	1.78325	0.022024	0.638443	692	2	-6.5825
PCDHGA11	0.016504	1.78241	0.022024	0.638443	693	2	-4.6249
TTC12	0.016567	1.78076	0.022109	0.638443	694	2	-6.3161
ZC3H13	0.016568	1.78073	0.019336	0.632104	695	1	-7.3608
DEFB104B	0.016661	1.7783	0.022207	0.638443	696	2	-6.6106
HMGB3	0.016676	1.77791	0.022207	0.638443	697	2	-6.3222
KRT83	0.01669	1.77754	0.022207	0.638443	698	1	-6.9769
ZNF503	0.016736	1.77635	0.022207	0.638443	699	2	-6.6105
SNAPIN	0.016782	1.77516	0.022208	0.638443	700	2	-6.2126
C1orf141	0.016829	1.77394	0.022208	0.638443	701	2	-6.5301
FCGR2B	0.016874	1.77278	0.022303	0.638443	702	2	-7.6969
FAM26F	0.016947	1.77091	0.022303	0.638443	703	2	-5.9522
PPP3CC	0.017153	1.76566	0.022304	0.638443	704	2	-7.0407
RSPH1	0.017161	1.76546	0.022304	0.638443	705	2	-6.8477
HAGHL	0.017198	1.76452	0.022399	0.638443	706	2	-7.1193
SERINC3	0.017199	1.7645	0.022399	0.638443	707	1	-7.7495
DRC1	0.017228	1.76377	0.022399	0.638443	708	2	-7.4484
NOS1	0.017292	1.76215	0.0224	0.638443	709	1	-7.6623
AC011500.1	0.017338	1.761	0.0224	0.638443	710	1	-7.8766
SMIM3	0.017443	1.75838	0.022498	0.638443	711	2	-7.3476
SFTPA2	0.017477	1.75753	0.022593	0.638443	712	1	-4.9214
OSER1	0.017532	1.75617	0.022774	0.638443	713	2	-7.3355
ZNF554	0.01757	1.75523	0.022774	0.638443	714	1	-7.6119
ZNF544	0.017641	1.75348	0.022874	0.638443	715	2	-6.7124
C19orf55	0.017704	1.75193	0.022874	0.638443	716	2	-6.4868
PBX3	0.01777	1.75031	0.021451	0.638443	717	2	-7.4108
SYNGAP1	0.017915	1.74678	0.022875	0.638443	718	2	-6.638
FUT8	0.017945	1.74606	0.022875	0.638443	719	2	-7.4116
ATP6V0B	0.018125	1.74172	0.023067	0.638443	720	1	-6.7732
NISCH	0.018141	1.74134	0.023067	0.638443	721	2	-6.2113
TDRD1	0.018218	1.7395	0.023067	0.638443	722	2	-6.2809
C17orf51	0.018232	1.73917	0.023068	0.638443	723	2	-6.9302
FTSJ1	0.01831	1.73731	0.023068	0.638443	724	1	-7.3459
ANKRD23	0.018403	1.73511	0.023068	0.638443	725	1	-7.4313
SLC31A2	0.018453	1.73393	0.023068	0.638443	726	2	-7.2947
ANKRD11	0.018491	1.73304	0.023171	0.638443	727	2	-6.3192
PDXDC1	0.018542	1.73184	0.023171	0.638443	728	1	-7.0032
DEAF1	0.018621	1.73	0.023171	0.638443	729	2	-7.3795
DEFB126	0.018653	1.72925	0.022018	0.638443	730	2	-6.8319
TRBJ2-2P	0.018692	1.72834	0.022068	0.638443	731	1	-8.267
ATP7B	0.018703	1.72809	0.022486	0.638443	732	2	-6.854
EPHB2	0.018727	1.72753	0.023171	0.638443	733	1	-7.2074
ZNF321P	0.018737	1.7273	0.023171	0.638443	734	2	-7.0687
C11orf53	0.018767	1.72661	0.023171	0.638443	735	2	-7.5688
ULK4	0.018773	1.72647	0.023171	0.638443	736	2	-5.9461
NPIPA8	0.018783	1.72624	0.023171	0.638443	737	2	-6.029
GZMA	0.018819	1.7254	0.02328	0.638443	738	1	-7.2129
PLK5	0.018844	1.72483	0.02328	0.638443	739	2	-6.2572
ARL8B	0.01889	1.72377	0.023281	0.638443	740	2	-5.491
CDC20	0.018911	1.72329	0.023281	0.638443	741	1	-6.2623
SPATS2	0.018958	1.72221	0.023375	0.638443	742	1	-7.1243
RRP1B	0.019006	1.72111	0.023375	0.638443	743	2	-6.347
EMCN	0.019053	1.72004	0.023375	0.638443	744	2	-8.0049
CHSY1	0.019062	1.71983	0.022763	0.638443	745	2	-6.1081
INPP5E	0.019096	1.71906	0.023376	0.638443	746	1	-7.7246
MYSM1	0.019121	1.71849	0.022868	0.638443	747	2	-7.4196
OGDH	0.019143	1.71799	0.023376	0.638443	748	1	-7.1939
AK1	0.019146	1.71792	0.023376	0.638443	749	2	-7.007
UMOD	0.019161	1.71758	0.023376	0.638443	750	2	-6.7229
VPS13A	0.019184	1.71706	0.023376	0.638443	751	2	-5.5375
ANKFN1	0.019202	1.71665	0.02296	0.638443	752	1	-7.3886
TRIM59	0.019265	1.71523	0.023169	0.638443	753	1	-6.8213
LYPD6	0.019278	1.71494	0.024209	0.655782	754	2	-7.343
DCTN2	0.019488	1.71023	0.024318	0.655782	755	2	-6.8939
SCYL1	0.019512	1.7097	0.024318	0.655782	756	2	-6.8309
MTMR3	0.019559	1.70865	0.024318	0.655782	757	2	-7.5035
NFKB1	0.019598	1.70779	0.024318	0.655782	758	2	-7.5065
DHX57	0.019617	1.70737	0.024318	0.655782	759	2	-6.5958
MAN2C1	0.0197	1.70553	0.024417	0.655782	760	2	-6.5428
WARS	0.019743	1.70459	0.024417	0.655782	761	1	-6.0506
MYCT1	0.019753	1.70437	0.023168	0.638443	762	1	-5.9498
SLC1A1	0.019841	1.70244	0.024518	0.655782	763	2	-7.323
ADH1B	0.019882	1.70154	0.024518	0.655782	764	1	-6.5949
AGAP7	0.01993	1.70049	0.023778	0.648574	765	2	-7.8347
BIRC6	0.019974	1.69953	0.024519	0.655782	766	1	-7.3598
RP11-114H20.1	0.020044	1.69802	0.024751	0.655782	768	2	-7.4982
RP11-363G10.2	0.020044	1.69802	0.024751	0.655782	767	2	-6.7569
PPIB	0.020063	1.6976	0.024751	0.655782	769	2	-6.0097
FAM174B	0.020094	1.69693	0.024752	0.655782	770	2	-6.9697
ADH1A	0.020113	1.69652	0.024752	0.655782	771	1	-7.908
EVL	0.020159	1.69553	0.024859	0.655782	772	1	-7.2936
DNASE1L2	0.020173	1.69523	0.024859	0.655782	773	2	-6.517
CAMKV	0.020213	1.69437	0.024859	0.655782	774	2	-7.1856
DPF3	0.020252	1.69353	0.024859	0.655782	775	1	-5.5961
MAGEB2	0.02034	1.69165	0.025068	0.655782	776	2	-7.8954
AP1M1	0.02036	1.69122	0.025068	0.655782	777	2	-7.3082
TNNT1	0.020388	1.69063	0.025068	0.655782	778	2	-6.5675
SLC47A2	0.02039	1.69058	0.025068	0.655782	779	2	-6.475
TRBV6-1	0.020436	1.6896	0.025068	0.655782	780	1	-7.5384
VSTM2B	0.020508	1.68808	0.025184	0.655782	781	2	-7.1449
PTTG1IP	0.020528	1.68765	0.025184	0.655782	782	2	-5.9954
KIF5C	0.02054	1.6874	0.025184	0.655782	783	2	-6.9967
KREMEN2	0.020621	1.68569	0.025184	0.655782	784	1	-6.8397
SLC41A2	0.02066	1.68487	0.025184	0.655782	785	2	-6.4625
FRMD5	0.020724	1.68353	0.025277	0.655782	786	2	-5.2859
SLC29A1	0.020764	1.68269	0.025277	0.655782	787	2	-6.7186
MORC2	0.020806	1.68181	0.025277	0.655782	788	1	-6.9606
SCYL3	0.020898	1.6799	0.025393	0.655782	789	1	-7.3127
MST4	0.020941	1.679	0.025394	0.655782	790	2	-7.5617
FSCB	0.020976	1.67828	0.025418	0.655782	791	2	-7.2381
CXorf24	0.021095	1.67582	0.025604	0.655782	792	2	-8.0538
MFSD11	0.021168	1.67432	0.025604	0.655782	793	2	-4.4769
TNRC6A	0.021175	1.67418	0.025604	0.655782	794	2	-7.2003
LANCL2	0.021221	1.67323	0.025717	0.655782	795	1	-7.793
GTF2A2	0.021267	1.67229	0.025717	0.655782	796	1	-6.4658
GPR26	0.021289	1.67184	0.025717	0.655782	797	2	-6.8875
CLEC1A	0.021346	1.67068	0.025718	0.655782	798	2	-6.6378
RP11-432B6.3	0.021382	1.66995	0.025718	0.655782	799	2	-7.7414
ZC3H10	0.021406	1.66946	0.025523	0.655782	800	1	-6.886
EIF3K	0.021444	1.66869	0.025718	0.655782	801	2	-7.276
USE1	0.021575	1.66605	0.025828	0.655782	802	2	-7.5904
TRBJ2-5	0.021602	1.66551	0.02532	0.655782	803	2	-8.5731
EPB41L5	0.021648	1.66458	0.025828	0.655782	804	2	-7.4166
CDYL	0.021655	1.66444	0.026415	0.659287	805	2	-8.2283
KLRG2	0.021682	1.6639	0.025828	0.655782	806	1	-7.4633
NADSYN1	0.021689	1.66376	0.025828	0.655782	807	2	-7.2519
RUNX2	0.021705	1.66344	0.025828	0.655782	808	2	-7.0259
AC017081.1	0.021715	1.66324	0.025536	0.655782	809	2	-4.1576
DBR1	0.021728	1.66298	0.025828	0.655782	810	1	-6.8814
LMTK2	0.02173	1.66294	0.025828	0.655782	811	2	-6.8629
AC069547.2	0.021738	1.66278	0.026415	0.659287	812	2	-4.8846
IGF2	0.021774	1.66206	0.025931	0.657586	813	1	-7.7079
WRN	0.021779	1.66196	0.026415	0.659287	814	2	-8.0249
SPAG5	0.021828	1.66099	0.026158	0.659287	815	2	-7.1239
PPDPF	0.021959	1.65839	0.026158	0.659287	816	1	-7.3452
TSPAN16	0.022042	1.65675	0.026159	0.659287	817	2	-7.6399
AGAP4	0.02212	1.65521	0.026159	0.659287	818	1	-6.5901
UBE2J1	0.02215	1.65463	0.026159	0.659287	819	2	-6.2762
CPXM1	0.022189	1.65386	0.026255	0.659287	820	1	-7.2959
C17orf53	0.022199	1.65367	0.026255	0.659287	821	2	-8.1075
NINJ2	0.022216	1.65333	0.026255	0.659287	822	2	-7.035
C5orf17	0.022265	1.65238	0.026379	0.659287	823	2	-5.9177
OR10J4	0.022277	1.65214	0.026922	0.669502	824	2	-6.03
LDHAL6A	0.022307	1.65156	0.026485	0.659441	825	2	-6.8907
BHLHE22	0.022332	1.65107	0.026485	0.659441	826	2	-8.2868
TNIP3	0.02242	1.64936	0.027333	0.671194	827	1	-7.1875
KCTD2	0.022431	1.64915	0.027334	0.671194	828	2	-7.2125
FKBP11	0.022466	1.64847	0.027334	0.671194	829	2	-6.5529
ZMYND12	0.022477	1.64826	0.027384	0.671194	830	2	-6.3483
RP11-111M22.2	0.022485	1.64811	0.026413	0.659287	831	2	-6.194
S100P	0.02249	1.64801	0.027435	0.671194	832	2	-7.5241
GAGE2C	0.02255	1.64685	0.027146	0.671194	833	2	-4.7795
AC011239.1	0.022598	1.64593	0.027545	0.671194	834	2	-7.4933
B9D2	0.02265	1.64493	0.027545	0.671194	835	1	-7.1585
TMLHE	0.022681	1.64434	0.027545	0.671194	836	2	-7.3892
SLC19A1	0.022731	1.64338	0.02766	0.671194	837	2	-6.6368
SH3D21	0.022742	1.64317	0.02766	0.671194	838	2	-6.7197
GJD4	0.022748	1.64306	0.02766	0.671194	839	2	-7.772
MROH1	0.022773	1.64258	0.02766	0.671194	840	2	-8.0674
JRKL	0.022775	1.64254	0.027262	0.671194	841	1	-7.0976
ATL1	0.022789	1.64227	0.02766	0.671194	842	1	-6.8307
OSTC	0.022806	1.64195	0.02766	0.671194	843	2	-6.565
PPARA	0.022865	1.64083	0.027892	0.671194	844	2	-7.7223
MAP2K5	0.022927	1.63965	0.02812	0.671194	845	1	-6.1852
TMEM45A	0.022932	1.63956	0.02812	0.671194	846	2	-6.7755
DENND6B	0.022941	1.63939	0.02812	0.671194	847	2	-7.0743
MLXIPL	0.022962	1.63899	0.027361	0.671194	848	2	-6.4016
C15orf59	0.022977	1.63871	0.027361	0.671194	849	2	-7.3106
DTX1	0.022991	1.63844	0.02812	0.671194	850	2	-7.3569
STX16-NPEPL1	0.023045	1.63742	0.02812	0.671194	851	2	-7.1028
RBM18	0.023058	1.63718	0.028121	0.671194	852	2	-6.2988
OR52H1	0.02306	1.63714	0.027361	0.671194	853	2	-6.4792
AP5S1	0.023065	1.63705	0.028121	0.671194	854	2	-8.118
PDSS1	0.023111	1.63618	0.028121	0.671194	855	1	-7.7288
FOXD1	0.023157	1.63532	0.028121	0.671194	856	1	-7.1752
PEX1	0.023249	1.6336	0.028951	0.688448	857	1	-7.3084
ZNF844	0.023257	1.63345	0.027703	0.671194	858	2	-5.923
DRG2	0.023328	1.63212	0.029065	0.688448	859	2	-7.2536
G6PC	0.023341	1.63188	0.029065	0.688448	860	1	-7.4858
ARL5B	0.023355	1.63162	0.027805	0.671194	861	2	-7.6717
GABRG3	0.023404	1.63071	0.029184	0.688448	862	2	-6.6929
PAQR9	0.023412	1.63056	0.029184	0.688448	863	2	-7.2113
BPGM	0.023438	1.63008	0.029184	0.688448	864	2	-6.8759
SP140	0.023618	1.62676	0.029418	0.688448	865	1	-6.5854
SLAMF9	0.023664	1.62591	0.029418	0.688448	866	1	-7.8008
AC139426.2	0.023705	1.62516	0.029653	0.688448	867	2	-7.0967
LRRFIP2	0.023752	1.6243	0.029654	0.688448	868	2	-6.8091
SCGB1C1	0.02376	1.62415	0.029654	0.688448	869	2	-7.6061
TBCK	0.023802	1.62339	0.029776	0.688448	870	1	-7.0244
SLC22A4	0.023811	1.62322	0.029776	0.688448	871	2	-7.7811
UBE2R2	0.02382	1.62306	0.029777	0.688448	872	2	-6.8403
TP53I3	0.023837	1.62275	0.029893	0.688448	873	2	-7.2393
ZNF281	0.023848	1.62255	0.029893	0.688448	874	1	-7.1152
RNF123	0.023853	1.62246	0.028132	0.671194	875	1	-7.4584
ADK	0.023865	1.62224	0.028132	0.671194	876	2	-7.1246
CETN2	0.023871	1.62213	0.029893	0.688448	877	2	-5.4501
PRAMEF17	0.02394	1.62088	0.030599	0.688448	878	1	-7.1615
EFCAB7	0.02398	1.62015	0.028132	0.671194	879	2	-7.5086
GAGE2B	0.024003	1.61973	0.028132	0.671194	880	2	-4.5748
C15orf37	0.024128	1.61748	0.030943	0.688448	881	2	-7.5793
MAP3K7	0.024145	1.61717	0.031072	0.688448	882	2	-6.3408
DPM3	0.024256	1.61518	0.031072	0.688448	883	2	-7.0259
MYBBP1A	0.024262	1.61507	0.031072	0.688448	884	1	-7.2845
SEC62	0.024304	1.61432	0.031072	0.688448	885	2	-6.543
TDRKH	0.024334	1.61379	0.031072	0.688448	886	2	-7.2821
RBM48	0.02435	1.6135	0.029265	0.688448	887	1	-6.8669
B3GALNT2	0.024433	1.61202	0.029265	0.688448	888	1	-6.5124
OR2L2	0.024446	1.61179	0.031072	0.688448	890	1	-7.0164
TIMM22	0.024446	1.61179	0.031072	0.688448	889	2	-7.1555
PNMA2	0.024506	1.61073	0.031072	0.688448	891	2	-7.6214
RPL24	0.024557	1.60982	0.029265	0.688448	892	1	-6.8669
RFPL2	0.024592	1.60921	0.031072	0.688448	893	2	-7.655
GAS2	0.024623	1.60866	0.031072	0.688448	894	2	-6.6719
KIAA0319L	0.024661	1.60799	0.031072	0.688448	895	2	-7.1578
STUB1	0.024739	1.60662	0.031072	0.688448	896	2	-7.0482
ARMCX4	0.02486	1.6045	0.031072	0.688448	897	1	-5.8037
EPX	0.024904	1.60373	0.031072	0.688448	899	2	-6.4815
SLC13A3	0.024904	1.60373	0.031072	0.688448	898	2	-7.8813
C9orf163	0.024906	1.6037	0.031072	0.688448	900	1	-7.4939
SSSCA1	0.02493	1.60328	0.031072	0.688448	901	2	-6.8657
AKAP6	0.024936	1.60317	0.028644	0.682612	902	2	-7.3293
MTNR1A	0.024952	1.60289	0.031072	0.688448	903	1	-6.6189
TMEM258	0.024978	1.60244	0.029919	0.688448	904	2	-5.847
TP53TG3	0.024998	1.60209	0.031197	0.688448	905	2	-6.1102
C16orf78	0.025044	1.6013	0.031197	0.688448	906	1	-7.6935
FHL3	0.025052	1.60116	0.031197	0.688448	907	2	-7.517
CHRNA4	0.02513	1.59981	0.031198	0.688448	908	2	-6.2926
CYP2U1	0.025226	1.59815	0.031449	0.688448	909	2	-6.6338
PRSS35	0.025228	1.59812	0.031449	0.688448	910	2	-6.8377
ST8SIA2	0.025235	1.598	0.031449	0.688448	911	2	-7.1093
C4orf51	0.025244	1.59784	0.031449	0.688448	912	2	-6.8078
ZNF629	0.025344	1.59612	0.030138	0.688448	913	1	-6.6229
FBXL7	0.025358	1.59589	0.031449	0.688448	914	2	-7.1553
GRIN2D	0.025366	1.59575	0.031449	0.688448	915	2	-6.4076
CSE1L	0.025389	1.59535	0.031449	0.688448	916	1	-6.7745
BCL2L15	0.025457	1.59419	0.031449	0.688448	917	2	-6.7039
ZBTB33	0.025472	1.59394	0.031449	0.688448	918	2	-6.2322
SLC51B	0.025542	1.59275	0.031449	0.688448	919	2	-7.1906
SATL1	0.025603	1.59171	0.031449	0.688448	920	2	-7.6778
CDC20B	0.025675	1.59049	0.03037	0.688448	921	1	-7.3293
WDPCP	0.025682	1.59037	0.031449	0.688448	922	2	-7.1449
AL354718.1	0.025709	1.58991	0.031449	0.688448	923	2	-7.1463
KRTAP23-1	0.025718	1.58976	0.031449	0.688448	924	2	-7.403
OXCT2	0.025735	1.58948	0.030628	0.688448	925	2	-6.8226
SIMC1	0.025753	1.58917	0.031449	0.688448	926	2	-7.2864
PPARG	0.025871	1.58719	0.031576	0.688448	927	1	-7.4899
ZNF423	0.025898	1.58673	0.030487	0.688448	928	2	-6.3838
CCDC40	0.025917	1.58642	0.031576	0.688448	929	1	-7.6127
MYO1H	0.026009	1.58488	0.031576	0.688448	930	1	-7.1407
TCEANC2	0.026101	1.58334	0.031576	0.688448	931	1	-6.9098
E2F7	0.026147	1.58258	0.031576	0.688448	932	1	-6.7179
ENO4	0.026168	1.58223	0.031576	0.688448	933	2	-7.3147
LUC7L2	0.026171	1.58218	0.030831	0.688448	934	1	-7.1876
KIF17	0.026239	1.58105	0.031576	0.688448	935	2	-7.1071
CTXN2	0.026254	1.5808	0.03107	0.688448	936	1	-7.0588
E4F1	0.026284	1.58031	0.031576	0.688448	937	2	-6.7982
FGFR1	0.026284	1.58031	0.031576	0.688448	938	1	-7.5523
ASB7	0.026328	1.57958	0.031576	0.688448	939	2	-7.4887
KANK3	0.026376	1.57879	0.031576	0.688448	940	1	-7.2274
FAM25E	0.026422	1.57803	0.031576	0.688448	941	1	-8.4571
AP001631.10	0.026514	1.57652	0.031576	0.688448	942	2	-8.0401
ARHGAP30	0.026587	1.57533	0.031701	0.688448	943	2	-6.5035
C11orf86	0.026587	1.57533	0.031701	0.688448	945	2	-7.9643
RBMS2	0.026587	1.57533	0.031701	0.688448	944	2	-6.2218
PADI1	0.026724	1.5731	0.031507	0.688448	946	2	-6.4105
NRBP2	0.026791	1.57201	0.031622	0.688448	947	1	-7.3293
ZNF768	0.0269	1.57025	0.032523	0.703067	948	2	-7.0213
SSR3	0.026927	1.56981	0.03267	0.703067	949	2	-6.2003
IL10RB	0.026973	1.56907	0.032909	0.703067	950	1	-7.5745
FAU	0.027122	1.56668	0.032592	0.703067	951	1	-5.2018
NLRP6	0.027157	1.56612	0.033039	0.703067	952	1	-6.6253
ZNF491	0.027161	1.56605	0.033039	0.703067	953	2	-6.9458
DPM1	0.027179	1.56577	0.033039	0.703067	954	2	-6.8079
PLEKHA2	0.027224	1.56505	0.033172	0.703067	955	2	-6.1768
THSD4	0.027233	1.5649	0.033172	0.703067	956	2	-7.7527
TFRC	0.027235	1.56487	0.032664	0.703067	957	1	-7.4964
NT5DC2	0.02726	1.56447	0.033172	0.703067	958	2	-6.472
CCM2L	0.027278	1.56419	0.033172	0.703067	959	2	-6.211
MBTPS1	0.027294	1.56393	0.033172	0.703067	960	1	-6.5916
ESRRA	0.027296	1.5639	0.033172	0.703067	961	2	-6.458
EBI3	0.027314	1.56361	0.033172	0.703067	962	2	-7.1978
AL033381.1	0.027377	1.56261	0.032712	0.703067	963	2	-7.3706
DPYD	0.027386	1.56247	0.033172	0.703067	964	1	-7.2181
PTEN	0.027405	1.56217	0.033172	0.703067	965	2	-6.9973
KCTD12	0.027432	1.56174	0.033172	0.703067	966	2	-7.0265
SLC52A3	0.027454	1.56139	0.033172	0.703067	967	2	-7.6156
AP5M1	0.027468	1.56117	0.033172	0.703067	968	2	-7.3405
KCNJ12	0.027495	1.56075	0.033172	0.703067	969	2	-6.8388
RTP1	0.027541	1.56002	0.033297	0.703067	970	2	-7.4541
ZNF490	0.027554	1.55982	0.033297	0.703067	971	2	-7.0973
CST5	0.027577	1.55945	0.033297	0.703067	972	2	-7.2105
DNAJA3	0.027615	1.55885	0.033297	0.703067	973	1	-7.342
STK40	0.027661	1.55813	0.033297	0.703067	974	1	-6.7836
C8orf37	0.027722	1.55718	0.034163	0.714338	975	2	-7.0822
GDPD5	0.027754	1.55667	0.034227	0.714338	976	2	-6.0562
ZNF208	0.027786	1.55617	0.03429	0.714338	977	2	-7.676
PIPOX	0.027895	1.55447	0.034291	0.714338	978	2	-7.3957
RAB38	0.027931	1.55391	0.034291	0.714338	979	2	-7.3975
SLC25A35	0.027941	1.55376	0.034291	0.714338	980	2	-6.9922
WDR75	0.028189	1.54992	0.034417	0.714338	981	1	-6.7885
GINS1	0.028212	1.54957	0.034407	0.714338	982	1	-6.9697
TM4SF20	0.028257	1.54887	0.034407	0.714338	983	1	-6.6819
DOCK4	0.028297	1.54826	0.034407	0.714338	984	2	-7.9647
GOLGA8G	0.028361	1.54728	0.034407	0.714338	985	2	-6.7249
FGF6	0.028395	1.54676	0.034526	0.714338	986	1	-8.0856
USP13	0.028407	1.54657	0.034526	0.714338	987	2	-7.2142
PFKFB4	0.028481	1.54544	0.034658	0.714338	988	2	-6.9747
UBR1	0.028532	1.54467	0.034783	0.714338	989	1	-7.0743
MGAT5B	0.028578	1.54397	0.034783	0.714338	990	1	-7.6716
ZNF783	0.028614	1.54342	0.034783	0.714338	991	2	-6.1353
ZC3H12C	0.028628	1.54321	0.034783	0.714338	992	2	-6.2053
LRWD1	0.028646	1.54294	0.034915	0.714338	993	2	-7.16
BZW2	0.028649	1.54289	0.034557	0.714338	994	1	-5.1395
GAGE12C	0.028651	1.54286	0.034557	0.714338	995	2	-3.5082
YPEL4	0.028762	1.54118	0.034915	0.714338	996	1	-7.4459
AL355390.1	0.028776	1.54097	0.034916	0.714338	997	2	-5.3362
LIN37	0.028803	1.54056	0.034916	0.714338	998	2	-7.3436
KMT2C	0.028807	1.5405	0.034916	0.714338	999	1	-7.278
KLHL41	0.028853	1.53981	0.034916	0.714338	1000	1	-6.7837
ASXL2	0.028868	1.53958	0.034916	0.714338	1001	2	-7.1842
ZNF365	0.028945	1.53843	0.035046	0.714338	1002	1	-7.6472
TMPRSS11D	0.028961	1.53819	0.035046	0.714338	1003	2	-5.3447
MYL4	0.028998	1.53763	0.035046	0.714338	1004	2	-7.4087
THSD7A	0.029021	1.53729	0.034557	0.714338	1005	1	-8.3342
MFSD8	0.029082	1.53638	0.035047	0.714338	1006	1	-7.1917
CEACAM6	0.029108	1.53599	0.034557	0.714338	1007	2	-8.2506
CCDC93	0.029109	1.53597	0.035047	0.714338	1008	2	-7.1799
MARCHF2	0.029175	1.53499	0.045247	0.769187	1009	1	-7.602
MROH8	0.02922	1.53432	0.035183	0.715186	1010	1	-7.1218
SMARCB1	0.029265	1.53365	0.035183	0.715186	1011	1	-7.1083
HGD	0.029285	1.53335	0.035309	0.715186	1012	2	-7.4723
CDKN1A	0.029304	1.53307	0.035309	0.715186	1013	2	-6.6146
RNASE3	0.029323	1.53279	0.035309	0.715186	1014	2	-6.8732
DNTTIP2	0.0294	1.53165	0.034794	0.714338	1015	2	-5.2616
RNPEP	0.02949	1.53033	0.03531	0.715186	1016	2	-6.6652
CABYR	0.02954	1.52959	0.035592	0.715186	1017	1	-6.6137
DDX26B	0.029612	1.52853	0.035843	0.715186	1018	2	-6.6646
AP2A2	0.029678	1.52757	0.035843	0.715186	1019	2	-5.8206
HCAR3	0.029705	1.52717	0.035843	0.715186	1020	2	-7.2371
UBIAD1	0.029724	1.52689	0.035843	0.715186	1021	2	-6.0593
PRRG4	0.029836	1.52526	0.036543	0.715186	1022	2	-6.2542
IL4	0.029861	1.5249	0.036543	0.715186	1023	1	-7.2504
FNDC3A	0.029939	1.52376	0.036543	0.715186	1024	2	-7.213
KIF23	0.029998	1.52291	0.036543	0.715186	1025	1	-6.3091
IFITM1	0.030015	1.52266	0.036543	0.715186	1026	2	-7.3104
FUT5	0.030043	1.52226	0.036543	0.715186	1027	2	-8.0049
PBX4	0.030076	1.52178	0.036543	0.715186	1028	2	-8.191
HSD17B7	0.030099	1.52145	0.036543	0.715186	1029	2	-7.4279
RNF169	0.030122	1.52112	0.036681	0.715186	1030	2	-7.5491
PER1	0.030181	1.52027	0.036543	0.715186	1031	2	-7.579
R3HCC1L	0.030227	1.5196	0.036543	0.715186	1032	1	-6.9326
FAM9B	0.030231	1.51955	0.036543	0.715186	1033	2	-7.0516
ZNF532	0.030273	1.51894	0.036543	0.715186	1034	1	-7.6167
SEC16A	0.030318	1.5183	0.036543	0.715186	1035	1	-7.2411
AC006449.1	0.030364	1.51764	0.036543	0.715186	1036	1	-6.7095
SMIM10	0.03041	1.51698	0.036544	0.715186	1037	1	-5.8674
NLRP1	0.030448	1.51644	0.036544	0.715186	1038	2	-7.2321
RPL3L	0.030456	1.51633	0.036544	0.715186	1039	1	-8.1432
FCHSD1	0.030501	1.51569	0.036544	0.715186	1040	1	-7.1094
DCUN1D5	0.030524	1.51536	0.036544	0.715186	1041	2	-5.6624
TMEM67	0.030533	1.51523	0.036544	0.715186	1042	2	-6.0973
ZNF816	0.03057	1.5147	0.036544	0.715186	1043	1	-7.4916
NXPE1	0.030571	1.51469	0.036544	0.715186	1044	2	-6.6966
FREM2	0.030628	1.51388	0.036544	0.715186	1045	2	-7.2721
DNASE1	0.030637	1.51375	0.036544	0.715186	1046	2	-6.5276
PPM1A	0.030684	1.51309	0.036544	0.715186	1047	1	-6.9914
CAPN6	0.030913	1.50986	0.036544	0.715186	1048	1	-6.7835
RB1CC1	0.031037	1.50812	0.0367	0.715186	1049	2	-4.8539
CST6	0.03105	1.50794	0.0367	0.715186	1050	1	-7.3679
FAM115C	0.031091	1.50737	0.037398	0.720153	1051	2	-6.7255
AC040160.1	0.0311	1.50724	0.037398	0.720153	1052	2	-7.2131
PRKAR1A	0.031141	1.50667	0.036966	0.715186	1053	2	-6.4492
LPL	0.03118	1.50612	0.036966	0.715186	1054	2	-6.7362
NLRC3	0.031185	1.50605	0.037398	0.720153	1055	2	0.62952
LRPPRC	0.031187	1.50603	0.036966	0.715186	1056	1	-6.9381
IL23A	0.031227	1.50547	0.036966	0.715186	1057	2	-7.498
UBE2A	0.031233	1.50539	0.036966	0.715186	1058	1	-7.6096
AP5Z1	0.031237	1.50533	0.036966	0.715186	1059	2	-6.6033
HIF1A	0.031246	1.50521	0.036966	0.715186	1060	2	-7.3169
NAT8L	0.031266	1.50493	0.036966	0.715186	1061	2	-6.5608
PROZ	0.031279	1.50475	0.036966	0.715186	1062	1	-7.4007
PPCS	0.031304	1.5044	0.036966	0.715186	1063	2	-7.3153
USP35	0.031324	1.50412	0.036966	0.715186	1064	2	-6.5185
AREG	0.031393	1.50317	0.036966	0.715186	1065	1	-7.3176
AREGB	0.031393	1.50317	0.036966	0.715186	1066	1	-7.1472
C8orf86	0.031486	1.50188	0.037106	0.716539	1067	2	-6.9243
FAM86C1	0.0315	1.50169	0.037106	0.716539	1068	2	-6.1368
MRPL44	0.03163	1.4999	0.038508	0.737407	1069	2	-6.9824
YKT6	0.031658	1.49952	0.038296	0.736753	1070	2	-5.8981
THRA	0.031678	1.49924	0.038509	0.737407	1071	2	-7.6601
MYCBP2	0.03169	1.49908	0.038509	0.737407	1072	1	-7.1309
LAP3	0.031736	1.49845	0.038509	0.737407	1073	1	-7.1521
ERMAP	0.031745	1.49832	0.038509	0.737407	1074	2	-7.5369
EPOR	0.031779	1.49786	0.038641	0.738576	1075	2	-6.5605
TMPRSS11A	0.031827	1.4972	0.038642	0.738576	1076	1	-7.3649
CDH9	0.031909	1.49609	0.038771	0.739677	1077	2	-7.0598
MAGEA6	0.031928	1.49583	0.038771	0.739677	1078	2	-7.6548
DDA1	0.032056	1.49409	0.038899	0.740745	1079	1	-7.4955
SNX21	0.032082	1.49374	0.038899	0.740745	1080	2	-7.6986
CWF19L2	0.032111	1.49335	0.039037	0.74267	1081	2	-5.8372
LRRC41	0.032169	1.49256	0.039315	0.746583	1082	2	-7.3526
REN	0.032274	1.49115	0.03956	0.747425	1083	1	-5.9475
RAB3GAP2	0.032276	1.49112	0.039578	0.747425	1084	2	-6.356
SLC38A8	0.032284	1.49101	0.039578	0.747425	1085	1	-7.3901
OR52R1	0.03233	1.49039	0.039578	0.747425	1086	1	-7.0754
GUCA1A	0.032375	1.48979	0.039579	0.747425	1087	1	-7.2905
ANKRD20A4	0.0325	1.48812	0.039828	0.748565	1088	1	-6.5124
RASGEF1A	0.032513	1.48794	0.039722	0.747425	1089	2	-6.6427
LRRC37B	0.032538	1.48761	0.039722	0.747425	1090	2	-7.2914
TSC2	0.032558	1.48734	0.039722	0.747425	1091	2	-6.4189
ARMC10	0.032604	1.48673	0.039723	0.747425	1092	1	-7.5308
ANKRD44	0.032645	1.48618	0.039723	0.747425	1093	2	-7.1717
GPATCH3	0.032741	1.48491	0.039856	0.748565	1094	1	-6.2017
HS3ST5	0.032801	1.48411	0.040716	0.761679	1095	2	-7.4097
ZBTB11	0.032832	1.4837	0.040717	0.761679	1096	1	-7.1934
APOA1BP	0.032892	1.48291	0.040601	0.761679	1097	2	-6.1296
PFKL	0.032957	1.48205	0.040996	0.761679	1098	2	-7.2878
GOLGA8F	0.033006	1.48141	0.040996	0.761679	1099	2	-6.7249
ZNF695	0.03304	1.48096	0.041149	0.761679	1100	2	-6.6641
PIM2	0.03306	1.4807	0.041149	0.761679	1101	1	-7.7494
TRIM45	0.033106	1.48009	0.04115	0.761679	1102	1	-6.9103
NAMPTL	0.033172	1.47923	0.041846	0.761679	1103	2	-7.2392
MAGI3	0.033197	1.4789	0.041846	0.761679	1104	2	-7.0773
SLCO1C1	0.033243	1.4783	0.041846	0.761679	1105	1	-7.5426
ADRB3	0.03326	1.47808	0.041846	0.761679	1106	2	-7.8189
GXYLT1	0.03327	1.47795	0.041846	0.761679	1107	2	-7.3363
KCNV1	0.033334	1.47711	0.041846	0.761679	1108	1	-7.2991
C7orf61	0.033339	1.47705	0.043942	0.769187	1109	2	-7.1565
HOOK3	0.033516	1.47475	0.041847	0.761679	1110	1	-7.9109
DRG1	0.033538	1.47446	0.041993	0.761679	1111	2	-6.4124
C17orf97	0.03356	1.47418	0.041976	0.761679	1115	2	-6.3823
CLDN1	0.03356	1.47418	0.041976	0.761679	1114	2	-7.7324
F8A3	0.03356	1.47418	0.041976	0.761679	1116	2	-6.1857
GAGE2E	0.03356	1.47418	0.041976	0.761679	1112	2	-5.5591
PLCXD1	0.03356	1.47418	0.041976	0.761679	1113	2	-4.9579
SNN	0.033653	1.47298	0.042106	0.761679	1117	2	-7.6256
HSPA4	0.033744	1.4718	0.042106	0.761679	1118	1	-7.46
PIAS3	0.033773	1.47143	0.041874	0.761679	1119	2	-6.5124
PCDHA13	0.03379	1.47121	0.042107	0.761679	1120	1	-5.9594
RIOK2	0.033836	1.47062	0.042107	0.761679	1121	1	-7.1627
KIAA1009	0.033841	1.47056	0.042107	0.761679	1122	2	-6.8872
TIAM1	0.033881	1.47004	0.042107	0.761679	1123	1	-7.6955
SH2D3C	0.034109	1.46713	0.042253	0.761679	1124	1	-6.954
EMC8	0.034155	1.46655	0.042253	0.761679	1125	1	-7.4055
TRIP10	0.034162	1.46646	0.042955	0.761679	1126	2	-6.5083
GJB4	0.034177	1.46627	0.042253	0.761679	1127	2	-6.6969
PNMA5	0.034217	1.46576	0.042396	0.761679	1128	2	-7.5242
RPS6KB2	0.034296	1.46476	0.042396	0.761679	1129	2	-6.7798
ATP9B	0.034376	1.46374	0.042396	0.761679	1130	2	-7.4475
ITFG1	0.034383	1.46366	0.042396	0.761679	1131	1	-7.1575
TPSB2	0.034386	1.46362	0.042396	0.761679	1132	2	-7.7851
EXPH5	0.034395	1.4635	0.042396	0.761679	1133	2	-7.2893
SLC44A5	0.034405	1.46338	0.042396	0.761679	1134	2	-5.945
METTL21A	0.03444	1.46294	0.042808	0.761679	1135	2	-6.854
KCNK2	0.034455	1.46275	0.042396	0.761679	1136	2	-6.968
CSTF2T	0.034462	1.46266	0.042808	0.761679	1137	2	-6.2327
AP1G2	0.034505	1.46212	0.042396	0.761679	1138	2	-6.5205
SPATC1	0.034519	1.46194	0.042396	0.761679	1139	1	-7.6304
AF196779.12	0.03453	1.4618	0.042396	0.761679	1140	2	-7.7007
CANT1	0.034545	1.46161	0.042396	0.761679	1141	2	-7.7049
ACCS	0.034555	1.46149	0.042396	0.761679	1142	2	-7.8101
ZNF576	0.034611	1.46079	0.042396	0.761679	1143	1	-6.8678
ACTL6B	0.034614	1.46075	0.042396	0.761679	1144	2	-7.4804
OTC	0.034624	1.46062	0.042396	0.761679	1145	2	-6.8003
FAM168A	0.034753	1.45901	0.043206	0.761679	1146	2	-7.9206
UST	0.034776	1.45872	0.043222	0.761679	1147	1	-7.7199
ZNF205	0.034793	1.45851	0.043099	0.761679	1148	1	-6.6718
BTK	0.034861	1.45766	0.043099	0.761679	1149	1	-6.3646
GPALPP1	0.034861	1.45766	0.043099	0.761679	1150	1	-6.8013
HLA-DQB1	0.034864	1.45762	0.043099	0.761679	1151	2	-5.8961
CLVS2	0.034874	1.4575	0.043099	0.761679	1152	2	-4.1275
ARHGAP11B	0.034884	1.45737	0.043099	0.761679	1153	2	-7.2079
UNC119B	0.03493	1.4568	0.043099	0.761679	1154	1	-7.4332
PTGER1	0.034975	1.45624	0.043368	0.761679	1155	1	-7.7618
LYRM1	0.035054	1.45526	0.043368	0.761679	1156	2	-7.2839
SLC35C1	0.035066	1.45511	0.043368	0.761679	1157	1	-7.4096
RFC1	0.035084	1.45489	0.043368	0.761679	1158	2	-6.9768
MRPL18	0.035148	1.4541	0.04336	0.761679	1159	1	-7.282
TREML2	0.035157	1.45399	0.043368	0.761679	1160	1	-7.1306
RAB36	0.035166	1.45388	0.04336	0.761679	1161	2	-6.972
SNX30	0.035179	1.45372	0.043368	0.761679	1162	2	-5.6813
PFKM	0.035203	1.45342	0.043368	0.761679	1163	1	-7.8963
GP9	0.035248	1.45287	0.043368	0.761679	1164	1	-7.3
KCNB1	0.035294	1.4523	0.043368	0.761679	1165	1	-7.5647
METTL14	0.035339	1.45175	0.043369	0.761679	1166	1	-7.4255
KIAA1958	0.035405	1.45094	0.043369	0.761679	1167	2	-7.461
PPP2R3A	0.035476	1.45007	0.043369	0.761679	1168	1	-7.4266
TGM2	0.035567	1.44895	0.043369	0.761679	1169	1	-7.6405
DPY30	0.035577	1.44883	0.043369	0.761679	1170	2	-7.414
CCDC71	0.035658	1.44784	0.043369	0.761679	1171	1	-7.0041
SCN11A	0.035749	1.44674	0.044187	0.769187	1172	1	-7.3296
GNPDA2	0.035778	1.44638	0.044187	0.769187	1173	2	-6.8326
CYP2A7	0.035886	1.44507	0.044329	0.769187	1174	2	-7.9158
FOXO4	0.035931	1.44453	0.044329	0.769187	1175	1	-5.6736
CDRT4	0.035935	1.44448	0.044329	0.769187	1176	2	-6.819
ATMIN	0.035966	1.44411	0.044329	0.769187	1177	2	-7.213
AGO1	0.035977	1.44398	0.04433	0.769187	1178	1	-7.002
MYH4	0.036031	1.44332	0.04433	0.769187	1179	2	-6.5878
C16orf58	0.036041	1.4432	0.04433	0.769187	1180	2	-7.8225
ANKRD20A2	0.036045	1.44315	0.04433	0.769187	1181	1	-6.0861
SLC26A8	0.036052	1.44307	0.04433	0.769187	1182	2	-7.028
ZSWIM3	0.036062	1.44295	0.04433	0.769187	1183	2	-7.0642
GLE1	0.036113	1.44234	0.04433	0.769187	1184	1	-7.1669
CDCA2	0.036159	1.44178	0.044474	0.769187	1185	1	-7.2051
ATG4B	0.036173	1.44162	0.044934	0.769187	1186	1	-7.0866
C11orf82	0.036254	1.44064	0.045067	0.769187	1187	2	-7.0866
CUX2	0.036295	1.44015	0.045435	0.769187	1188	1	-6.5643
CPD	0.036341	1.4396	0.045435	0.769187	1189	1	-7.3027
REG1B	0.036386	1.43907	0.045435	0.769187	1190	1	-7.5082
ISOC2	0.036417	1.4387	0.045436	0.769187	1191	2	-7.5269
C12orf44	0.036432	1.43852	0.045436	0.769187	1192	1	-7.1875
ZNF530	0.036488	1.43785	0.045436	0.769187	1193	2	-5.3402
CBLC	0.03658	1.43676	0.045588	0.769187	1194	2	-6.9589
OR1A2	0.036641	1.43603	0.045588	0.769187	1195	2	-7.0369
ASB12	0.036659	1.43582	0.045588	0.769187	1196	1	-7.6839
RAVER1	0.036703	1.4353	0.045589	0.769187	1197	2	-6.6822
ABCA1	0.036705	1.43527	0.045589	0.769187	1198	2	-6.8658
FAM71F1	0.036723	1.43506	0.045589	0.769187	1199	2	-6.8224
YOD1	0.036764	1.43458	0.045589	0.769187	1200	2	-6.8891
GJC2	0.036774	1.43446	0.045589	0.769187	1201	2	-8.1301
PTGER4	0.036784	1.43434	0.045589	0.769187	1202	2	-7.1451
BRINP2	0.036869	1.43334	0.045908	0.769187	1203	1	-6.1924
GALK1	0.036887	1.43313	0.045727	0.769187	1204	1	-7.0575
ZRANB2	0.036958	1.43229	0.045727	0.769187	1205	2	-5.6203
ANTXRL	0.037023	1.43153	0.045728	0.769187	1206	1	-7.223
CCDC8	0.03703	1.43145	0.045728	0.769187	1207	2	-7.8369
MPI	0.037071	1.43097	0.045728	0.769187	1208	2	-7.713
FBXO10	0.037091	1.43073	0.045728	0.769187	1209	2	-7.1018
C11orf87	0.037122	1.43037	0.045728	0.769187	1210	2	-7.3489
SHC4	0.037153	1.43001	0.045871	0.769187	1211	2	-7.1442
FOXB2	0.037235	1.42905	0.046588	0.769187	1212	2	-7.4644
C21orf37	0.037252	1.42885	0.047327	0.769187	1213	2	-4.3446
HIATL2	0.037255	1.42882	0.046588	0.769187	1214	2	-6.7357
DYNAP	0.037296	1.42834	0.046588	0.769187	1215	1	-7.4865
SRP14	0.03743	1.42678	0.046588	0.769187	1216	2	-6.5462
HPS5	0.037432	1.42676	0.046588	0.769187	1217	2	-7.9172
ALDH1A2	0.037461	1.42642	0.046588	0.769187	1218	2	-7.5043
SH3BP4	0.037478	1.42622	0.046588	0.769187	1219	1	-7.1948
EPHA7	0.037482	1.42618	0.046588	0.769187	1220	2	-7.1157
SPTAN1	0.037523	1.4257	0.046588	0.769187	1221	2	-6.8035
ANGPTL7	0.037533	1.42559	0.046588	0.769187	1222	2	-6.5171
USP28	0.037621	1.42457	0.046882	0.769187	1223	2	-7.7791
ANPEP	0.037636	1.4244	0.046882	0.769187	1224	2	-7.0549
HECW2	0.037657	1.42415	0.046882	0.769187	1225	2	-7.3744
NFE2L3	0.03766	1.42412	0.046882	0.769187	1226	1	-6.9494
RCOR3	0.037705	1.4236	0.046883	0.769187	1227	1	-7.5367
LDOC1	0.037708	1.42357	0.046883	0.769187	1228	2	-7.4976
LASP1	0.037739	1.42321	0.046883	0.769187	1229	2	-7.2457
CATSPER1	0.03775	1.42308	0.046883	0.769187	1230	1	-7.0941
CDK13	0.037796	1.42255	0.047027	0.769187	1231	1	-7.1208
FAM156A	0.037837	1.42208	0.047155	0.769187	1233	2	-7.9797
FAM156B	0.037837	1.42208	0.047155	0.769187	1232	2	-7.1189
ADCYAP1R1	0.037887	1.42151	0.047155	0.769187	1234	1	-7.6591
NOTO	0.037932	1.42099	0.047155	0.769187	1235	1	-6.182
FLJ00104	0.037987	1.42037	0.047155	0.769187	1236	2	-6.7727
P2RX2	0.038023	1.41995	0.047296	0.769187	1237	2	-6.2736
PCSK1	0.038068	1.41944	0.047296	0.769187	1238	1	-7.5065
CALHM1	0.038132	1.41871	0.047296	0.769187	1239	2	-7.6462
CHMP6	0.038159	1.4184	0.047296	0.769187	1240	2	-5.932
APEX1	0.038164	1.41835	0.047296	0.769187	1241	2	-6.2861
BRD3	0.038198	1.41796	0.047372	0.769187	1242	2	-7.6827
HEY2	0.03825	1.41737	0.047297	0.769187	1243	1	-7.6382
ADCY9	0.038257	1.41729	0.047297	0.769187	1244	2	-7.4338
CLK3	0.038288	1.41694	0.047297	0.769187	1245	2	-7.5281
ALKBH8	0.038298	1.41682	0.047297	0.769187	1246	2	-6.9313
GFM1	0.038341	1.41634	0.047297	0.769187	1247	1	-7.0469
CTD-2616J11.11	0.038361	1.41611	0.047444	0.769187	1248	2	-8.1029
F8	0.038432	1.41531	0.047444	0.769187	1249	1	-7.4135
TSC22D2	0.038433	1.4153	0.047444	0.769187	1250	2	-6.6836
VPS36	0.038465	1.41493	0.047444	0.769187	1251	2	-7.1961
AOC1	0.038477	1.4148	0.047444	0.769187	1252	1	-7.761
DMWD	0.038486	1.4147	0.047444	0.769187	1253	2	-7.3056
YWHAE	0.038523	1.41428	0.047444	0.769187	1254	1	-6.8401
MGAT5	0.038568	1.41377	0.047444	0.769187	1255	1	-7.7786
SMAD3	0.0386	1.41341	0.047588	0.769187	1256	2	-6.413
DNAJC25	0.038631	1.41306	0.047588	0.769187	1257	2	-7.4391
SPOCK1	0.038659	1.41275	0.047588	0.769187	1258	1	-7.7119
CT47A12	0.038704	1.41224	0.047588	0.769187	1259	1	-5.503
LRRC28	0.038704	1.41224	0.047588	0.769187	1260	2	-6.906
UBALD2	0.038715	1.41212	0.047588	0.769187	1261	2	-7.0167
MGMT	0.038829	1.41084	0.047589	0.769187	1262	2	-7.0345
RNF181	0.03884	1.41072	0.047589	0.769187	1263	1	-6.4084
XAGE3	0.038871	1.41037	0.047589	0.769187	1264	2	-7.6934
MRGPRF	0.038903	1.41002	0.047726	0.769187	1265	2	-7.6926
PML	0.039007	1.40886	0.047869	0.769187	1266	2	-6.6285
STRA8	0.039018	1.40873	0.047869	0.769187	1267	2	-7.1543
GPRC5B	0.039078	1.40807	0.048359	0.769187	1268	1	-7.6532
CLCA4	0.039113	1.40768	0.047869	0.769187	1269	1	-7.1493
AC114494.1	0.039122	1.40758	0.047869	0.769187	1270	2	-6.8115
HDAC10	0.039143	1.40735	0.048016	0.769187	1271	2	-7.3521
RAB15	0.039158	1.40718	0.048017	0.769187	1272	1	-7.8457
SLC16A11	0.0392	1.40671	0.048359	0.769187	1273	2	-7.1246
PNMAL1	0.039203	1.40668	0.048175	0.769187	1274	1	-7.3532
TCEB3B	0.039241	1.40626	0.048359	0.769187	1275	1	-6.6152
RFX5	0.039249	1.40617	0.048331	0.769187	1276	1	-7.0567
C22orf15	0.039294	1.40567	0.048331	0.769187	1277	1	-7.8424
UTP14A	0.039311	1.40549	0.048331	0.769187	1278	2	-6.671
CTC-435M10.3	0.039358	1.40497	0.048331	0.769187	1279	2	-7.0426
PITX2	0.03936	1.40494	0.048503	0.769296	1280	2	-6.7465
E2F5	0.039364	1.4049	0.048503	0.769296	1281	1	-6.8344
SH3RF3	0.039374	1.40479	0.048331	0.769187	1282	2	-7.7924
AANAT	0.039385	1.40467	0.048331	0.769187	1283	2	-6.3558
KIAA0754	0.039385	1.40467	0.048331	0.769187	1284	1	-6.9489
WBP5	0.039395	1.40456	0.048331	0.769187	1285	2	-5.7131
BBS9	0.039406	1.40444	0.048331	0.769187	1286	2	-6.9507
CCBL1	0.039416	1.40433	0.048331	0.769187	1287	2	-6.0456
CBWD5	0.03943	1.40417	0.048331	0.769187	1288	1	-6.5545
FCN3	0.039476	1.40367	0.048331	0.769187	1289	1	-6.9979
MAP1A	0.03949	1.40351	0.048331	0.769187	1290	2	-6.9287
CTSB	0.039521	1.40317	0.048331	0.769187	1291	2	-7.2953
FLYWCH1	0.039553	1.40282	0.048331	0.769187	1292	2	-6.8818
JMJD7	0.039637	1.4019	0.048628	0.769296	1293	2	-7.064
LY6G5C	0.039702	1.40119	0.048628	0.769296	1294	1	-6.9027
SYTL3	0.039732	1.40086	0.048628	0.769296	1295	2	-7.524
NACC2	0.039748	1.40068	0.048628	0.769296	1296	1	-7.3826
PDE4A	0.039753	1.40063	0.048628	0.769296	1297	2	-7.2281
GABRA6	0.039854	1.39953	0.049432	0.771336	1298	1	-7.8314
ZNF136	0.039879	1.39926	0.049318	0.771336	1299	2	-6.9374
KAT8	0.0399	1.39903	0.049319	0.771336	1300	2	-7.0136
ABCA6	0.040006	1.39787	0.049461	0.771336	1301	2	-7.1549
C1GALT1	0.040017	1.39776	0.049461	0.771336	1302	2	-6.5468
HOXA1	0.040058	1.39731	0.049735	0.771336	1303	1	-7.8215
ENKUR	0.040065	1.39723	0.049461	0.771336	1304	1	-7.6103
XPR1	0.040069	1.39719	0.049461	0.771336	1305	2	-5.9601
CD200	0.040091	1.39695	0.049461	0.771336	1306	2	-7.2352
GSDMD	0.040156	1.39625	0.049461	0.771336	1307	1	-7.6223
C16orf96	0.040196	1.39582	0.049462	0.771336	1308	2	-7.6136
ADAMTS5	0.040201	1.39576	0.049462	0.771336	1309	1	-7.3441
PRKCE	0.04026	1.39513	0.049462	0.771336	1310	2	-6.9977
AMOTL1	0.040334	1.39433	0.049462	0.771336	1311	2	-3.1897
MED28	0.040337	1.3943	0.049462	0.771336	1312	1	-7.0607
WDR47	0.040377	1.39387	0.049613	0.771336	1313	2	-6.4566
SNX24	0.040385	1.39378	0.049882	0.771336	1314	1	-7.5768
CHPF2	0.040387	1.39376	0.049613	0.771336	1315	2	-7.3454
PGM2	0.040451	1.39307	0.049613	0.771336	1316	2	-7.4714
CHRNA9	0.040473	1.39283	0.049613	0.771336	1317	1	-6.4398
CYP27C1	0.040519	1.39234	0.049613	0.771336	1318	1	-7.5709
SEC61A2	0.040642	1.39102	0.049919	0.771336	1319	2	-7.0909
YWHAG	0.040653	1.39091	0.049919	0.771336	1320	2	-7.035
APLF	0.040674	1.39068	0.050793	0.773147	1321	2	-7.5847
EMC10	0.040685	1.39057	0.049919	0.771336	1322	2	-6.4917
FRMPD3	0.040695	1.39046	0.049919	0.771336	1323	2	-6.6782
SNX33	0.040711	1.39029	0.050793	0.773147	1324	1	-6.7325
GOLGA6C	0.040727	1.39012	0.04992	0.771336	1325	2	-0.79488
KCNJ13	0.040738	1.39	0.04992	0.771336	1326	2	-7.0909
SLC25A53	0.04077	1.38966	0.04992	0.771336	1327	2	-7.4832
SNURF	0.040783	1.38952	0.061779	0.806968	1328	2	-6.9479
SLC11A1	0.04079	1.38945	0.04992	0.771336	1329	1	-7.4559
PCDH19	0.040812	1.38921	0.04992	0.771336	1330	2	-7.4171
RANBP3	0.040836	1.38896	0.04992	0.771336	1331	1	-7.6149
PRDM4	0.040876	1.38853	0.050074	0.772563	1332	2	-6.7793
CENPU	0.040926	1.388	0.050074	0.772563	1333	1	-6.9016
GPR4	0.040985	1.38738	0.051238	0.773147	1334	2	-7.8639
MBIP	0.041243	1.38465	0.050748	0.773147	1335	1	-7.3411
PNLIPRP3	0.041289	1.38417	0.050748	0.773147	1336	1	-6.8136
DSN1	0.041304	1.38401	0.050898	0.773147	1341	2	-7.3794
GLB1L	0.041304	1.38401	0.050898	0.773147	1343	2	-7.3608
IL17REL	0.041304	1.38401	0.050898	0.773147	1344	2	-7.1583
IRX4	0.041304	1.38401	0.050898	0.773147	1340	2	-7.8171
NPSR1	0.041304	1.38401	0.050898	0.773147	1337	2	-6.766
PIP	0.041304	1.38401	0.050898	0.773147	1339	2	-6.8813
POLR1C	0.041304	1.38401	0.050898	0.773147	1338	2	-6.6688
ZNF710	0.041304	1.38401	0.050898	0.773147	1342	2	-6.9357
FAXDC2	0.041334	1.38369	0.051048	0.773147	1345	1	-7.7466
PNPLA2	0.041379	1.38322	0.051048	0.773147	1346	2	-6.4398
NPM2	0.041425	1.38274	0.051048	0.773147	1347	2	-6.3255
C2orf83	0.04147	1.38227	0.051048	0.773147	1348	1	-8.0915
GPR50	0.041523	1.38171	0.05138	0.773147	1349	2	-6.966
KIF1C	0.041538	1.38155	0.051048	0.773147	1350	1	-7.9173
OCLM	0.041583	1.38108	0.03539	0.715186	1351	1	-5.4273
CT47A1	0.041651	1.38037	0.051048	0.773147	1352	1	-5.6413
HFE	0.041687	1.38	0.051548	0.773147	1353	2	-6.7184
FXR1	0.041696	1.37991	0.051048	0.773147	1354	1	-7.9503
OR14A16	0.041716	1.3797	0.051548	0.773147	1355	2	-6.8213
SSR1	0.041722	1.37963	0.051048	0.773147	1356	2	-6.4771
KCNV2	0.041786	1.37897	0.051048	0.773147	1357	2	-7.1452
NRBP1	0.041829	1.37852	0.051204	0.773147	1358	2	-7.3975
RPL10L	0.041856	1.37824	0.052172	0.773147	1359	2	-6.8279
ADAM18	0.041909	1.37769	0.052322	0.773147	1360	2	-6.9956
MAP3K19	0.041923	1.37755	0.051371	0.773147	1361	1	-7.3363
GAGE2A	0.042002	1.37673	0.051507	0.773147	1362	2	-5.5017
FKBP2	0.042056	1.37617	0.051826	0.773147	1363	2	-7.0941
DCAF16	0.042058	1.37615	0.051826	0.773147	1364	1	-6.3623
FBXW10	0.042077	1.37596	0.051993	0.773147	1365	2	-7.7344
EIF4G3	0.042104	1.37568	0.051993	0.773147	1366	2	-7.5648
UHRF1BP1	0.042153	1.37517	0.051993	0.773147	1367	2	-6.885
OR4M1	0.042194	1.37475	0.051993	0.773147	1368	1	-7.7332
DAGLA	0.042201	1.37468	0.051993	0.773147	1369	2	-7.2333
IFFO2	0.042214	1.37454	0.052796	0.773147	1370	2	-7.8314
SHISA3	0.04233	1.37335	0.052298	0.773147	1371	1	-7.3747
UFSP1	0.042369	1.37295	0.052299	0.773147	1372	2	-7.383
KIAA1614	0.042375	1.37289	0.052299	0.773147	1373	1	-7.7769
C11orf49	0.04238	1.37284	0.052299	0.773147	1374	2	-8.1497
FGF9	0.04242	1.37243	0.052439	0.773147	1375	1	-7.6879
LPAR4	0.042423	1.3724	0.052439	0.773147	1376	2	-7.4436
LRRIQ3	0.042465	1.37197	0.052439	0.773147	1377	1	-5.9053
PMP2	0.042511	1.3715	0.052439	0.773147	1378	1	-6.8319
C5orf48	0.04252	1.37141	0.052439	0.773147	1379	2	-8.0469
GPR64	0.042542	1.37118	0.052439	0.773147	1380	2	-6.712
DIXDC1	0.042556	1.37104	0.052439	0.773147	1381	1	-7.801
USP21	0.042564	1.37096	0.052439	0.773147	1382	2	-6.6244
AMOT	0.042601	1.37058	0.052593	0.773147	1383	2	-6.9923
PHLDB2	0.042618	1.37041	0.052593	0.773147	1384	2	-7.5087
TMEM25	0.042629	1.37029	0.052593	0.773147	1385	2	-7.0099
ARHGAP28	0.042646	1.37012	0.052593	0.773147	1386	1	-8.0964
PDZD9	0.042666	1.36992	0.052593	0.773147	1387	2	-7.9722
KALRN	0.042692	1.36965	0.052593	0.773147	1388	1	-7.2009
KIF1B	0.042694	1.36963	0.052593	0.773147	1389	2	-7.1311
C2orf78	0.042737	1.3692	0.052593	0.773147	1390	1	-6.9392
PCOLCE2	0.042748	1.36908	0.052593	0.773147	1391	2	-6.9628
RIN3	0.042782	1.36874	0.052593	0.773147	1392	2	-6.3318
CDHR2	0.042827	1.36828	0.052593	0.773147	1393	1	-6.9353
AVEN	0.042873	1.36782	0.052593	0.773147	1394	1	-6.9988
COLEC11	0.042922	1.36732	0.052593	0.773147	1395	2	-6.8863
DDR2	0.042954	1.367	0.052593	0.773147	1396	2	-7.4559
HIST1H2BD	0.043008	1.36645	0.052593	0.773147	1397	2	-6.5428
HNRNPR	0.043022	1.36631	0.054307	0.784888	1398	2	-6.1402
ALG14	0.043056	1.36597	0.054308	0.784888	1399	2	-7.3752
APC2	0.043085	1.36567	0.052934	0.773147	1400	2	-7.4666
MICAL3	0.043116	1.36536	0.054308	0.784888	1401	1	-6.9898
CSGALNACT1	0.04315	1.36502	0.052934	0.773147	1402	2	-7.4566
MAGED2	0.043189	1.36463	0.052934	0.773147	1403	1	-7.2327
AC019294.1	0.043194	1.36458	0.052934	0.773147	1404	2	-6.9675
RP11-434D12.1	0.043197	1.36455	0.054308	0.784888	1405	1	-6.2327
GAGE12F	0.043212	1.3644	0.054308	0.784888	1406	2	-4.4774
MUC3A	0.043255	1.36396	0.064068	0.812342	1407	1	-7.2338
ITIH3	0.043259	1.36392	0.052934	0.773147	1408	2	-7.0503
SHCBP1L	0.043292	1.36359	0.052934	0.773147	1409	2	-7.1269
CCL23	0.04337	1.36281	0.052935	0.773147	1410	1	-6.9822
CADPS2	0.043415	1.36236	0.052935	0.773147	1411	1	-7.5635
CLASP2	0.043521	1.3613	0.052935	0.773147	1412	2	-7.2693
WNT1	0.043543	1.36108	0.052935	0.773147	1413	2	-7.5519
KNTC1	0.043597	1.36054	0.0531	0.773147	1414	2	-6.5446
COL19A1	0.043614	1.36037	0.0531	0.773147	1415	2	-7.1184
RBFOX2	0.043794	1.35859	0.053269	0.773147	1416	2	-7.2119
AL117190.3	0.043822	1.35831	0.053269	0.773147	1417	1	-7.0044
LTN1	0.043848	1.35805	0.055367	0.788325	1418	1	-7.208
PLEKHM3	0.043849	1.35804	0.05327	0.773147	1419	2	-7.4339
LEMD2	0.043867	1.35786	0.05327	0.773147	1420	1	-7.0498
IGHG3	0.043912	1.35742	0.05327	0.773147	1421	1	-6.8156
OLIG1	0.043957	1.35697	0.05327	0.773147	1422	1	-7.6174
CHCHD2	0.043959	1.35695	0.05327	0.773147	1423	2	-7.1331
TTLL3	0.044133	1.35524	0.055825	0.788325	1424	1	-6.9839
EID3	0.044138	1.35519	0.054452	0.785878	1425	1	-7.8651
IGHG1	0.044228	1.3543	0.054453	0.785878	1426	1	-6.8705
UBE2W	0.044296	1.35364	0.057229	0.788325	1427	1	-6.886
ZNF586	0.044319	1.35341	0.054752	0.787995	1428	1	-7.0407
CST1	0.044366	1.35295	0.054752	0.787995	1429	2	-7.4666
TMEM30B	0.044418	1.35244	0.05738	0.788325	1430	1	-7.6863
WDR45	0.044477	1.35186	0.054753	0.787995	1431	1	-7.4628
PTPRC	0.044544	1.35121	0.054906	0.788006	1432	2	-5.9913
CCDC7	0.04458	1.35086	0.05738	0.788325	1433	1	-6.9479
BMPER	0.04459	1.35076	0.054907	0.788006	1434	1	-7.7929
OR2A1	0.044592	1.35074	0.054907	0.788006	1435	2	-7.7419
OR2A42	0.044592	1.35074	0.054907	0.788006	1436	2	-7.1706
NAGPA	0.04468	1.34989	0.055085	0.788325	1437	1	-6.5056
SNPH	0.044685	1.34984	0.055085	0.788325	1438	2	-7.3152
PDK1	0.044796	1.34876	0.05526	0.788325	1439	2	-6.5759
GOT1	0.04484	1.34833	0.055432	0.788325	1440	2	-6.4444
ALDH3B2	0.044857	1.34817	0.055432	0.788325	1441	2	-6.3065
ARFIP2	0.044873	1.34801	0.055432	0.788325	1442	2	-6.4
TREX1	0.044906	1.3477	0.055432	0.788325	1443	1	-6.3378
TIMM13	0.044951	1.34726	0.056245	0.788325	1444	2	-7.2029
IL9	0.044996	1.34683	0.056245	0.788325	1445	1	-7.2227
TMPRSS4	0.045028	1.34652	0.056245	0.788325	1446	2	-6.1773
NT5DC1	0.045041	1.34639	0.056245	0.788325	1447	1	-6.7212
CLPB	0.045086	1.34596	0.056245	0.788325	1448	1	-6.7675
MTMR1	0.045117	1.34566	0.056245	0.788325	1449	2	-5.5635
MAPKBP1	0.045176	1.34509	0.056245	0.788325	1450	1	-6.226
SOHLH2	0.045183	1.34502	0.056245	0.788325	1451	2	-7.5683
KIAA1432	0.045267	1.34422	0.056413	0.788325	1452	2	-7.4643
GNPDA1	0.045294	1.34396	0.056413	0.788325	1453	2	-7.3569
ELOVL1	0.045312	1.34379	0.057875	0.788325	1455	1	-6.8279
GATA5	0.045312	1.34379	0.056413	0.788325	1454	1	-7.1218
COL6A3	0.04535	1.34342	0.056413	0.788325	1456	2	-7.4369
OR4P4	0.045357	1.34336	0.056413	0.788325	1457	2	-4.8243
ARSA	0.045361	1.34332	0.056413	0.788325	1458	2	-6.9708
NUDT2	0.045402	1.34293	0.056413	0.788325	1459	1	-7.6527
FGD2	0.045461	1.34236	0.056413	0.788325	1460	2	-7.3241
BTG3	0.045483	1.34215	0.056413	0.788325	1461	2	-6.6627
TRBV10-1	0.045492	1.34206	0.056413	0.788325	1462	1	-6.1815
HIST1H2AL	0.045582	1.34121	0.056413	0.788325	1463	1	-5.6684
TBC1D24	0.045617	1.34087	0.056413	0.788325	1464	2	-7.5993
C8A	0.045627	1.34078	0.056413	0.788325	1465	1	-7.3106
ASB10	0.045639	1.34066	0.056413	0.788325	1466	2	-6.2327
ALDH3A2	0.04565	1.34056	0.056413	0.788325	1467	2	-7.8099
TRAJ37	0.045664	1.34043	0.039253	0.746102	1468	1	-2.2668
TFPI2	0.045706	1.34003	0.056747	0.788325	1469	2	-7.8639
LAT	0.045717	1.33992	0.056747	0.788325	1470	2	-6.7717
TMEM260	0.045728	1.33982	0.056747	0.788325	1471	2	-6.429
BEGAIN	0.045756	1.33955	0.059116	0.800019	1472	2	-4.6434
PTPRCAP	0.045759	1.33952	0.059116	0.800019	1473	1	-7.1825
LNX1	0.045763	1.33949	0.056747	0.788325	1474	1	-7.6681
KIAA0087	0.045808	1.33906	0.056747	0.788325	1475	1	-7.4855
CYB5D1	0.045862	1.33855	0.056747	0.788325	1476	2	-6.8456
C11orf70	0.04589	1.33828	0.056747	0.788325	1477	2	-7.078
OAS2	0.045943	1.33778	0.056747	0.788325	1478	1	-7.3266
TRPC5	0.045973	1.3375	0.056747	0.788325	1479	2	-6.4718
PP2D1	0.045985	1.33738	0.056747	0.788325	1480	2	-7.6734
FUT4	0.046078	1.33651	0.056747	0.788325	1481	1	-7.0616
KIAA1456	0.046108	1.33622	0.056902	0.788325	1482	2	-7.2325
ARX	0.046141	1.33591	0.056902	0.788325	1483	2	-7.1186
MARS2	0.046214	1.33523	0.056903	0.788325	1484	1	-7.5634
SLC30A8	0.046231	1.33507	0.056903	0.788325	1485	2	-6.5287
ACSS1	0.046264	1.33476	0.057071	0.788325	1486	2	-7.8554
ARPC3	0.046286	1.33455	0.061078	0.806968	1487	1	-7.0976
LRRC56	0.046298	1.33444	0.057072	0.788325	1488	2	-6.2008
PRR25	0.046342	1.33403	0.057726	0.788325	1489	2	-7.0317
IL2RA	0.046394	1.33354	0.057726	0.788325	1490	1	-7.5487
NUMA1	0.046399	1.33349	0.057726	0.788325	1491	2	-7.4412
PPP5C	0.046439	1.33312	0.057726	0.788325	1492	1	-6.9184
SNRPG	0.046489	1.33265	0.061697	0.806968	1493	1	-6.0972
SOX6	0.046529	1.33228	0.05788	0.788325	1494	1	-7.316
DAPP1	0.046574	1.33186	0.05788	0.788325	1495	1	-7.0861
INPP1	0.046612	1.3315	0.05788	0.788325	1496	2	-6.255
RIMS1	0.046619	1.33144	0.05788	0.788325	1497	1	-7.3667
SFXN4	0.046634	1.3313	0.05788	0.788325	1498	2	-7.4465
OR11H6	0.046661	1.33105	0.061771	0.806968	1499	2	-7.0866
SPESP1	0.046661	1.33105	0.061771	0.806968	1500	2	-6.9419
PUS10	0.046664	1.33102	0.05788	0.788325	1501	1	-5.9981
GPR27	0.046679	1.33088	0.05788	0.788325	1502	2	-6.9731
C6orf47	0.046709	1.3306	0.057881	0.788325	1503	2	-7.6888
CCL24	0.046754	1.33018	0.057881	0.788325	1504	1	-7.6622
IPCEF1	0.046758	1.33014	0.057881	0.788325	1505	2	-7.3826
C8orf46	0.046769	1.33004	0.057881	0.788325	1506	2	-7.5469
GABPB2	0.046799	1.32976	0.057881	0.788325	1507	1	-7.3886
POU1F1	0.046803	1.32973	0.057881	0.788325	1508	2	-7.7656
RP11-368I7.4	0.046814	1.32962	0.061845	0.806968	1509	1	-7.7778
AC007919.2	0.046836	1.32942	0.057881	0.788325	1510	2	-6.7624
HEMK1	0.046848	1.32931	0.057881	0.788325	1511	2	-7.2832
FASN	0.04687	1.32911	0.057881	0.788325	1512	2	-6.9629
TERF2	0.04689	1.32892	0.057881	0.788325	1513	1	-5.9554
ARL6IP5	0.046904	1.32879	0.057881	0.788325	1514	2	-6.9467
FAM69A	0.046935	1.3285	0.057881	0.788325	1515	1	-6.4061
AIPL1	0.046936	1.32849	0.061845	0.806968	1516	1	-7.7468
CD300E	0.047025	1.32767	0.058219	0.792417	1517	1	-7.522
NFYC	0.047062	1.32733	0.058375	0.793483	1518	2	-6.1717
KLHL33	0.04716	1.32643	0.059043	0.800019	1519	1	-7.3911
CNN1	0.047332	1.32485	0.059044	0.800019	1520	2	-6.0575
ORAI1	0.047385	1.32436	0.059205	0.800019	1521	1	-8.0026
PIGL	0.047445	1.32381	0.059205	0.800019	1522	2	-7.6741
NKX6-1	0.047468	1.3236	0.059205	0.800019	1523	2	-6.2456
TESPA1	0.047475	1.32354	0.059206	0.800019	1524	1	-6.7424
TIGD6	0.047479	1.3235	0.059206	0.800019	1525	2	-6.4494
GFAP	0.04761	1.3223	0.059379	0.801202	1526	1	-6.804
PEX19	0.047621	1.3222	0.059379	0.801202	1527	2	-7.1959
PRPSAP2	0.047655	1.32189	0.059722	0.801202	1528	1	-6.9922
RFX1	0.047694	1.32154	0.059722	0.801202	1529	2	-6.9379
C3orf72	0.0477	1.32148	0.059722	0.801202	1530	1	-8.3605
SDCBP2	0.047717	1.32133	0.059722	0.801202	1531	2	-7.6881
PRRX1	0.047728	1.32123	0.059722	0.801202	1532	2	-7.3834
SERPINE3	0.047819	1.3204	0.059722	0.801202	1533	2	-6.8739
MAGT1	0.047847	1.32015	0.063055	0.80747	1534	2	-7.0361
GIF	0.047925	1.31944	0.059722	0.801202	1535	1	-7.7116
FBXO44	0.047944	1.31927	0.059722	0.801202	1536	2	-7.5216
ANKRD30B	0.047978	1.31896	0.059722	0.801202	1537	2	-6.4707
IL36RN	0.048	1.31876	0.063216	0.808014	1538	2	-7.0588
PAQR3	0.048057	1.31824	0.059901	0.802041	1539	2	-7.4318
ARFGEF1	0.04806	1.31822	0.059902	0.802041	1540	1	-7.9263
HLA-DQB2	0.048069	1.31813	0.059902	0.802041	1541	2	-7.7369
EMC7	0.04815	1.3174	0.06093	0.806968	1542	1	-6.2405
IQCJ	0.048163	1.31729	0.063445	0.810436	1543	2	-6.4538
GSTO2	0.04824	1.31659	0.06093	0.806968	1544	1	-7.6031
EGR4	0.048285	1.31619	0.06093	0.806968	1545	1	-7.44
PLXNA4	0.04833	1.31578	0.06093	0.806968	1546	1	-7.3973
AATK	0.048354	1.31557	0.063849	0.812342	1547	2	-7.2772
BLK	0.04851	1.31417	0.060931	0.806968	1548	1	-7.9371
CYB5R1	0.048555	1.31377	0.060931	0.806968	1549	1	-7.0582
ABHD16B	0.048644	1.31297	0.061103	0.806968	1556	2	-6.8815
FUBP3	0.048644	1.31297	0.061103	0.806968	1558	2	-6.944
GAGE13	0.048644	1.31297	0.061103	0.806968	1555	2	-3.263
GAGE2D	0.048644	1.31297	0.061103	0.806968	1554	2	-5.542
HMGB2	0.048644	1.31297	0.061103	0.806968	1553	2	-6.0286
RP11-10A14.4	0.048644	1.31297	0.061103	0.806968	1552	2	-6.4624
SLC15A4	0.048644	1.31297	0.061103	0.806968	1550	2	-7.1743
TBCCD1	0.048644	1.31297	0.061103	0.806968	1551	2	-6.9838
WDR34	0.048644	1.31297	0.061103	0.806968	1557	2	-7.2505
NUAK1	0.048645	1.31296	0.061276	0.806968	1559	1	-7.4573
MYH2	0.048735	1.31216	0.061276	0.806968	1560	1	-7.4665
PQLC2	0.048759	1.31195	0.065215	0.82587	1561	1	-7.13
ZYG11B	0.04878	1.31176	0.061276	0.806968	1562	1	-7.0348
SPSB3	0.04887	1.31096	0.061277	0.806968	1563	1	-7.2737
LCN10	0.04896	1.31016	0.061277	0.806968	1564	1	-7.2548
GRIA2	0.049005	1.30976	0.061277	0.806968	1565	1	-7.6484
ID1	0.049185	1.30817	0.061913	0.806968	1566	1	-7.3568
AC105020.1	0.049198	1.30805	0.061913	0.806968	1567	2	-6.8946
PPP1R14B	0.049233	1.30774	0.061913	0.806968	1568	2	-7.9304
DHFRL1	0.049274	1.30738	0.062088	0.806968	1569	1	-6.1754
SF3B14	0.049279	1.30734	0.062088	0.806968	1570	2	-6.4066
OCIAD1	0.049326	1.30692	0.065711	0.830105	1571	1	-6.9358
ARHGDIA	0.049353	1.30669	0.065711	0.830105	1572	2	-7.103
B4GALT7	0.049364	1.30659	0.062088	0.806968	1573	1	-6.87
FCGR3A	0.049382	1.30643	0.062088	0.806968	1574	2	-7.3666
DAB2	0.049439	1.30593	0.062263	0.806968	1575	2	-6.6154
BCO2	0.049446	1.30587	0.066042	0.833777	1576	2	-6.9358
SLC5A10	0.049451	1.30582	0.062264	0.806968	1577	2	-5.9353
DCAF8L1	0.049462	1.30573	0.062264	0.806968	1578	2	-7.0756
PYDC2	0.049589	1.30461	0.062442	0.806968	1579	2	-7.1104
NHS	0.049653	1.30405	0.066538	0.839013	1580	2	-7.788
ACTR3	0.04971	1.30356	0.06271	0.806968	1581	2	-6.3728
TRAV38-2DV8	0.049727	1.30341	0.062799	0.806968	1582	2	-6.5289
HPSE2	0.049761	1.30311	0.0628	0.806968	1583	2	-7.4981
PPFIA4	0.049796	1.30281	0.062976	0.806968	1584	2	-7.5371
AVL9	0.049814	1.30265	0.062976	0.806968	1585	1	-6.9377
HMX3	0.049848	1.30235	0.062976	0.806968	1586	2	-6.9038
SH2D3A	0.049859	1.30226	0.062976	0.806968	1587	1	-7.4359
CNKSR1	0.049904	1.30186	0.062976	0.806968	1588	1	-6.9417
AC027307.3	0.049932	1.30162	0.066882	0.842315	1589	2	-7.8671
OCIAD2	0.049934	1.3016	0.062976	0.806968	1590	2	-6.9994
RAET1L	0.049969	1.3013	0.062976	0.806968	1591	2	-7.409
FMN1	0.04998	1.3012	0.062976	0.806968	1592	2	-6.4745
AC004817.1	0.049984	1.30117	0.067468	0.843495	1593	2	-7.771
SLC10A5	0.049992	1.3011	0.062976	0.806968	1594	2	-7.3987
ZBTB12	0.049993	1.30109	0.062976	0.806968	1595	1	-7.199
TLE4	0.050015	1.3009	0.062976	0.806968	1596	2	-6.774
AL391421.1	0.050038	1.3007	0.062976	0.806968	1597	1	-7.102
IPP	0.050083	1.30031	0.062976	0.806968	1598	1	-7.335
CLEC12A	0.050128	1.29992	0.062976	0.806968	1599	1	-7.7038
CCDC174	0.05013	1.2999	0.062976	0.806968	1600	2	-7.021
ZNF217	0.050142	1.2998	0.062976	0.806968	1601	2	-7.8248
NFATC2IP	0.050165	1.2996	0.062977	0.806968	1602	2	-6.6444
GJA8	0.050173	1.29953	0.062977	0.806968	1603	1	-7.3965
AMIGO1	0.050263	1.29875	0.062977	0.806968	1604	1	-6.9386
MMP24	0.050308	1.29836	0.062977	0.806968	1605	1	-7.3197
CUZD1	0.050338	1.2981	0.062977	0.806968	1606	2	-7.5662
POU6F2	0.050367	1.29785	0.062977	0.806968	1607	2	-6.579
ZNF384	0.050385	1.2977	0.062977	0.806968	1608	2	-7.2003
BTBD6	0.050398	1.29759	0.062977	0.806968	1609	1	-6.859
PGBD4	0.050418	1.29741	0.067814	0.846286	1610	1	-6.8213
RECQL	0.050442	1.29721	0.062977	0.806968	1611	1	-7.5878
DUPD1	0.050489	1.2968	0.062977	0.806968	1612	2	-6.6002
DUSP15	0.050532	1.29643	0.062977	0.806968	1613	1	-7.5422
PROSC	0.050565	1.29615	0.067984	0.846286	1614	2	-7.5168
MPC2	0.050582	1.296	0.063154	0.807734	1615	2	-6.9265
WDR64	0.05061	1.29576	0.063155	0.807734	1616	2	-7.2725
MS4A6E	0.050738	1.29467	0.064034	0.812342	1617	2	-7.1089
GAL	0.050757	1.2945	0.064034	0.812342	1618	2	-7.827
OR6B3	0.050767	1.29442	0.064034	0.812342	1619	2	-7.7232
INTS2	0.050802	1.29412	0.064034	0.812342	1620	1	-6.4819
FKBPL	0.050813	1.29403	0.064034	0.812342	1621	2	-6.2755
FLNA	0.050936	1.29298	0.064035	0.812342	1622	1	-7.4837
XKR8	0.050981	1.29259	0.064035	0.812342	1623	1	-7.0014
CC2D2A	0.050988	1.29253	0.064035	0.812342	1624	2	-7.1138
RIBC2	0.050998	1.29245	0.069141	0.85147	1625	2	-6.1613
LACTBL1	0.051005	1.29239	0.064035	0.812342	1626	2	-7.0492
UCP3	0.051071	1.29183	0.064035	0.812342	1627	1	-7.2932
NOP2	0.051186	1.29085	0.069302	0.852946	1628	1	-6.2327
MIA2	0.05125	1.29031	0.066327	0.836855	1629	1	-6.4894
RAB6B	0.05143	1.28878	0.06733	0.842798	1630	1	-6.6398
IL11RA	0.051453	1.28859	0.06733	0.842798	1631	2	-7.3288
CDC5L	0.051475	1.2884	0.06733	0.842798	1632	1	-5.8683
PCSK9	0.051564	1.28765	0.06733	0.842798	1633	1	-6.8695
CWH43	0.051609	1.28727	0.06733	0.842798	1634	1	-7.2962
GSG1L	0.051654	1.2869	0.06733	0.842798	1635	1	-7.5809
ETV5	0.051699	1.28652	0.06733	0.842798	1637	1	-6.7816
NPIPB11	0.051699	1.28652	0.06733	0.842798	1636	2	-6.9008
SAMD11	0.051734	1.28622	0.06733	0.842798	1638	2	-7.6304
CRHBP	0.051792	1.28574	0.067708	0.845978	1639	2	-7.642
PFKFB1	0.051886	1.28495	0.067886	0.846286	1640	2	-7.0919
PRDM8	0.051915	1.28471	0.070628	0.860503	1641	2	-6.6152
CCDC102A	0.051921	1.28466	0.068061	0.846286	1642	2	-7.1658
REPS1	0.051991	1.28407	0.068061	0.846286	1643	2	-7.2222
AC106017.1	0.052032	1.28373	0.068062	0.846286	1644	2	-6.7189
CD207	0.052036	1.2837	0.070789	0.861717	1645	2	-7.3059
ZNF667	0.052058	1.28351	0.068062	0.846286	1646	1	-7.0431
NOL11	0.052085	1.28329	0.068062	0.846286	1647	2	-6.4625
ZNF823	0.052147	1.28277	0.068241	0.848006	1648	1	-7.5558
ABCD2	0.052202	1.28231	0.069075	0.851174	1649	2	-7.5269
SLC27A6	0.052237	1.28202	0.069075	0.851174	1650	1	-7.4282
TP63	0.052343	1.28114	0.069075	0.851174	1651	2	-7.6988
MAEA	0.052354	1.28105	0.069075	0.851174	1652	2	-6.9283
LAMP2	0.052416	1.28054	0.069075	0.851174	1653	1	-7.2726
CH25H	0.052454	1.28022	0.069075	0.851174	1654	2	-6.305
CST11	0.052461	1.28016	0.069075	0.851174	1655	1	-6.439
ELOVL4	0.052506	1.27979	0.069076	0.851174	1656	1	-7.1867
CIB3	0.052551	1.27942	0.069076	0.851174	1657	1	-7.4252
MARCHF6	0.0526	1.27901	0.071487	0.863626	1658	1	-7.1669
SASH3	0.052672	1.27842	0.069076	0.851174	1659	2	-5.6691
LAPTM5	0.05273	1.27794	0.069076	0.851174	1660	1	-7.2732
SOX13	0.052775	1.27757	0.069076	0.851174	1661	1	-7.0483
ODF4	0.052778	1.27755	0.069076	0.851174	1662	2	-6.236
REL	0.052801	1.27736	0.069076	0.851174	1663	2	-7.4171
PLIN1	0.052882	1.27669	0.072096	0.863626	1664	1	-7.679
MIEN1	0.052896	1.27658	0.069881	0.856856	1665	2	-5.5699
AMFR	0.052909	1.27647	0.069881	0.856856	1666	1	-7.4063
CD4	0.052922	1.27636	0.072097	0.863626	1667	1	-7.0475
CHKA	0.053025	1.27552	0.070068	0.856856	1668	2	-7.2618
ARCN1	0.053055	1.27527	0.072629	0.863626	1669	2	-3.7499
CHCHD1	0.053055	1.27527	0.072629	0.863626	1670	2	-7.7607
C18orf54	0.053073	1.27513	0.070068	0.856856	1671	2	-6.6478
C14orf166B	0.053108	1.27484	0.070069	0.856856	1672	2	-7.8909
GNG13	0.05312	1.27474	0.070069	0.856856	1673	2	-5.1387
YME1L1	0.053167	1.27436	0.070069	0.856856	1674	2	-7.3215
SLC25A34	0.053178	1.27427	0.070069	0.856856	1675	1	-7.6919
AC055736.1	0.053208	1.27402	0.053563	0.776854	1676	0	-3.047
PQLC3	0.053312	1.27318	0.070245	0.856856	1677	1	-6.9108
MMP25	0.053357	1.27281	0.070245	0.856856	1678	1	-7.3974
KIR2DL4	0.053402	1.27244	0.070245	0.856856	1679	1	-7.896
TBX22	0.053486	1.27176	0.070245	0.856856	1680	2	-7.7479
HPGD	0.053491	1.27172	0.070245	0.856856	1681	1	-7.6917
STARD3	0.053522	1.27147	0.070245	0.856856	1682	2	-7.1615
ADORA2B	0.053534	1.27137	0.070245	0.856856	1683	2	-7.0507
MUC17	0.053625	1.27063	0.070429	0.858595	1684	2	-7.2045
PMEL	0.053715	1.2699	0.070811	0.861717	1685	1	-6.9875
FKBP4	0.053725	1.26982	0.074478	0.863626	1686	2	-6.1924
CTD-2330K9.3	0.053769	1.26947	0.074478	0.863626	1687	1	-5.8728
FGF4	0.053804	1.26919	0.071448	0.863626	1688	1	-8.395
TMEM71	0.053818	1.26907	0.071448	0.863626	1689	2	-7.4101
CARD18	0.053863	1.26871	0.074479	0.863626	1690	2	-7.1139
PHYHD1	0.053894	1.26846	0.071809	0.863626	1691	1	-7.2019
GULP1	0.053901	1.2684	0.071809	0.863626	1692	2	-7.376
KIAA1598	0.053939	1.2681	0.07181	0.863626	1693	1	-7.1457
TRAF6	0.053983	1.26774	0.072166	0.863626	1694	1	-7.3468
SLC29A4	0.054051	1.2672	0.074806	0.863626	1695	1	-7.3247
PFDN6	0.054062	1.26711	0.072552	0.863626	1696	2	-5.512
RNF25	0.054073	1.26702	0.072552	0.863626	1697	1	-7.2241
TRAJ43	0.054149	1.26641	0.054575	0.787091	1698	0	0.44553
TRIP13	0.054162	1.26631	0.072552	0.863626	1699	1	-6.3407
FAM182B	0.054198	1.26602	0.072552	0.863626	1700	2	-6.7865
HAGH	0.054234	1.26573	0.072552	0.863626	1701	2	-7.4243
CCRL2	0.054252	1.26558	0.072553	0.863626	1702	1	-7.5703
SYNDIG1	0.054282	1.26534	0.072553	0.863626	1703	2	-7.5102
ZIC5	0.054297	1.26522	0.072553	0.863626	1704	1	-6.5947
FBXO6	0.054317	1.26506	0.072553	0.863626	1705	2	-6.1596
PHLDB1	0.054401	1.26439	0.072553	0.863626	1706	2	-8.1226
OLIG3	0.054476	1.26379	0.072744	0.863626	1707	1	-7.2923
GPRASP1	0.054508	1.26354	0.072744	0.863626	1708	2	-7.6337
DERL2	0.054562	1.26311	0.072744	0.863626	1710	2	-7.4481
IL12A	0.054562	1.26311	0.072744	0.863626	1709	2	-7.1409
NMRK2	0.054639	1.2625	0.072745	0.863626	1711	2	-7.2103
RP11-521M14.2	0.054732	1.26176	0.048284	0.769187	1712	1	-5.3376
SLC36A1	0.054744	1.26166	0.072745	0.863626	1713	1	-7.5146
MMP7	0.054789	1.26131	0.072939	0.863626	1714	1	-7.6824
OR1E2	0.054836	1.26093	0.07312	0.863626	1715	2	-6.8008
NAGS	0.05489	1.26051	0.07312	0.863626	1716	2	-6.0227
HRH4	0.054891	1.2605	0.077203	0.87204	1717	2	-7.7468
HEATR5B	0.054923	1.26025	0.07312	0.863626	1718	2	-6.881
SLC22A14	0.054967	1.2599	0.07312	0.863626	1719	1	-7.4844
FOS	0.054998	1.25965	0.07312	0.863626	1720	2	-7.6117
FCAR	0.055057	1.25919	0.07312	0.863626	1721	1	-7.8976
VASH2	0.055058	1.25918	0.077203	0.87204	1722	1	-7.5924
EYA1	0.055102	1.25883	0.073121	0.863626	1723	1	-7.3492
OR2L5	0.055126	1.25864	0.073478	0.863626	1724	1	-6.7639
C16orf95	0.055146	1.25849	0.073121	0.863626	1725	1	-7.868
SH2D1A	0.055153	1.25843	0.073121	0.863626	1726	2	-6.4609
KLHDC10	0.055181	1.25821	0.077203	0.87204	1727	2	-6.5844
PDGFA	0.055191	1.25813	0.073121	0.863626	1728	1	-7.4067
DENND6A	0.055249	1.25768	0.073121	0.863626	1729	2	-7.1341
OR13C7P	0.055256	1.25762	0.077203	0.87204	1730	2	-7.6155
NPR3	0.055414	1.25638	0.074359	0.863626	1731	1	-7.5202
CT47A7	0.055504	1.25568	0.07436	0.863626	1732	1	-5.5077
HNRNPM	0.055513	1.25561	0.07436	0.863626	1733	2	-7.0957
TBRG4	0.055537	1.25542	0.074546	0.863626	1734	2	-7.3102
SYT16	0.055573	1.25514	0.074546	0.863626	1735	2	-6.1633
MFSD4	0.055638	1.25463	0.074546	0.863626	1736	1	-7.3696
C7orf43	0.055682	1.25429	0.074546	0.863626	1737	1	-7.2206
SLC12A8	0.055693	1.2542	0.074546	0.863626	1738	2	-6.7818
XPNPEP2	0.055727	1.25393	0.074546	0.863626	1739	1	-6.9435
RNF10	0.055753	1.25373	0.074546	0.863626	1740	2	-6.9853
CX3CL1	0.05594	1.25228	0.074723	0.863626	1741	2	-8.3091
KXD1	0.05594	1.25228	0.074723	0.863626	1742	2	-7.798
GRM8	0.055951	1.25219	0.074723	0.863626	1743	1	-7.5127
HNRNPDL	0.055964	1.25209	0.074723	0.863626	1744	2	-7.1831
MCHR2	0.056006	1.25177	0.074723	0.863626	1745	2	-7.8302
WDR77	0.056012	1.25172	0.077754	0.873369	1746	2	-5.7805
TATDN1	0.056034	1.25155	0.077754	0.873369	1747	2	-7.4795
SSNA1	0.056044	1.25147	0.077754	0.873369	1748	2	-5.6223
KBTBD3	0.056048	1.25144	0.074723	0.863626	1749	2	-7.0247
TBCD	0.056078	1.25121	0.074723	0.863626	1750	2	-6.5386
MS4A7	0.056084	1.25116	0.074723	0.863626	1751	1	-7.857
TMEM241	0.056129	1.25081	0.074723	0.863626	1752	1	-7.492
HIST1H2BH	0.05615	1.25065	0.074723	0.863626	1753	2	-6.3566
CBLN2	0.056163	1.25055	0.074723	0.863626	1754	2	-7.1181
HOXB7	0.056174	1.25046	0.077926	0.873843	1755	2	-6.2525
RAD54B	0.056175	1.25046	0.074723	0.863626	1756	2	-7.3856
DZIP3	0.056305	1.24945	0.078855	0.879944	1757	1	-7.2578
IGLV1-44	0.056352	1.24909	0.074723	0.863626	1758	1	-7.958
PCDHB12	0.056397	1.24874	0.074724	0.863626	1759	1	-7.785
GNAI1	0.056442	1.2484	0.074724	0.863626	1760	1	-7.2056
RHOBTB2	0.056486	1.24806	0.074724	0.863626	1761	1	-7.2475
DNAJC3	0.056531	1.24771	0.074724	0.863626	1762	1	-7.1917
ITGA9	0.056576	1.24737	0.079972	0.882199	1763	2	-7.5411
TSHZ2	0.05662	1.24703	0.074724	0.863626	1764	1	-7.4563
SLC16A7	0.056665	1.24669	0.074724	0.863626	1765	1	-7.7031
GDF10	0.056734	1.24616	0.079972	0.882199	1766	2	-7.2029
MEF2BNB-MEF2B	0.056766	1.24591	0.079972	0.882199	1767	2	-6.5528
AC024592.12	0.056827	1.24545	0.074819	0.863626	1780	2	-7.3745
ADAMTS7	0.056827	1.24545	0.074819	0.863626	1783	2	-7.2695
ATP1A4	0.056827	1.24545	0.074819	0.863626	1768	2	-6.8923
CEACAM7	0.056827	1.24545	0.074819	0.863626	1784	2	-6.3921
DMRTA1	0.056827	1.24545	0.074819	0.863626	1772	2	-6.8989
ERAS	0.056827	1.24545	0.074819	0.863626	1773	2	-7.3358
F8A1	0.056827	1.24545	0.074819	0.863626	1781	2	-5.8895
GPR83	0.056827	1.24545	0.074819	0.863626	1778	2	-7.2146
LPAR3	0.056827	1.24545	0.074819	0.863626	1779	2	-6.9345
LRRC29	0.056827	1.24545	0.074819	0.863626	1782	2	-7.4173
NBPF1	0.056827	1.24545	0.074819	0.863626	1775	2	-5.9786
PLA2G4B	0.056827	1.24545	0.074819	0.863626	1776	2	-5.853
RNF219	0.056827	1.24545	0.074819	0.863626	1777	2	-6.9192
SHISA4	0.056827	1.24545	0.074819	0.863626	1771	2	-6.8109
SPTSSA	0.056827	1.24545	0.074819	0.863626	1769	2	-6.9987
TRIM77	0.056827	1.24545	0.074819	0.863626	1774	2	-6.1105
WDR90	0.056827	1.24545	0.074819	0.863626	1770	2	-7.2214
SLC38A5	0.056843	1.24532	0.074915	0.863626	1785	1	-7.2373
AL589765.1	0.056908	1.24483	0.080155	0.882199	1786	1	-6.6455
SUGP1	0.056977	1.2443	0.074915	0.863626	1787	1	-6.1861
MAN2A1	0.057022	1.24396	0.074915	0.863626	1788	1	-6.997
C1orf122	0.057111	1.24328	0.075545	0.864706	1789	1	-7.4975
FKSG48	0.057186	1.24271	0.080331	0.882199	1790	2	-5.9834
TCEA2	0.0572	1.2426	0.075545	0.864706	1791	1	-7.7713
VSIG1	0.05731	1.24177	0.080331	0.882199	1792	1	-7.492
NBPF24	0.05735	1.24147	0.080331	0.882199	1793	1	-6.7878
LELP1	0.057415	1.24097	0.080512	0.882199	1794	2	-7.9988
CLEC3B	0.057423	1.24091	0.075546	0.864706	1795	1	-6.1489
SAR1B	0.057556	1.23991	0.076186	0.864706	1796	2	-6.9772
OR2G2	0.057602	1.23956	0.076186	0.864706	1797	1	-6.8957
FOXF2	0.057623	1.2394	0.076186	0.864706	1798	2	-7.3432
TMEM170B	0.057646	1.23923	0.076186	0.864706	1799	1	-6.9462
MCF2	0.057736	1.23855	0.076186	0.864706	1800	1	-7.749
ZNF69	0.057763	1.23835	0.076186	0.864706	1801	2	-7.2576
KIRREL2	0.05778	1.23822	0.076186	0.864706	1802	2	-7.5502
OPHN1	0.057836	1.2378	0.076186	0.864706	1803	2	-6.8904
KCNT1	0.057852	1.23768	0.081471	0.882199	1804	2	-6.5528
NTN3	0.05786	1.23762	0.076186	0.864706	1805	2	-6.2993
S100A7	0.057892	1.23738	0.076186	0.864706	1807	1	-8.0872
S100A7A	0.057892	1.23738	0.076186	0.864706	1806	1	-7.3813
ZRSR2	0.057896	1.23735	0.081471	0.882199	1808	2	-4.4774
FLRT2	0.057953	1.23692	0.081471	0.882199	1809	1	-7.7572
SCAP	0.057958	1.23689	0.076186	0.864706	1810	1	-7.2919
RORA	0.057988	1.23666	0.076186	0.864706	1811	2	-6.1083
VIPAS39	0.058025	1.23638	0.076186	0.864706	1812	2	-6.753
IGKV1D-8	0.058055	1.23616	0.076186	0.864706	1813	2	-6.7732
MROH2B	0.058092	1.23588	0.076186	0.864706	1814	1	-8.478
ACBD3	0.058113	1.23573	0.081663	0.882199	1815	1	-7.1193
HBA1	0.058135	1.23556	0.076186	0.864706	1816	2	-6.4049
HBA2	0.058135	1.23556	0.076186	0.864706	1817	2	-6.4049
IL17RE	0.058137	1.23555	0.076186	0.864706	1818	1	-7.6602
ACSM2B	0.058153	1.23543	0.076186	0.864706	1819	2	-4.9365
ACSM5	0.058165	1.23534	0.076186	0.864706	1820	2	-7.1388
CCDC116	0.058177	1.23525	0.076186	0.864706	1821	2	-7.5387
GGA2	0.058202	1.23506	0.076186	0.864706	1822	2	-7.592
RPS21	0.058226	1.23488	0.076186	0.864706	1823	1	-7.0583
ERN2	0.058269	1.23456	0.081664	0.882199	1824	2	-7.7433
KRTAP20-2	0.058336	1.23406	0.076374	0.865398	1825	2	-7.5139
INO80E	0.05836	1.23388	0.076374	0.865398	1826	1	-7.7627
CD36	0.058373	1.23379	0.076374	0.865398	1827	2	-7.1747
DUOX1	0.058493	1.2329	0.077256	0.87204	1828	1	-6.271
F13A1	0.058593	1.23215	0.077256	0.87204	1829	2	-7.3301
CYP19A1	0.058606	1.23206	0.077256	0.87204	1830	2	-7.3588
DIS3L	0.058671	1.23158	0.077451	0.872809	1831	2	-6.296
CXCL10	0.058701	1.23135	0.076155	0.864706	1832	1	-7.2529
MMP27	0.05871	1.23129	0.077452	0.872809	1834	2	-5.7521
ZNF766	0.05871	1.23129	0.077452	0.872809	1833	2	-7.3883
ZNF620	0.058765	1.23088	0.07765	0.873369	1835	2	-5.9076
ZNF821	0.058805	1.23059	0.077841	0.873369	1836	1	-7.5589
SERHL2	0.05882	1.23047	0.077841	0.873369	1837	2	-5.9275
PRSS22	0.05885	1.23025	0.077841	0.873369	1838	2	-7.5566
RBPMS	0.058851	1.23025	0.077841	0.873369	1839	2	-6.6676
ZNF763	0.058864	1.23015	0.0934	0.882199	1840	2	-6.6191
SLC30A5	0.058983	1.22927	0.078035	0.874587	1841	1	-7.0133
PCK2	0.059035	1.22889	0.078431	0.876639	1842	2	-7.1271
DLX6	0.059072	1.22862	0.078431	0.876639	1843	1	-7.7993
HIST1H3H	0.059117	1.22829	0.078431	0.876639	1844	1	-7.3407
C11orf1	0.059146	1.22807	0.078431	0.876639	1845	2	-7.4491
CYP4V2	0.059161	1.22796	0.078431	0.876639	1846	1	-7.7791
CFP	0.059244	1.22736	0.079445	0.882199	1847	2	-5.6819
MPP1	0.059306	1.2269	0.080056	0.882199	1848	2	-7.2948
TICAM1	0.059339	1.22666	0.080056	0.882199	1849	1	-7.1
PDHB	0.059473	1.22568	0.080233	0.882199	1850	1	-7.3591
PIF1	0.059478	1.22564	0.080233	0.882199	1851	2	-7.3831
ASCC2	0.059518	1.22535	0.080424	0.882199	1852	1	-7.31
RP1-228P16.5	0.05952	1.22534	0.065335	0.826879	1853	1	-7.5571
USP38	0.059552	1.2251	0.080424	0.882199	1854	2	-7.2
FSHR	0.059601	1.22475	0.080424	0.882199	1855	2	-7.8179
ANK2	0.059607	1.2247	0.080424	0.882199	1856	1	-6.8705
SHC2	0.059613	1.22466	0.080424	0.882199	1857	2	-7.645
KIAA1377	0.059638	1.22448	0.080424	0.882199	1858	2	-7.0115
EBF4	0.059696	1.22405	0.080424	0.882199	1859	1	-7.3524
MAST3	0.0597	1.22403	0.080424	0.882199	1860	2	-6.2194
RP11-133K1.2	0.059718	1.22389	0.083968	0.882199	1861	1	-7.1084
AC144568.2	0.059724	1.22385	0.080424	0.882199	1862	2	-6.3286
PSMF1	0.05974	1.22373	0.080424	0.882199	1863	1	-6.1125
PRKD1	0.059774	1.22349	0.080424	0.882199	1864	2	-7.2096
C4orf6	0.059785	1.22341	0.080424	0.882199	1865	1	-6.5988
TNFRSF21	0.059786	1.2234	0.080424	0.882199	1866	2	-7.7863
MAPK7	0.059811	1.22322	0.080424	0.882199	1867	2	-6.7149
DNAJA4	0.059829	1.22309	0.080619	0.882199	1868	1	-7.4726
SRSF12	0.059848	1.22295	0.080619	0.882199	1869	2	-7.6767
SCAF11	0.059918	1.22244	0.08062	0.882199	1870	1	-7.4962
IGHV3-13	0.059934	1.22233	0.08062	0.882199	1871	2	-7.5624
AC010336.1	0.059947	1.22223	0.08062	0.882199	1872	2	-6.6689
ARPC1B	0.06007	1.22134	0.081248	0.882199	1873	2	-7.6827
KRTAP11-1	0.060083	1.22125	0.081248	0.882199	1874	2	-6.7059
SLC35G5	0.060096	1.22115	0.081428	0.882199	1875	1	-7.5687
CT47A10	0.060141	1.22083	0.08162	0.882199	1876	1	-5.575
AC132872.2	0.060157	1.22071	0.08162	0.882199	1877	2	-6.0708
RUNX3	0.060182	1.22053	0.081621	0.882199	1878	2	-7.7692
PRSS57	0.060206	1.22036	0.08182	0.882199	1879	2	-7.5796
ECI1	0.060305	1.21965	0.081996	0.882199	1880	2	-7.5072
EPHA8	0.060363	1.21923	0.082202	0.882199	1881	1	-6.8799
AWAT1	0.06038	1.21911	0.082202	0.882199	1882	2	-7.2982
ALG12	0.060454	1.21857	0.082202	0.882199	1883	2	-7.0291
CT47A9	0.060541	1.21795	0.082202	0.882199	1884	1	-5.6935
MKX	0.06059	1.2176	0.082202	0.882199	1885	2	-6.472
RP11-644F5.10	0.060609	1.21746	0.082202	0.882199	1886	2	-3.7251
HIST1H2BL	0.060674	1.217	0.082578	0.882199	1887	1	-6.5163
MPPED1	0.060739	1.21653	0.08322	0.882199	1888	2	-7.3571
WDR81	0.060789	1.21618	0.08322	0.882199	1889	2	-6.0684
FAM194B	0.060808	1.21604	0.08322	0.882199	1890	2	-7.4305
MANEAL	0.060839	1.21582	0.085117	0.882199	1892	1	-7.7079
TSPAN9	0.060839	1.21582	0.08322	0.882199	1891	2	-7.0677
RNF125	0.060852	1.21573	0.08322	0.882199	1893	1	-7.3197
C1orf186	0.060876	1.21555	0.08322	0.882199	1894	2	-7.3319
INA	0.060941	1.21509	0.08322	0.882199	1895	1	-6.6743
PRKCB	0.060988	1.21476	0.08322	0.882199	1896	2	-7.2335
CIAPIN1	0.06103	1.21446	0.083428	0.882199	1897	1	-7.875
ZNF177	0.061081	1.21409	0.083428	0.882199	1898	2	-7.0865
NEDD4	0.061174	1.21343	0.083626	0.882199	1899	2	-7.0435
EEA1	0.061208	1.21319	0.083626	0.882199	1900	1	-6.1375
PRICKLE4	0.061262	1.21281	0.083626	0.882199	1901	2	-6.9254
C14orf178	0.061324	1.21237	0.083627	0.882199	1902	2	-5.8652
CCDC81	0.06136	1.21211	0.086232	0.882199	1903	1	-7.3059
AASS	0.061486	1.21122	0.083828	0.882199	1904	2	-7.2688
AC015987.2	0.061549	1.21078	0.066746	0.841108	1905	1	-6.3567
PDIA3	0.061561	1.21069	0.084229	0.882199	1906	2	-5.9775
TRIM7	0.061563	1.21068	0.084229	0.882199	1907	1	-7.3517
AP001652.1	0.061586	1.21052	0.084229	0.882199	1908	2	-5.9057
SETD1B	0.061623	1.21026	0.084434	0.882199	1909	2	-5.7062
CNBD2	0.061648	1.21008	0.084435	0.882199	1910	2	-6.7041
TRBV10-2	0.061673	1.2099	0.08463	0.882199	1911	2	-6.711
HBD	0.061741	1.20943	0.08463	0.882199	1912	2	-7.6437
ZFP82	0.061785	1.20912	0.084631	0.882199	1913	1	-7.2247
HUG1	0.061874	1.20849	0.084818	0.882199	1914	1	-7.9232
HAL	0.061886	1.20841	0.084818	0.882199	1915	2	-6.7742
CT47A8	0.061941	1.20802	0.084818	0.882199	1917	1	-5.3829
TONSL	0.061941	1.20802	0.084818	0.882199	1916	1	-5.7202
CRYAA	0.062007	1.20756	0.085007	0.882199	1918	1	-7.3452
RP11-503N18.3	0.062048	1.20727	0.085215	0.882199	1919	2	-7.3883
NR5A1	0.062052	1.20724	0.085215	0.882199	1920	1	-7.5956
ZSCAN16	0.062086	1.20701	0.085437	0.882199	1921	2	-6.4129
RP11-1220K2.2	0.062096	1.20694	0.085437	0.882199	1922	1	-6.8799
SEMA5A	0.062098	1.20692	0.085437	0.882199	1923	2	-5.8449
LBP	0.062111	1.20683	0.085437	0.882199	1924	2	-7.1797
CCL13	0.06214	1.20663	0.085437	0.882199	1925	1	-7.7827
SNAPC5	0.062185	1.20631	0.085437	0.882199	1926	1	-5.9515
TMEM27	0.062198	1.20622	0.085437	0.882199	1927	2	-6.7832
KRTAP4-7	0.0622	1.20621	0.086806	0.882199	1928	1	-6.9235
ASUN	0.062229	1.20601	0.085437	0.882199	1929	1	-6.9642
SQLE	0.062248	1.20587	0.085437	0.882199	1930	2	-6.5907
CYP11A1	0.062273	1.2057	0.085437	0.882199	1931	2	-7.8198
LINC00955	0.062374	1.205	0.086051	0.882199	1932	2	-7.1465
CHD7	0.062407	1.20477	0.086051	0.882199	1933	1	-6.9914
LIG3	0.062468	1.20434	0.086687	0.882199	1934	2	-6.7836
CFC1	0.06254	1.20384	0.086687	0.882199	1935	1	-7.1747
AC006156.1	0.062625	1.20325	0.086874	0.882199	1936	2	-7.5216
CFC1B	0.062629	1.20322	0.086874	0.882199	1937	1	-7.7266
FAM57A	0.06265	1.20308	0.086874	0.882199	1938	2	-7.3527
KLK9	0.06266	1.20301	0.097677	0.882199	1939	2	-7.6169
ARID3B	0.062687	1.20282	0.086874	0.882199	1940	2	-6.73
SLC22A9	0.062763	1.2023	0.086874	0.882199	1941	2	-6.8709
AP000769.1	0.062806	1.202	0.086874	0.882199	1942	1	-7.4987
C7orf71	0.062826	1.20186	0.086874	0.882199	1943	2	-7.0942
ATXN1L	0.062919	1.20122	0.087362	0.882199	1944	1	-6.9296
RP11-446E24.4	0.062958	1.20095	0.086875	0.882199	1945	2	-7.8619
NKX2-6	0.063014	1.20056	0.086875	0.882199	1946	2	-5.9635
OPRL1	0.063046	1.20034	0.086875	0.882199	1947	2	-7.4894
ADAMTS12	0.063072	1.20016	0.086875	0.882199	1948	1	-6.6137
DZIP1L	0.06309	1.20004	0.086875	0.882199	1949	2	-6.9235
HELT	0.063161	1.19955	0.086875	0.882199	1950	1	-7.4108
BRD7	0.063184	1.19939	0.086875	0.882199	1951	2	-7.1966
KDM6A	0.063199	1.19929	0.087362	0.882199	1952	1	-6.7041
DPP3	0.063205	1.19925	0.087072	0.882199	1953	1	-7.3003
TSPAN11	0.06325	1.19894	0.087072	0.882199	1954	1	-7.3756
AP000679.2	0.063273	1.19878	0.087072	0.882199	1955	2	-7.4824
CT47A3	0.063294	1.19864	0.087072	0.882199	1956	1	-5.5841
TMED4	0.063339	1.19833	0.087072	0.882199	1957	1	-7.1902
FKBP14	0.063383	1.19803	0.087072	0.882199	1958	1	-7.0189
SPCS3	0.063427	1.19773	0.087271	0.882199	1959	1	-7.0912
C1orf192	0.06343	1.19771	0.087271	0.882199	1960	2	-7.596
FAM9C	0.063462	1.19749	0.087371	0.882199	1961	2	-6.1955
GLIPR1L1	0.063556	1.19684	0.087471	0.882199	1962	2	-7.5949
GPR116	0.063569	1.19675	0.087471	0.882199	1963	2	-6.6087
FDX1	0.063605	1.19651	0.087676	0.882199	1964	1	-7.0724
AL133373.1	0.063613	1.19645	0.087778	0.882199	1965	2	-7.4096
RASAL1	0.063632	1.19632	0.08788	0.882199	1966	2	-7.1596
KIAA1328	0.063638	1.19628	0.087362	0.882199	1967	1	-7.4753
SPAG11B	0.063651	1.19619	0.08788	0.882199	1968	2	-7.14
ITPR1	0.063738	1.1956	0.08788	0.882199	1969	1	-7.6567
PRY	0.063739	1.19559	0.08788	0.882199	1970	2	-7.3201
PRY2	0.063739	1.19559	0.08788	0.882199	1971	2	-7.3201
ARSH	0.063771	1.19538	0.08788	0.882199	1972	2	-7.0399
C18orf56	0.063782	1.1953	0.08788	0.882199	1973	1	-7.5679
SIPA1L3	0.063826	1.195	0.08788	0.882199	1974	1	-7.5668
FAM105B	0.063878	1.19465	0.087948	0.882199	1975	1	-7.3478
KIF27	0.063918	1.19438	0.087948	0.882199	1976	1	-6.0527
FAM173A	0.063958	1.19411	0.087948	0.882199	1977	1	-7.6457
CT47A2	0.063981	1.19395	0.08788	0.882199	1978	1	-5.1916
CT47A5	0.063981	1.19395	0.08788	0.882199	1979	1	-5.5474
OR10H5	0.064092	1.1932	0.087881	0.882199	1980	1	-7.3817
ZNF730	0.064137	1.19289	0.087881	0.882199	1981	1	-7.4795
FOXJ1	0.064225	1.1923	0.087881	0.882199	1982	1	-7.3841
MUC22	0.064314	1.19169	0.087881	0.882199	1983	1	-7.7429
PYHIN1	0.064447	1.1908	0.087881	0.882199	1984	1	-7.3663
TAAR2	0.064476	1.1906	0.088539	0.882199	1985	1	-7.4499
BCAS4	0.064493	1.19049	0.088488	0.882199	1998	2	-6.1797
C15orf54	0.064493	1.19049	0.088488	0.882199	2003	2	-6.8461
CCDC12	0.064493	1.19049	0.088488	0.882199	1988	2	-6.9851
FAM151B	0.064493	1.19049	0.088488	0.882199	1993	2	-7.7866
IL17B	0.064493	1.19049	0.088488	0.882199	1999	2	-7.8179
IZUMO3	0.064493	1.19049	0.088488	0.882199	2000	2	-7.8138
KCNK13	0.064493	1.19049	0.088488	0.882199	1986	2	-7.9443
OR9Q1	0.064493	1.19049	0.088488	0.882199	2001	2	-7.1583
PRDM1	0.064493	1.19049	0.088488	0.882199	1990	2	-6.6103
RNF11	0.064493	1.19049	0.088488	0.882199	1991	2	-6.9442
RP11-447L10.1	0.064493	1.19049	0.088488	0.882199	1987	2	-7.2499
STRA13	0.064493	1.19049	0.088488	0.882199	1996	2	-7.2494
TCTEX1D2	0.064493	1.19049	0.088488	0.882199	1989	2	-7.2499
TRAV20	0.064493	1.19049	0.088488	0.882199	1997	2	-5.82
[truncated: 18,565 more rows]

## Sheet: Analysis targeted screen
Gene ID	pos|score	-log(score)	pos|p-value	pos|fdr	pos|rank	pos|goodsgrna	pos|lfc
NPC1	8.9475e-18	17.0483	4.9455e-06	9e-05	1	10	6.2979
VPS45	1.2821e-17	16.8921	4.9455e-06	9e-05	2	9	7.0813
COG3	1.0418e-16	15.9822	4.9455e-06	9e-05	3	10	5.282
LDLR	2.7698e-16	15.5576	4.9455e-06	9e-05	4	9	7.4606
VAC14	1.0984e-15	14.9592	4.9455e-06	9e-05	5	10	4.7215
VPS16	1.2699e-15	14.8962	4.9455e-06	9e-05	6	9	6.9581
EHD1	5.8493e-15	14.2329	4.9455e-06	9e-05	7	10	4.8885
SREBF1	4.3983e-14	13.3567	4.9455e-06	9e-05	8	9	6.1996
COG7	2.5949e-13	12.5859	4.9455e-06	9e-05	9	9	3.9593
RP11-512M8.5	2.9315e-13	12.5329	4.9455e-06	9e-05	10	8	6.9921
ATP2A2	5.0614e-13	12.2957	4.9455e-06	9e-05	11	8	6.194
WDR7	6.439e-13	12.1912	4.9455e-06	9e-05	12	9	4.1361
USP8	1.1862e-12	11.9258	4.9455e-06	9e-05	13	9	4.4127
ATP6V1B2	4.0672e-12	11.3907	4.9455e-06	9e-05	14	10	3.087
PTPN23	5.3174e-12	11.2743	4.9455e-06	9e-05	15	9	3.6747
GNPTAB	1.3697e-11	10.8634	4.9455e-06	9e-05	16	9	4.3294
COPG1	1.4791e-11	10.83	4.9455e-06	9e-05	17	8	4.1365
VPS11	2.5207e-11	10.5985	4.9455e-06	9e-05	18	10	6.2457
DNM2	3.5801e-11	10.4461	4.9455e-06	9e-05	19	8	5.1578
VPS18	3.9411e-11	10.4044	4.9455e-06	9e-05	20	9	3.438
PIK3C3	8.9781e-11	10.0468	4.9455e-06	9e-05	21	8	4.5459
ARF4	1.6148e-10	9.79188	4.9455e-06	9e-05	22	8	4.5504
ATP6AP1	8.1736e-10	9.08759	4.9455e-06	9e-05	23	9	2.8429
COG8	1.3477e-09	8.87041	4.9455e-06	9e-05	24	9	2.5832
RP11-343C2.9	1.3477e-09	8.87041	4.9455e-06	9e-05	25	9	3.3549
COPB1	1.5446e-09	8.81118	4.9455e-06	9e-05	26	8	2.8921
RABGEF1	1.7119e-09	8.76652	4.9455e-06	9e-05	27	7	5.5936
C19orf25	3.8704e-09	8.41224	4.9455e-06	9e-05	28	8	2.8629
ATP6V1A	5.1773e-09	8.2859	4.9455e-06	9e-05	29	8	3.1186
COG4	8.8153e-09	8.05476	4.9455e-06	9e-05	30	8	4.5196
ATP6V0E1	9.9447e-09	8.00241	4.9455e-06	9e-05	31	8	2.6997
ZFYVE20	1.025e-08	7.98928	4.9455e-06	9e-05	32	8	3.3325
CCDC115	1.0354e-08	7.98489	4.9455e-06	9e-05	33	8	3.4603
AP2M1	1.0563e-08	7.97621	4.9455e-06	9e-05	34	8	2.4064
BECN1	1.2625e-08	7.89877	4.9455e-06	9e-05	35	8	3.5968
ATP6AP2	1.9435e-08	7.71142	4.9455e-06	9e-05	36	7	3.4791
VPS52	1.9974e-08	7.69953	4.9455e-06	9e-05	37	7	3.0559
ATP6V1H	9.2743e-08	7.03272	4.9455e-06	9e-05	38	7	4.0756
RAB7A	9.898e-08	7.00445	4.9455e-06	9e-05	39	8	2.1571
HSP90B1	1.0986e-07	6.95916	4.9455e-06	9e-05	40	8	2.4316
HGS	1.2462e-07	6.90441	4.9455e-06	9e-05	41	7	3.0217
ATP6V1F	1.2542e-07	6.90163	4.9455e-06	9e-05	42	7	2.4541
ANKFY1	1.2627e-07	6.8987	4.9455e-06	9e-05	43	8	2.5318
ARF1	1.4895e-07	6.82696	4.9455e-06	9e-05	44	8	1.9779
ATP6V0D1	1.5143e-07	6.81979	4.9455e-06	9e-05	45	7	2.9592
TMEM199	1.8481e-07	6.73327	4.9455e-06	9e-05	46	7	2.3866
VPS39	1.9396e-07	6.71229	4.9455e-06	9e-05	47	7	4.0538
ATP6V1D	2.3369e-07	6.63136	4.9455e-06	9e-05	48	7	3.5923
VPS53	2.4652e-07	6.60815	4.9455e-06	9e-05	49	7	3.3218
FIG4	3.1427e-07	6.5027	4.9455e-06	9e-05	50	7	3.5185
NPC2	5.331e-07	6.27319	4.9455e-06	9e-05	51	7	3.2638
PTAR1	5.3758e-07	6.26956	4.9455e-06	9e-05	52	7	2.2345
VMA21	6.318e-07	6.19942	4.9455e-06	9e-05	53	6	3.2429
COPB2	6.6678e-07	6.17602	4.9455e-06	9e-05	54	7	3.0974
ATP6V1G1	1.0088e-06	5.99619	4.9455e-06	9e-05	55	7	2.2449
VPS54	1.6945e-06	5.77096	1.4837e-05	0.000261	56	7	2.0012
PIK3R4	2.2918e-06	5.63982	1.4837e-05	0.000261	57	7	2.4256
INSIG1	3.5614e-06	5.44838	2.4728e-05	0.000413	58	7	2.9238
RP11-371E8.4	4.5751e-06	5.3396	2.4728e-05	0.000413	59	6	2.3704
COG5	6.257e-06	5.20363	2.4728e-05	0.000413	60	6	2.568
VPS41	8.846e-06	5.05325	3.4619e-05	0.000568	61	6	2.3756
CCZ1	2.4086e-05	4.61824	0.00012364	0.001996	62	5	1.5086
VPS8	3.4849e-05	4.45781	0.00019288	0.003065	63	6	2.2276
C18orf8	4.1296e-05	4.38409	0.00024233	0.00379	64	6	1.8491
TMEM251	9.6609e-05	4.01498	0.00041048	0.006321	65	5	1.3329
DNAJC13	0.00011564	3.93689	0.00054896	0.008326	66	6	1.6607
BAP1	0.00011675	3.93274	0.00055885	0.008349	67	6	1.7145
SLC39A7	0.00012068	3.91836	0.00058852	0.008663	68	6	1.6144
UBIAD1	0.0003109	3.50738	0.0014095	0.020448	69	5	1.7146
NBAS	0.00038026	3.41992	0.001726	0.024682	70	5	1.557
CCZ1B	0.00047895	3.31971	0.0019931	0.028099	71	4	0.89202
COG1	0.00055286	3.25738	0.0023294	0.032384	72	4	0.98768
SCYL1	0.00096218	3.01674	0.0041691	0.056396	73	5	1.2775
TMED10	0.0010196	2.99157	0.0044658	0.059604	74	5	1.3999
EMC6	0.0010536	2.97732	0.0045845	0.060383	75	4	0.9233
ATP6V0B	0.0010558	2.97642	0.0038724	0.053099	76	4	1.3166
ATP6C	0.0011417	2.94245	0.0049802	0.064742	77	4	0.34908
UVRAG	0.0013368	2.87393	0.0056923	0.072879	78	5	1.3415
HMGCR	0.0013523	2.86893	0.0057517	0.072879	79	4	1.1856
GINS1	0.001521	2.81787	0.0064045	0.080136	80	5	0.96051
VPS51	0.0019703	2.70547	0.0078882	0.097482	81	4	1.2293
EXOC5	0.002071	2.68382	0.0082047	0.100157	82	4	1.1314
EXOC7	0.002753	2.56019	0.009995	0.120542	83	4	1.2518
BLOC1S2	0.0031609	2.50019	0.011221	0.133722	84	4	1.1427
EMC4	0.0041838	2.37843	0.014238	0.167676	85	4	0.57027
EXOC8	0.0060859	2.21568	0.019767	0.230083	86	4	1.3614
GALNT11	0.0079768	2.09817	0.024921	0.28673	87	4	1.4845
RER1	0.0091865	2.03685	0.028195	0.318667	88	4	1.3234
EHD4	0.009243	2.03419	0.028333	0.318667	89	2	0.66307
SFPQ	0.0093605	2.0287	0.028739	0.319637	90	4	1.4474
EMC3	0.01014	1.99396	0.030865	0.335827	91	4	1.2689
RPS15A	0.01038	1.9838	0.030826	0.335827	92	3	0.30802
CDC20	0.011491	1.93964	0.034663	0.373097	93	4	0.76158
AAGAB	0.016746	1.77609	0.046721	0.497525	94	3	1.0625
MESDC2	0.022792	1.64222	0.05946	0.626524	95	3	1.2321
KCNJ12	0.027933	1.55388	0.070064	0.730559	96	3	1.3555
RIOK2	0.028703	1.54207	0.071617	0.739053	97	3	-0.26743
SPNS1	0.036072	1.44283	0.085276	0.871035	98	3	0.47913
DAGLA	0.037808	1.42242	0.088857	0.894604	99	3	0.19997
DBR1	0.03806	1.41953	0.089371	0.894604	100	3	0.13049
SCARF1	0.039076	1.40809	0.09131	0.897835	101	3	-0.15848
RINT1	0.039178	1.40696	0.091488	0.897835	102	3	0.98106
ZNHIT1	0.040419	1.39341	0.093941	0.905988	103	3	0.25475
KANSL3	0.040523	1.3923	0.094129	0.905988	104	3	1.2345
EMC2	0.045366	1.34327	0.10386	0.990146	105	3	0.94713
NKX3-1	0.049104	1.30888	0.11138	0.999768	106	3	0.41994
UBR5	0.05228	1.28166	0.11768	0.999768	107	3	0.7438
FCHSD1	0.053163	1.27439	0.11943	0.999768	108	1	-0.36744
PICALM	0.05705	1.24374	0.12693	0.999768	109	3	0.55911
PDE4A	0.060479	1.2184	0.1335	0.999768	110	3	0.26476
TGFBRAP1	0.064809	1.18836	0.14154	0.999768	111	3	0.94799
NAPG	0.066016	1.18035	0.14381	0.999768	112	3	0.99517
UBAP1	0.068053	1.16715	0.14773	0.999768	113	3	0.62408
UBA3	0.072329	1.14069	0.15288	0.999768	114	2	0.073733
AANAT	0.079716	1.09845	0.16134	0.999768	115	2	0.037093
VWC2L	0.088316	1.05396	0.17147	0.999768	116	2	0.29993
AP2S1	0.097203	1.01232	0.18207	0.999768	117	2	0.79614
KCTD12	0.10124	0.994648	0.18656	0.999768	118	2	0.40039
DNAJA3	0.10267	0.988556	0.18831	0.999768	119	1	-3.2655
DNASE1L2	0.10481	0.979597	0.19098	0.999768	120	2	0.38778
VPS36	0.11788	0.92856	0.20603	0.999768	121	2	0.50463
C1orf141	0.12458	0.904552	0.21432	0.999768	122	2	0.35776
ACBD6	0.12947	0.887831	0.21999	0.999768	123	2	-1.1382
GNAI3	0.13084	0.883259	0.22157	0.999768	124	2	-0.019566
PNOC	0.13303	0.87605	0.22403	0.999768	125	2	0.44481
PIAS1	0.13358	0.874259	0.22466	0.999768	126	2	0.25372
MPI	0.13579	0.867132	0.22713	0.999768	127	2	0.11307
PIKFYVE	0.13884	0.857485	0.23069	0.999768	128	2	0.066394
ASXL2	0.14191	0.847987	0.2343	0.999768	129	2	0.95434
CDH24	0.15179	0.818757	0.24574	0.999768	130	2	-0.29686
SGMS1	0.15894	0.798767	0.25446	0.999768	131	2	-0.31294
KCTD5	0.16908	0.771908	0.2663	0.999768	132	2	0.52687
DDI1	0.17054	0.768174	0.26802	0.999768	133	2	0.23645
ISOC2	0.17084	0.76741	0.26842	0.999768	134	2	0.56971
DOK2	0.17142	0.765939	0.26918	0.999768	135	2	0.39134
HMGB3	0.17318	0.761502	0.27138	0.999768	136	2	-0.20114
PES1	0.17397	0.759526	0.26824	0.999768	137	1	-3.9429
C17orf51	0.17759	0.750581	0.27659	0.999768	138	2	0.62503
CHSY1	0.18084	0.742706	0.28063	0.999768	139	2	0.53603
SPAG5	0.18173	0.740573	0.28172	0.999768	140	2	-0.38568
KIF23	0.18291	0.737763	0.28286	0.999768	141	2	-2.0622
C15orf57	0.1847	0.733533	0.28515	0.999768	142	2	0.55341
NPRL3	0.18797	0.725911	0.28887	0.999768	143	2	0.70528
GPATCH3	0.18884	0.723906	0.28751	0.999768	144	2	-0.20236
AC131097.4	0.18943	0.722551	0.29081	0.999768	145	1	-0.31558
CYP24A1	0.18946	0.722482	0.29086	0.999768	146	2	0.33345
TNFRSF8	0.19486	0.710277	0.29757	0.999768	147	2	0.92626
CD74	0.19816	0.702984	0.30165	0.999768	148	2	0.67217
ERMAP	0.19997	0.699035	0.30402	0.999768	149	2	0.4896
KREMEN2	0.20148	0.695768	0.30568	0.999768	150	2	0.011677
TERF2	0.20467	0.688946	0.30983	0.999768	151	1	-3.4015
PER1	0.20602	0.686091	0.31139	0.999768	152	2	0.18621
PRM1	0.20724	0.683526	0.31278	0.999768	153	2	-0.43265
CLCN7	0.20754	0.682898	0.31318	0.999768	154	2	0.37406
WNT8B	0.20875	0.680374	0.31494	0.999768	155	2	-0.15911
E4F1	0.20925	0.679335	0.31553	0.999768	156	1	-0.084042
ATMIN	0.20967	0.678464	0.31599	0.999768	157	2	0.99028
RABEP1	0.21058	0.676583	0.31697	0.999768	158	2	1.0803
C6orf195	0.21088	0.675965	0.31741	0.999768	159	2	0.2132
TEX15	0.21302	0.67158	0.31982	0.999768	160	2	-0.27206
GABRG3	0.21943	0.658704	0.32738	0.999768	161	2	0.18423
NUGGC	0.22035	0.656887	0.32828	0.999768	162	2	0.44738
NAT8L	0.22557	0.646719	0.33485	0.999768	163	2	0.45242
SLC44A5	0.22711	0.643764	0.33681	0.999768	164	2	0.44213
C8orf58	0.22772	0.642599	0.33749	0.999768	165	2	-0.46343
MAEA	0.22896	0.64024	0.33897	0.999768	166	2	0.5109
FCHO2	0.23358	0.631564	0.34471	0.999768	167	2	0.46255
BMP1	0.23389	0.630988	0.34511	0.999768	168	2	0.86086
CCDC93	0.235	0.628932	0.34645	0.999768	169	1	0.088536
DNASE1	0.23636	0.626426	0.34816	0.999768	170	2	0.6234
FBXW7	0.23729	0.624721	0.34945	0.999768	171	2	0.33495
SPATS2	0.23791	0.623587	0.35004	0.999768	172	2	0.017729
ZFYVE21	0.23822	0.623022	0.3504	0.999768	173	2	0.13427
UBR2	0.23977	0.620205	0.3522	0.999768	174	2	0.65232
RBM10	0.24349	0.613519	0.35664	0.999768	175	2	0.26099
C1orf106	0.24442	0.611863	0.35764	0.999768	176	2	-1.3674
TIMM22	0.24597	0.609118	0.35927	0.999768	177	2	0.46659
TM4SF20	0.24629	0.608553	0.35973	0.999768	178	2	0.39151
GRIN2D	0.24753	0.606372	0.36104	0.999768	179	2	0.15469
C1GALT1C1	0.24908	0.603661	0.36293	0.999768	180	2	0.83148
SLC47A2	0.24971	0.602564	0.36359	0.999768	181	2	0.55783
PTRHD1	0.25033	0.601487	0.36442	0.999768	182	2	-0.53005
DENND6B	0.25189	0.598789	0.36627	0.999768	183	2	0.15229
DPM1	0.25313	0.596656	0.36776	0.999768	184	2	1.0859
FDFT1	0.25344	0.596125	0.36812	0.999768	185	2	0.70277
JTB	0.25469	0.593988	0.3695	0.999768	186	2	0.062078
CHP1	0.255	0.59346	0.36986	0.999768	187	2	0.76235
HK2	0.25567	0.59232	0.37059	0.999768	188	1	-1.6022
COL4A3	0.25594	0.591862	0.37087	0.999768	189	2	0.33837
BCKDHA	0.25812	0.588178	0.37382	0.999768	190	2	-0.32432
CABLES1	0.25938	0.586064	0.37518	0.999768	191	1	0.35261
none	0.26018	0.584726	0.37602	0.999768	192	158	-0.23742
SCARA5	0.26031	0.584509	0.37613	0.999768	193	2	0.63494
FAM71B	0.26552	0.575903	0.37876	0.999768	194	1	-0.46211
SWSAP1	0.26857	0.570943	0.3803	0.999768	195	1	0.73761
UTP14A	0.27584	0.559343	0.38413	0.999768	196	1	0.084846
AP2A2	0.27765	0.556502	0.38511	0.999768	197	1	0.32849
TMEM67	0.28186	0.549967	0.38712	0.999768	198	1	0.26815
GPR26	0.28842	0.539975	0.39046	0.999768	199	1	-0.40533
ESRRA	0.30547	0.515031	0.40004	0.999768	200	1	0.49811
RNPEP	0.30663	0.513385	0.40071	0.999768	201	1	-0.0023692
FKBP11	0.31815	0.497368	0.40672	0.999768	202	1	0.16447
TMEM45A	0.32214	0.491955	0.40883	0.999768	203	1	-0.22388
DUSP4	0.32555	0.487382	0.41093	0.999768	204	1	0.35217
RAB31	0.32668	0.485877	0.41158	0.999768	205	1	-0.61126
MRGPRF	0.32781	0.484378	0.41215	0.999768	206	1	0.10514
LSS	0.32837	0.483637	0.41248	0.999768	207	1	0.11758
ANKRD11	0.33006	0.481407	0.41344	0.999768	208	1	0.49133
ATP7B	0.33343	0.476995	0.41522	0.999768	209	1	-0.067182
GNPDA2	0.33679	0.472641	0.41728	0.999768	210	1	0.2413
MRPL18	0.34234	0.465542	0.42054	0.999768	211	1	-2.4605
IGKV1D-13	0.34455	0.462748	0.42191	0.999768	212	1	-0.75422
PCP2	0.35333	0.451819	0.42707	0.999768	213	1	-0.24542
SLC38A8	0.35496	0.449821	0.42795	0.999768	214	1	-0.73356
DTX1	0.35984	0.443891	0.43065	0.999768	215	1	0.035446
ARMC10	0.36038	0.443239	0.4309	0.999768	216	1	0.20475
TRBJ2-2P	0.36345	0.439555	0.37079	0.999768	217	1	0.88377
STAM	0.3711	0.430509	0.43719	0.999768	218	1	0.55586
SOX18	0.37216	0.42927	0.4378	0.999768	219	1	0.0064429
KCTD9	0.37587	0.424962	0.44017	0.999768	220	1	0.36339
THUMPD1	0.3806	0.419531	0.443	0.999768	221	1	-0.75526
ZNF629	0.3827	0.417142	0.4443	0.999768	222	1	-0.71392
NAGPA	0.38322	0.416552	0.44468	0.999768	223	1	-0.070984
TTC7B	0.39153	0.407235	0.45001	0.999768	224	1	0.12535
HTT	0.39204	0.40667	0.45043	0.999768	225	1	0.076315
MORN4	0.39307	0.40553	0.45099	0.999768	226	1	-0.10227
KRTAP1-4	0.39359	0.404956	0.4513	0.999768	227	1	-1.0668
KIF21B	0.39564	0.4027	0.45269	0.999768	228	1	-0.61218
TDRKH	0.39616	0.402129	0.45293	0.999768	229	1	-0.049267
BNIP3L	0.39667	0.401571	0.45317	0.999768	230	1	0.49868
ANPEP	0.39769	0.400455	0.45374	0.999768	231	1	-0.3909
UNC119B	0.40228	0.395472	0.45655	0.999768	232	1	-0.42284
STUB1	0.40431	0.393286	0.45779	0.999768	233	1	0.28332
EGR3	0.40784	0.38951	0.4599	0.999768	234	1	0.18815
AMDHD2	0.41011	0.3871	0.46124	0.999768	235	1	0.11457
TNFRSF10D	0.42229	0.374389	0.46911	0.999768	236	1	0.35068
PLAG1	0.42327	0.373383	0.46961	0.999768	237	1	0.088772
FLYWCH1	0.42768	0.368881	0.4723	0.999768	238	1	-0.53915
S1PR5	0.43255	0.363964	0.47542	0.999768	239	1	0.08094
PRAP1	0.43303	0.363482	0.47573	0.999768	240	1	0.2137
DCTN2	0.434	0.36251	0.47637	0.999768	241	1	-0.68639
RP11-178C3.1	0.43508	0.361431	0.43391	0.999768	242	0	0.50381
SP140	0.43545	0.361062	0.47725	0.999768	243	1	0.084545
PSAP	0.4393	0.357239	0.47976	0.999768	244	1	0.27295
SLC33A1	0.44026	0.356291	0.48033	0.999768	245	1	0.59953
TBC1D20	0.44312	0.353479	0.48203	0.999768	246	1	0.13698
PPP1R13B	0.44455	0.352079	0.4832	0.999768	247	1	0.27856
BIN3	0.44692	0.34977	0.48489	0.999768	248	1	0.52143
FAM86C1	0.44787	0.348848	0.48549	0.999768	249	1	-0.11763
LOXL3	0.44834	0.348393	0.48584	0.999768	250	1	-0.54128
DEPDC1	0.45117	0.34566	0.48797	0.999768	251	1	-0.039291
SHMT2	0.45164	0.345208	0.48833	0.999768	252	1	0.44757
KEAP1	0.45258	0.344305	0.48904	0.999768	253	1	0.28363
FTSJ1	0.45305	0.343854	0.48933	0.999768	254	1	0.32296
STC1	0.45632	0.34073	0.49149	0.999768	255	1	0.096591
AP2A1	0.45857	0.338594	0.47865	0.999768	256	1	0.25665
NSD1	0.46051	0.336761	0.49454	0.999768	257	1	0.09928
HCN4	0.46512	0.332435	0.49761	0.999768	258	1	-0.24327
KIF17	0.4665	0.331148	0.49844	0.999768	259	1	-0.78178
MRGPRD	0.46924	0.328605	0.50038	0.999768	260	1	-0.022501
UBFD1	0.47288	0.325249	0.5028	0.999768	261	1	-0.024944
C15orf59	0.47514	0.323178	0.50442	0.999768	262	1	0.34714
SYT16	0.47875	0.319891	0.50693	0.999768	263	1	0.155
ASB7	0.48233	0.316656	0.50962	0.999768	264	1	0.18087
JMJD7	0.48322	0.315855	0.51027	0.999768	265	1	0.090241
FAM182B	0.48456	0.314652	0.51138	0.999768	266	1	-0.3871
TCERG1	0.48544	0.313864	0.51198	0.999768	267	1	-0.0079839
CDYL	0.48589	0.313462	0.51232	0.999768	268	1	-0.24277
RP11-536G4.1	0.48757	0.311963	0.48848	0.999768	269	0	-0.14534
RPL13	0.48942	0.310318	0.51488	0.999768	270	1	-1.8595
ZFAND2B	0.49206	0.307982	0.51689	0.999768	271	1	-0.078847
CYP2U1	0.4925	0.307594	0.51727	0.999768	272	1	-0.43212
P2RY6	0.49774	0.302997	0.52119	0.999768	273	1	-0.12004
PFKM	0.49817	0.302622	0.52149	0.999768	274	1	-0.45632
CABP4	0.49861	0.302239	0.52182	0.999768	275	1	-0.48807
NLRP1	0.50077	0.300362	0.52358	0.999768	276	1	-0.13181
KCND1	0.50335	0.29813	0.5255	0.999768	277	1	-0.030877
ARL8B	0.50421	0.297389	0.52609	0.999768	278	1	-0.46869
C1GALT1	0.50507	0.296648	0.52666	0.999768	279	1	1.0036
BCL2L15	0.50806	0.294085	0.52883	0.999768	280	1	0.23162
TMEM87B	0.50977	0.292626	0.53004	0.999768	281	1	0.12949
FAM160B2	0.51061	0.291911	0.5306	0.999768	282	1	-0.40166
CAPN6	0.51104	0.291545	0.53106	0.999768	283	1	0.94643
TNFRSF10C	0.51146	0.291188	0.53132	0.999768	284	1	0.31854
LIMD2	0.51231	0.290467	0.53189	0.999768	285	1	-0.69555
CASKIN1	0.51273	0.290111	0.53211	0.999768	286	1	-0.27373
UBE2A	0.51315	0.289756	0.53235	0.999768	287	1	0.11485
LRWD1	0.51358	0.289392	0.53264	0.999768	288	1	0.34916
GPALPP1	0.51903	0.284808	0.53682	0.999768	289	1	-1.1111
SIPA1L3	0.51987	0.284105	0.53751	0.999768	290	1	-1.0582
ZMYM4	0.52028	0.283763	0.53777	0.999768	291	1	0.60357
TNFRSF12A	0.52278	0.281681	0.53998	0.999768	292	1	0.24483
GNPTG	0.52361	0.280992	0.54055	0.999768	293	1	0.3212
OR10X1	0.52402	0.280652	0.54079	0.999768	294	1	0.4384
PRSS27	0.52444	0.280304	0.54115	0.999768	295	1	0.13975
TRAJ5	0.52805	0.277325	0.52778	0.999768	296	0	-0.14668
ASPDH	0.52814	0.277251	0.54389	0.999768	297	1	-0.01406
FGF6	0.52855	0.276914	0.54418	0.999768	298	1	0.33514
DNAAF2	0.53019	0.275568	0.54546	0.999768	299	1	0.25265
XRCC6BP1	0.53305	0.273232	0.54778	0.999768	300	1	0.49959
TACR3	0.53345	0.272906	0.54816	0.999768	301	1	-0.14741
OTC	0.53467	0.271914	0.54893	0.999768	302	1	0.11754
CHKB-CPT1B	0.53508	0.271581	0.54922	0.999768	303	1	-0.10341
SYTL3	0.53669	0.270276	0.55055	0.999768	304	1	-0.15537
YOD1	0.5379	0.269298	0.55142	0.999768	305	1	-0.7307
FAM170A	0.53831	0.268968	0.55171	0.999768	306	1	0.41271
RP11-794P6.2	0.53991	0.267679	0.55292	0.999768	307	1	0.51611
PURG	0.54232	0.265744	0.55448	0.999768	308	1	0.33509
KANSL1	0.54351	0.264792	0.55546	0.999768	309	1	0.80521
ZMYND12	0.54431	0.264154	0.55616	0.999768	310	1	0.24785
ALG3	0.54471	0.263835	0.55653	0.999768	311	1	0.40682
MTMR4	0.5459	0.262887	0.55735	0.999768	312	1	0.024164
ITFG1	0.54709	0.261941	0.55823	0.999768	313	1	0.28966
ACAT2	0.54946	0.260064	0.56013	0.999768	314	1	0.34253
ABCA3	0.55181	0.25821	0.56194	0.999768	315	1	0.20847
PRRG4	0.55299	0.257283	0.5629	0.999768	316	1	0.019269
CT55	0.55377	0.256671	0.56344	0.999768	317	1	-0.21585
SMOC2	0.55611	0.254839	0.56538	0.999768	318	1	-0.1812
GJD4	0.55694	0.254192	0.55981	0.999768	319	1	-0.14422
SNAP29	0.55843	0.253031	0.56712	0.999768	320	1	0.45255
UBE2J1	0.55959	0.25213	0.56814	0.999768	321	1	-0.21201
PMP22	0.55998	0.251827	0.56841	0.999768	322	1	0.1575
PNMA2	0.56036	0.251533	0.56866	0.999768	323	1	-0.20144
RP11-503N18.3	0.56046	0.251455	0.56277	0.999768	324	1	-0.49171
C1orf116	0.56267	0.249746	0.57071	0.999768	325	1	-0.89018
ZNF157	0.56305	0.249453	0.57101	0.999768	326	1	-0.20302
SMARCB1	0.56382	0.24886	0.57148	0.999768	327	1	-0.31652
IL15RA	0.5642	0.248567	0.57173	0.999768	328	1	-0.079816
IFNA14	0.56458	0.248275	0.57218	0.999768	329	1	-0.082115
C16orf78	0.56611	0.247099	0.57341	0.999768	330	1	-0.10203
AL133262.1	0.56771	0.245873	0.56777	0.999768	331	0	0.058605
DNAJC25	0.56801	0.245644	0.57494	0.999768	332	1	-0.34706
CPXM1	0.56952	0.244491	0.57627	0.999768	333	1	-0.085297
FOXE1	0.57028	0.243912	0.5771	0.999768	334	1	-0.52487
ZDHHC4	0.57103	0.243341	0.57772	0.999768	335	1	0.09477
SDC3	0.57291	0.241914	0.57912	0.999768	336	1	-0.12911
PTTG1IP	0.57404	0.241058	0.57997	0.999768	337	1	0.51605
CLEC16A	0.57478	0.240498	0.58055	0.999768	338	1	0.76997
FAM26E	0.57516	0.240211	0.58086	0.999768	339	1	0.52227
ARID1A	0.57628	0.239366	0.5818	0.999768	340	1	0.17707
SLC41A2	0.57665	0.239088	0.5821	0.999768	341	1	0.18058
DCUN1D5	0.57739	0.238531	0.5828	0.999768	342	1	0.69728
ADRB3	0.57865	0.237584	0.57947	0.999768	343	1	-1.3634
C19orf55	0.57888	0.237411	0.58403	0.999768	344	1	-0.02673
MFSD2B	0.5811	0.235749	0.58598	0.999768	345	1	0.2309
S100P	0.58146	0.23548	0.58643	0.999768	346	1	-0.41606
PEX1	0.5822	0.234928	0.58704	0.999768	347	1	0.3465
NYAP1	0.58301	0.234324	0.58343	0.999768	348	1	-0.06121
MRPL44	0.58514	0.23274	0.58966	0.999768	349	1	-0.28318
PIM2	0.5855	0.232473	0.5901	0.999768	350	1	0.46737
FAM46B	0.58623	0.231932	0.59066	0.999768	351	1	-0.27696
RP11-111M22.2	0.5866	0.231658	0.591	0.999768	352	1	0.54478
OGDH	0.58696	0.231391	0.5912	0.999768	353	1	0.0079416
YIPF5	0.58841	0.23032	0.59238	0.999768	354	1	1.0644
CCAR2	0.58896	0.229914	0.59277	0.999768	355	1	-0.19668
KRT83	0.58896	0.229914	0.59277	0.999768	356	1	-1.6614
DDA1	0.59167	0.22792	0.5951	0.999768	357	1	0.61758
JRKL	0.59203	0.227656	0.59548	0.999768	358	1	-0.11956
GJC2	0.59454	0.225819	0.59764	0.999768	359	1	-0.011095
ARHGEF17	0.5949	0.225556	0.59798	0.999768	360	1	-0.14989
ZNF235	0.59562	0.225031	0.59868	0.999768	361	1	0.024365
ERN2	0.59669	0.224251	0.59958	0.999768	362	1	0.20845
SPSB3	0.59704	0.223997	0.59992	0.999768	363	1	0.52438
CMAS	0.59918	0.222443	0.60165	0.999768	364	1	0.98788
AC022431.2	0.59989	0.221928	0.60227	0.999768	365	1	-0.27363
ANKRD24	0.60024	0.221675	0.60263	0.999768	366	1	-0.17912
NCLN	0.60165	0.220656	0.60367	0.999768	367	1	-1.0251
TRBV9	0.602	0.220404	0.60395	0.999768	368	1	-0.0013054
CLYBL	0.60236	0.220144	0.60428	0.999768	369	1	-0.94406
HEMK1	0.60306	0.219639	0.60477	0.999768	370	1	-0.067106
RRP1B	0.60411	0.218884	0.60564	0.999768	371	1	0.3425
AC145676.2	0.60485	0.218352	0.60385	0.999768	372	1	0.18599
CYP3A4	0.60516	0.21813	0.60667	0.999768	373	1	0.18484
TRAJ14	0.60569	0.21775	0.60732	0.999768	374	0	-0.23148
BBS9	0.60621	0.217377	0.60753	0.999768	375	1	0.60801
SEC16A	0.60691	0.216876	0.60818	0.999768	376	1	-1.7613
MAST2	0.6083	0.215882	0.60936	0.999768	377	1	-0.0273
TRBV5-3	0.60865	0.215632	0.60972	0.999768	378	1	0.16116
CTDNEP1	0.60899	0.21539	0.61003	0.999768	379	1	0.65794
TNIP3	0.60968	0.214898	0.6108	0.999768	380	1	0.16078
TNFRSF10A	0.61003	0.214649	0.61111	0.999768	381	1	0.18543
AL162424.1	0.61023	0.214506	0.61034	0.999768	382	0	0.37804
MYO1H	0.61038	0.2144	0.61143	0.999768	383	1	-0.5771
UBE2R2	0.61176	0.213419	0.61274	0.999768	384	1	0.2634
GPR17	0.6121	0.213178	0.61295	0.999768	385	1	-0.098686
ELTD1	0.61279	0.212688	0.61354	0.999768	386	1	-0.31758
MPND	0.61348	0.2122	0.61419	0.999768	387	1	-0.22326
PEBP4	0.61382	0.211959	0.61464	0.999768	388	1	0.06023
FKBPL	0.61416	0.211718	0.61505	0.999768	389	1	0.09261
ZRANB2	0.61553	0.210751	0.61628	0.999768	390	1	0.76467
USE1	0.61587	0.210511	0.61664	0.999768	391	1	0.21216
CTSB	0.61621	0.210271	0.61693	0.999768	392	1	-0.10335
TRAF3IP1	0.61757	0.209314	0.61829	0.999768	393	1	-0.3156
SLC25A37	0.61825	0.208836	0.61889	0.999768	394	1	0.33279
MYL4	0.61859	0.208597	0.6192	0.999768	395	1	-0.14647
ZBTB11	0.61927	0.20812	0.61972	0.999768	396	1	-0.068885
KANK3	0.62062	0.207174	0.6212	0.999768	397	1	-0.10549
C11orf87	0.62096	0.206936	0.62139	0.999768	398	1	-0.11896
ARHGAP11B	0.62129	0.206706	0.62174	0.999768	399	1	-0.85267
FGF22	0.62197	0.206231	0.62228	0.999768	400	1	0.00096637
ARMCX4	0.6223	0.206	0.62258	0.999768	401	1	-0.1901
SLC1A1	0.62297	0.205533	0.62317	0.999768	402	1	-0.078887
ZNF397	0.62331	0.205296	0.62348	0.999768	403	1	0.15163
AC069547.2	0.62398	0.204829	0.62397	0.999768	404	1	-0.47105
ALDH3A2	0.62532	0.203898	0.62541	0.999768	405	1	0.28343
WDR75	0.62658	0.203023	0.62686	0.999768	406	0	-1.901
KCNH3	0.62665	0.202975	0.62667	0.999768	407	1	-0.31608
CCDC40	0.62698	0.202746	0.62698	0.999768	408	1	0.054187
AQR	0.62718	0.202608	0.62736	0.999768	409	0	-0.33453
NRBP2	0.62864	0.201598	0.62836	0.999768	410	1	-1.5689
CHPF2	0.6293	0.201142	0.62892	0.999768	411	1	0.39318
DHX57	0.62996	0.200687	0.62951	0.999768	412	1	-0.16289
NACA	0.63062	0.200232	0.63005	0.999768	413	1	-0.43398
SCN11A	0.63095	0.200005	0.6303	0.999768	414	1	-0.48898
TCFL5	0.63161	0.199551	0.63089	0.999768	415	1	-0.75851
KRTAP23-1	0.63194	0.199324	0.63124	0.999768	416	1	0.41599
C12orf45	0.63226	0.199104	0.63162	0.999768	417	1	-0.085465
AC004899.1	0.63357	0.198205	0.63288	0.999768	418	1	0.061934
ZNF205	0.6339	0.197979	0.63312	0.999768	419	1	-0.32179
RASA4B	0.63521	0.197083	0.63457	0.999768	420	1	-0.3008
NLRP6	0.63586	0.196638	0.63527	0.999768	421	1	-0.35849
FBXO16	0.63651	0.196195	0.63587	0.999768	422	1	0.56281
PAPOLG	0.63715	0.195758	0.63666	0.999768	423	1	0.31051
ADORA2B	0.64006	0.193779	0.63936	0.999768	424	1	-0.48575
NSRP1	0.64102	0.193128	0.64033	0.999768	425	1	0.29419
PDE7A	0.64135	0.192905	0.64066	0.999768	426	1	-0.6311
LRP8	0.64263	0.192039	0.64184	0.999768	427	1	0.28026
SCGB1C1	0.64295	0.191823	0.64214	0.999768	428	1	-0.65424
BHLHE22	0.6439	0.191182	0.64314	0.999768	429	1	0.17298
SATL1	0.64454	0.19075	0.64364	0.999768	430	1	0.64315
ZC3H12C	0.64486	0.190535	0.64392	0.999768	431	1	0.052923
PLK5	0.64581	0.189895	0.64495	0.999768	432	1	-0.094609
MAP1A	0.64676	0.189257	0.64606	0.999768	433	1	0.082139
STRA8	0.64708	0.189042	0.64638	0.999768	434	1	-0.24485
MYH11	0.64897	0.187775	0.6483	0.999768	435	0	-0.096528
STMN4	0.65148	0.186099	0.65107	0.999768	436	0	-0.056624
TBCK	0.6521	0.185686	0.65184	0.999768	437	0	0.46187
NFKB1	0.65273	0.185266	0.65242	0.999768	438	0	-0.60702
AL360181.1	0.65295	0.18512	0.65318	0.999768	439	0	-0.0074457
NR0B1	0.65366	0.184648	0.65329	0.999768	440	0	-0.29176
AASS	0.65428	0.184236	0.65393	0.999768	441	0	0.049328
PIWIL2	0.65459	0.184031	0.65422	0.999768	442	0	0.45495
WDR91	0.65552	0.183414	0.65509	0.999768	443	0	0.11322
OR10G7	0.65645	0.182798	0.65613	0.999768	444	0	0.10618
CH25H	0.65676	0.182593	0.65634	0.999768	445	0	-0.035894
GUCA1A	0.65706	0.182395	0.65647	0.999768	446	0	0.20505
RNF175	0.65768	0.181985	0.65706	0.999768	447	0	0.24738
KCNJ13	0.65829	0.181583	0.65777	0.999768	448	0	-0.93263
VPS13A	0.65952	0.180772	0.65883	0.999768	449	0	0.4938
SLC39A14	0.65983	0.180568	0.65915	0.999768	450	0	0.30317
LRRC10B	0.66044	0.180167	0.65976	0.999768	451	0	0.32449
MROH8	0.66105	0.179766	0.66055	0.999768	452	0	-0.86377
ZNF512	0.66135	0.179569	0.66086	0.999768	453	0	0.12383
COX6A1P2	0.66166	0.179365	0.66125	0.999768	454	0	-0.11378
NEK1	0.66257	0.178768	0.66209	0.999768	455	0	0.11453
IL4	0.66287	0.178572	0.66245	0.999768	456	0	0.62537
SLC5A10	0.66348	0.178172	0.66305	0.999768	457	0	-0.19685
CDKN2A	0.66679	0.176011	0.66633	0.999768	458	0	-0.82798
RFC1	0.66709	0.175816	0.66668	0.999768	459	0	-0.18044
MASP2	0.66769	0.175425	0.66726	0.999768	460	0	-0.3772
ARMS2	0.66799	0.17523	0.66753	0.999768	461	0	-0.59883
CCDC8	0.66949	0.174256	0.66894	0.999768	462	0	0.27823
ZNF311	0.67008	0.173873	0.66952	0.999768	463	0	0.22207
GPR27	0.67038	0.173679	0.66983	0.999768	464	0	-3.9701
CLCN5	0.67157	0.172909	0.67111	0.999768	465	0	0.87487
CLN8	0.67216	0.172527	0.67176	0.999768	466	0	0.068614
USP35	0.67304	0.171959	0.67282	0.999768	467	0	0.25164
SLC18A1	0.67363	0.171579	0.6733	0.999768	468	0	0.23279
LRRN3	0.67393	0.171385	0.67358	0.999768	469	0	-0.030432
MTRNR2L12	0.67471	0.170883	0.6752	0.999768	470	0	0.55235
SPSB1	0.6751	0.170632	0.67484	0.999768	471	0	-0.2883
SH2D3C	0.67628	0.169873	0.67576	0.999768	472	0	0.035453
CGA	0.67715	0.169315	0.67666	0.999768	473	0	0.036659
ZNF576	0.67774	0.168937	0.67731	0.999768	474	0	0.12052
MAP2K5	0.67948	0.167823	0.67897	0.999768	475	0	-0.13642
KRTAP3-3	0.68006	0.167453	0.67957	0.999768	476	0	0.010027
ADH1C	0.68093	0.166898	0.68049	0.999768	477	0	-0.34153
AC011239.1	0.68208	0.166165	0.68174	0.999768	478	0	0.32547
SLC31A2	0.68237	0.16598	0.68196	0.999768	479	0	0.17417
RAB3GAP2	0.68265	0.165802	0.68219	0.999768	480	0	-0.3893
SLC26A8	0.68294	0.165617	0.68248	0.999768	481	0	0.39273
SLC52A3	0.68323	0.165433	0.68273	0.999768	482	0	-0.66958
PTPLAD1	0.68351	0.165255	0.68304	0.999768	483	0	0.043324
DCUN1D1	0.68665	0.163265	0.68615	0.999768	484	0	0.1151
RPL3L	0.68722	0.162904	0.68664	0.999768	485	0	0.35914
OXCT2	0.68779	0.162544	0.68712	0.999768	486	0	0.07124
DPYSL2	0.68835	0.162191	0.68766	0.999768	487	0	-0.074157
TSPAN3	0.68976	0.161302	0.68921	0.999768	488	0	-0.088075
DNTTIP2	0.69117	0.160415	0.69049	0.999768	489	0	-0.066453
MTMR9	0.69229	0.159712	0.69168	0.999768	490	0	0.034382
NSDHL	0.6934	0.159016	0.69285	0.999768	491	0	0.7346
AMOTL1	0.69479	0.158146	0.69423	0.999768	492	0	0.19168
PAQR9	0.69507	0.157971	0.69442	0.999768	493	0	-0.61742
DDX26B	0.69535	0.157797	0.69462	0.999768	494	0	0.25762
LRRC37B	0.69673	0.156935	0.69572	0.999768	495	0	0.19163
OTUD5	0.697	0.156767	0.69599	0.999768	496	0	0.17054
AMN1	0.69728	0.156593	0.69627	0.999768	497	0	0.36315
HR	0.69755	0.156425	0.69646	0.999768	498	0	0.013166
ZSWIM3	0.69783	0.15625	0.69678	0.999768	499	0	0.38262
RIOK3	0.69838	0.155908	0.6973	0.999768	500	0	0.40947
KRTAP9-6	0.69893	0.155566	0.69787	0.999768	501	0	0.78918
ADK	0.70057	0.154548	0.69965	0.999768	502	0	-0.13329
CCM2L	0.70084	0.154381	0.69993	0.999768	503	0	0.049873
AP000867.1	0.70138	0.154047	0.70042	0.999768	504	0	-0.008226
ZC3H10	0.70166	0.153873	0.70065	0.999768	505	0	-0.10692
FRMD5	0.7022	0.153539	0.70118	0.999768	506	0	-0.13717
C11orf53	0.70247	0.153372	0.70143	0.999768	507	0	0.28839
MFSD1	0.70328	0.152872	0.70235	0.999768	508	0	0.14933
ENTPD4	0.70355	0.152705	0.70261	0.999768	509	0	0.18961
RAB2A	0.70463	0.152039	0.70374	0.999768	510	0	0.5507
IGLV11-55	0.70624	0.151048	0.70536	0.999768	511	0	-0.075848
PRDX2	0.70651	0.150882	0.70555	0.999768	512	0	-1.1109
R3HCC1L	0.70678	0.150716	0.70575	0.999768	513	0	0.27346
RBM48	0.70865	0.149568	0.70756	0.999768	514	0	0.16908
DERL1	0.70971	0.148919	0.70875	0.999768	515	0	-0.54149
NPFFR2	0.71077	0.148271	0.70983	0.999768	516	0	0.1248
ZC3H13	0.7113	0.147947	0.71033	0.999768	517	0	-0.11067
THBD	0.71366	0.146509	0.71268	0.999768	518	0	-0.57138
CRELD2	0.71419	0.146186	0.71323	0.999768	519	0	-0.43531
ATP11C	0.71523	0.145554	0.71446	0.999768	520	0	0.21725
SLC35A1	0.71575	0.145239	0.71506	0.999768	521	0	0.79503
ARMC12	0.71601	0.145081	0.71531	0.999768	522	0	-0.1029
GPS2	0.71627	0.144923	0.71556	0.999768	523	0	0.058039
GPR15	0.71653	0.144766	0.71585	0.999768	524	0	-0.09009
SFTPA2	0.71731	0.144293	0.71668	0.999768	525	0	0.42066
SENP8	0.71757	0.144136	0.71697	0.999768	526	0	0.20256
DCLRE1A	0.71886	0.143356	0.71818	0.999768	527	0	0.017362
SOX14	0.71963	0.142891	0.71896	0.999768	528	0	-0.91767
PDXDC1	0.72014	0.142583	0.71939	0.999768	529	0	0.064939
PRR25	0.7227	0.141042	0.72193	0.999768	530	0	-0.73037
ANGPTL7	0.72321	0.140736	0.72244	0.999768	531	0	-0.33217
March	0.72498	0.139674	0.72411	0.999768	532	0	-0.23165
PTK2B	0.72574	0.139219	0.72483	0.999768	533	0	-0.19741
MTNR1A	0.72599	0.139069	0.72511	0.999768	534	0	-0.55505
DLAT	0.72649	0.13877	0.72563	0.999768	535	0	0.53123
EFCAB7	0.72699	0.138472	0.72622	0.999768	536	0	-0.21991
ZNF491	0.72824	0.137725	0.72758	0.999768	537	0	0.24104
ZNF540	0.72874	0.137427	0.7281	0.999768	538	0	0.18355
XPR1	0.72974	0.136832	0.72917	0.999768	539	0	-0.16743
NT5DC2	0.73048	0.136392	0.72999	0.999768	540	0	-0.49175
HGD	0.73098	0.136095	0.73055	0.999768	541	0	-0.7849
UBA5	0.73246	0.135216	0.73189	0.999768	542	0	-0.66498
CABP2	0.73345	0.134629	0.73292	0.999768	543	0	-0.21553
NHLH2	0.73369	0.134487	0.73311	0.999768	544	0	0.39991
IQCJ	0.73394	0.134339	0.73343	0.999768	545	0	-0.77429
IZUMO1	0.73418	0.134197	0.73374	0.999768	546	0	-0.076184
EPHA7	0.73638	0.132898	0.73608	0.999768	547	0	0.05681
LY6K	0.73662	0.132756	0.73634	0.999768	548	0	-0.54553
SP8	0.73694	0.132568	0.7361	0.999768	549	0	0.10175
DMXL1	0.73759	0.132185	0.73726	0.999768	550	0	0.4036
SSTR2	0.73856	0.131614	0.73803	0.999768	551	0	-0.15884
GRXCR1	0.73928	0.131191	0.73864	0.999768	552	0	0.017664
PPP3CC	0.74024	0.130627	0.73962	0.999768	553	0	-0.10586
KRT7	0.74072	0.130346	0.74017	0.999768	554	0	-0.052024
CDKN1A	0.74144	0.129924	0.74102	0.999768	555	0	-0.19769
OR5P2	0.74239	0.129368	0.742	0.999768	556	0	0.1505
C8orf37	0.74334	0.128812	0.74298	0.999768	557	0	0.10195
C4orf51	0.74358	0.128672	0.74318	0.999768	558	0	0.47197
PCDHGA1	0.74382	0.128532	0.74354	0.999768	559	0	-0.41312
TMPRSS5	0.74429	0.128258	0.74406	0.999768	560	0	0.48763
NRTN	0.74476	0.127984	0.74453	0.999768	561	0	-0.48065
MIXL1	0.74524	0.127704	0.74493	0.999768	562	0	-0.095298
KIAA1377	0.74547	0.12757	0.74526	0.999768	563	0	0.26996
RCBTB2	0.74688	0.126749	0.7468	0.999768	564	0	0.13497
TMEM66	0.74712	0.12661	0.74704	0.999768	565	0	0.080934
SORBS3	0.7477	0.126273	0.74768	0.999768	566	0	-0.18606
OR13C8	0.74805	0.126069	0.7481	0.999768	567	0	-0.22702
THSD4	0.74852	0.125797	0.74845	0.999768	568	0	0.018108
NNAT	0.74898	0.12553	0.74899	0.999768	569	0	0.011269
FGF17	0.74922	0.125391	0.74915	0.999768	570	0	0.17132
OR2L2	0.74945	0.125257	0.74936	0.999768	571	0	-0.0036564
EXPH5	0.74968	0.125124	0.74958	0.999768	572	0	-0.034313
EIF3K	0.74991	0.124991	0.74991	0.999768	573	0	0.030066
SYCE2	0.75038	0.124719	0.75036	0.999768	574	0	-0.49658
FBN1	0.7513	0.124187	0.75126	0.999768	575	0	-0.55975
EPHA3	0.75176	0.123921	0.75179	0.999768	576	0	0.18964
RGS10	0.75199	0.123788	0.75204	0.999768	577	0	-0.59764
ZNF503	0.75222	0.123655	0.75224	0.999768	578	0	-0.8712
MYCT1	0.75248	0.123505	0.7514	0.999768	579	0	-0.091219
OTOA	0.75337	0.122992	0.75337	0.999768	580	0	0.42824
AL929472.1	0.7537	0.122801	0.75431	0.999768	581	0	0.13911
SNX30	0.75405	0.1226	0.75418	0.999768	582	0	-1.1241
LGALS7B	0.75451	0.122335	0.75467	0.999768	583	0	0.15607
C16orf96	0.75542	0.121812	0.75566	0.999768	584	0	0.31882
PRSS35	0.75565	0.121679	0.75587	0.999768	585	0	0.003972
PBX3	0.7561	0.121421	0.7563	0.999768	586	0	-0.31001
SLC7A9	0.75746	0.12064	0.75753	0.999768	587	0	0.2704
C15orf43	0.75813	0.120256	0.75826	0.999768	588	0	0.19232
LPCAT3	0.75858	0.119999	0.75866	0.999768	589	0	0.12802
GDPD2	0.75881	0.119867	0.75896	0.999768	590	0	0.31362
NLRC3	0.76015	0.119101	0.76018	0.999768	591	0	-0.1787
LYPD6	0.76038	0.118969	0.76045	0.999768	592	0	-0.19159
IGDCC3	0.76082	0.118718	0.76096	0.999768	593	0	0.20275
SLC10A2	0.76149	0.118336	0.76167	0.999768	594	0	-0.49262
TNNT1	0.76193	0.118085	0.76208	0.999768	595	0	-0.16164
BAK1	0.7626	0.117703	0.76276	0.999768	596	0	0.16591
SURF4	0.76326	0.117327	0.76346	0.999768	597	0	0.18677
NUDT18	0.76414	0.116827	0.76443	0.999768	598	0	0.41746
KCNK2	0.76436	0.116702	0.76462	0.999768	599	0	-0.29933
FBXO6	0.7648	0.116452	0.76506	0.999768	600	0	-0.20214
GDI2	0.76524	0.116202	0.76542	0.999768	601	0	0.49583
MYH4	0.76611	0.115709	0.76655	0.999768	602	0	0.060725
MSI2	0.76764	0.114842	0.76816	0.999768	603	0	0.058601
PDE8B	0.76829	0.114475	0.76895	0.999768	604	0	-0.16727
ATP1B2	0.77001	0.113504	0.77048	0.999768	605	0	-0.087161
RASGEF1A	0.77023	0.11338	0.77068	0.999768	606	0	-1.3521
ATP9B	0.77258	0.112057	0.77295	0.999768	607	0	0.18197
FAM9B	0.77343	0.111579	0.77388	0.999768	608	0	0.32882
C15orf52	0.77385	0.111343	0.77434	0.999768	609	0	-0.89092
PTGER4	0.77428	0.111102	0.77464	0.999768	610	0	0.31091
PBX4	0.7747	0.110866	0.77513	0.999768	611	0	-0.11913
RIT2	0.77491	0.110749	0.77537	0.999768	612	0	0.41649
ESCO2	0.77512	0.110631	0.77551	0.999768	613	0	0.28059
USP9Y	0.77659	0.109808	0.77701	0.999768	614	0	-0.041996
AMPD1	0.77764	0.109221	0.77797	0.999768	615	0	0.061979
TTC12	0.77826	0.108875	0.77854	0.999768	616	0	-0.011916
TMPRSS2	0.77868	0.108641	0.77888	0.999768	617	0	-0.0034454
CYP46A1	0.77889	0.108524	0.77907	0.999768	618	0	-0.98646
DMWD	0.78033	0.107722	0.78067	0.999768	619	0	-0.58979
ANO10	0.78116	0.10726	0.78144	0.999768	620	0	0.41101
INPP5E	0.78259	0.106466	0.78292	0.999768	621	0	-0.32752
TNPO2	0.78341	0.106011	0.78372	0.999768	622	0	0.35174
CLEC1A	0.78361	0.1059	0.78389	0.999768	623	0	0.26066
CHMP7	0.78382	0.105784	0.78416	0.999768	624	0	0.15022
PARPBP	0.78402	0.105673	0.78439	0.999768	625	0	0.45755
C17orf53	0.78443	0.105446	0.78486	0.999768	626	0	-0.055469
PFKL	0.78524	0.104998	0.78555	0.999768	627	0	-0.39611
ZNF423	0.78584	0.104666	0.7861	0.999768	628	0	-0.5719
LDHAL6A	0.78604	0.104555	0.78639	0.999768	629	0	-0.2932
FAM71F1	0.78665	0.104218	0.78699	0.999768	630	0	-0.014537
SH3RF3	0.78685	0.104108	0.78723	0.999768	631	0	-0.61655
HTR1F	0.78705	0.103998	0.78738	0.999768	632	0	0.32028
CAMK2B	0.78825	0.103336	0.78845	0.999768	633	0	0.020966
HNRNPR	0.78845	0.103226	0.78868	0.999768	634	0	-0.20166
PIGP	0.78865	0.103116	0.78891	0.999768	635	0	0.034289
MUT	0.78964	0.102571	0.79003	0.999768	636	0	0.034927
UMOD	0.78984	0.102461	0.79018	0.999768	637	0	0.39256
KPNB1	0.79036	0.102175	0.78957	0.999768	638	0	-2.5882
MTMR3	0.79043	0.102137	0.79078	0.999768	639	0	-0.18535
PBK	0.79142	0.101593	0.79187	0.999768	640	0	-0.13285
SMIM10	0.79181	0.101379	0.79232	0.999768	641	0	0.0042192
CANT1	0.79201	0.101269	0.79251	0.999768	642	0	0.25838
F11	0.79358	0.100409	0.79422	0.999768	643	0	-0.010602
METTL2B	0.79552	0.0993489	0.79603	0.999768	644	0	-0.3642
FOXN3	0.79687	0.0986125	0.79735	0.999768	645	0	0.16191
KIAA1958	0.79706	0.098509	0.79753	0.999768	646	0	-0.30259
WBP5	0.8003	0.0967472	0.80076	0.999768	647	0	-0.21976
HECW2	0.80087	0.096438	0.8013	0.999768	648	0	0.0072127
CD9	0.80219	0.0957228	0.80258	0.999768	649	0	-0.31379
MEIS2	0.80275	0.0954197	0.80301	0.999768	650	0	-0.075766
CARD16	0.80387	0.0948142	0.80395	0.999768	651	0	0.10676
REEP4	0.80462	0.0944092	0.80472	0.999768	652	0	-0.073577
CHRM2	0.8048	0.094312	0.80487	0.999768	653	0	-0.12676
TMLHE	0.80517	0.0941124	0.80521	0.999768	654	0	-0.46584
AKR7L	0.80526	0.0940639	0.80487	0.999768	655	0	-0.20954
TMPRSS11A	0.80591	0.0937135	0.80584	0.999768	656	0	0.27035
SH3D21	0.8061	0.0936111	0.806	0.999768	657	0	0.035246
METTL24	0.80646	0.0934172	0.80627	0.999768	658	0	0.39959
PIM1	0.80665	0.0933149	0.80646	0.999768	659	0	0.21945
RP11-362K2.2	0.80683	0.093218	0.80666	0.999768	660	0	0.33605
OR10J4	0.80702	0.0931157	0.80686	0.999768	661	0	0.093425
ZNF579	0.80939	0.0918422	0.80945	0.999768	662	0	-0.22995
LMTK2	0.81245	0.0902034	0.81246	0.999768	663	0	-0.70015
ZNF682	0.81263	0.0901071	0.81268	0.999768	664	0	-0.1198
AP3D1	0.81299	0.0899148	0.81307	0.999768	665	0	-0.6462
SPG20	0.81353	0.0896264	0.8135	0.999768	666	0	-0.32271
PADI1	0.8137	0.0895357	0.8138	0.999768	667	0	0.10427
AC040160.1	0.81494	0.0888744	0.81492	0.999768	668	0	-0.25618
EMC8	0.8153	0.0886826	0.81524	0.999768	669	0	0.66276
G6PC	0.81547	0.088592	0.81546	0.999768	670	0	0.19916
ABCC2	0.81583	0.0884003	0.81587	0.999768	671	0	-0.16578
PDSS1	0.816	0.0883098	0.81614	0.999768	672	0	-4.6103
ZUFSP	0.81635	0.0881236	0.8165	0.999768	673	0	-0.1305
ACSM5	0.81758	0.0874697	0.81784	0.999768	674	0	0.052701
PTGS1	0.81793	0.0872839	0.81812	0.999768	675	0	0.28025
ZIC5	0.8188	0.0868222	0.81891	0.999768	676	0	-0.31518
DPYD	0.81949	0.0864563	0.81977	0.999768	677	0	-0.33176
NAA60	0.8207	0.0858156	0.82096	0.999768	678	0	0.32051
ZNF365	0.82121	0.0855458	0.82154	0.999768	679	0	0.1236
LRRC41	0.8236	0.0842837	0.82418	0.999768	680	0	0.2794
MTMR6	0.82427	0.0839305	0.82477	0.999768	681	0	0.4076
PFKFB1	0.82478	0.0836619	0.82532	0.999768	682	0	-0.11313
OSMR	0.82512	0.0834829	0.82571	0.999768	683	0	-0.19087
SCYL3	0.82579	0.0831304	0.82647	0.999768	684	0	-0.43963
TRBV27	0.82595	0.0830462	0.82657	0.999768	685	0	0.31268
R3HCC1	0.82696	0.0825155	0.82761	0.999768	686	0	-0.28654
ZNF783	0.82729	0.0823422	0.82801	0.999768	687	0	0.15257
TVP23A	0.82745	0.0822582	0.82816	0.999768	688	0	-0.088958
ZNF44	0.82762	0.082169	0.82833	0.999768	689	0	0.45992
ARL5B	0.82779	0.0820798	0.8285	0.999768	690	0	-0.07171
USP32	0.82845	0.0817337	0.82922	0.999768	691	0	-0.21246
SNX5	0.82878	0.0815607	0.82958	0.999768	692	0	0.30089
PLTP	0.82911	0.0813878	0.82996	0.999768	693	0	0.1436
C8orf86	0.82944	0.081215	0.83021	0.999768	694	0	0.053787
EPT1	0.83026	0.0807859	0.83105	0.999768	695	0	0.41777
HSD17B2	0.83091	0.080446	0.83166	0.999768	696	0	-0.099075
CCDC27	0.83269	0.0795167	0.83339	0.999768	697	0	-0.55316
PAEP	0.83398	0.0788444	0.8345	0.999768	698	0	-0.62284
HDX	0.83414	0.0787611	0.83463	0.999768	699	0	0.16232
PPDPF	0.83462	0.0785112	0.83498	0.999768	700	0	-0.31493
ZNF852	0.83478	0.078428	0.83512	0.999768	701	0	-0.37457
SSR3	0.83605	0.0777677	0.83662	0.999768	702	0	0.24273
TTPA	0.83653	0.0775185	0.83699	0.999768	703	0	0.046623
BIRC6	0.83842	0.0765384	0.83897	0.999768	704	0	-0.45359
AC139426.2	0.83997	0.0757362	0.84049	0.999768	705	0	0.054285
TDRD1	0.84044	0.0754933	0.84097	0.999768	706	0	-0.50991
PTEN	0.8409	0.0752556	0.84153	0.999768	707	0	-0.012376
DKFZP667F0711	0.84121	0.0750956	0.84181	0.999768	708	0	0.079088
PAX2	0.84152	0.0749356	0.84203	0.999768	709	0	-1.1556
POF1B	0.84167	0.0748582	0.84221	0.999768	710	0	-0.48785
CCDC25	0.8429	0.0742239	0.84342	0.999768	711	0	0.11406
SLC24A3	0.84305	0.0741467	0.84356	0.999768	712	0	-0.58462
DNAJB13	0.84335	0.0739922	0.84393	0.999768	713	0	0.28476
CFP	0.84351	0.0739098	0.84409	0.999768	714	0	0.049659
ABCA1	0.84427	0.0735186	0.84496	0.999768	715	0	-0.22169
TRPM4	0.84562	0.0728248	0.84643	0.999768	716	0	-0.12668
STK40	0.84622	0.0725167	0.84707	0.999768	717	0	-0.063302
IL22RA2	0.84652	0.0723628	0.84735	0.999768	718	0	0.26833
SLC25A53	0.84727	0.0719782	0.84804	0.999768	719	0	0.20471
MDH1B	0.84801	0.071599	0.84875	0.999768	720	0	-0.085956
LANCL2	0.8486	0.071297	0.84926	0.999768	721	0	-0.068315
ZNF532	0.8489	0.0711435	0.84952	0.999768	722	0	0.14355
FHL3	0.84904	0.0710718	0.84969	0.999768	723	0	-0.58231
KIAA1009	0.85007	0.0705453	0.85054	0.999768	724	0	0.46254
NADSYN1	0.85022	0.0704687	0.85063	0.999768	725	0	0.43047
SOWAHA	0.85036	0.0703972	0.8508	0.999768	726	0	-0.89535
LYRM1	0.85065	0.0702491	0.85102	0.999768	727	0	-0.32013
MLXIPL	0.85225	0.069433	0.85273	0.999768	728	0	0.45796
FGD5	0.85268	0.0692139	0.85312	0.999768	729	0	-0.0089131
C15orf37	0.85511	0.067978	0.85561	0.999768	730	0	0.058283
MST4	0.85554	0.0677597	0.856	0.999768	731	0	-0.65127
SFTPC	0.85568	0.0676886	0.85616	0.999768	732	0	0.0076136
LRPPRC	0.8563	0.0673741	0.85533	0.999768	733	0	-0.88851
NT5M	0.85652	0.0672625	0.85687	0.999768	734	0	0.5282
KLRG2	0.85681	0.0671155	0.85717	0.999768	735	0	-0.53744
OR52R1	0.85695	0.0670445	0.85734	0.999768	736	0	-0.30734
EDNRA	0.85792	0.0665532	0.85806	0.999768	737	0	0.0079933
DUSP10	0.8582	0.0664115	0.85832	0.999768	738	0	-0.14095
UBE2E3	0.85834	0.0663406	0.85846	0.999768	739	0	-0.092868
RNF169	0.85931	0.0658501	0.85931	0.999768	740	0	0.22509
ELMSAN1	0.86096	0.065017	0.86085	0.999768	741	0	-0.87478
LRTM1	0.8611	0.0649464	0.86101	0.999768	742	0	0.38244
CLU	0.86137	0.0648103	0.86122	0.999768	743	0	0.45946
MFSD11	0.86151	0.0647397	0.86136	0.999768	744	0	-0.1086
LPL	0.86313	0.0639238	0.86285	0.999768	745	0	-0.46032
TNRC6B	0.8634	0.063788	0.86314	0.999768	746	0	-0.46615
DCBLD1	0.8638	0.0635868	0.86343	0.999768	747	0	-0.086325
CEMP1	0.86421	0.0633807	0.86385	0.999768	748	0	0.13254
XPOT	0.86434	0.0633154	0.86395	0.999768	749	0	0.24466
HSD17B7	0.86514	0.0629136	0.86473	0.999768	750	0	0.20566
NRBP1	0.8662	0.0623818	0.8658	0.999768	751	0	-0.183
SPG11	0.86673	0.0621162	0.86621	0.999768	752	0	0.041078
ST18	0.86686	0.062051	0.86632	0.999768	753	0	-0.025043
BNC1	0.86699	0.0619859	0.86649	0.999768	754	0	-0.10681
TAS2R31	0.86752	0.0617205	0.86719	0.999768	755	0	0.16093
C6orf47	0.86998	0.0604907	0.86992	0.999768	756	0	-0.31498
LGI3	0.87152	0.0597226	0.87139	0.999768	757	0	0.24229
FAM192A	0.87164	0.0596628	0.87154	0.999768	758	0	-0.25697
ST8SIA2	0.87203	0.0594686	0.8718	0.999768	759	0	-0.35484
KIFC1	0.87253	0.0592196	0.87233	0.999768	760	0	-0.48218
SLC19A1	0.87278	0.0590952	0.87266	0.999768	761	0	-0.21684
CWF19L2	0.87417	0.0584041	0.87393	0.999768	762	0	-0.20416
MAGEB2	0.87566	0.0576645	0.87544	0.999768	763	0	0.31223
CLPP	0.87578	0.057605	0.87552	0.999768	764	0	-1.1583
CCNJL	0.87615	0.0574215	0.87584	0.999768	765	0	0.15719
SPATA21	0.87709	0.0569558	0.87591	0.999768	766	0	0.1726
ERMP1	0.87738	0.0568123	0.87724	0.999768	767	0	-0.090787
NAMPTL	0.87774	0.0566341	0.87763	0.999768	768	0	0.1167
SLC25A35	0.87811	0.0564511	0.87796	0.999768	769	0	-0.64103
NXPE4	0.87835	0.0563324	0.87821	0.999768	770	0	0.34162
ZNF490	0.87847	0.0562731	0.87832	0.999768	771	0	-0.064881
XPO7	0.87883	0.0560951	0.87875	0.999768	772	0	0.45416
MAN2C1	0.87956	0.0557345	0.87957	0.999768	773	0	-0.31551
CAMSAP2	0.88087	0.0550882	0.88077	0.999768	774	0	-0.56814
CD180	0.88206	0.0545019	0.88196	0.999768	775	0	0.46873
ALKBH8	0.88229	0.0543886	0.88217	0.999768	776	0	-0.12692
ATL1	0.883	0.0540393	0.88294	0.999768	777	0	-0.13443
TP53TG3	0.88323	0.0539262	0.88315	0.999768	778	0	-0.99992
CDC20B	0.88335	0.0538672	0.88325	0.999768	779	0	0.10694
KLF11	0.88346	0.0538131	0.88334	0.999768	780	0	-0.7858
NEFM	0.88439	0.0533562	0.88441	0.999768	781	0	-0.050092
MT1H	0.88451	0.0532973	0.88455	0.999768	782	0	-0.47926
AK1	0.88532	0.0528997	0.88529	0.999768	783	0	-0.71283
OSER1	0.88623	0.0524536	0.88617	0.999768	784	0	0.20609
ROCK2	0.88657	0.052287	0.88657	0.999768	785	0	-0.25161
BTK	0.8868	0.0521743	0.88675	0.999768	786	0	0.28118
HCAR3	0.88703	0.0520617	0.88701	0.999768	787	0	-0.38221
PHYHIP	0.88714	0.0520078	0.88719	0.999768	788	0	-0.027876
ACTG2	0.88725	0.051954	0.88732	0.999768	789	0	-0.16272
ENO4	0.88782	0.0516751	0.88788	0.999768	790	0	0.099124
MAP1LC3B	0.88849	0.0513475	0.88847	0.999768	791	0	-1.3951
GLB1L2	0.88883	0.0511813	0.88886	0.999768	792	0	-0.24627
ZNF208	0.88961	0.0508003	0.8897	0.999768	793	0	-0.29643
CLDN6	0.89005	0.0505856	0.89011	0.999768	794	0	0.020007
ACTL6B	0.89082	0.05021	0.89076	0.999768	795	0	-0.30411
PPP1R3C	0.89093	0.0501564	0.89086	0.999768	796	0	-0.42152
LRRC28	0.89104	0.0501028	0.89101	0.999768	797	0	-0.21186
PROZ	0.89181	0.0497277	0.89173	0.999768	798	0	0.19946
GXYLT1	0.89235	0.0494648	0.89224	0.999768	799	0	0.25489
B3GALNT2	0.89279	0.0492507	0.89268	0.999768	800	0	0.0068352
TRHDE	0.89311	0.049095	0.89297	0.999768	801	0	-0.14509
SLC22A4	0.89365	0.0488325	0.89357	0.999768	802	0	-0.59891
IL10RB	0.89472	0.0483129	0.89463	0.999768	803	0	-1.1615
AP5S1	0.89536	0.0480023	0.89521	0.999768	804	0	0.29541
DMTN	0.89599	0.0476968	0.89594	0.999768	805	0	0.18763
SEC11A	0.89766	0.0468881	0.89741	0.999768	806	0	0.072108
MGAT5B	0.89777	0.0468349	0.89749	0.999768	807	0	-0.16804
KCNE4	0.89808	0.046685	0.89779	0.999768	808	0	-0.27043
MGMT	0.89818	0.0466366	0.89794	0.999768	809	0	-0.22363
FOXB2	0.89859	0.0464384	0.89842	0.999768	810	0	0.17713
GLYR1	0.8988	0.0463369	0.89872	0.999768	811	0	0.29107
TRIM35	0.89992	0.0457961	0.89977	0.999768	812	0	0.020693
IGF2	0.90012	0.0456996	0.90006	0.999768	813	0	0.45726
SEC62	0.90083	0.0453572	0.90082	0.999768	814	0	-0.049861
TMPRSS11D	0.90144	0.0450632	0.90139	0.999768	815	0	-0.12729
LDOC1	0.90184	0.0448705	0.90184	0.999768	816	0	-0.068404
SLC51B	0.90293	0.0443459	0.90284	0.999768	817	0	-0.10741
AREL1	0.90372	0.0439661	0.9036	0.999768	818	0	-0.9135
CP	0.90401	0.0438268	0.90391	0.999768	819	0	0.12401
CHRNA2	0.90411	0.0437787	0.904	0.999768	820	0	0.10126
QRICH1	0.90508	0.043313	0.90492	0.999768	821	0	-0.88942
IFT52	0.90518	0.0432651	0.90505	0.999768	822	0	-0.45449
HINT1	0.90528	0.0432171	0.90511	0.999768	823	0	-0.10831
KCNK7	0.90557	0.043078	0.90536	0.999768	824	0	-0.052596
ADAM7	0.90624	0.0427568	0.9061	0.999768	825	0	0.38195
ANKRD44	0.90634	0.0427089	0.90618	0.999768	826	0	-0.35259
TRIM45	0.90653	0.0426178	0.90633	0.999768	827	0	0.18398
KIF5C	0.90662	0.0425747	0.9064	0.999768	828	0	-0.55189
MAP3K7	0.90795	0.0419381	0.90767	0.999768	829	0	-1.6929
AGAP3	0.90917	0.0413549	0.90891	0.999768	830	0	-0.19877
USP28	0.91084	0.0405579	0.9104	0.999768	831	0	0.072432
GGTLC1	0.91102	0.0404721	0.91058	0.999768	832	0	-0.69713
MOS	0.91111	0.0404292	0.91066	0.999768	833	0	-0.092396
NLN	0.91138	0.0403005	0.91103	0.999768	834	0	-0.042205
B9D2	0.91166	0.0401671	0.9113	0.999768	835	0	-0.41368
TRPC1	0.91184	0.0400814	0.91145	0.999768	836	0	-0.45326
HLA-DQB1	0.91283	0.0396101	0.91233	0.999768	837	0	0.048039
MMP1	0.91301	0.0395245	0.91247	0.999768	838	0	0.53341
LIG3	0.9131	0.0394817	0.91263	0.999768	839	0	-0.82252
SLC13A3	0.91373	0.0391821	0.91326	0.999768	840	0	-0.4069
DRC1	0.91461	0.0387641	0.91404	0.999768	841	0	-0.55815
CEP85L	0.91487	0.0386406	0.91423	0.999768	842	0	0.14846
LIN37	0.91531	0.0384318	0.91459	0.999768	843	0	-0.22842
PRKAR1A	0.91549	0.0383464	0.91463	0.999768	844	0	-0.80365
DPF3	0.91566	0.0382658	0.9148	0.999768	845	0	-0.52306
CDH9	0.91575	0.0382231	0.91489	0.999768	846	0	0.08711
C2CD5	0.91618	0.0380192	0.91536	0.999768	847	0	0.15246
TMEM55B	0.91653	0.0378533	0.91571	0.999768	848	0	-0.6294
TSC2	0.9167	0.0377728	0.91587	0.999768	849	0	0.050942
C9orf41	0.91722	0.0375265	0.91647	0.999768	850	0	-0.43617
RAB5A	0.91816	0.0370816	0.91762	0.999768	851	0	0.32921
CTDSPL2	0.91917	0.0366042	0.91856	0.999768	852	0	-0.21772
PML	0.91934	0.0365238	0.91865	0.999768	853	0	-0.053307
HPS6	0.9195	0.0364483	0.91886	0.999768	854	0	-0.45769
CST6	0.91951	0.0364435	0.919	0.999768	855	0	-0.76527
C11orf49	0.91959	0.0364058	0.91892	0.999768	856	0	-0.12922
LBH	0.91967	0.036368	0.91905	0.999768	857	0	-0.006554
MFSD8	0.91984	0.0362877	0.91927	0.999768	858	0	-0.15911
APOA1BP	0.9205	0.0359762	0.91995	0.999768	859	0	-0.97921
AL590483.1	0.92083	0.0358205	0.92032	0.999768	860	0	0.21152
IL23A	0.92173	0.0353963	0.92106	0.999768	861	0	-1.0483
THSD7A	0.9219	0.0353162	0.92121	0.999768	862	0	-0.6921
DRG2	0.92351	0.0345584	0.92276	0.999768	863	0	-0.12104
AC011500.1	0.92375	0.0344455	0.923	0.999768	864	0	0.13228
ACSM1	0.92532	0.0337081	0.92473	0.999768	865	0	-0.24214
ZNF768	0.92702	0.0329109	0.92624	0.999768	866	0	-1.0116
CHRNA4	0.92748	0.0326954	0.9267	0.999768	867	0	-0.63479
GABRG2	0.92794	0.0324801	0.92731	0.999768	868	0	-0.8086
GOSR1	0.92801	0.0324473	0.92734	0.999768	869	0	-0.087724
ZNF812	0.92816	0.0323772	0.92753	0.999768	870	0	0.066182
PTCHD3	0.92906	0.0319562	0.92852	0.999768	871	0	-0.17367
SPIN1	0.92936	0.031816	0.92885	0.999768	872	0	-0.37338
ADH1B	0.93032	0.0313676	0.92983	0.999768	873	0	-0.15132
CCAR1	0.93113	0.0309897	0.93069	0.999768	874	0	-0.52201
FAM26F	0.93163	0.0307565	0.9312	0.999768	875	0	-0.18137
C5orf17	0.93192	0.0306214	0.9315	0.999768	876	0	-0.36493
CMIP	0.93285	0.0301882	0.9325	0.999768	877	0	-0.5541
SIRPA	0.93356	0.0298578	0.9333	0.999768	878	0	-0.37684
SLAMF9	0.93419	0.0295648	0.934	0.999768	879	0	0.21213
PRAMEF26	0.93502	0.0291791	0.93465	0.999768	880	0	-0.23858
PPP3R2	0.93577	0.0288309	0.93537	0.999768	881	0	-0.36906
APEX1	0.93746	0.0280473	0.93706	0.999768	882	0	-0.071432
ULK4	0.93752	0.0280195	0.93712	0.999768	883	0	0.27826
FNDC3A	0.93766	0.0279546	0.93727	0.999768	884	0	-0.17358
MYSM1	0.93994	0.0268999	0.93966	0.999768	885	0	-0.54654
NFATC2	0.9402	0.0267798	0.93999	0.999768	886	0	-0.090554
TMPRSS11F	0.94026	0.026752	0.94005	0.999768	887	0	0.02684
TNFRSF10B	0.94197	0.0259629	0.94166	0.999768	888	0	0.051208
KMT2C	0.94228	0.02582	0.94197	0.999768	889	0	0.15121
KCNC2	0.94271	0.0256219	0.94248	0.999768	890	0	-0.27042
AP5Z1	0.94289	0.025539	0.94268	0.999768	891	0	-1.3403
AC006449.1	0.94344	0.0252857	0.94323	0.999768	892	0	0.46771
MBTPS1	0.94399	0.0250326	0.94377	0.999768	893	0	-1.1015
TGM6	0.94441	0.0248394	0.94417	0.999768	894	0	-0.29641
OR52A5	0.94506	0.0245406	0.94479	0.999768	895	0	0.17991
ATP2B2	0.94518	0.0244855	0.94495	0.999768	896	0	-0.25273
CHST10	0.94601	0.0241043	0.94575	0.999768	897	0	-0.3298
LNPEP	0.94705	0.0236271	0.94671	0.999768	898	0	0.11055
BPNT1	0.94813	0.0231321	0.94775	0.999768	899	0	-0.23118
EMCN	0.94857	0.0229306	0.94812	0.999768	900	0	0.078079
PSME1	0.94968	0.0224227	0.9493	0.999768	901	0	-0.30476
NOS1	0.94984	0.0223495	0.94952	0.999768	902	0	-0.084025
GRM1	0.95125	0.0217053	0.95111	0.999768	903	0	-0.64964
BLMH	0.95209	0.021322	0.95188	0.999768	904	0	0.18971
PELI1	0.95274	0.0210256	0.95256	0.999768	905	0	-0.13549
WRN	0.95303	0.0208934	0.95284	0.999768	906	0	-0.23271
ADAM28	0.95328	0.0207795	0.95311	0.999768	907	0	0.3636
RCBTB1	0.95339	0.0207294	0.95324	0.999768	908	0	-0.078624
GZMA	0.95384	0.0205245	0.95365	0.999768	909	0	-0.85067
ZNF530	0.954	0.0204516	0.95375	0.999768	910	0	-0.50835
CABYR	0.9548	0.0200876	0.95466	0.999768	911	0	0.14174
CALHM1	0.95505	0.0199739	0.95488	0.999768	912	0	0.088821
REXO4	0.95632	0.0193968	0.95607	0.999768	913	0	0.20615
BZW2	0.95717	0.0190109	0.95661	0.999768	914	0	0.085058
DOC2B	0.95727	0.0189656	0.95712	0.999768	915	0	0.11298
ZFYVE26	0.95765	0.0187932	0.95764	0.999768	916	0	-0.41293
ITPKA	0.95802	0.0186254	0.95808	0.999768	917	0	0.20362
SPTAN1	0.95811	0.0185846	0.95825	0.999768	918	0	-0.18173
CELSR2	0.95825	0.0185212	0.95843	0.999768	919	0	-0.33307
IGSF5	0.96011	0.017679	0.96026	0.999768	920	0	-0.31992
BAZ1A	0.9602	0.0176383	0.96036	0.999768	921	0	-0.78681
CXorf24	0.96047	0.0175162	0.96067	0.999768	922	0	-0.37733
MAST3	0.96077	0.0173806	0.96097	0.999768	923	0	-1.7531
ZNF136	0.96112	0.0172224	0.96127	0.999768	924	0	0.061457
IZUMO4	0.96274	0.016491	0.96276	0.999768	925	0	0.31281
PIBF1	0.96299	0.0163782	0.96305	0.999768	926	0	-0.028563
SNN	0.96324	0.0162655	0.96321	0.999768	927	0	-0.67144
RNASE3	0.96353	0.0161348	0.96351	0.999768	928	0	-0.0081799
GNRH1	0.96365	0.0160807	0.96367	0.999768	929	0	-0.039923
SNTB1	0.96442	0.0157338	0.96443	0.999768	930	0	-0.39162
ZNF281	0.96482	0.0155537	0.96491	0.999768	931	0	-0.23075
AC019294.1	0.96799	0.0141291	0.96784	0.999768	932	0	0.11121
CLVS2	0.96805	0.0141022	0.96825	0.999768	933	0	0.1408
MTMR1	0.96812	0.0140708	0.96829	0.999768	934	0	0.14856
OR2G3	0.96881	0.0137614	0.96896	0.999768	935	0	-0.20161
SERINC3	0.96895	0.0136986	0.96907	0.999768	936	0	0.1966
ASPN	0.97006	0.0132014	0.9701	0.999768	937	0	-0.056244
HSPG2	0.97027	0.0131074	0.97026	0.999768	938	0	-0.59539
PSMG4	0.97051	0.013	0.97053	0.999768	939	0	-0.046633
PIPOX	0.97084	0.0128523	0.97078	0.999768	940	0	-0.39141
BCKDK	0.97114	0.0127182	0.97111	0.999768	941	0	-0.95355
CUZD1	0.97121	0.0126869	0.97118	0.999768	942	0	-0.49399
DPM3	0.97141	0.0125974	0.97138	0.999768	943	0	-0.35554
AP1G2	0.97196	0.0123516	0.97198	0.999768	944	0	-1.0187
SCUBE1	0.97206	0.0123069	0.97214	0.999768	945	0	-0.3871
LSG1	0.97219	0.0122489	0.9723	0.999768	946	0	-0.56028
PNMA5	0.97225	0.012222	0.97234	0.999768	947	0	-0.10474
GJA8	0.97342	0.0116997	0.97354	0.999768	948	0	-0.74719
UBE2T	0.97451	0.0112137	0.97457	0.999768	949	0	-0.8293
ACSM4	0.97457	0.011187	0.97459	0.999768	950	0	-0.31783
OR52H1	0.97465	0.0111513	0.9747	0.999768	951	0	-0.25064
BMP3	0.97492	0.011031	0.97497	0.999768	952	0	-0.085542
APOBR	0.97592	0.0105858	0.97594	0.999768	953	0	-0.56653
WARS	0.97621	0.0104567	0.97592	0.999768	954	0	-1.2609
ZNF470	0.97654	0.01031	0.97657	0.999768	955	0	-0.16893
FAN1	0.97824	0.00955458	0.97836	0.999768	956	0	0.071932
TAAR1	0.97873	0.0093371	0.97884	0.999768	957	0	-0.27534
MOK	0.97979	0.008867	0.97979	0.999768	958	0	-0.4683
LOXL2	0.98059	0.00851254	0.98059	0.999768	959	0	-0.49096
ACAA1	0.98075	0.00844168	0.98076	0.999768	960	0	-0.23384
E2F7	0.98089	0.00837969	0.98093	0.999768	961	0	-1.2255
FZD6	0.98135	0.00817607	0.98136	0.999768	962	0	-0.20872
FBXO18	0.98139	0.00815837	0.9814	0.999768	963	0	-0.1762
MORC2	0.98166	0.0080389	0.98172	0.999768	964	0	-1.3083
C17orf107	0.98168	0.00803006	0.98175	0.999768	965	0	-0.32254
NINJ2	0.98201	0.00788409	0.98213	0.999768	966	0	-0.46948
C9orf163	0.98308	0.00741114	0.98322	0.999768	967	0	-0.7614
STARD13	0.98319	0.00736255	0.98325	0.999768	968	0	-0.065646
FZD3	0.98381	0.00708877	0.98397	0.999768	969	0	0.2725
FBXL7	0.98443	0.00681516	0.98454	0.999768	970	0	-0.51907
TMEM52	0.98447	0.00679751	0.98457	0.999768	971	0	-0.36848
RBBP8NL	0.98512	0.00651086	0.98525	0.999768	972	0	-1.0199
TRAF2	0.98708	0.00564765	0.98713	0.999768	973	0	-0.43229
CTXN2	0.98758	0.00542771	0.9872	0.999768	974	0	-0.090317
C5orf63	0.98833	0.00509802	0.98795	0.999768	975	0	-0.35134
MYBBP1A	0.98853	0.00501015	0.98854	0.999768	976	0	-0.89336
FGF20	0.98956	0.00455787	0.98955	0.999768	977	0	-0.40251
TMEM45B	0.99045	0.00416744	0.99032	0.999768	978	0	-0.2445
MAP7	0.99091	0.00396579	0.99087	0.999768	979	0	-0.3521
TP53I3	0.99111	0.00387814	0.99107	0.999768	980	0	-0.28915
PALLD	0.99149	0.00371166	0.99141	0.999768	981	0	-0.48722
DGCR8	0.99169	0.00362407	0.9916	0.999768	982	0	-2.3203
RBM18	0.99232	0.00334826	0.99228	0.999768	983	0	-0.23179
LYST	0.99277	0.00315136	0.99278	0.999768	984	0	-0.45743
ACCS	0.99383	0.0026879	0.9939	0.999768	985	0	-0.60755
AP001631.10	0.99405	0.00259177	0.9941	0.999768	986	0	-0.38923
MAGI3	0.99424	0.00250877	0.99422	0.999768	987	0	-0.50147
ABCA6	0.99534	0.00202854	0.99527	0.999768	988	0	0.021459
EPOR	0.99568	0.00188022	0.99574	0.999768	989	0	-0.55638
IGLJ5	0.99593	0.00177119	0.99587	0.999768	990	0	-0.91723
WDPCP	0.99596	0.0017581	0.996	0.999768	991	0	-0.29512
OR1A2	0.99611	0.0016927	0.99614	0.999768	992	0	0.0031053
CSE1L	0.99749	0.00109145	0.99744	0.999768	993	0	-2.3919
NKX6-3	0.9976	0.00104356	0.99765	0.999768	994	0	-0.67583
TRIP11	0.99793	0.000899921	0.99792	0.999768	995	0	-0.53722
HIST1H2BD	0.99827	0.00075198	0.99824	0.999768	996	0	-0.67037
RUNX2	0.99879	0.000525815	0.99885	0.999768	997	0	-0.24544
EVL	0.99918	0.000356268	0.99929	0.999768	998	0	-0.68576
ANKH	0.99933	0.000291075	0.9994	0.999768	999	0	-0.55121
CCDC183	0.99965	0.00015203	0.99969	0.999768	1000	0	-0.77304
TFRC	0.99973	0.000117275	0.99977	0.999768	1001	0	-2.9329

## Sheet: sgRNA counts genome-wide
Gene ID	sgRNA	Library counts	Sort counts
A1BG	ENSG00000121410_195964.1	276	0
A1BG	ENSG00000121410_195965.2	485	0
A1BG	ENSG00000121410_195966.3	162	0
A1BG	ENSG00000121410_195967.4	404	0
A1BG	ENSG00000121410_195968.5	338	0
A1BG	ENSG00000121410_195969.6	432	0
A1BG	ENSG00000121410_195970.7	491	0
A1BG	ENSG00000121410_195971.8	168	0
A1BG	ENSG00000121410_195972.9	131	0
A1BG	ENSG00000121410_195973.10	457	0
A1CF	ENSG00000148584_83076.1	565	0
A1CF	ENSG00000148584_83077.2	1309	0
A1CF	ENSG00000148584_83078.3	356	0
A1CF	ENSG00000148584_83079.4	137	0
A1CF	ENSG00000148584_83080.5	268	0
A1CF	ENSG00000148584_83081.6	182	0
A1CF	ENSG00000148584_83082.7	62	0
A1CF	ENSG00000148584_83083.8	167	0
A1CF	ENSG00000148584_83084.9	104	0
A1CF	ENSG00000148584_83085.10	237	0
A2M	ENSG00000175899_95102.1	113	0
A2M	ENSG00000175899_95103.2	651	0
A2M	ENSG00000175899_95104.3	697	0
A2M	ENSG00000175899_95105.4	339	0
A2M	ENSG00000175899_95106.5	596	0
A2M	ENSG00000175899_95107.6	886	0
A2M	ENSG00000175899_95108.7	450	0
A2M	ENSG00000175899_95109.8	836	0
A2M	ENSG00000175899_95110.9	233	0
A2M	ENSG00000175899_95111.10	974	0
A2ML1	ENSG00000166535_125882.1	357	0
A2ML1	ENSG00000166535_125883.2	378	0
A2ML1	ENSG00000166535_125884.3	964	0
A2ML1	ENSG00000166535_125885.4	419	0
A2ML1	ENSG00000166535_125886.5	669	0
A2ML1	ENSG00000166535_125887.6	197	0
A2ML1	ENSG00000166535_125888.7	418	0
A2ML1	ENSG00000166535_125889.8	1028	0
A2ML1	ENSG00000166535_125890.9	444	0
A2ML1	ENSG00000166535_125891.10	1447	0
A3GALT2	ENSG00000184389_203181.1	950	0
A3GALT2	ENSG00000184389_203182.2	449	0
A3GALT2	ENSG00000184389_203183.3	303	0
A3GALT2	ENSG00000184389_203184.4	197	0
A3GALT2	ENSG00000184389_203185.5	2552	0
A3GALT2	ENSG00000184389_203186.6	457	0
A3GALT2	ENSG00000184389_203187.7	982	0
A3GALT2	ENSG00000184389_203188.8	19	0
A3GALT2	ENSG00000184389_203189.9	274	0
A3GALT2	ENSG00000184389_203190.10	190	0
A4GALT	ENSG00000128274_74441.1	416	0
A4GALT	ENSG00000128274_74442.2	311	0
A4GALT	ENSG00000128274_74443.3	225	0
A4GALT	ENSG00000128274_74444.4	878	0
A4GALT	ENSG00000128274_74445.5	528	0
A4GALT	ENSG00000128274_74446.6	551	0
A4GALT	ENSG00000128274_74447.7	417	0
A4GALT	ENSG00000128274_74448.8	203	0
A4GALT	ENSG00000128274_74449.9	464	0
A4GALT	ENSG00000128274_74450.10	671	0
A4GNT	ENSG00000118017_19195.1	335	0
A4GNT	ENSG00000118017_19196.2	244	0
A4GNT	ENSG00000118017_19197.3	438	0
A4GNT	ENSG00000118017_19198.4	36	0
A4GNT	ENSG00000118017_19199.5	261	0
A4GNT	ENSG00000118017_19200.6	863	0
A4GNT	ENSG00000118017_19201.7	531	0
A4GNT	ENSG00000118017_19202.8	517	0
A4GNT	ENSG00000118017_19203.9	452	0
A4GNT	ENSG00000118017_19204.10	691	0
AAAS	ENSG00000094914_165031.1	427	0
AAAS	ENSG00000094914_165032.2	839	0
AAAS	ENSG00000094914_165033.3	260	0
AAAS	ENSG00000094914_165034.4	488	0
AAAS	ENSG00000094914_165035.5	378	0
AAAS	ENSG00000094914_165036.6	542	0
AAAS	ENSG00000094914_165037.7	281	0
AAAS	ENSG00000094914_165038.8	229	0
AAAS	ENSG00000094914_165039.9	539	0
AAAS	ENSG00000094914_165040.10	479	0
AACS	ENSG00000081760_131442.1	438	0
AACS	ENSG00000081760_131443.2	455	0
AACS	ENSG00000081760_131444.3	855	0
AACS	ENSG00000081760_131445.4	262	0
AACS	ENSG00000081760_131446.5	287	0
AACS	ENSG00000081760_131447.6	230	46
AACS	ENSG00000081760_131448.7	504	0
AACS	ENSG00000081760_131449.8	201	15
AACS	ENSG00000081760_131450.9	444	0
AACS	ENSG00000081760_131451.10	168	0
AADAC	ENSG00000114771_39805.1	159	0
AADAC	ENSG00000114771_39806.2	148	0
AADAC	ENSG00000114771_39807.3	350	0
AADAC	ENSG00000114771_39808.4	223	0
AADAC	ENSG00000114771_39809.5	133	0
AADAC	ENSG00000114771_39810.6	708	0
AADAC	ENSG00000114771_39811.7	890	0
AADAC	ENSG00000114771_39812.8	304	0
AADAC	ENSG00000114771_39813.9	113	0
AADAC	ENSG00000114771_39814.10	226	0
AADACL2	ENSG00000197953_2826.1	180	0
AADACL2	ENSG00000197953_2827.2	573	0
AADACL2	ENSG00000197953_2828.3	346	0
AADACL2	ENSG00000197953_2829.4	443	0
AADACL2	ENSG00000197953_2830.5	450	0
AADACL2	ENSG00000197953_2831.6	412	0
AADACL2	ENSG00000197953_2832.7	230	0
AADACL2	ENSG00000197953_2833.8	286	0
AADACL2	ENSG00000197953_2834.9	500	0
AADACL2	ENSG00000197953_2835.10	588	0
AADACL3	ENSG00000188984_199136.1	619	0
AADACL3	ENSG00000188984_199137.2	417	0
AADACL3	ENSG00000188984_199138.3	236	0
AADACL3	ENSG00000188984_199139.4	574	0
AADACL3	ENSG00000188984_199140.5	116	0
AADACL3	ENSG00000188984_199141.6	368	0
AADACL3	ENSG00000188984_199142.7	1200	38
AADACL3	ENSG00000188984_199143.8	169	0
AADACL3	ENSG00000188984_199144.9	841	0
AADACL3	ENSG00000188984_199145.10	66	0
AADACL4	ENSG00000204518_55865.1	645	0
AADACL4	ENSG00000204518_55866.2	589	34
AADACL4	ENSG00000204518_55867.3	190	0
AADACL4	ENSG00000204518_55868.4	1494	0
AADACL4	ENSG00000204518_55869.5	92	0
AADACL4	ENSG00000204518_55870.6	402	0
AADACL4	ENSG00000204518_55871.7	148	0
AADACL4	ENSG00000204518_55872.8	118	78
AADACL4	ENSG00000204518_55873.9	146	0
AADACL4	ENSG00000204518_55874.10	525	0
AADAT	ENSG00000109576_137596.1	907	0
AADAT	ENSG00000109576_137597.2	439	0
AADAT	ENSG00000109576_137598.3	403	0
AADAT	ENSG00000109576_137599.4	319	0
AADAT	ENSG00000109576_137600.5	206	0
AADAT	ENSG00000109576_137601.6	111	0
AADAT	ENSG00000109576_137602.7	228	0
AADAT	ENSG00000109576_137603.8	252	0
AADAT	ENSG00000109576_137604.9	127	0
AADAT	ENSG00000109576_137605.10	375	0
AAED1	ENSG00000158122_153443.1	1248	0
AAED1	ENSG00000158122_153444.2	1038	4
AAED1	ENSG00000158122_153445.3	741	0
AAED1	ENSG00000158122_153446.4	1277	11
AAED1	ENSG00000158122_153447.5	76	0
AAED1	ENSG00000158122_153448.6	202	0
AAED1	ENSG00000158122_153449.7	15	0
AAED1	ENSG00000158122_153450.8	109	0
AAED1	ENSG00000158122_153451.9	352	0
AAED1	ENSG00000158122_153452.10	176	0
AAGAB	ENSG00000103591_185243.1	434	529
AAGAB	ENSG00000103591_185244.2	0	0
AAGAB	ENSG00000103591_185245.3	168	1171
AAGAB	ENSG00000103591_185246.4	85	141
AAGAB	ENSG00000103591_185247.5	199	551
AAGAB	ENSG00000103591_185248.6	472	0
AAGAB	ENSG00000103591_185249.7	85	2102
AAGAB	ENSG00000103591_185250.8	552	174
AAGAB	ENSG00000103591_185251.9.V	609	2477
AAGAB	ENSG00000103591_185252.10.V	356	375
AAK1	ENSG00000115977_82836.1	483	71
AAK1	ENSG00000115977_82837.2	325	0
AAK1	ENSG00000115977_82838.3	57	0
AAK1	ENSG00000115977_82839.4	876	0
AAK1	ENSG00000115977_82840.5	141	0
AAK1	ENSG00000115977_82841.6	340	0
AAK1	ENSG00000115977_82842.7	339	6
AAK1	ENSG00000115977_82843.8	84	0
AAK1	ENSG00000115977_82844.9	369	0
AAK1	ENSG00000115977_82845.10	97	0
AAMDC	ENSG00000087884_116030.1	333	0
AAMDC	ENSG00000087884_116031.2	377	0
AAMDC	ENSG00000087884_116032.3	764	0
AAMDC	ENSG00000087884_116033.4	319	0
AAMDC	ENSG00000087884_116034.5	368	0
AAMDC	ENSG00000087884_116035.6	986	0
AAMDC	ENSG00000087884_116036.7	634	0
AAMDC	ENSG00000087884_116037.8	205	0
AAMDC	ENSG00000087884_116038.9	298	0
AAMDC	ENSG00000087884_116039.10	272	0
AAMP	ENSG00000127837_101337.1	253	0
AAMP	ENSG00000127837_101338.2	80	0
AAMP	ENSG00000127837_101339.3	3	0
AAMP	ENSG00000127837_101340.4	493	0
AAMP	ENSG00000127837_101341.5	158	0
AAMP	ENSG00000127837_101342.6	80	0
AAMP	ENSG00000127837_101343.7	350	0
AAMP	ENSG00000127837_101344.8	113	0
AAMP	ENSG00000127837_101345.9	311	0
AAMP	ENSG00000127837_101346.10	86	0
AANAT	ENSG00000129673_87321.1	728	0
AANAT	ENSG00000129673_87322.2	135	0
AANAT	ENSG00000129673_87323.3	309	0
AANAT	ENSG00000129673_87324.4	302	0
AANAT	ENSG00000129673_87325.5	468	53
AANAT	ENSG00000129673_87326.6	152	21
AANAT	ENSG00000129673_87327.7	132	0
AANAT	ENSG00000129673_87328.8	180	0
AANAT	ENSG00000129673_87329.9	449	0
AANAT	ENSG00000129673_87330.10	34	0
AAR2	ENSG00000131043_21146.1	369	0
AAR2	ENSG00000131043_21147.2	1059	94
AAR2	ENSG00000131043_21148.3	290	0
AAR2	ENSG00000131043_21149.4	523	0
AAR2	ENSG00000131043_21150.5	576	0
AAR2	ENSG00000131043_21151.6	657	0
AAR2	ENSG00000131043_21152.7	135	0
AAR2	ENSG00000131043_21153.8	102	0
AAR2	ENSG00000131043_21154.9	283	0
AAR2	ENSG00000131043_21155.10	247	0
AARD	ENSG00000205002_75669.1	298	0
AARD	ENSG00000205002_75670.2	304	0
AARD	ENSG00000205002_75671.3	1049	0
AARD	ENSG00000205002_75672.4	723	0
AARD	ENSG00000205002_75673.5	245	0
AARD	ENSG00000205002_75674.6	420	0
AARD	ENSG00000205002_75675.7	495	29
AARD	ENSG00000205002_75676.8	1358	0
AARD	ENSG00000205002_75677.9	347	0
AARD	ENSG00000205002_75678.10	152	0
AARS	ENSG00000090861_65312.1	183	0
AARS	ENSG00000090861_65313.2	564	0
AARS	ENSG00000090861_65314.3	340	0
AARS	ENSG00000090861_65315.4	87	0
AARS	ENSG00000090861_65316.5	706	0
AARS	ENSG00000090861_65317.6	193	0
AARS	ENSG00000090861_65318.7	327	0
AARS	ENSG00000090861_65319.8	197	0
AARS	ENSG00000090861_65320.9	83	0
AARS	ENSG00000090861_65321.10	172	0
AARS2	ENSG00000124608_27945.1	913	0
AARS2	ENSG00000124608_27946.2	433	0
AARS2	ENSG00000124608_27947.3	215	0
AARS2	ENSG00000124608_27948.4	299	0
AARS2	ENSG00000124608_27949.5	216	0
AARS2	ENSG00000124608_27950.6	244	0
AARS2	ENSG00000124608_27951.7	519	0
AARS2	ENSG00000124608_27952.8	606	0
AARS2	ENSG00000124608_27953.9	404	0
AARS2	ENSG00000124608_27954.10	338	0
AARSD1	ENSG00000266967_15974.1	311	0
AARSD1	ENSG00000266967_15975.2	156	0
AARSD1	ENSG00000266967_15976.3	114	0
AARSD1	ENSG00000266967_15977.4	467	0
AARSD1	ENSG00000266967_15978.5	464	0
AARSD1	ENSG00000266967_15979.6	603	0
AARSD1	ENSG00000266967_15980.7	456	0
AARSD1	ENSG00000266967_15981.8	221	0
AARSD1	ENSG00000266967_15982.9	315	0
AARSD1	ENSG00000266967_15983.10	125	0
AASDH	ENSG00000157426_145018.1	416	0
AASDH	ENSG00000157426_145019.2	235	0
AASDH	ENSG00000157426_145020.3	388	0
AASDH	ENSG00000157426_145021.4	578	0
AASDH	ENSG00000157426_145022.5	182	0
AASDH	ENSG00000157426_145023.6	778	0
AASDH	ENSG00000157426_145024.7	423	0
AASDH	ENSG00000157426_145025.8	408	41
AASDH	ENSG00000157426_145026.9	168	0
AASDH	ENSG00000157426_145027.10	808	0
AASDHPPT	ENSG00000149313_149485.1	186	0
AASDHPPT	ENSG00000149313_149486.2	108	0
AASDHPPT	ENSG00000149313_149487.3	57	0
AASDHPPT	ENSG00000149313_149488.4	682	0
AASDHPPT	ENSG00000149313_149489.5	96	0
AASDHPPT	ENSG00000149313_149490.6	495	0
AASDHPPT	ENSG00000149313_149491.7	220	0
AASDHPPT	ENSG00000149313_149492.8	360	0
AASDHPPT	ENSG00000149313_149493.9	419	0
AASDHPPT	ENSG00000149313_149494.10	240	0
AASS	ENSG00000008311_79150.1	470	0
AASS	ENSG00000008311_79151.2	810	46
AASS	ENSG00000008311_79152.3	29	0
AASS	ENSG00000008311_79153.4	498	0
AASS	ENSG00000008311_79154.5	265	28
AASS	ENSG00000008311_79155.6	389	0
AASS	ENSG00000008311_79156.7	456	0
AASS	ENSG00000008311_79157.8	224	0
AASS	ENSG00000008311_79158.9	449	36
AASS	ENSG00000008311_79159.10	471	0
AATF	ENSG00000108270_54858.1	1114	0
AATF	ENSG00000108270_54859.2	179	0
AATF	ENSG00000108270_54860.3	240	0
AATF	ENSG00000108270_54861.4	238	0
AATF	ENSG00000108270_54862.5	251	0
AATF	ENSG00000108270_54863.6	603	0
AATF	ENSG00000108270_54864.7	89	0
AATF	ENSG00000108270_54865.8	150	0
AATF	ENSG00000108270_54866.9	237	0
AATF	ENSG00000108270_54867.10	501	0
AATK	ENSG00000181409_159784.1	0	0
AATK	ENSG00000181409_159785.2	134	10
AATK	ENSG00000181409_159786.3	492	0
AATK	ENSG00000181409_159787.4	223	0
AATK	ENSG00000181409_159788.5	297	0
AATK	ENSG00000181409_159789.6	48	0
AATK	ENSG00000181409_159790.7	853	0
AATK	ENSG00000181409_159791.8	235	202
AATK	ENSG00000181409_159792.9	743	0
AATK	ENSG00000181409_159793.10	661	0
ABAT	ENSG00000183044_103937.1	998	0
ABAT	ENSG00000183044_103938.2	1517	0
ABAT	ENSG00000183044_103939.3	928	0
ABAT	ENSG00000183044_103940.4	223	0
ABAT	ENSG00000183044_103941.5	458	0
ABAT	ENSG00000183044_103942.6	109	0
ABAT	ENSG00000183044_103943.7	350	0
ABAT	ENSG00000183044_103944.8	498	0
ABAT	ENSG00000183044_103945.9	733	0
ABAT	ENSG00000183044_103946.10	176	0
ABCA1	ENSG00000165029_148855.1	130	0
ABCA1	ENSG00000165029_148856.2	34	0
ABCA1	ENSG00000165029_148857.3	644	0
ABCA1	ENSG00000165029_148858.4	436	49
ABCA1	ENSG00000165029_148859.5	73	0
ABCA1	ENSG00000165029_148860.6	591	777
ABCA1	ENSG00000165029_148861.7	381	0
ABCA1	ENSG00000165029_148862.8	411	0
ABCA1	ENSG00000165029_148863.9	490	0
ABCA1	ENSG00000165029_148864.10	1200	0
ABCA10	ENSG00000154263_30017.1	65	0
ABCA10	ENSG00000154263_30018.2	316	0
ABCA10	ENSG00000154263_30019.3	907	0
ABCA10	ENSG00000154263_30020.4	143	0
ABCA10	ENSG00000154263_30021.5	559	0
ABCA10	ENSG00000154263_30022.6	286	0
ABCA10	ENSG00000154263_30023.7	367	0
ABCA10	ENSG00000154263_30024.8	1366	0
ABCA10	ENSG00000154263_30025.9	372	0
ABCA10	ENSG00000154263_30026.10	317	0
ABCA12	ENSG00000144452_202039.1	305	0
ABCA12	ENSG00000144452_202040.2	134	0
ABCA12	ENSG00000144452_202041.3	173	0
ABCA12	ENSG00000144452_202042.4	458	0
ABCA12	ENSG00000144452_202043.5	82	0
ABCA12	ENSG00000144452_202044.6	397	0
ABCA12	ENSG00000144452_202045.7	594	0
ABCA12	ENSG00000144452_202046.8	166	0
ABCA12	ENSG00000144452_202047.9	437	0
ABCA12	ENSG00000144452_202048.10	119	0
ABCA13	ENSG00000179869_8670.1	466	0
ABCA13	ENSG00000179869_8671.2	340	0
ABCA13	ENSG00000179869_8672.3	510	0
ABCA13	ENSG00000179869_8673.4	341	0
ABCA13	ENSG00000179869_8674.5	588	0
ABCA13	ENSG00000179869_8675.6	72	0
ABCA13	ENSG00000179869_8676.7	638	0
ABCA13	ENSG00000179869_8677.8	529	0
ABCA13	ENSG00000179869_8678.9	105	0
ABCA13	ENSG00000179869_8679.10	348	0
ABCA2	ENSG00000107331_143542.1	335	0
ABCA2	ENSG00000107331_143543.2	658	0
ABCA2	ENSG00000107331_143544.3	83	0
ABCA2	ENSG00000107331_143545.4	473	0
ABCA2	ENSG00000107331_143546.5	177	0
ABCA2	ENSG00000107331_143547.6	560	0
ABCA2	ENSG00000107331_143548.7	578	0
ABCA2	ENSG00000107331_143549.8	263	0
ABCA2	ENSG00000107331_143550.9	128	0
ABCA2	ENSG00000107331_143551.10	461	0
ABCA3	ENSG00000167972_90075.1	256	0
ABCA3	ENSG00000167972_90076.2	223	0
ABCA3	ENSG00000167972_90077.3	937	0
ABCA3	ENSG00000167972_90078.4	166	0
ABCA3	ENSG00000167972_90079.5	166	0
ABCA3	ENSG00000167972_90080.6	178	0
ABCA3	ENSG00000167972_90081.7	404	37
ABCA3	ENSG00000167972_90082.8	352	82
ABCA3	ENSG00000167972_90083.9	299	32
ABCA3	ENSG00000167972_90084.10	382	0
ABCA4	ENSG00000198691_56736.1	520	0
ABCA4	ENSG00000198691_56737.2	439	0
ABCA4	ENSG00000198691_56738.3	300	0
ABCA4	ENSG00000198691_56739.4	757	0
ABCA4	ENSG00000198691_56740.5	235	0
ABCA4	ENSG00000198691_56741.6	655	0
ABCA4	ENSG00000198691_56742.7	513	0
ABCA4	ENSG00000198691_56743.8	477	0
ABCA4	ENSG00000198691_56744.9	727	0
ABCA4	ENSG00000198691_56745.10	240	0
ABCA5	ENSG00000154265_187405.1	194	0
ABCA5	ENSG00000154265_187406.2	450	9
ABCA5	ENSG00000154265_187407.3	495	0
ABCA5	ENSG00000154265_187408.4	197	0
ABCA5	ENSG00000154265_187409.5	597	0
ABCA5	ENSG00000154265_187410.6	263	0
ABCA5	ENSG00000154265_187411.7	211	0
ABCA5	ENSG00000154265_187412.8	742	0
ABCA5	ENSG00000154265_187413.9	229	0
ABCA5	ENSG00000154265_187414.10	590	0
ABCA6	ENSG00000154262_30007.1	520	0
ABCA6	ENSG00000154262_30008.2	397	1
ABCA6	ENSG00000154262_30009.3	339	0
ABCA6	ENSG00000154262_30010.4	26	0
ABCA6	ENSG00000154262_30011.5	306	0
ABCA6	ENSG00000154262_30012.6	401	0
ABCA6	ENSG00000154262_30013.7	243	0
ABCA6	ENSG00000154262_30014.8	799	120
ABCA6	ENSG00000154262_30015.9	587	65
ABCA6	ENSG00000154262_30016.10	334	0
ABCA7	ENSG00000064687_17370.1	154	0
ABCA7	ENSG00000064687_17371.2	126	0
ABCA7	ENSG00000064687_17372.3	325	0
ABCA7	ENSG00000064687_17373.4	520	0
ABCA7	ENSG00000064687_17374.5	950	0
ABCA7	ENSG00000064687_17375.6	177	0
ABCA7	ENSG00000064687_17376.7	204	0
ABCA7	ENSG00000064687_17377.8	370	57
ABCA7	ENSG00000064687_17378.9	215	0
ABCA7	ENSG00000064687_17379.10	484	0
ABCA8	ENSG00000141338_109081.1	376	117
ABCA8	ENSG00000141338_109082.2	541	0
ABCA8	ENSG00000141338_109083.3	274	0
ABCA8	ENSG00000141338_109084.4	842	0
ABCA8	ENSG00000141338_109085.5	293	0
ABCA8	ENSG00000141338_109086.6	626	0
ABCA8	ENSG00000141338_109087.7	566	0
ABCA8	ENSG00000141338_109088.8	268	0
ABCA8	ENSG00000141338_109089.9	328	0
ABCA8	ENSG00000141338_109090.10	49	0
ABCA9	ENSG00000154258_134363.1	428	0
ABCA9	ENSG00000154258_134364.2	272	0
ABCA9	ENSG00000154258_134365.3	336	0
ABCA9	ENSG00000154258_134366.4	376	0
ABCA9	ENSG00000154258_134367.5	262	0
ABCA9	ENSG00000154258_134368.6	422	0
ABCA9	ENSG00000154258_134369.7	522	0
ABCA9	ENSG00000154258_134370.8	639	0
ABCA9	ENSG00000154258_134371.9	755	0
ABCA9	ENSG00000154258_134372.10	85	0
ABCB1	ENSG00000085563_20036.1	120	0
ABCB1	ENSG00000085563_20037.2	494	0
ABCB1	ENSG00000085563_20038.3	654	0
ABCB1	ENSG00000085563_20039.4	454	0
ABCB1	ENSG00000085563_20040.5	689	0
ABCB1	ENSG00000085563_20041.6	559	0
ABCB1	ENSG00000085563_20042.7	562	0
ABCB1	ENSG00000085563_20043.8	721	0
ABCB1	ENSG00000085563_20044.9	694	0
ABCB1	ENSG00000085563_20045.10	443	0
ABCB10	ENSG00000135776_18420.1	344	0
ABCB10	ENSG00000135776_18421.2	108	0
ABCB10	ENSG00000135776_18422.3	157	0
ABCB10	ENSG00000135776_18423.4	533	0
ABCB10	ENSG00000135776_18424.5	177	0
ABCB10	ENSG00000135776_18425.6	329	0
ABCB10	ENSG00000135776_18426.7	476	0
ABCB10	ENSG00000135776_18427.8	841	0
ABCB10	ENSG00000135776_18428.9	210	0
ABCB10	ENSG00000135776_18429.10	446	0
ABCB11	ENSG00000073734_154366.1	394	0
ABCB11	ENSG00000073734_154367.2	399	0
ABCB11	ENSG00000073734_154368.3	584	0
ABCB11	ENSG00000073734_154369.4	442	0
ABCB11	ENSG00000073734_154370.5	309	0
ABCB11	ENSG00000073734_154371.6	491	0
ABCB11	ENSG00000073734_154372.7	297	0
ABCB11	ENSG00000073734_154373.8	242	0
ABCB11	ENSG00000073734_154374.9	63	0
ABCB11	ENSG00000073734_154375.10	471	0
ABCB4	ENSG00000005471_13335.1	69	0
ABCB4	ENSG00000005471_13336.2	242	0
ABCB4	ENSG00000005471_13337.3	418	0
ABCB4	ENSG00000005471_13338.4	178	0
ABCB4	ENSG00000005471_13339.5	407	3
ABCB4	ENSG00000005471_13340.6	402	0
ABCB4	ENSG00000005471_13341.7	281	0
ABCB4	ENSG00000005471_13342.8	257	0
ABCB4	ENSG00000005471_13343.9	436	0
ABCB4	ENSG00000005471_13344.10	40	30
ABCB5	ENSG00000004846_183987.1	173	0
ABCB5	ENSG00000004846_183988.2	1560	0
ABCB5	ENSG00000004846_183989.3	558	0
ABCB5	ENSG00000004846_183990.4	124	0
ABCB5	ENSG00000004846_183991.5	830	0
ABCB5	ENSG00000004846_183992.6	147	0
ABCB5	ENSG00000004846_183993.7	186	0
ABCB5	ENSG00000004846_183994.8	92	0
ABCB5	ENSG00000004846_183995.9	873	0
ABCB5	ENSG00000004846_183996.10	623	0
ABCB6	ENSG00000115657_95082.1	504	0
ABCB6	ENSG00000115657_95083.2	0	0
ABCB6	ENSG00000115657_95084.3	137	41
ABCB6	ENSG00000115657_95085.4	933	0
ABCB6	ENSG00000115657_95086.5	159	0
ABCB6	ENSG00000115657_95087.6	256	0
ABCB6	ENSG00000115657_95088.7	529	0
ABCB6	ENSG00000115657_95089.8	477	0
ABCB6	ENSG00000115657_95090.9	78	0
ABCB6	ENSG00000115657_95091.10	182	0
ABCB7	ENSG00000131269_178745.1	462	0
ABCB7	ENSG00000131269_178746.2	26	0
ABCB7	ENSG00000131269_178747.3	109	0
ABCB7	ENSG00000131269_178748.4	284	0
ABCB7	ENSG00000131269_178749.5	334	0
ABCB7	ENSG00000131269_178750.6	262	0
ABCB7	ENSG00000131269_178751.7	435	0
ABCB7	ENSG00000131269_178752.8	581	0
ABCB7	ENSG00000131269_178753.9	96	0
ABCB7	ENSG00000131269_178754.10	248	0
ABCB8	ENSG00000197150_124544.1	474	0
ABCB8	ENSG00000197150_124545.2	252	0
ABCB8	ENSG00000197150_124546.3	663	0
ABCB8	ENSG00000197150_124547.4	415	0
ABCB8	ENSG00000197150_124548.5	323	0
ABCB8	ENSG00000197150_124549.6	281	0
ABCB8	ENSG00000197150_124550.7	232	66
ABCB8	ENSG00000197150_124551.8	423	0
ABCB8	ENSG00000197150_124552.9	560	36
ABCB8	ENSG00000197150_124553.10	311	0
ABCB9	ENSG00000150967_74551.1	807	0
ABCB9	ENSG00000150967_74552.2	235	0
ABCB9	ENSG00000150967_74553.3	552	0
ABCB9	ENSG00000150967_74554.4	358	0
ABCB9	ENSG00000150967_74555.5	77	0
ABCB9	ENSG00000150967_74556.6	523	0
ABCB9	ENSG00000150967_74557.7	443	0
ABCB9	ENSG00000150967_74558.8	499	0
ABCB9	ENSG00000150967_74559.9	995	0
ABCB9	ENSG00000150967_74560.10	245	0
ABCC1	ENSG00000103222_184975.1	272	0
ABCC1	ENSG00000103222_184976.2	506	0
ABCC1	ENSG00000103222_184977.3	800	0
ABCC1	ENSG00000103222_184978.4	487	0
ABCC1	ENSG00000103222_184979.5	645	0
ABCC1	ENSG00000103222_184980.6	606	17
ABCC1	ENSG00000103222_184981.7	280	0
ABCC1	ENSG00000103222_184982.8	460	0
ABCC1	ENSG00000103222_184983.9	45	0
ABCC1	ENSG00000103222_184984.10	220	0
ABCC10	ENSG00000124574_85138.1	439	0
ABCC10	ENSG00000124574_85139.2	516	77
ABCC10	ENSG00000124574_85140.3	146	0
ABCC10	ENSG00000124574_85141.4	927	18
ABCC10	ENSG00000124574_85142.5	1073	0
ABCC10	ENSG00000124574_85143.6	140	0
ABCC10	ENSG00000124574_85144.7	122	0
ABCC10	ENSG00000124574_85145.8	4	0
ABCC10	ENSG00000124574_85146.9	575	0
ABCC10	ENSG00000124574_85147.10	794	0
ABCC11	ENSG00000121270_52009.1	929	0
ABCC11	ENSG00000121270_52010.2	136	0
ABCC11	ENSG00000121270_52011.3	497	0
ABCC11	ENSG00000121270_52012.4	124	0
ABCC11	ENSG00000121270_52013.5	252	0
ABCC11	ENSG00000121270_52014.6	270	0
ABCC11	ENSG00000121270_52015.7	186	0
ABCC11	ENSG00000121270_52016.8	404	0
ABCC11	ENSG00000121270_52017.9	801	0
ABCC11	ENSG00000121270_52018.10	674	0
ABCC12	ENSG00000140798_102703.1	313	0
ABCC12	ENSG00000140798_102704.2	317	0
ABCC12	ENSG00000140798_102705.3	369	0
ABCC12	ENSG00000140798_102706.4	466	72
ABCC12	ENSG00000140798_102707.5	329	0
ABCC12	ENSG00000140798_102708.6	838	0
ABCC12	ENSG00000140798_102709.7	719	0
ABCC12	ENSG00000140798_102710.8	619	0
ABCC12	ENSG00000140798_102711.9	573	0
ABCC12	ENSG00000140798_102712.10	759	0
ABCC2	ENSG00000023839_106649.1	783	0
ABCC2	ENSG00000023839_106650.2	280	0
ABCC2	ENSG00000023839_106651.3	466	73
ABCC2	ENSG00000023839_106652.4	382	0
ABCC2	ENSG00000023839_106653.5	44	81
ABCC2	ENSG00000023839_106654.6	209	0
ABCC2	ENSG00000023839_106655.7	307	0
ABCC2	ENSG00000023839_106656.8	445	0
ABCC2	ENSG00000023839_106657.9	266	90
ABCC2	ENSG00000023839_106658.10	249	0
ABCC3	ENSG00000108846_64038.1	475	0
ABCC3	ENSG00000108846_64039.2	825	19
ABCC3	ENSG00000108846_64040.3	154	0
ABCC3	ENSG00000108846_64041.4	125	0
ABCC3	ENSG00000108846_64042.5	583	0
ABCC3	ENSG00000108846_64043.6	352	0
ABCC3	ENSG00000108846_64044.7	215	0
ABCC3	ENSG00000108846_64045.8	124	0
ABCC3	ENSG00000108846_64046.9	371	0
ABCC3	ENSG00000108846_64047.10	431	0
ABCC4	ENSG00000125257_99145.1	592	0
ABCC4	ENSG00000125257_99146.2	240	0
ABCC4	ENSG00000125257_99147.3	532	17
ABCC4	ENSG00000125257_99148.4	265	0
ABCC4	ENSG00000125257_99149.5	379	0
ABCC4	ENSG00000125257_99150.6	208	0
ABCC4	ENSG00000125257_99151.7	297	0
ABCC4	ENSG00000125257_99152.8	318	0
ABCC4	ENSG00000125257_99153.9	748	0
ABCC4	ENSG00000125257_99154.10	459	61
ABCC5	ENSG00000114770_39795.1	318	0
ABCC5	ENSG00000114770_39796.2	170	0
ABCC5	ENSG00000114770_39797.3	133	0
ABCC5	ENSG00000114770_39798.4	337	0
ABCC5	ENSG00000114770_39799.5	67	0
ABCC5	ENSG00000114770_39800.6	93	0
ABCC5	ENSG00000114770_39801.7	1299	0
ABCC5	ENSG00000114770_39802.8	120	0
ABCC5	ENSG00000114770_39803.9	414	0
ABCC5	ENSG00000114770_39804.10	126	0
ABCC6	ENSG00000091262_36015.1	458	0
ABCC6	ENSG00000091262_36016.2	464	0
ABCC6	ENSG00000091262_36017.3	665	27
ABCC6	ENSG00000091262_36018.4	145	0
ABCC6	ENSG00000091262_36019.5	73	0
ABCC6	ENSG00000091262_36020.6	677	0
ABCC6	ENSG00000091262_36021.7	432	0
ABCC6	ENSG00000091262_36022.8	448	0
ABCC6	ENSG00000091262_36023.9	655	0
ABCC6	ENSG00000091262_36024.10	503	0
ABCC8	ENSG00000006071_12605.1	510	0
ABCC8	ENSG00000006071_12606.2	335	0
ABCC8	ENSG00000006071_12607.3	608	0
ABCC8	ENSG00000006071_12608.4	239	0
ABCC8	ENSG00000006071_12609.5	426	0
ABCC8	ENSG00000006071_12610.6	597	0
ABCC8	ENSG00000006071_12611.7	338	0
ABCC8	ENSG00000006071_12612.8	768	0
ABCC8	ENSG00000006071_12613.9	640	0
ABCC8	ENSG00000006071_12614.10	169	0
ABCC9	ENSG00000069431_97812.1	206	0
ABCC9	ENSG00000069431_97813.2	209	0
ABCC9	ENSG00000069431_97814.3	0	0
ABCC9	ENSG00000069431_97815.4	531	0
ABCC9	ENSG00000069431_97816.5	270	0
ABCC9	ENSG00000069431_97817.6	488	38
ABCC9	ENSG00000069431_97818.7	332	0
ABCC9	ENSG00000069431_97819.8	393	0
ABCC9	ENSG00000069431_97820.9	590	0
ABCC9	ENSG00000069431_97821.10	254	0
ABCD1	ENSG00000101986_76655.1	299	0
ABCD1	ENSG00000101986_76656.2	986	0
ABCD1	ENSG00000101986_76657.3	598	0
ABCD1	ENSG00000101986_76658.4	1022	0
ABCD1	ENSG00000101986_76659.5	395	0
ABCD1	ENSG00000101986_76660.6	496	0
ABCD1	ENSG00000101986_76661.7	731	0
ABCD1	ENSG00000101986_76662.8	330	0
ABCD1	ENSG00000101986_76663.9	765	0
ABCD1	ENSG00000101986_76664.10	218	0
ABCD2	ENSG00000173208_26385.1	373	0
ABCD2	ENSG00000173208_26386.2	335	0
ABCD2	ENSG00000173208_26387.3	299	0
ABCD2	ENSG00000173208_26388.4	617	56
ABCD2	ENSG00000173208_26389.5	409	0
ABCD2	ENSG00000173208_26390.6	612	0
ABCD2	ENSG00000173208_26391.7	601	69
ABCD2	ENSG00000173208_26392.8	790	0
ABCD2	ENSG00000173208_26393.9	824	0
ABCD2	ENSG00000173208_26394.10	235	0
ABCD3	ENSG00000117528_13385.1	462	0
ABCD3	ENSG00000117528_13386.2	409	0
ABCD3	ENSG00000117528_13387.3	568	0
ABCD3	ENSG00000117528_13388.4	141	0
ABCD3	ENSG00000117528_13389.5	56	0
ABCD3	ENSG00000117528_13390.6	890	0
ABCD3	ENSG00000117528_13391.7	120	0
ABCD3	ENSG00000117528_13392.8	0	0
ABCD3	ENSG00000117528_13393.9	173	0
ABCD3	ENSG00000117528_13394.10	589	0
ABCD4	ENSG00000119688_153032.1	431	0
ABCD4	ENSG00000119688_153033.2	312	0
ABCD4	ENSG00000119688_153034.3	543	0
ABCD4	ENSG00000119688_153035.4	341	0
ABCD4	ENSG00000119688_153036.5	323	0
ABCD4	ENSG00000119688_153037.6	552	0
ABCD4	ENSG00000119688_153038.7	190	0
ABCD4	ENSG00000119688_153039.8	364	0
ABCD4	ENSG00000119688_153040.9	223	0
ABCD4	ENSG00000119688_153041.10	270	0
ABCE1	ENSG00000164163_176934.1	41	0
ABCE1	ENSG00000164163_176935.2	236	0
ABCE1	ENSG00000164163_176936.3	829	0
ABCE1	ENSG00000164163_176937.4	930	0
ABCE1	ENSG00000164163_176938.5	92	0
ABCE1	ENSG00000164163_176939.6	9	0
ABCE1	ENSG00000164163_176940.7	62	0
ABCE1	ENSG00000164163_176941.8	172	0
ABCE1	ENSG00000164163_176942.9	122	0
ABCE1	ENSG00000164163_176943.10	64	0
ABCF1	ENSG00000204574_155234.1	567	0
ABCF1	ENSG00000204574_155235.2	220	0
ABCF1	ENSG00000204574_155236.3	100	0
ABCF1	ENSG00000204574_155237.4	11	0
ABCF1	ENSG00000204574_155238.5	232	0
ABCF1	ENSG00000204574_155239.6	282	0
ABCF1	ENSG00000204574_155240.7	322	0
ABCF1	ENSG00000204574_155241.8	839	0
ABCF1	ENSG00000204574_155242.9	570	0
ABCF1	ENSG00000204574_155243.10	659	0
ABCF2	ENSG00000033050_128200.1	351	0
ABCF2	ENSG00000033050_128201.2	331	0
ABCF2	ENSG00000033050_128202.3	743	21
ABCF2	ENSG00000033050_128203.4	350	0
ABCF2	ENSG00000033050_128204.5	930	0
ABCF2	ENSG00000033050_128205.6	731	0
ABCF2	ENSG00000033050_128206.7	997	0
ABCF2	ENSG00000033050_128207.8	477	0
ABCF2	ENSG00000033050_128208.9	469	0
ABCF2	ENSG00000033050_128209.10	364	0
ABCF3	ENSG00000161204_159604.1	396	0
ABCF3	ENSG00000161204_159605.2	587	0
ABCF3	ENSG00000161204_159606.3	75	0
ABCF3	ENSG00000161204_159607.4	122	0
ABCF3	ENSG00000161204_159608.5	650	9
ABCF3	ENSG00000161204_159609.6	221	0
ABCF3	ENSG00000161204_159610.7	218	0
ABCF3	ENSG00000161204_159611.8	373	0
ABCF3	ENSG00000161204_159612.9	321	0
ABCF3	ENSG00000161204_159613.10	322	0
ABCG1	ENSG00000160179_181835.1	344	0
ABCG1	ENSG00000160179_181836.2	522	0
ABCG1	ENSG00000160179_181837.3	322	0
ABCG1	ENSG00000160179_181838.4	163	0
ABCG1	ENSG00000160179_181839.5	303	0
ABCG1	ENSG00000160179_181840.6	400	75
ABCG1	ENSG00000160179_181841.7	364	0
ABCG1	ENSG00000160179_181842.8	331	0
ABCG1	ENSG00000160179_181843.9	575	0
ABCG1	ENSG00000160179_181844.10	270	0
ABCG2	ENSG00000118777_65136.1	204	0
ABCG2	ENSG00000118777_65137.2	680	92
ABCG2	ENSG00000118777_65138.3	507	0
ABCG2	ENSG00000118777_65139.4	130	0
ABCG2	ENSG00000118777_65140.5	774	3
ABCG2	ENSG00000118777_65141.6	423	0
ABCG2	ENSG00000118777_65142.7	485	0
ABCG2	ENSG00000118777_65143.8	198	0
ABCG2	ENSG00000118777_65144.9	362	0
ABCG2	ENSG00000118777_65145.10	214	0
ABCG4	ENSG00000172350_15392.1	729	0
ABCG4	ENSG00000172350_15393.2	536	15
ABCG4	ENSG00000172350_15394.3	37	0
ABCG4	ENSG00000172350_15395.4	885	0
ABCG4	ENSG00000172350_15396.5	573	0
ABCG4	ENSG00000172350_15397.6	251	0
ABCG4	ENSG00000172350_15398.7	138	0
ABCG4	ENSG00000172350_15399.8	588	0
ABCG4	ENSG00000172350_15400.9	549	0
ABCG4	ENSG00000172350_15401.10	478	0
ABCG5	ENSG00000138075_72202.1	587	0
ABCG5	ENSG00000138075_72203.2	1002	0
ABCG5	ENSG00000138075_72204.3	888	0
ABCG5	ENSG00000138075_72205.4	678	78
ABCG5	ENSG00000138075_72206.5	387	0
ABCG5	ENSG00000138075_72207.6	245	0
ABCG5	ENSG00000138075_72208.7	230	0
ABCG5	ENSG00000138075_72209.8	427	0
ABCG5	ENSG00000138075_72210.9	99	0
ABCG5	ENSG00000138075_72211.10	69	0
ABCG8	ENSG00000143921_136739.1	130	49
ABCG8	ENSG00000143921_136740.2	91	0
ABCG8	ENSG00000143921_136741.3	547	0
ABCG8	ENSG00000143921_136742.4	499	0
ABCG8	ENSG00000143921_136743.5	491	0
ABCG8	ENSG00000143921_136744.6	106	0
ABCG8	ENSG00000143921_136745.7	286	0
ABCG8	ENSG00000143921_136746.8	189	0
ABCG8	ENSG00000143921_136747.9	108	0
ABCG8	ENSG00000143921_136748.10	286	0
ABHD1	ENSG00000143994_74871.1	538	0
ABHD1	ENSG00000143994_74872.2	160	0
ABHD1	ENSG00000143994_74873.3	70	0
ABHD1	ENSG00000143994_74874.4	316	106
ABHD1	ENSG00000143994_74875.5	238	0
ABHD1	ENSG00000143994_74876.6	30	0
ABHD1	ENSG00000143994_74877.7	388	0
ABHD1	ENSG00000143994_74878.8	458	0
ABHD1	ENSG00000143994_74879.9	177	0
ABHD1	ENSG00000143994_74880.10	207	0
ABHD10	ENSG00000144827_109870.1	339	0
ABHD10	ENSG00000144827_109871.2	171	0
ABHD10	ENSG00000144827_109872.3	838	0
ABHD10	ENSG00000144827_109873.4	126	0
ABHD10	ENSG00000144827_109874.5	165	0
ABHD10	ENSG00000144827_109875.6	459	0
ABHD10	ENSG00000144827_109876.7	411	81
ABHD10	ENSG00000144827_109877.8	355	0
ABHD10	ENSG00000144827_109878.9	221	0
ABHD10	ENSG00000144827_109879.10	475	0
ABHD11	ENSG00000106077_170191.1	320	0
ABHD11	ENSG00000106077_170192.2	253	0
ABHD11	ENSG00000106077_170193.3	196	0
ABHD11	ENSG00000106077_170194.4	206	0
ABHD11	ENSG00000106077_170195.5	534	0
ABHD11	ENSG00000106077_170196.6	529	0
ABHD11	ENSG00000106077_170197.7	288	0
ABHD11	ENSG00000106077_170198.8	163	0
ABHD11	ENSG00000106077_170199.9	336	0
ABHD11	ENSG00000106077_170200.10	560	0
ABHD12	ENSG00000100997_45551.1	242	0
ABHD12	ENSG00000100997_45552.2	64	0
ABHD12	ENSG00000100997_45553.3	294	0
ABHD12	ENSG00000100997_45554.4	322	0
ABHD12	ENSG00000100997_45555.5	492	0
ABHD12	ENSG00000100997_45556.6	373	0
ABHD12	ENSG00000100997_45557.7	367	0
ABHD12	ENSG00000100997_45558.8	125	0
ABHD12	ENSG00000100997_45559.9	456	0
ABHD12	ENSG00000100997_45560.10	158	0
ABHD12B	ENSG00000131969_193916.1	115	0
ABHD12B	ENSG00000131969_193917.2	69	0
ABHD12B	ENSG00000131969_193918.3	813	171
ABHD12B	ENSG00000131969_193919.4	1384	0
ABHD12B	ENSG00000131969_193920.5	167	0
ABHD12B	ENSG00000131969_193921.6	599	0
ABHD12B	ENSG00000131969_193922.7	326	0
ABHD12B	ENSG00000131969_193923.8	119	0
ABHD12B	ENSG00000131969_193924.9	1632	16
ABHD12B	ENSG00000131969_193925.10	95	0
ABHD13	ENSG00000139826_32253.1	537	0
ABHD13	ENSG00000139826_32254.2	201	0
ABHD13	ENSG00000139826_32255.3	241	0
ABHD13	ENSG00000139826_32256.4	40	0
ABHD13	ENSG00000139826_32257.5	723	0
ABHD13	ENSG00000139826_32258.6	519	0
ABHD13	ENSG00000139826_32259.7	517	0
ABHD13	ENSG00000139826_32260.8	421	0
ABHD13	ENSG00000139826_32261.9	635	37
ABHD13	ENSG00000139826_32262.10	163	0
ABHD14A	ENSG00000248487_96353.1	349	0
ABHD14A	ENSG00000248487_96354.2	331	0
ABHD14A	ENSG00000248487_96355.3	257	0
ABHD14A	ENSG00000248487_96356.4	351	0
ABHD14A	ENSG00000248487_96357.5	496	0
ABHD14A	ENSG00000248487_96358.6	169	0
ABHD14A	ENSG00000248487_96359.7	174	0
ABHD14A	ENSG00000248487_96360.8	66	0
ABHD14A	ENSG00000248487_96361.9	107	0
ABHD14A	ENSG00000248487_96362.10	243	0
ABHD14A-ACY1	ENSG00000114786_86351.1	351	0
ABHD14A-ACY1	ENSG00000114786_86352.2	496	0
ABHD14A-ACY1	ENSG00000114786_86353.3	349	0
ABHD14A-ACY1	ENSG00000114786_86354.4	331	0
ABHD14A-ACY1	ENSG00000114786_86355.5	257	0
ABHD14A-ACY1	ENSG00000114786_86356.6	169	0
ABHD14A-ACY1	ENSG00000114786_86357.7	243	0
ABHD14A-ACY1	ENSG00000114786_86358.8	756	0
ABHD14A-ACY1	ENSG00000114786_86359.9	556	0
ABHD14A-ACY1	ENSG00000114786_86360.10	237	0
ABHD14B	ENSG00000114779_39845.1	133	0
ABHD14B	ENSG00000114779_39846.2	66	0
ABHD14B	ENSG00000114779_39847.3	157	0
ABHD14B	ENSG00000114779_39848.4	55	0
ABHD14B	ENSG00000114779_39849.5	485	0
ABHD14B	ENSG00000114779_39850.6	359	0
ABHD14B	ENSG00000114779_39851.7	246	0
ABHD14B	ENSG00000114779_39852.8	65	0
ABHD14B	ENSG00000114779_39853.9	529	0
ABHD14B	ENSG00000114779_39854.10	189	0
ABHD15	ENSG00000168792_110918.1	1014	0
ABHD15	ENSG00000168792_110919.2	453	0
ABHD15	ENSG00000168792_110920.3	478	0
ABHD15	ENSG00000168792_110921.4	192	0
ABHD15	ENSG00000168792_110922.5	211	0
ABHD15	ENSG00000168792_110923.6	299	0
ABHD15	ENSG00000168792_110924.7	208	0
ABHD15	ENSG00000168792_110925.8	268	0
ABHD15	ENSG00000168792_110926.9	1049	0
ABHD15	ENSG00000168792_110927.10	273	0
ABHD16A	ENSG00000204427_95973.1	100	0
ABHD16A	ENSG00000204427_95974.2	367	0
ABHD16A	ENSG00000204427_95975.3	74	0
ABHD16A	ENSG00000204427_95976.4	57	0
ABHD16A	ENSG00000204427_95977.5	538	0
ABHD16A	ENSG00000204427_95978.6	473	0
ABHD16A	ENSG00000204427_95979.7	296	0
ABHD16A	ENSG00000204427_95980.8	77	0
ABHD16A	ENSG00000204427_95981.9	187	0
ABHD16A	ENSG00000204427_95982.10	281	0
ABHD16B	ENSG00000183260_4992.1	178	0
ABHD16B	ENSG00000183260_4993.2	831	0
ABHD16B	ENSG00000183260_4994.3	285	0
ABHD16B	ENSG00000183260_4995.4	652	0
ABHD16B	ENSG00000183260_4996.5	37	0
ABHD16B	ENSG00000183260_4997.6	8	0
ABHD16B	ENSG00000183260_4998.7	128	0
ABHD16B	ENSG00000183260_4999.8	580	0
ABHD16B	ENSG00000183260_5000.9	519	0
ABHD16B	ENSG00000183260_5001.10	687	134
ABHD17A	ENSG00000129968_162840.1	672	0
ABHD17A	ENSG00000129968_162841.2	147	0
ABHD17A	ENSG00000129968_162842.3	888	0
ABHD17A	ENSG00000129968_162843.4	276	0
ABHD17A	ENSG00000129968_162844.5	257	0
ABHD17A	ENSG00000129968_162845.6	558	0
ABHD17A	ENSG00000129968_162846.7	104	0
ABHD17A	ENSG00000129968_162847.8	618	0
ABHD17A	ENSG00000129968_162848.9	656	0
ABHD17A	ENSG00000129968_162849.10	473	0
ABHD17B	ENSG00000107362_120175.1	52	0
ABHD17B	ENSG00000107362_120176.2	735	0
ABHD17B	ENSG00000107362_120177.3	185	0
ABHD17B	ENSG00000107362_120178.4	749	0
ABHD17B	ENSG00000107362_120179.5	1046	0
ABHD17B	ENSG00000107362_120180.6	453	0
ABHD17B	ENSG00000107362_120181.7	896	0
ABHD17B	ENSG00000107362_120182.8	0	0
ABHD17B	ENSG00000107362_120183.9	30	0
ABHD17B	ENSG00000107362_120184.10	251	0
ABHD17C	ENSG00000136379_120265.1	807	0
ABHD17C	ENSG00000136379_120266.2	514	0
ABHD17C	ENSG00000136379_120267.3	224	0
ABHD17C	ENSG00000136379_120268.4	307	0
ABHD17C	ENSG00000136379_120269.5	484	0
ABHD17C	ENSG00000136379_120270.6	152	0
ABHD17C	ENSG00000136379_120271.7	136	0
ABHD17C	ENSG00000136379_120272.8	1349	0
ABHD17C	ENSG00000136379_120273.9	464	0
ABHD17C	ENSG00000136379_120274.10	1005	0
ABHD2	ENSG00000140526_21224.1	502	0
ABHD2	ENSG00000140526_21225.2	167	0
ABHD2	ENSG00000140526_21226.3	148	0
ABHD2	ENSG00000140526_21227.4	237	0
ABHD2	ENSG00000140526_21228.5	279	0
ABHD2	ENSG00000140526_21229.6	408	0
ABHD2	ENSG00000140526_21230.7	326	0
ABHD2	ENSG00000140526_21231.8	347	0
ABHD2	ENSG00000140526_21232.9	301	0
ABHD2	ENSG00000140526_21233.10	375	0
ABHD3	ENSG00000158201_78533.1	1871	5
ABHD3	ENSG00000158201_78534.2	218	0
ABHD3	ENSG00000158201_78535.3	520	0
ABHD3	ENSG00000158201_78536.4	334	0
ABHD3	ENSG00000158201_78537.5	230	0
ABHD3	ENSG00000158201_78538.6	602	0
ABHD3	ENSG00000158201_78539.7	275	0
ABHD3	ENSG00000158201_78540.8	426	0
ABHD3	ENSG00000158201_78541.9	516	0
ABHD3	ENSG00000158201_78542.10	357	0
ABHD4	ENSG00000100439_44480.1	666	0
ABHD4	ENSG00000100439_44481.2	140	0
ABHD4	ENSG00000100439_44482.3	449	0
ABHD4	ENSG00000100439_44483.4	521	123
ABHD4	ENSG00000100439_44484.5	576	0
ABHD4	ENSG00000100439_44485.6	190	0
ABHD4	ENSG00000100439_44486.7	330	0
ABHD4	ENSG00000100439_44487.8	346	0
ABHD4	ENSG00000100439_44488.9	846	0
ABHD4	ENSG00000100439_44489.10	169	0
ABHD5	ENSG00000011198_108491.1	232	0
ABHD5	ENSG00000011198_108492.2	362	0
ABHD5	ENSG00000011198_108493.3	230	0
ABHD5	ENSG00000011198_108494.4	303	0
ABHD5	ENSG00000011198_108495.5	347	0
ABHD5	ENSG00000011198_108496.6	126	0
ABHD5	ENSG00000011198_108497.7	510	0
ABHD5	ENSG00000011198_108498.8	567	17
ABHD5	ENSG00000011198_108499.9	284	0
ABHD5	ENSG00000011198_108500.10	170	106
ABHD6	ENSG00000163686_57306.1	422	0
ABHD6	ENSG00000163686_57307.2	905	0
ABHD6	ENSG00000163686_57308.3	446	0
ABHD6	ENSG00000163686_57309.4	705	0
ABHD6	ENSG00000163686_57310.5	490	0
ABHD6	ENSG00000163686_57311.6	463	0
ABHD6	ENSG00000163686_57312.7	397	0
ABHD6	ENSG00000163686_57313.8	488	109
ABHD6	ENSG00000163686_57314.9	971	0
ABHD6	ENSG00000163686_57315.10	564	0
ABHD8	ENSG00000127220_102185.1	232	0
ABHD8	ENSG00000127220_102186.2	265	0
ABHD8	ENSG00000127220_102187.3	126	0
ABHD8	ENSG00000127220_102188.4	359	0
ABHD8	ENSG00000127220_102189.5	468	0
ABHD8	ENSG00000127220_102190.6	485	0
ABHD8	ENSG00000127220_102191.7	488	0
ABHD8	ENSG00000127220_102192.8	877	0
ABHD8	ENSG00000127220_102193.9	1322	0
ABHD8	ENSG00000127220_102194.10	610	0
ABI1	ENSG00000136754_5230.1	497	0
ABI1	ENSG00000136754_5231.2	386	0
ABI1	ENSG00000136754_5232.3	535	0
ABI1	ENSG00000136754_5233.4	291	0
ABI1	ENSG00000136754_5234.5	231	0
ABI1	ENSG00000136754_5235.6	185	0
ABI1	ENSG00000136754_5236.7	279	0
ABI1	ENSG00000136754_5237.8	432	0
ABI1	ENSG00000136754_5238.9	869	0
ABI1	ENSG00000136754_5239.10	264	0
ABI2	ENSG00000138443_179285.1	300	0
ABI2	ENSG00000138443_179286.2	37	0
ABI2	ENSG00000138443_179287.3	320	0
ABI2	ENSG00000138443_179288.4	644	0
ABI2	ENSG00000138443_179289.5	85	0
ABI2	ENSG00000138443_179290.6	512	0
ABI2	ENSG00000138443_179291.7	394	0
ABI2	ENSG00000138443_179292.8	401	0
ABI2	ENSG00000138443_179293.9	384	0
ABI2	ENSG00000138443_179294.10	196	0
ABI3	ENSG00000108798_29203.1	956	0
ABI3	ENSG00000108798_29204.2	202	0
ABI3	ENSG00000108798_29205.3	177	0
ABI3	ENSG00000108798_29206.4	0	0
ABI3	ENSG00000108798_29207.5	426	0
ABI3	ENSG00000108798_29208.6	353	70
ABI3	ENSG00000108798_29209.7	121	0
ABI3	ENSG00000108798_29210.8	428	0
ABI3	ENSG00000108798_29211.9	159	0
ABI3	ENSG00000108798_29212.10	554	0
ABI3BP	ENSG00000154175_153413.1	1123	0
ABI3BP	ENSG00000154175_153414.2	124	0
ABI3BP	ENSG00000154175_153415.3	208	0
ABI3BP	ENSG00000154175_153416.4	101	0
ABI3BP	ENSG00000154175_153417.5	141	0
ABI3BP	ENSG00000154175_153418.6	660	0
ABI3BP	ENSG00000154175_153419.7	1082	0
ABI3BP	ENSG00000154175_153420.8	1829	0
ABI3BP	ENSG00000154175_153421.9	565	0
ABI3BP	ENSG00000154175_153422.10	293	0
ABL1	ENSG00000097007_200869.1	252	0
ABL1	ENSG00000097007_200870.2	431	0
ABL1	ENSG00000097007_200871.3	378	0
ABL1	ENSG00000097007_200872.4	88	0
ABL1	ENSG00000097007_200873.5	120	0
ABL1	ENSG00000097007_200874.6	542	12
ABL1	ENSG00000097007_200875.7	373	0
ABL1	ENSG00000097007_200876.8	248	0
ABL1	ENSG00000097007_200877.9	280	0
ABL1	ENSG00000097007_200878.10	349	0
ABL2	ENSG00000143322_201759.1	117	0
ABL2	ENSG00000143322_201760.2	1769	0
ABL2	ENSG00000143322_201761.3	509	0
ABL2	ENSG00000143322_201762.4	67	0
ABL2	ENSG00000143322_201763.5	353	0
ABL2	ENSG00000143322_201764.6	223	0
ABL2	ENSG00000143322_201765.7	270	0
ABL2	ENSG00000143322_201766.8	754	0
ABL2	ENSG00000143322_201767.9	264	0
ABL2	ENSG00000143322_201768.10	124	0
ABLIM1	ENSG00000099204_50029.1	426	0
ABLIM1	ENSG00000099204_50030.2	52	0
ABLIM1	ENSG00000099204_50031.3	442	0
ABLIM1	ENSG00000099204_50032.4	654	0
ABLIM1	ENSG00000099204_50033.5	22	0
ABLIM1	ENSG00000099204_50034.6	260	0
ABLIM1	ENSG00000099204_50035.7	650	0
ABLIM1	ENSG00000099204_50036.8	455	0
ABLIM1	ENSG00000099204_50037.9	132	0
ABLIM1	ENSG00000099204_50038.10	113	0
ABLIM2	ENSG00000163995_7284.1	492	0
ABLIM2	ENSG00000163995_7285.2	401	0
ABLIM2	ENSG00000163995_7286.3	0	0
ABLIM2	ENSG00000163995_7287.4	399	0
ABLIM2	ENSG00000163995_7288.5	323	0
ABLIM2	ENSG00000163995_7289.6	577	0
ABLIM2	ENSG00000163995_7290.7	765	0
ABLIM2	ENSG00000163995_7291.8	86	0
ABLIM2	ENSG00000163995_7292.9	226	0
ABLIM2	ENSG00000163995_7293.10	343	0
ABLIM3	ENSG00000173210_40703.1	220	0
ABLIM3	ENSG00000173210_40704.2	115	0
ABLIM3	ENSG00000173210_40705.3	299	0
ABLIM3	ENSG00000173210_40706.4	300	0
ABLIM3	ENSG00000173210_40707.5	746	0
ABLIM3	ENSG00000173210_40708.6	75	0
ABLIM3	ENSG00000173210_40709.7	393	0
ABLIM3	ENSG00000173210_40710.8	194	0
ABLIM3	ENSG00000173210_40711.9	451	0
ABLIM3	ENSG00000173210_40712.10	320	8
ABR	ENSG00000159842_27295.1	253	0
ABR	ENSG00000159842_27296.2	270	1
ABR	ENSG00000159842_27297.3	490	0
ABR	ENSG00000159842_27298.4	350	0
ABR	ENSG00000159842_27299.5	113	0
ABR	ENSG00000159842_27300.6	118	0
ABR	ENSG00000159842_27301.7	603	0
ABR	ENSG00000159842_27302.8	559	0
ABR	ENSG00000159842_27303.9	466	0
ABR	ENSG00000159842_27304.10	242	0
ABRA	ENSG00000174429_2069.1	365	167
ABRA	ENSG00000174429_2070.2	24	0
ABRA	ENSG00000174429_2071.3	428	0
ABRA	ENSG00000174429_2072.4	82	0
ABRA	ENSG00000174429_2073.5	310	0
ABRA	ENSG00000174429_2074.6	136	0
ABRA	ENSG00000174429_2075.7	56	0
ABRA	ENSG00000174429_2076.8	364	0
ABRA	ENSG00000174429_2077.9	300	0
ABRA	ENSG00000174429_2078.10	82	0
ABRACL	ENSG00000146386_82129.1	215	0
ABRACL	ENSG00000146386_82130.2	326	0
ABRACL	ENSG00000146386_82131.3	103	0
ABRACL	ENSG00000146386_82132.4	374	68
ABRACL	ENSG00000146386_82133.5	379	0
ABRACL	ENSG00000146386_82134.6	225	0
ABRACL	ENSG00000146386_82135.7	168	0
ABRACL	ENSG00000146386_82136.8	60	0
ABRACL	ENSG00000146386_82137.9	1397	0
ABRACL	ENSG00000146386_82138.10	195	0
ABT1	ENSG00000146109_74781.1	523	0
ABT1	ENSG00000146109_74782.2	188	0
ABT1	ENSG00000146109_74783.3	102	0
ABT1	ENSG00000146109_74784.4	166	0
ABT1	ENSG00000146109_74785.5	0	0
ABT1	ENSG00000146109_74786.6	192	0
ABT1	ENSG00000146109_74787.7	159	0
ABT1	ENSG00000146109_74788.8	112	0
ABT1	ENSG00000146109_74789.9	24	0
ABT1	ENSG00000146109_74790.10	749	0
ABTB1	ENSG00000114626_155384.1	242	0
ABTB1	ENSG00000114626_155385.2	715	0
ABTB1	ENSG00000114626_155386.3	86	0
ABTB1	ENSG00000114626_155387.4	354	0
ABTB1	ENSG00000114626_155388.5	631	0
ABTB1	ENSG00000114626_155389.6	445	0
ABTB1	ENSG00000114626_155390.7	299	0
ABTB1	ENSG00000114626_155391.8	579	0
ABTB1	ENSG00000114626_155392.9	775	0
ABTB1	ENSG00000114626_155393.10	507	0
ABTB2	ENSG00000166016_152770.1	516	0
ABTB2	ENSG00000166016_152771.2	0	0
ABTB2	ENSG00000166016_152772.3	80	0
ABTB2	ENSG00000166016_152773.4	235	0
ABTB2	ENSG00000166016_152774.5	854	0
ABTB2	ENSG00000166016_152775.6	283	0
ABTB2	ENSG00000166016_152776.7	109	0
ABTB2	ENSG00000166016_152777.8	17	0
ABTB2	ENSG00000166016_152778.9	206	0
ABTB2	ENSG00000166016_152779.10	831	0
AC000003.2	ENSG00000264194_16790.1	290	0
AC000003.2	ENSG00000264194_16791.2	576	0
AC000003.2	ENSG00000264194_16792.3	196	0
AC000003.2	ENSG00000264194_16793.4	0	0
AC000003.2	ENSG00000264194_16794.5	472	0
AC000003.2	ENSG00000264194_16795.6	707	0
AC000003.2	ENSG00000264194_16796.7	368	0
AC000003.2	ENSG00000264194_16797.8	1072	0
AC000003.2	ENSG00000264194_16798.9	961	0
AC000003.2	ENSG00000264194_16799.10	636	0
AC002310.13	ENSG00000260869_135457.1	825	0
AC002310.13	ENSG00000260869_135458.2	166	0
AC002310.13	ENSG00000260869_135459.3	224	0
AC002310.13	ENSG00000260869_135460.4	191	0
AC002310.13	ENSG00000260869_135461.5	142	0
AC002310.13	ENSG00000260869_135462.6	762	64
AC002310.13	ENSG00000260869_135463.7	469	27
AC002310.13	ENSG00000260869_135464.8	172	0
AC002310.13	ENSG00000260869_135465.9	913	0
AC002310.13	ENSG00000260869_135466.10	794	0
AC002365.1	ENSG00000234469_129335.1	80	0
AC002365.1	ENSG00000234469_129336.2	654	0
AC002365.1	ENSG00000234469_129337.3	617	0
AC002365.1	ENSG00000234469_129338.4	987	0
AC002365.1	ENSG00000234469_129339.5	105	0
AC002365.1	ENSG00000234469_129340.6	247	0
AC002365.1	ENSG00000234469_129341.7	56	0
AC002365.1	ENSG00000234469_129342.8	497	0
AC002365.1	ENSG00000234469_129343.9	85	57
AC002365.1	ENSG00000234469_129344.10	453	0
AC002398.9	ENSG00000188223_147890.1	528	0
AC002398.9	ENSG00000188223_147891.2	692	0
AC002398.9	ENSG00000188223_147892.3	12	0
AC002398.9	ENSG00000188223_147893.4	146	0
AC002398.9	ENSG00000188223_147894.5	943	0
AC002398.9	ENSG00000188223_147895.6	424	0
AC002398.9	ENSG00000188223_147896.7	591	0
AC002398.9	ENSG00000188223_147897.8	118	0
AC002398.9	ENSG00000188223_147898.9	170	0
AC002398.9	ENSG00000188223_147899.10	316	0
AC002451.1	ENSG00000269449_133064.1	672	0
AC002451.1	ENSG00000269449_133065.2	51	0
AC002451.1	ENSG00000269449_133066.3	51	0
AC002451.1	ENSG00000269449_133067.4	0	0
AC002451.1	ENSG00000269449_133068.5	33	0
AC002451.1	ENSG00000269449_133069.6	1	0
AC002451.1	ENSG00000269449_133070.7	0	0
AC002451.1	ENSG00000269449_133071.8	0	0
AC002451.1	ENSG00000269449_133072.9	0	0
AC002451.1	ENSG00000269449_133073.10	117	0
AC002472.1	ENSG00000269103_126002.1	137	0
AC002472.1	ENSG00000269103_126003.2	641	0
AC002472.1	ENSG00000269103_126004.3	19	0
AC002472.1	ENSG00000269103_126005.4	0	0
AC002472.1	ENSG00000269103_126006.5	0	0
AC002472.1	ENSG00000269103_126007.6	82	0
AC002472.1	ENSG00000269103_126008.7	0	0
AC002472.1	ENSG00000269103_126009.8	16	0
AC002472.1	ENSG00000269103_126010.9	0	0
AC002472.1	ENSG00000269103_126011.10	204	0
AC002472.13	ENSG00000187905_21474.1	323	0
AC002472.13	ENSG00000187905_21475.2	291	0
AC002472.13	ENSG00000187905_21476.3	407	0
AC002472.13	ENSG00000187905_21477.4	286	0
AC002472.13	ENSG00000187905_21478.5	419	0
AC002472.13	ENSG00000187905_21479.6	215	0
AC002472.13	ENSG00000187905_21480.7	84	0
AC002472.13	ENSG00000187905_21481.8	859	0
AC002472.13	ENSG00000187905_21482.9	363	0
AC002472.13	ENSG00000187905_21483.10	571	0
AC002985.3	ENSG00000268193_15814.1	837	0
AC002985.3	ENSG00000268193_15815.2	636	0
AC002985.3	ENSG00000268193_15816.3	767	0
AC002985.3	ENSG00000268193_15817.4	574	0
AC002985.3	ENSG00000268193_15818.5	700	0
AC002985.3	ENSG00000268193_15819.6	734	0
AC002985.3	ENSG00000268193_15820.7	170	0
AC002985.3	ENSG00000268193_15821.8	466	0
AC002985.3	ENSG00000268193_15822.9	416	0
AC002985.3	ENSG00000268193_15823.10	589	0
AC003002.4	ENSG00000268133_199914.1	642	0
AC003002.4	ENSG00000268133_199915.2	95	0
AC003002.4	ENSG00000268133_199916.3	1049	29
AC003002.4	ENSG00000268133_199917.4	1830	0
AC003002.4	ENSG00000268133_199918.5	1275	0
AC003002.4	ENSG00000268133_199919.6	528	0
AC003002.4	ENSG00000268133_199920.7	553	0
AC003002.4	ENSG00000268133_199921.8	334	0
AC003002.4	ENSG00000268133_199922.9	874	0
AC003002.4	ENSG00000268133_199923.10	601	0
AC003002.6	ENSG00000269533_38785.1	1055	0
AC003002.6	ENSG00000269533_38786.2	1001	0
AC003002.6	ENSG00000269533_38787.3	322	0
AC003002.6	ENSG00000269533_38788.4	469	0
AC003002.6	ENSG00000269533_38789.5	508	53
AC003002.6	ENSG00000269533_38790.6	300	0
AC003002.6	ENSG00000269533_38791.7	364	0
AC003002.6	ENSG00000269533_38792.8	353	0
AC003002.6	ENSG00000269533_38793.9	806	0
AC003002.6	ENSG00000269533_38794.10	390	0
AC003005.4	ENSG00000268107_84109.1	477	0
AC003005.4	ENSG00000268107_84110.2	561	0
AC003005.4	ENSG00000268107_84111.3	600	18
AC003005.4	ENSG00000268107_84112.4	801	0
AC003005.4	ENSG00000268107_84113.5	89	0
AC003005.4	ENSG00000268107_84114.6	286	0
AC003005.4	ENSG00000268107_84115.7	436	0
AC003005.4	ENSG00000268107_84116.8	190	0
AC003005.4	ENSG00000268107_84117.9	1008	106
AC003005.4	ENSG00000268107_84118.10	260	20
AC003006.7	ENSG00000269026_143522.1	555	0
AC003006.7	ENSG00000269026_143523.2	752	0
AC003006.7	ENSG00000269026_143524.3	467	0
AC003006.7	ENSG00000269026_143525.4	190	0
AC003006.7	ENSG00000269026_143526.5	261	0
AC003006.7	ENSG00000269026_143527.6	283	0
AC003006.7	ENSG00000269026_143528.7	924	0
AC003006.7	ENSG00000269026_143529.8	264	0
AC003006.7	ENSG00000269026_143530.9	940	0
AC003006.7	ENSG00000269026_143531.10	401	0
AC003043.1	ENSG00000268413_11276.1	189	0
AC003101.1	ENSG00000228768_107953.1	950	89
AC003101.1	ENSG00000228768_107954.2	319	0
AC003101.1	ENSG00000228768_107955.3	110	0
AC003101.1	ENSG00000228768_107956.4	51	0
AC003101.1	ENSG00000228768_107957.5	97	0
AC003101.1	ENSG00000228768_107958.6	831	0
AC003101.1	ENSG00000228768_107959.7	346	0
AC003101.1	ENSG00000228768_107960.8	174	0
AC003101.1	ENSG00000228768_107961.9	0	0
AC003101.1	ENSG00000228768_107962.10	781	0
AC003102.1	ENSG00000214921_53878.1	58	0
AC003102.1	ENSG00000214921_53879.2	203	0
AC003102.1	ENSG00000214921_53880.3	50	0
AC003102.1	ENSG00000214921_53881.4	665	0
AC003102.1	ENSG00000214921_53882.5	276	0
AC003102.1	ENSG00000214921_53883.6	490	0
AC003102.1	ENSG00000214921_53884.7	374	0
AC003102.1	ENSG00000214921_53885.8	186	0
AC003102.1	ENSG00000214921_53886.9	22	0
AC003102.1	ENSG00000214921_53887.10	36	0
AC004017.1	ENSG00000268948_194098.1	0	0
AC004017.1	ENSG00000268948_194099.2	64	0
AC004017.1	ENSG00000268948_194100.3	0	0
AC004017.1	ENSG00000268948_194101.4	0	0
AC004017.1	ENSG00000268948_194102.5	44	0
AC004017.1	ENSG00000268948_194103.6	82	0
AC004017.1	ENSG00000268948_194104.7	99	0
AC004017.1	ENSG00000268948_194105.8	61	0
AC004017.1	ENSG00000268948_194106.9	165	0
AC004017.1	ENSG00000268948_194107.10	5	0
AC004076.7	ENSG00000268533_182512.1	1054	0
AC004076.7	ENSG00000268533_182513.2	807	0
AC004076.7	ENSG00000268533_182514.3	95	0
AC004076.7	ENSG00000268533_182515.4	170	0
AC004076.7	ENSG00000268533_182516.5	1138	0
AC004076.7	ENSG00000268533_182517.6	256	0
AC004076.7	ENSG00000268533_182518.7	134	0
AC004076.7	ENSG00000268533_182519.8	39	0
AC004076.7	ENSG00000268533_182520.9	0	0
AC004076.7	ENSG00000268533_182521.10	0	0
AC004076.9	ENSG00000268163_52397.1	353	0
AC004076.9	ENSG00000268163_52398.2	433	0
AC004076.9	ENSG00000268163_52399.3	256	0
AC004076.9	ENSG00000268163_52400.4	29	0
AC004076.9	ENSG00000268163_52401.5	1110	0
AC004076.9	ENSG00000268163_52402.6	151	0
AC004076.9	ENSG00000268163_52403.7	299	0
AC004076.9	ENSG00000268163_52404.8	532	0
AC004076.9	ENSG00000268163_52405.9	216	0
AC004076.9	ENSG00000268163_52406.10	817	0
AC004381.6	ENSG00000005189_65076.1	212	0
AC004381.6	ENSG00000005189_65077.2	369	0
AC004381.6	ENSG00000005189_65078.3	120	0
AC004381.6	ENSG00000005189_65079.4	137	0
AC004381.6	ENSG00000005189_65080.5	197	0
AC004381.6	ENSG00000005189_65081.6	194	0
AC004381.6	ENSG00000005189_65082.7	241	0
AC004381.6	ENSG00000005189_65083.8	151	0
AC004381.6	ENSG00000005189_65084.9	56	0
AC004381.6	ENSG00000005189_65085.10	109	0
AC004466.1	ENSG00000268069_138566.1	251	0
AC004466.1	ENSG00000268069_138567.2	895	0
AC004466.1	ENSG00000268069_138568.3	210	0
AC004466.1	ENSG00000268069_138569.4	783	0
AC004466.1	ENSG00000268069_138570.5	50	0
AC004466.1	ENSG00000268069_138571.6	503	56
AC004466.1	ENSG00000268069_138572.7	235	0
AC004466.1	ENSG00000268069_138573.8	91	0
AC004466.1	ENSG00000268069_138574.9	579	18
AC004466.1	ENSG00000268069_138575.10	189	0
AC004528.1	ENSG00000269169_113430.1	0	0
AC004528.1	ENSG00000269169_113431.2	68	0
AC004528.1	ENSG00000269169_113432.3	62	0
AC004817.1	ENSG00000267901_155904.1	793	0
AC004817.1	ENSG00000267901_155905.2	597	48
AC004817.1	ENSG00000267901_155906.3	702	37
AC004817.1	ENSG00000267901_155907.4	861	0
AC004817.1	ENSG00000267901_155908.5	0	0
AC004817.1	ENSG00000267901_155909.6	441	0
AC004817.1	ENSG00000267901_155910.7	279	0
AC004817.1	ENSG00000267901_155911.8	644	0
AC004817.1	ENSG00000267901_155912.9	419	0
AC004817.1	ENSG00000267901_155913.10	107	48
AC004824.2	ENSG00000269468_184835.1	476	0
AC004824.2	ENSG00000269468_184836.2	736	0
AC004824.2	ENSG00000269468_184837.3	60	0
AC004824.2	ENSG00000269468_184838.4	253	0
AC004824.2	ENSG00000269468_184839.5	98	0
AC004824.2	ENSG00000269468_184840.6	32	0
AC004824.2	ENSG00000269468_184841.7	0	0
AC004824.2	ENSG00000269468_184842.8	58	0
AC004824.2	ENSG00000269468_184843.9	123	0
AC004824.2	ENSG00000269468_184844.10	139	0
AC004899.1	ENSG00000267970_69555.1	654	0
AC004899.1	ENSG00000267970_69556.2	430	0
AC004899.1	ENSG00000267970_69557.3	1629	0
AC004899.1	ENSG00000267970_69558.4	845	0
AC004899.1	ENSG00000267970_69559.5	619	0
AC004899.1	ENSG00000267970_69560.6	635	198
AC004899.1	ENSG00000267970_69561.7	959	0
AC004899.1	ENSG00000267970_69562.8	237	0
AC004899.1	ENSG00000267970_69563.9	3048	12
AC004899.1	ENSG00000267970_69564.10	757	12
AC005003.1	ENSG00000213888_183022.1	184	0
AC005003.1	ENSG00000213888_183023.2	1314	0
AC005003.1	ENSG00000213888_183024.3	508	0
AC005003.1	ENSG00000213888_183025.4	1788	0
AC005003.1	ENSG00000213888_183026.5	180	0
AC005003.1	ENSG00000213888_183027.6	431	0
AC005003.1	ENSG00000213888_183028.7	204	0
AC005003.1	ENSG00000213888_183029.8	674	0
AC005003.1	ENSG00000213888_183030.9	254	0
AC005003.1	ENSG00000213888_183031.10	966	0
AC005008.2	ENSG00000237896_52119.1	185	0
AC005008.2	ENSG00000237896_52120.2	128	0
AC005008.2	ENSG00000237896_52121.3	105	0
AC005008.2	ENSG00000237896_52122.4	32	0
AC005008.2	ENSG00000237896_52123.5	262	0
AC005008.2	ENSG00000237896_52124.6	200	0
AC005008.2	ENSG00000237896_52125.7	743	0
AC005008.2	ENSG00000237896_52126.8	93	0
AC005008.2	ENSG00000237896_52127.9	144	0
AC005008.2	ENSG00000237896_52128.10	184	0
AC005082.1	ENSG00000214871_201179.1	264	0
AC005082.1	ENSG00000214871_201180.2	10	0
AC005082.1	ENSG00000214871_201181.3	19	0
AC005082.1	ENSG00000214871_201182.4	0	0
AC005082.1	ENSG00000214871_201183.5	21	0
AC005082.1	ENSG00000214871_201184.6	0	0
AC005082.1	ENSG00000214871_201185.7	0	0
AC005082.1	ENSG00000214871_201186.8	230	0
AC005082.1	ENSG00000214871_201187.9	0	0
AC005082.1	ENSG00000214871_201188.10	130	0
AC005358.1	ENSG00000273452_120365.1	131	0
AC005358.1	ENSG00000273452_120366.2	678	0
AC005358.1	ENSG00000273452_120367.3	334	0
AC005358.1	ENSG00000273452_120368.4	234	0
AC005358.1	ENSG00000273452_120369.5	498	34
AC005358.1	ENSG00000273452_120370.6	661	0
AC005358.1	ENSG00000273452_120371.7	646	0
AC005358.1	ENSG00000273452_120372.8	449	0
AC005358.1	ENSG00000273452_120373.9	68	0
AC005358.1	ENSG00000273452_120374.10	70	0
AC005477.1	ENSG00000257040_143782.1	225	0
AC005477.1	ENSG00000257040_143783.2	337	24
AC005477.1	ENSG00000257040_143784.3	417	0
AC005477.1	ENSG00000257040_143785.4	139	0
AC005477.1	ENSG00000257040_143786.5	806	0
AC005477.1	ENSG00000257040_143787.6	100	0
AC005477.1	ENSG00000257040_143788.7	516	0
AC005477.1	ENSG00000257040_143789.8	339	0
AC005477.1	ENSG00000257040_143790.9	138	0
AC005477.1	ENSG00000257040_143791.10	374	0
AC005481.5	ENSG00000222012_33400.1	516	0
AC005481.5	ENSG00000222012_33401.2	115	0
AC005481.5	ENSG00000222012_33402.3	242	0
AC005481.5	ENSG00000222012_33403.4	278	0
AC005481.5	ENSG00000222012_33404.5	189	0
AC005481.5	ENSG00000222012_33405.6	523	0
AC005481.5	ENSG00000222012_33406.7	432	0
AC005481.5	ENSG00000222012_33407.8	126	0
AC005481.5	ENSG00000222012_33408.9	1189	0
AC005481.5	ENSG00000222012_33409.10	402	0
AC005488.1	ENSG00000267985_120944.1	0	0
AC005493.1	ENSG00000214841_203510.1	264	0
AC005544.1	ENSG00000214167_125372.1	274	0
AC005544.1	ENSG00000214167_125373.2	384	0
AC005544.1	ENSG00000214167_125374.3	900	0
AC005544.1	ENSG00000214167_125375.4	206	0
AC005544.1	ENSG00000214167_125376.5	278	0
AC005544.1	ENSG00000214167_125377.6	985	0
AC005544.1	ENSG00000214167_125378.7	153	0
AC005544.1	ENSG00000214167_125379.8	109	10
AC005544.1	ENSG00000214167_125380.9	473	0
AC005544.1	ENSG00000214167_125381.10	978	0
AC005549.3	ENSG00000268024_189415.1	850	0
AC005549.3	ENSG00000268024_189416.2	206	0
AC005606.1	ENSG00000269205_185125.1	330	0
AC005606.1	ENSG00000269205_185126.2	74	0
AC005606.1	ENSG00000269205_185127.3	79	0
AC005606.1	ENSG00000269205_185128.4	465	0
AC005606.1	ENSG00000269205_185129.5	231	0
AC005606.1	ENSG00000269205_185130.6	151	0
AC005606.1	ENSG00000269205_185131.7	106	0
AC005606.1	ENSG00000269205_185132.8	164	0
AC005609.1	ENSG00000249034_86631.1	1130	0
AC005609.1	ENSG00000249034_86632.2	603	179
AC005609.1	ENSG00000249034_86633.3	314	0
AC005609.1	ENSG00000249034_86634.4	231	0
AC005609.1	ENSG00000249034_86635.5	619	0
AC005609.1	ENSG00000249034_86636.6	595	0
AC005609.1	ENSG00000249034_86637.7	770	18
AC005609.1	ENSG00000249034_86638.8	465	0
AC005609.1	ENSG00000249034_86639.9	515	0
AC005609.1	ENSG00000249034_86640.10	919	0
AC005779.2	ENSG00000267545_80480.1	585	0
AC005779.2	ENSG00000267545_80481.2	1726	0
AC005779.2	ENSG00000267545_80482.3	1726	0
AC005779.2	ENSG00000267545_80483.4	715	0
AC005779.2	ENSG00000267545_80484.5	1947	0
AC005779.2	ENSG00000267545_80485.6	978	0
AC005779.2	ENSG00000267545_80486.7	42	0
AC005779.2	ENSG00000267545_80487.8	1169	0
AC005779.2	ENSG00000267545_80488.9	775	0
AC005779.2	ENSG00000267545_80489.10	996	0
AC005841.1	ENSG00000206044_99915.1	137	0
AC005841.1	ENSG00000206044_99916.2	125	0
AC005841.1	ENSG00000206044_99917.3	511	9
AC005841.1	ENSG00000206044_99918.4	422	0
AC005841.1	ENSG00000206044_99919.5	448	0
AC005841.1	ENSG00000206044_99920.6	497	0
AC005841.1	ENSG00000206044_99921.7	323	0
AC005841.1	ENSG00000206044_99922.8	1073	0
AC005841.1	ENSG00000206044_99923.9	135	0
AC005841.1	ENSG00000206044_99924.10	118	0
AC006014.1	ENSG00000268891_54418.1	0	0
AC006116.20	ENSG00000267710_198696.1	193	0
AC006116.20	ENSG00000267710_198697.2	51	0
AC006116.20	ENSG00000267710_198698.3	681	117
AC006116.20	ENSG00000267710_198699.4	48	0
AC006116.20	ENSG00000267710_198700.5	194	0
AC006116.20	ENSG00000267710_198701.6	194	0
AC006116.20	ENSG00000267710_198702.7	324	0
AC006116.20	ENSG00000267710_198703.8	493	0
AC006116.20	ENSG00000267710_198704.9	72	0
AC006116.20	ENSG00000267710_198705.10	521	0
AC006126.3	ENSG00000266958_126832.1	234	0
AC006126.3	ENSG00000266958_126833.2	150	0
AC006126.3	ENSG00000266958_126834.3	369	0
AC006126.3	ENSG00000266958_126835.4	0	0
AC006126.3	ENSG00000266958_126836.5	1484	0
AC006126.3	ENSG00000266958_126837.6	37	0
AC006126.3	ENSG00000266958_126838.7	1137	0
AC006126.3	ENSG00000266958_126839.8	498	1
AC006126.3	ENSG00000266958_126840.9	276	0
AC006126.3	ENSG00000266958_126841.10	638	0
AC006156.1	ENSG00000225516_201479.1	663	0
AC006156.1	ENSG00000225516_201480.2	696	54
AC006156.1	ENSG00000225516_201481.3	243	0
AC006156.1	ENSG00000225516_201482.4	641	0
AC006156.1	ENSG00000225516_201483.5	1796	29
AC006156.1	ENSG00000225516_201484.6	510	0
AC006156.1	ENSG00000225516_201485.7	510	0
AC006156.1	ENSG00000225516_201486.8	343	47
AC006156.1	ENSG00000225516_201487.9	924	0
AC006156.1	ENSG00000225516_201488.10	204	0
AC006372.1	ENSG00000236669_142094.1	542	231
AC006372.1	ENSG00000236669_142095.2	464	0
AC006372.1	ENSG00000236669_142096.3	83	0
AC006372.1	ENSG00000236669_142097.4	235	0
AC006372.1	ENSG00000236669_142098.5	429	0
AC006372.1	ENSG00000236669_142099.6	666	0
AC006372.1	ENSG00000236669_142100.7	227	0
AC006372.1	ENSG00000236669_142101.8	592	0
AC006372.1	ENSG00000236669_142102.9	703	0
AC006372.1	ENSG00000236669_142103.10	358	0
AC006435.1	ENSG00000205821_167789.1	405	0
AC006435.1	ENSG00000205821_167790.2	108	0
AC006435.1	ENSG00000205821_167791.3	419	0
AC006435.1	ENSG00000205821_167792.4	232	0
AC006435.1	ENSG00000205821_167793.5	453	0
AC006435.1	ENSG00000205821_167794.6	151	0
AC006435.1	ENSG00000205821_167795.7	587	0
AC006435.1	ENSG00000205821_167796.8	170	0
AC006435.1	ENSG00000205821_167797.9	1686	0
AC006435.1	ENSG00000205821_167798.10	1496	0
AC006449.1	ENSG00000269094_150621.1	1449	2366
AC006449.1	ENSG00000269094_150622.2	308	0
AC006449.1	ENSG00000269094_150623.3	353	0
AC006449.1	ENSG00000269094_150624.4	30	0
AC006449.1	ENSG00000269094_150625.5	104	0
AC006449.1	ENSG00000269094_150626.6	137	0
AC006449.1	ENSG00000269094_150627.7	330	0
AC006449.1	ENSG00000269094_150628.8	611	0
AC006449.1	ENSG00000269094_150629.9	210	0
AC006449.1	ENSG00000269094_150630.10	190	0
AC006455.1	ENSG00000230000_161920.1	183	0
AC006455.1	ENSG00000230000_161921.2	106	0
AC006455.1	ENSG00000230000_161922.3	1065	0
AC006455.1	ENSG00000230000_161923.4	235	0
AC006455.1	ENSG00000230000_161924.5	771	0
AC006455.1	ENSG00000230000_161925.6	424	0
AC006455.1	ENSG00000230000_161926.7	672	0
AC006455.1	ENSG00000230000_161927.8	509	0
AC006455.1	ENSG00000230000_161928.9	308	0
AC006455.1	ENSG00000230000_161929.10	493	0
AC006486.1	ENSG00000204957_116643.1	262	0
AC006486.1	ENSG00000204957_116644.2	200	0
AC006486.1	ENSG00000204957_116645.3	238	0
AC006486.1	ENSG00000204957_116646.4	326	0
AC006486.1	ENSG00000204957_116647.5	182	0
AC006486.1	ENSG00000204957_116648.6	562	0
AC006486.1	ENSG00000204957_116649.7	193	47
AC006486.1	ENSG00000204957_116650.8	441	0
AC006486.1	ENSG00000204957_116651.9	981	1
AC006486.1	ENSG00000204957_116652.10	224	0
AC006486.9	ENSG00000268643_79704.1	367	0
AC006486.9	ENSG00000268643_79705.2	65	0
AC006486.9	ENSG00000268643_79706.3	383	0
AC006486.9	ENSG00000268643_79707.4	328	0
AC006486.9	ENSG00000268643_79708.5	120	0
AC006486.9	ENSG00000268643_79709.6	320	0
AC006486.9	ENSG00000268643_79710.7	343	0
AC006486.9	ENSG00000268643_79711.8	1172	0
AC006486.9	ENSG00000268643_79712.9	330	0
AC006486.9	ENSG00000268643_79713.10	695	0
AC006538.4	ENSG00000267001_144528.1	378	0
AC006538.4	ENSG00000267001_144529.2	389	69
AC006538.4	ENSG00000267001_144530.3	499	0
AC006538.4	ENSG00000267001_144531.4	980	0
AC006538.4	ENSG00000267001_144532.5	1267	34
AC006538.4	ENSG00000267001_144533.6	551	15
AC006538.4	ENSG00000267001_144534.7	601	0
AC006538.4	ENSG00000267001_144535.8	301	0
AC006538.4	ENSG00000267001_144536.9	631	0
AC006538.4	ENSG00000267001_144537.10	745	0
AC006547.14	ENSG00000234409_189239.1	723	0
AC006547.14	ENSG00000234409_189240.2	148	0
AC006547.14	ENSG00000234409_189241.3	1051	0
AC006547.14	ENSG00000234409_189242.4	153	0
AC006547.14	ENSG00000234409_189243.5	593	0
AC006547.14	ENSG00000234409_189244.6	58	0
AC006547.14	ENSG00000234409_189245.7	735	0
AC006547.14	ENSG00000234409_189246.8	665	0
AC006547.14	ENSG00000234409_189247.9	253	0
AC006547.14	ENSG00000234409_189248.10	1372	0
AC006946.15	ENSG00000235478_27085.1	680	0
AC006946.15	ENSG00000235478_27086.2	332	0
AC006946.15	ENSG00000235478_27087.3	399	0
AC006946.15	ENSG00000235478_27088.4	973	0
AC006946.15	ENSG00000235478_27089.5	415	2
AC006946.15	ENSG00000235478_27090.6	282	0
AC006946.15	ENSG00000235478_27091.7	108	0
AC006946.15	ENSG00000235478_27092.8	520	0
AC006946.15	ENSG00000235478_27093.9	508	0
AC006946.15	ENSG00000235478_27094.10	0	0
AC006967.1	ENSG00000269446_192177.1	634	0
AC006967.1	ENSG00000269446_192178.2	541	23
AC006967.1	ENSG00000269446_192179.3	392	0
AC006967.1	ENSG00000269446_192180.4	573	0
AC006967.1	ENSG00000269446_192181.5	1419	79
AC006967.1	ENSG00000269446_192182.6	463	0
AC006967.1	ENSG00000269446_192183.7	1038	0
AC006967.1	ENSG00000269446_192184.8	0	0
AC006967.1	ENSG00000269446_192185.9	70	0
AC006967.1	ENSG00000269446_192186.10	29	0
AC007040.11	ENSG00000258881_119343.1	289	0
AC007040.11	ENSG00000258881_119344.2	451	0
AC007040.11	ENSG00000258881_119345.3	419	0
AC007040.11	ENSG00000258881_119346.4	205	0
AC007040.11	ENSG00000258881_119347.5	313	57
AC007040.11	ENSG00000258881_119348.6	244	0
AC007040.11	ENSG00000258881_119349.7	36	0
AC007040.11	ENSG00000258881_119350.8	452	1
AC007040.11	ENSG00000258881_119351.9	91	4
AC007040.11	ENSG00000258881_119352.10	87	0
AC007204.1	ENSG00000268461_93497.1	99	0
AC007204.1	ENSG00000268461_93498.2	99	0
AC007204.1	ENSG00000268461_93499.3	568	0
AC007204.1	ENSG00000268461_93500.4	1238	0
AC007204.1	ENSG00000268461_93501.5	286	0
AC007204.1	ENSG00000268461_93502.6	0	0
AC007204.1	ENSG00000268461_93503.7	17	0
AC007204.1	ENSG00000268461_93504.8	16	0
AC007204.1	ENSG00000268461_93505.9	61	0
AC007204.1	ENSG00000268461_93506.10	109	0
AC007216.2	ENSG00000269121_127700.1	63	0
AC007216.2	ENSG00000269121_127701.2	17	0
AC007216.2	ENSG00000269121_127702.3	183	0
AC007216.2	ENSG00000269121_127703.4	7	0
AC007216.2	ENSG00000269121_127704.5	44	0
AC007216.2	ENSG00000269121_127705.6	0	0
AC007216.2	ENSG00000269121_127706.7	0	0
AC007216.2	ENSG00000269121_127707.8	0	0
AC007216.2	ENSG00000269121_127708.9	0	0
AC007216.2	ENSG00000269121_127709.10	35	0
AC007375.1	ENSG00000269883_45891.1	500	0
AC007375.1	ENSG00000269883_45892.2	1127	0
AC007375.1	ENSG00000269883_45893.3	1105	0
AC007375.1	ENSG00000269883_45894.4	734	0
AC007375.1	ENSG00000269883_45895.5	1186	0
AC007375.1	ENSG00000269883_45896.6	304	0
AC007375.1	ENSG00000269883_45897.7	1050	0
AC007375.1	ENSG00000269883_45898.8	640	0
AC007375.1	ENSG00000269883_45899.9	619	0
AC007375.1	ENSG00000269883_45900.10	882	0
AC007382.1	ENSG00000268688_122839.1	130	0
AC007382.1	ENSG00000268688_122840.2	335	0
AC007382.1	ENSG00000268688_122841.3	122	0
AC007382.1	ENSG00000268688_122842.4	80	0
AC007382.1	ENSG00000268688_122843.5	646	0
AC007382.1	ENSG00000268688_122844.6	528	0
AC007401.2	ENSG00000217075_90764.1	396	0
AC007401.2	ENSG00000217075_90765.2	235	0
AC007401.2	ENSG00000217075_90766.3	350	0
AC007401.2	ENSG00000217075_90767.4	297	0
AC007401.2	ENSG00000217075_90768.5	544	0
AC007401.2	ENSG00000217075_90769.6	833	0
AC007401.2	ENSG00000217075_90770.7	43	0
AC007401.2	ENSG00000217075_90771.8	143	0
AC007401.2	ENSG00000217075_90772.9	844	0
AC007401.2	ENSG00000217075_90773.10	726	0
AC007461.1	ENSG00000267893_22941.1	328	0
AC007461.1	ENSG00000267893_22942.2	461	0
AC007461.1	ENSG00000267893_22943.3	39	0
AC007461.1	ENSG00000267893_22944.4	556	0
AC007461.1	ENSG00000267893_22945.5	1069	44
AC007461.1	ENSG00000267893_22946.6	2311	57
AC007461.1	ENSG00000267893_22947.7	1158	57
AC007461.1	ENSG00000267893_22948.8	516	0
AC007461.1	ENSG00000267893_22949.9	432	0
AC007461.1	ENSG00000267893_22950.10	467	0
AC007557.1	ENSG00000223874_69245.1	314	0
AC007557.1	ENSG00000223874_69246.2	241	0
AC007557.1	ENSG00000223874_69247.3	138	0
AC007557.1	ENSG00000223874_69248.4	345	0
AC007557.1	ENSG00000223874_69249.5	541	0
AC007557.1	ENSG00000223874_69250.6	565	0
AC007557.1	ENSG00000223874_69251.7	57	0
AC007557.1	ENSG00000223874_69252.8	53	0
AC007557.1	ENSG00000223874_69253.9	788	20
AC007557.1	ENSG00000223874_69254.10	1522	0
AC007773.3	ENSG00000269093_150641.1	1032	0
AC007773.3	ENSG00000269093_150642.2	321	0
AC007919.2	ENSG00000269496_77472.1	33	0
AC007919.2	ENSG00000269496_77473.2	664	0
AC007919.2	ENSG00000269496_77474.3	289	0
AC007919.2	ENSG00000269496_77475.4	126	0
AC007919.2	ENSG00000269496_77476.5	644	63
AC007919.2	ENSG00000269496_77477.6	449	0
AC007919.2	ENSG00000269496_77478.7	217	0
AC007919.2	ENSG00000269496_77479.8	532	67
AC007919.2	ENSG00000269496_77480.9	276	0
AC007919.2	ENSG00000269496_77481.10	198	0
AC007952.1	ENSG00000214844_2159.1	917	0
AC007952.1	ENSG00000214844_2160.2	764	0
AC007952.1	ENSG00000214844_2161.3	442	0
AC007952.1	ENSG00000214844_2162.4	747	0
AC007952.1	ENSG00000214844_2163.5	163	0
AC007952.1	ENSG00000214844_2164.6	337	0
AC007952.1	ENSG00000214844_2165.7	332	0
AC007952.5	ENSG00000228157_110637.1	387	0
AC007952.5	ENSG00000228157_110638.2	119	0
AC007952.5	ENSG00000228157_110639.3	1342	0
AC007952.5	ENSG00000228157_110640.4	188	0
AC007952.5	ENSG00000228157_110641.5	46	0
AC007952.5	ENSG00000228157_110642.6	368	0
AC007952.5	ENSG00000228157_110643.7	962	237
AC007952.5	ENSG00000228157_110644.8	212	20
AC007952.5	ENSG00000228157_110645.9	40	23
AC007952.5	ENSG00000228157_110646.10	149	0
AC007952.6	ENSG00000197665_73833.1	572	0
AC007952.6	ENSG00000197665_73834.2	244	0
AC007952.6	ENSG00000197665_73835.3	172	0
AC007952.6	ENSG00000197665_73836.4	154	0
AC007952.6	ENSG00000197665_73837.5	37	0
AC007952.6	ENSG00000197665_73838.6	1340	0
AC007952.6	ENSG00000197665_73839.7	414	0
AC007952.6	ENSG00000197665_73840.8	467	0
AC007952.6	ENSG00000197665_73841.9	234	0
AC007952.6	ENSG00000197665_73842.10	37	26
AC007956.1	ENSG00000214670_83246.1	1215	0
AC007956.1	ENSG00000214670_83247.2	574	38
AC007956.1	ENSG00000214670_83248.3	406	0
AC007956.1	ENSG00000214670_83249.4	999	0
AC007956.1	ENSG00000214670_83250.5	36	0
AC007956.1	ENSG00000214670_83251.6	762	0
AC007956.1	ENSG00000214670_83252.7	994	0
AC007956.1	ENSG00000214670_83253.8	127	0
AC007956.1	ENSG00000214670_83254.9	1122	0
AC007956.1	ENSG00000214670_83255.10	918	0
AC007965.1	ENSG00000269393_154546.1	0	0
AC007965.1	ENSG00000269393_154547.2	390	0
AC008060.7	ENSG00000218672_73213.1	559	0
AC008060.7	ENSG00000218672_73214.2	0	0
AC008060.7	ENSG00000218672_73215.3	650	0
AC008060.7	ENSG00000218672_73216.4	474	0
AC008060.7	ENSG00000218672_73217.5	200	0
AC008060.7	ENSG00000218672_73218.6	79	0
AC008060.7	ENSG00000218672_73219.7	1385	0
AC008060.7	ENSG00000218672_73220.8	25	0
AC008060.7	ENSG00000218672_73221.9	234	19
AC008060.7	ENSG00000218672_73222.10	861	0
AC008132.1	ENSG00000182824_109880.1	580	0
AC008132.1	ENSG00000182824_109881.2	234	0
AC008132.1	ENSG00000182824_109882.3	43	0
AC008132.1	ENSG00000182824_109883.4	27	0
AC008132.1	ENSG00000182824_109884.5	142	0
AC008132.1	ENSG00000182824_109885.6	186	0
AC008132.1	ENSG00000182824_109886.7	327	0
AC008132.1	ENSG00000182824_109887.8	27	0
AC008132.1	ENSG00000182824_109888.9	131	0
AC008132.1	ENSG00000182824_109889.10	50	0
AC008132.13	ENSG00000161103_150451.1	540	0
AC008132.13	ENSG00000161103_150452.2	422	0
AC008132.13	ENSG00000161103_150453.3	110	0
AC008132.13	ENSG00000161103_150454.4	206	0
AC008132.13	ENSG00000161103_150455.5	145	0
AC008132.13	ENSG00000161103_150456.6	309	0
AC008132.13	ENSG00000161103_150457.7	683	0
AC008132.13	ENSG00000161103_150458.8	475	0
AC008132.13	ENSG00000161103_150459.9	107	0
AC008132.13	ENSG00000161103_150460.10	526	42
AC008267.1	ENSG00000267941_83542.1	665	0
AC008267.1	ENSG00000267941_83543.2	617	0
AC008267.1	ENSG00000267941_83544.3	2167	33
AC008267.1	ENSG00000267941_83545.4	384	0
AC008267.1	ENSG00000267941_83546.5	1136	0
AC008267.1	ENSG00000267941_83547.6	1373	0
AC008267.1	ENSG00000267941_83548.7	455	31
AC008267.1	ENSG00000267941_83549.8	1151	0
AC008267.1	ENSG00000267941_83550.9	1671	0
AC008267.1	ENSG00000267941_83551.10	667	0
AC008271.1	ENSG00000231031_173439.1	809	0
AC008271.1	ENSG00000231031_173440.2	88	0
AC008271.1	ENSG00000231031_173441.3	92	0
AC008271.1	ENSG00000231031_173442.4	147	0
AC008271.1	ENSG00000231031_173443.5	442	0
AC008271.1	ENSG00000231031_173444.6	302	0
AC008271.1	ENSG00000231031_173445.7	594	0
AC008271.1	ENSG00000231031_173446.8	302	0
AC008271.1	ENSG00000231031_173447.9	667	0
AC008271.1	ENSG00000231031_173448.10	210	0
AC008394.1	ENSG00000233828_66425.1	692	0
AC008394.1	ENSG00000233828_66426.2	281	0
AC008394.1	ENSG00000233828_66427.3	105	0
AC008394.1	ENSG00000233828_66428.4	213	0
AC008394.1	ENSG00000233828_66429.5	197	0
AC008394.1	ENSG00000233828_66430.6	1280	0
AC008394.1	ENSG00000233828_66431.7	107	0
AC008394.1	ENSG00000233828_66432.8	1280	0
AC008394.1	ENSG00000233828_66433.9	129	0
AC008394.1	ENSG00000233828_66434.10	118	0
AC008443.1	ENSG00000268397_50795.1	338	0
AC008443.1	ENSG00000268397_50796.2	121	0
AC008443.1	ENSG00000268397_50797.3	193	0
AC008443.1	ENSG00000268397_50798.4	37	0
AC008443.1	ENSG00000268397_50799.5	290	0
AC008443.1	ENSG00000268397_50800.6	636	0
AC008443.1	ENSG00000268397_50801.7	316	0
AC008443.1	ENSG00000268397_50802.8	113	0
AC008443.1	ENSG00000268397_50803.9	210	0
AC008443.1	ENSG00000268397_50804.10	309	0
AC008498.1	ENSG00000269267_177834.1	173	0
AC008498.1	ENSG00000269267_177835.2	188	0
AC008498.1	ENSG00000269267_177836.3	97	0
AC008498.1	ENSG00000269267_177837.4	272	0
AC008498.1	ENSG00000269267_177838.5	41	0
AC008498.1	ENSG00000269267_177839.6	88	0
AC008498.1	ENSG00000269267_177840.7	19	0
AC008686.1	ENSG00000214109_28623.1	98	0
AC008686.1	ENSG00000214109_28624.2	620	0
AC008686.1	ENSG00000214109_28625.3	0	0
AC008686.1	ENSG00000214109_28626.4	506	0
AC008686.1	ENSG00000214109_28627.5	55	0
AC008686.1	ENSG00000214109_28628.6	25	0
AC008686.1	ENSG00000214109_28629.7	4	0
AC008686.1	ENSG00000214109_28630.8	57	0
AC008686.1	ENSG00000214109_28631.9	313	0
AC008686.1	ENSG00000214109_28632.10	15	0
AC008948.1	ENSG00000268424_107694.1	208	0
AC008948.1	ENSG00000268424_107695.2	113	0
AC008948.1	ENSG00000268424_107696.3	114	0
AC008948.1	ENSG00000268424_107697.4	403	0
AC008948.1	ENSG00000268424_107698.5	443	0
AC008948.1	ENSG00000268424_107699.6	207	0
AC008948.1	ENSG00000268424_107700.7	38	0
AC008948.1	ENSG00000268424_107701.8	673	0
AC008948.1	ENSG00000268424_107702.9	223	0
AC008948.1	ENSG00000268424_107703.10	176	0
AC008964.1	ENSG00000269215_116833.1	805	0
AC008964.1	ENSG00000269215_116834.2	38	0
AC008964.1	ENSG00000269215_116835.3	123	0
AC008964.1	ENSG00000269215_116836.4	78	0
AC008964.1	ENSG00000269215_116837.5	284	0
AC008964.1	ENSG00000269215_116838.6	263	0
AC009060.1	ENSG00000269746_23756.1	1503	0
AC009060.1	ENSG00000269746_23757.2	428	0
AC009060.1	ENSG00000269746_23758.3	958	0
AC009060.1	ENSG00000269746_23759.4	522	0
AC009060.1	ENSG00000269746_23760.5	11	0
AC009060.1	ENSG00000269746_23761.6	28	0
AC009060.1	ENSG00000269746_23762.7	11	0
AC009060.1	ENSG00000269746_23763.8	33	0
AC009060.1	ENSG00000269746_23764.9	41	0
AC009060.1	ENSG00000269746_23765.10	0	0
AC009065.1	ENSG00000167970_90085.1	236	0
AC009065.1	ENSG00000167970_90086.2	14	0
AC009065.1	ENSG00000167970_90087.3	147	0
AC009065.1	ENSG00000167970_90088.4	260	0
AC009065.1	ENSG00000167970_90089.5	515	0
AC009065.1	ENSG00000167970_90090.6	202	0
AC009065.1	ENSG00000167970_90091.7	797	0
AC009065.1	ENSG00000167970_90092.8	0	0
AC009065.1	ENSG00000167970_90093.9	166	0
AC009065.1	ENSG00000167970_90094.10	400	0
AC009365.3	ENSG00000183470_109970.1	489	0
AC009365.3	ENSG00000183470_109971.2	178	0
AC009365.3	ENSG00000183470_109972.3	329	0
AC009365.3	ENSG00000183470_109973.4	71	0
AC009365.3	ENSG00000183470_109974.5	26	0
AC009365.3	ENSG00000183470_109975.6	338	0
AC009365.3	ENSG00000183470_109976.7	86	0
AC009365.3	ENSG00000183470_109977.8	152	0
AC009365.3	ENSG00000183470_109978.9	64	0
AC009365.3	ENSG00000183470_109979.10	74	0
AC009403.2	ENSG00000216895_61615.1	155	0
AC009403.2	ENSG00000216895_61616.2	744	0
AC009403.2	ENSG00000216895_61617.3	195	0
AC009403.2	ENSG00000216895_61618.4	750	0
AC009403.2	ENSG00000216895_61619.5	330	0
AC009403.2	ENSG00000216895_61620.6	70	0
AC009403.2	ENSG00000216895_61621.7	60	0
AC009403.2	ENSG00000216895_61622.8	1305	0
AC009403.2	ENSG00000216895_61623.9	788	0
AC009403.2	ENSG00000216895_61624.10	295	0
AC009802.1	ENSG00000268706_47900.1	285	0
AC009802.1	ENSG00000268706_47901.2	0	0
AC009892.10	ENSG00000224730_24050.1	39	0
AC009892.10	ENSG00000224730_24051.2	489	0
AC009892.10	ENSG00000224730_24052.3	613	0
AC009892.10	ENSG00000224730_24053.4	257	0
AC009892.10	ENSG00000224730_24054.5	130	0
AC009892.10	ENSG00000224730_24055.6	1090	0
AC009892.10	ENSG00000224730_24056.7	484	0
AC009892.10	ENSG00000224730_24057.8	869	0
AC009892.10	ENSG00000224730_24058.9	80	0
AC009892.10	ENSG00000224730_24059.10	142	0
AC009977.1	ENSG00000269084_45571.1	134	0
AC009977.1	ENSG00000269084_45572.2	121	0
AC009977.1	ENSG00000269084_45573.3	0	0
AC009977.1	ENSG00000269084_45574.4	19	0
AC009977.1	ENSG00000269084_45575.5	19	0
AC009977.1	ENSG00000269084_45576.6	59	0
AC010327.2	ENSG00000269808_17880.1	63	0
AC010327.2	ENSG00000269808_17881.2	154	0
AC010327.2	ENSG00000269808_17882.3	453	0
AC010327.2	ENSG00000269808_17883.4	879	0
AC010327.2	ENSG00000269808_17884.5	581	0
AC010327.2	ENSG00000269808_17885.6	631	0
AC010327.2	ENSG00000269808_17886.7	718	0
AC010327.2	ENSG00000269808_17887.8	839	0
AC010327.2	ENSG00000269808_17888.9	215	0
AC010327.2	ENSG00000269808_17889.10	1289	0
AC010336.1	ENSG00000214248_83435.1	457	0
AC010336.1	ENSG00000214248_83436.2	1641	130
AC010336.1	ENSG00000214248_83437.3	206	0
AC010336.1	ENSG00000214248_83438.4	154	0
AC010336.1	ENSG00000214248_83439.5	1036	113
AC010336.1	ENSG00000214248_83440.6	427	0
AC010336.1	ENSG00000214248_83441.7	1027	0
AC010336.1	ENSG00000214248_83442.8	1435	10
AC010336.1	ENSG00000214248_83443.9	183	0
AC010336.1	ENSG00000214248_83444.10	548	0
AC010441.1	ENSG00000269636_20567.1	1300	0
AC010441.1	ENSG00000269636_20568.2	751	0
AC010441.1	ENSG00000269636_20569.3	844	0
AC010441.1	ENSG00000269636_20570.4	738	0
AC010441.1	ENSG00000269636_20571.5	281	0
AC010441.1	ENSG00000269636_20572.6	454	0
AC010441.1	ENSG00000269636_20573.7	448	0
AC010441.1	ENSG00000269636_20574.8	102	34
AC010441.1	ENSG00000269636_20575.9	178	0
AC010441.1	ENSG00000269636_20576.10	634	0
AC010536.1	ENSG00000226180_175309.1	248	0
AC010536.1	ENSG00000226180_175310.2	584	0
AC010536.1	ENSG00000226180_175311.3	496	0
AC010536.1	ENSG00000226180_175312.4	873	0
AC010536.1	ENSG00000226180_175313.5	260	0
AC010536.1	ENSG00000226180_175314.6	157	0
AC010536.1	ENSG00000226180_175315.7	67	0
AC010536.1	ENSG00000226180_175316.8	217	0
AC010536.1	ENSG00000226180_175317.9	592	0
AC010536.1	ENSG00000226180_175318.10	671	0
AC010547.9	ENSG00000261611_103517.1	498	0
AC010547.9	ENSG00000261611_103518.2	435	0
AC010547.9	ENSG00000261611_103519.3	1420	0
AC010547.9	ENSG00000261611_103520.4	250	0
AC010547.9	ENSG00000261611_103521.5	866	110
AC010547.9	ENSG00000261611_103522.6	618	0
AC010547.9	ENSG00000261611_103523.7	173	0
AC010547.9	ENSG00000261611_103524.8	301	0
AC010547.9	ENSG00000261611_103525.9	333	0
AC010547.9	ENSG00000261611_103526.10	125	0
AC010642.1	ENSG00000267216_140032.1	542	10
AC010642.1	ENSG00000267216_140033.2	404	0
AC010642.1	ENSG00000267216_140034.3	1140	0
AC010642.1	ENSG00000267216_140035.4	307	0
AC010642.1	ENSG00000267216_140036.5	532	0
AC010642.1	ENSG00000267216_140037.6	821	0
AC010642.1	ENSG00000267216_140038.7	640	0
AC010642.1	ENSG00000267216_140039.8	1121	0
AC010642.1	ENSG00000267216_140040.9	171	12
AC010642.1	ENSG00000267216_140041.10	334	0
AC010646.3	ENSG00000269095_201109.1	2298	0
AC010646.3	ENSG00000269095_201110.2	868	0
AC010646.3	ENSG00000269095_201111.3	696	0
AC010646.3	ENSG00000269095_201112.4	552	0
AC010646.3	ENSG00000269095_201113.5	651	0
AC010646.3	ENSG00000269095_201114.6	716	0
AC010646.3	ENSG00000269095_201115.7	1174	0
AC010646.3	ENSG00000269095_201116.8	397	0
AC010646.3	ENSG00000269095_201117.9	868	0
AC010646.3	ENSG00000269095_201118.10	1079	0
AC010877.1	ENSG00000269291_113820.1	547	0
AC010877.1	ENSG00000269291_113821.2	375	0
AC010877.1	ENSG00000269291_113822.3	234	0
AC010877.1	ENSG00000269291_113823.4	215	0
AC010877.1	ENSG00000269291_113824.5	510	0
AC010877.1	ENSG00000269291_113825.6	19	0
AC010877.1	ENSG00000269291_113826.7	91	0
AC010877.1	ENSG00000269291_113827.8	192	0
AC010877.1	ENSG00000269291_113828.9	80	0
AC010877.1	ENSG00000269291_113829.10	0	0
AC011239.1	ENSG00000224361_14322.1	402	90
AC011239.1	ENSG00000224361_14323.2	1161	0
AC011239.1	ENSG00000224361_14324.3	324	0
AC011239.1	ENSG00000224361_14325.4	129	0
AC011239.1	ENSG00000224361_14326.5	616	0
AC011239.1	ENSG00000224361_14327.6	289	49
AC011239.1	ENSG00000224361_14328.7	529	0
AC011239.1	ENSG00000224361_14329.8	368	0
AC011239.1	ENSG00000224361_14330.9	403	0
AC011239.1	ENSG00000224361_14331.10	313	0
AC011294.3	ENSG00000233539_191528.1	0	0
AC011294.3	ENSG00000233539_191529.2	225	0
AC011294.3	ENSG00000233539_191530.3	138	0
AC011294.3	ENSG00000233539_191531.4	292	0
AC011294.3	ENSG00000233539_191532.5	0	0
AC011298.1	ENSG00000268822_77533.1	237	0
AC011298.1	ENSG00000268822_77534.2	260	0
AC011298.1	ENSG00000268822_77535.3	235	0
AC011298.1	ENSG00000268822_77536.4	630	0
AC011298.1	ENSG00000268822_77537.5	254	0
AC011298.1	ENSG00000268822_77538.6	848	0
AC011298.1	ENSG00000268822_77539.7	1524	0
AC011298.1	ENSG00000268822_77540.8	257	0
AC011298.1	ENSG00000268822_77541.9	136	0
AC011298.1	ENSG00000268822_77542.10	562	0
AC011366.3	ENSG00000254106_79894.1	467	0
AC011366.3	ENSG00000254106_79895.2	332	0
AC011366.3	ENSG00000254106_79896.3	358	0
AC011366.3	ENSG00000254106_79897.4	2068	0
AC011366.3	ENSG00000254106_79898.5	1759	0
AC011366.3	ENSG00000254106_79899.6	183	0
AC011475.1	ENSG00000226104_667.1	23	0
AC011475.1	ENSG00000226104_668.2	0	0
AC011484.1	ENSG00000204850_70803.1	470	12
AC011484.1	ENSG00000204850_70804.2	538	0
AC011484.1	ENSG00000204850_70805.3	753	0
AC011484.1	ENSG00000204850_70806.4	664	0
AC011484.1	ENSG00000204850_70807.5	581	0
AC011484.1	ENSG00000204850_70808.6	903	0
AC011484.1	ENSG00000204850_70809.7	403	0
AC011484.1	ENSG00000204850_70810.8	809	0
AC011484.1	ENSG00000204850_70811.9	448	0
AC011484.1	ENSG00000204850_70812.10	663	0
AC011500.1	ENSG00000213922_80380.1	726	0
[truncated: 216,050+ more rows]

## Sheet: sgRNA counts targeted
Gene ID	sgRNA	Library counts	Sort counts
AAGAB	ENSG00000103591_185243.1	3609	1141
AAGAB	ENSG00000103591_185244.2	435	170
AAGAB	ENSG00000103591_185245.3	557	314
AAGAB	ENSG00000103591_185246.4	443	211
AAGAB	ENSG00000103591_185247.5	365	32
AAGAB	ENSG00000103591_185248.6	641	35
AAGAB	ENSG00000103591_185249.7	156	134
AAGAB	ENSG00000103591_185250.8	1967	590
AAGAB	ENSG00000103591_185251.9.V	528	631
AAGAB	ENSG00000103591_185252.10.V	372	497
AANAT	ENSG00000129673_87321.1	1916	562
AANAT	ENSG00000129673_87322.2	634	128
AANAT	ENSG00000129673_87323.3	336	372
AANAT	ENSG00000129673_87324.4	280	423
AANAT	ENSG00000129673_87325.5	2160	430
AANAT	ENSG00000129673_87326.6	2037	259
AANAT	ENSG00000129673_87327.7	1609	416
AANAT	ENSG00000129673_87328.8	804	169
AANAT	ENSG00000129673_87329.9	752	136
AANAT	ENSG00000129673_87330.10	790	168
AASS	ENSG00000008311_79150.1	1945	430
AASS	ENSG00000008311_79151.2	517	229
AASS	ENSG00000008311_79153.4	675	384
AASS	ENSG00000008311_79154.5	958	197
AASS	ENSG00000008311_79155.6	695	6
AASS	ENSG00000008311_79156.7	626	222
AASS	ENSG00000008311_79157.8	763	145
AASS	ENSG00000008311_79158.9	1446	402
AASS	ENSG00000008311_79159.10	167	0
AASS	sgAASS_1	1268	224
ABCA1	ENSG00000165029_148855.1	306	29
ABCA1	ENSG00000165029_148856.2	467	75
ABCA1	ENSG00000165029_148857.3	338	8
ABCA1	ENSG00000165029_148858.4	846	148
ABCA1	ENSG00000165029_148859.5	2345	459
ABCA1	ENSG00000165029_148860.6	2254	353
ABCA1	ENSG00000165029_148861.7	487	193
ABCA1	ENSG00000165029_148862.8	708	205
ABCA1	ENSG00000165029_148863.9	2153	384
ABCA1	ENSG00000165029_148864.10	937	269
ABCA3	ENSG00000167972_90075.1	145	93
ABCA3	ENSG00000167972_90076.2	224	20
ABCA3	ENSG00000167972_90077.3	422	91
ABCA3	ENSG00000167972_90078.4	1179	154
ABCA3	ENSG00000167972_90079.5	532	131
ABCA3	ENSG00000167972_90080.6	550	158
ABCA3	ENSG00000167972_90081.7	772	179
ABCA3	ENSG00000167972_90082.8	564	138
ABCA3	ENSG00000167972_90083.9	107	49
ABCA3	ENSG00000167972_90084.10	1015	184
ABCA6	ENSG00000154262_30007.1	2804	640
ABCA6	ENSG00000154262_30008.2	1618	356
ABCA6	ENSG00000154262_30009.3	2241	253
ABCA6	ENSG00000154262_30010.4	1842	277
ABCA6	ENSG00000154262_30011.5	1924	399
ABCA6	ENSG00000154262_30012.6	3396	824
ABCA6	ENSG00000154262_30013.7	2385	185
ABCA6	ENSG00000154262_30014.8	3711	592
ABCA6	ENSG00000154262_30015.9	2200	497
ABCA6	ENSG00000154262_30016.10	2935	619
ABCC2	ENSG00000023839_106649.1	635	23
ABCC2	ENSG00000023839_106650.2	2498	566
ABCC2	ENSG00000023839_106651.3	606	189
ABCC2	ENSG00000023839_106652.4	904	157
ABCC2	ENSG00000023839_106653.5	1868	275
ABCC2	ENSG00000023839_106654.6	2830	388
ABCC2	ENSG00000023839_106655.7	4317	1225
ABCC2	ENSG00000023839_106656.8	3564	692
ABCC2	ENSG00000023839_106657.9	786	126
ABCC2	ENSG00000023839_106658.10	942	412
AC004899.1	ENSG00000267970_69555.1	1316	464
AC004899.1	ENSG00000267970_69557.3	720	60
AC004899.1	ENSG00000267970_69558.4	1187	279
AC004899.1	ENSG00000267970_69559.5	643	89
AC004899.1	ENSG00000267970_69560.6	627	14
AC004899.1	ENSG00000267970_69561.7	1585	312
AC004899.1	ENSG00000267970_69562.8	979	593
AC004899.1	ENSG00000267970_69563.9	1167	174
AC004899.1	ENSG00000267970_69564.10	670	174
AC004899.1	refill	623	175
AC006449.1	ENSG00000269094_150621.1	1201	362
AC006449.1	ENSG00000269094_150622.2	224	64
AC006449.1	ENSG00000269094_150623.3	809	249
AC006449.1	ENSG00000269094_150624.4	698	142
AC006449.1	ENSG00000269094_150626.6	1454	218
AC006449.1	ENSG00000269094_150627.7	1704	494
AC006449.1	ENSG00000269094_150628.8	3170	760
AC006449.1	ENSG00000269094_150629.9	4111	551
AC006449.1	ENSG00000269094_150630.10	592	170
AC006449.1	refill	327	40
AC011239.1	ENSG00000224361_14322.1	1637	410
AC011239.1	ENSG00000224361_14323.2	1188	182
AC011239.1	ENSG00000224361_14324.3	1487	396
AC011239.1	ENSG00000224361_14325.4	2380	191
AC011239.1	ENSG00000224361_14326.5	391	205
AC011239.1	ENSG00000224361_14327.6	832	360
AC011239.1	ENSG00000224361_14328.7	1673	644
AC011239.1	ENSG00000224361_14329.8	1145	387
AC011239.1	ENSG00000224361_14330.9	660	76
AC011239.1	ENSG00000224361_14331.10	1672	348
AC011500.1	ENSG00000213922_80380.1	3522	741
AC011500.1	ENSG00000213922_80381.2	767	263
AC011500.1	ENSG00000213922_80382.3	196	57
AC011500.1	ENSG00000213922_80383.4	1572	345
AC011500.1	ENSG00000213922_80384.5	806	80
AC011500.1	ENSG00000213922_80385.6	3653	849
AC011500.1	ENSG00000213922_80386.7	535	45
AC011500.1	ENSG00000213922_80387.8	1825	287
AC011500.1	ENSG00000213922_80388.9	1157	273
AC011500.1	ENSG00000213922_80389.10	1203	291
AC019294.1	ENSG00000256530_26985.1	3368	762
AC019294.1	ENSG00000256530_26986.2	846	130
AC019294.1	ENSG00000256530_26987.3	171	46
AC019294.1	ENSG00000256530_26988.4	894	199
AC019294.1	ENSG00000256530_26989.5	673	41
AC019294.1	ENSG00000256530_26990.6	1323	231
AC019294.1	ENSG00000256530_26992.8	395	24
AC019294.1	ENSG00000256530_26993.9	1222	315
AC019294.1	ENSG00000256530_26994.10	433	111
AC019294.1	refill	33	0
AC022431.2	ENSG00000225940_185065.1	756	34
AC022431.2	ENSG00000225940_185066.2	1710	227
AC022431.2	ENSG00000225940_185067.3	714	457
AC022431.2	ENSG00000225940_185068.4	1140	294
AC022431.2	ENSG00000225940_185069.5	967	53
AC022431.2	ENSG00000225940_185070.6	1353	348
AC022431.2	ENSG00000225940_185071.7	340	32
AC022431.2	ENSG00000225940_185072.8	657	47
AC022431.2	ENSG00000225940_185073.9	512	112
AC022431.2	ENSG00000225940_185074.10	1535	518
AC040160.1	ENSG00000237102_93944.1	238	32
AC040160.1	ENSG00000237102_93945.2	532	50
AC040160.1	ENSG00000237102_93946.3	468	8
AC040160.1	ENSG00000237102_93947.4	591	204
AC040160.1	ENSG00000237102_93948.5	523	113
AC040160.1	ENSG00000237102_93949.6	690	122
AC040160.1	ENSG00000237102_93950.7	1369	511
AC040160.1	ENSG00000237102_93951.8	407	59
AC040160.1	ENSG00000237102_93952.9	453	190
AC040160.1	ENSG00000237102_93953.10	791	133
AC069547.2	ENSG00000269700_140932.1	996	137
AC069547.2	ENSG00000269700_140933.2	2162	266
AC069547.2	ENSG00000269700_140934.3	1402	149
AC069547.2	ENSG00000269700_140935.4	817	131
AC069547.2	ENSG00000269700_140936.5	971	91
AC069547.2	ENSG00000269700_140937.6	629	118
AC069547.2	ENSG00000269700_140938.7	1677	320
AC069547.2	ENSG00000269700_140939.8	1901	222
AC069547.2	ENSG00000269700_140940.9	1812	1178
AC069547.2	ENSG00000269700_140941.10	729	144
AC131097.4	ENSG00000216921_39855.1	2841	530
AC131097.4	ENSG00000216921_39856.2	1491	249
AC131097.4	ENSG00000216921_39857.3	2410	328
AC131097.4	ENSG00000216921_39858.4	169	600
AC131097.4	ENSG00000216921_39859.5	2648	466
AC131097.4	ENSG00000216921_39860.6	2509	82
AC131097.4	ENSG00000216921_39861.7	748	62
AC131097.4	ENSG00000216921_39862.8	312	40
AC131097.4	ENSG00000216921_39863.9	491	211
AC131097.4	ENSG00000216921_39864.10	415	68
AC139426.2	ENSG00000233812_128405.1	293	114
AC139426.2	ENSG00000233812_128406.2	46	0
AC139426.2	ENSG00000233812_128407.3	153	46
AC139426.2	ENSG00000233812_128408.4	216	37
AC139426.2	ENSG00000233812_128409.5	386	31
AC139426.2	ENSG00000233812_128410.6	154	42
AC139426.2	ENSG00000233812_128411.7	427	114
AC139426.2	ENSG00000233812_128412.8	195	28
AC139426.2	ENSG00000233812_128413.9	44	0
AC139426.2	ENSG00000233812_128414.10	263	74
AC145676.2	ENSG00000249852_151981.1	3690	472
AC145676.2	ENSG00000249852_151982.2	1371	397
AC145676.2	ENSG00000249852_151983.3	203	108
AC145676.2	ENSG00000249852_151984.4	1574	369
AC145676.2	ENSG00000249852_151985.5	468	17
AC145676.2	ENSG00000249852_151986.6	859	239
AC145676.2	ENSG00000249852_151988.8	514	75
AC145676.2	ENSG00000249852_151989.9	968	177
AC145676.2	ENSG00000249852_151990.10	20	7
AC145676.2	refill	1220	254
ACAA1	ENSG00000060971_47359.1	901	122
ACAA1	ENSG00000060971_47360.2	1160	234
ACAA1	ENSG00000060971_47361.3	405	68
ACAA1	ENSG00000060971_47362.4	185	2
ACAA1	ENSG00000060971_47363.5	2466	699
ACAA1	ENSG00000060971_47364.6	630	115
ACAA1	ENSG00000060971_47365.7	2673	538
ACAA1	ENSG00000060971_47366.8	788	218
ACAA1	ENSG00000060971_47367.9	1778	217
ACAA1	ENSG00000060971_47368.10	193	27
ACAT2	ENSG00000120437_170221.1	6663	1708
ACAT2	ENSG00000120437_170222.2	607	42
ACAT2	ENSG00000120437_170223.3	3038	994
ACAT2	ENSG00000120437_170224.4	399	279
ACAT2	ENSG00000120437_170225.5	928	152
ACAT2	ENSG00000120437_170226.6	1235	329
ACAT2	ENSG00000120437_170227.7	1793	362
ACAT2	ENSG00000120437_170228.8	383	73
ACAT2	ENSG00000120437_170229.9	700	244
ACAT2	ENSG00000120437_170230.10	3463	1041
ACBD6	ENSG00000135847_47119.1	504	431
ACBD6	ENSG00000135847_47120.2	663	54
ACBD6	ENSG00000135847_47121.3	468	94
ACBD6	ENSG00000135847_47122.4	957	97
ACBD6	ENSG00000135847_47123.5	428	389
ACBD6	ENSG00000135847_47124.6	667	18
ACBD6	ENSG00000135847_47125.7	490	42
ACBD6	ENSG00000135847_47126.8	452	31
ACBD6	ENSG00000135847_47127.9	1181	211
ACBD6	ENSG00000135847_47128.10	504	36
ACCS	ENSG00000110455_24456.1	2153	442
ACCS	ENSG00000110455_24457.2	538	29
ACCS	ENSG00000110455_24458.3	1087	266
ACCS	ENSG00000110455_24459.4	2637	277
ACCS	ENSG00000110455_24460.5	1122	56
ACCS	ENSG00000110455_24461.6	688	19
ACCS	ENSG00000110455_24462.7	1187	192
ACCS	ENSG00000110455_24463.8	1733	369
ACCS	ENSG00000110455_24464.9	1139	270
ACCS	ENSG00000110455_24465.10	285	32
ACSM1	ENSG00000166743_145325.1	606	67
ACSM1	ENSG00000166743_145326.2	1793	378
ACSM1	ENSG00000166743_145327.3	973	35
ACSM1	ENSG00000166743_145328.4	1100	133
ACSM1	ENSG00000166743_145329.5	1365	152
ACSM1	ENSG00000166743_145330.6	3507	823
ACSM1	ENSG00000166743_145331.7	1085	189
ACSM1	ENSG00000166743_145332.8	356	114
ACSM1	ENSG00000166743_145333.9	692	235
ACSM1	ENSG00000166743_145334.10	1700	296
ACSM4	ENSG00000215009_46811.1	1269	227
ACSM4	ENSG00000215009_46812.2	2214	338
ACSM4	ENSG00000215009_46813.3	850	234
ACSM4	ENSG00000215009_46814.4	1469	217
ACSM4	ENSG00000215009_46815.5	3368	472
ACSM4	ENSG00000215009_46816.6	2515	582
ACSM4	ENSG00000215009_46817.7	1706	501
ACSM4	ENSG00000215009_46818.8	1110	269
ACSM4	ENSG00000215009_46819.9	2391	162
ACSM4	ENSG00000215009_46820.10	1488	76
ACSM5	ENSG00000183549_134863.1	2217	524
ACSM5	ENSG00000183549_134864.2	1803	347
ACSM5	ENSG00000183549_134865.3	3360	962
ACSM5	ENSG00000183549_134866.4	4802	928
ACSM5	ENSG00000183549_134867.5	1138	15
ACSM5	ENSG00000183549_134868.6	221	58
ACSM5	ENSG00000183549_134869.7	1206	110
ACSM5	ENSG00000183549_134870.8	830	330
ACSM5	ENSG00000183549_134871.9	643	274
ACSM5	ENSG00000183549_134872.10	1113	166
ACTG2	ENSG00000163017_74841.1	1334	287
ACTG2	ENSG00000163017_74842.2	84	0
ACTG2	ENSG00000163017_74843.3	406	0
ACTG2	ENSG00000163017_74844.4	509	86
ACTG2	ENSG00000163017_74845.5	2521	559
ACTG2	ENSG00000163017_74846.6	2290	616
ACTG2	ENSG00000163017_74847.7	433	0
ACTG2	ENSG00000163017_74848.8	1199	455
ACTG2	ENSG00000163017_74849.9	1248	242
ACTG2	ENSG00000163017_74850.10	527	92
ACTL6B	ENSG00000077080_172749.1	236	39
ACTL6B	ENSG00000077080_172750.2	580	2
ACTL6B	ENSG00000077080_172751.3	619	104
ACTL6B	ENSG00000077080_172753.5	629	11
ACTL6B	ENSG00000077080_172754.6	1044	195
ACTL6B	ENSG00000077080_172755.7	1615	617
ACTL6B	ENSG00000077080_172756.8	3322	737
ACTL6B	ENSG00000077080_172757.9	881	98
ACTL6B	ENSG00000077080_172758.10	1936	428
ACTL6B	sgACTL6B_1	913	97
ADAM28	ENSG00000042980_110477.1	1371	388
ADAM28	ENSG00000042980_110478.2	1418	145
ADAM28	ENSG00000042980_110479.3	2189	200
ADAM28	ENSG00000042980_110480.4	3339	909
ADAM28	ENSG00000042980_110481.5	1573	508
ADAM28	ENSG00000042980_110482.6	1770	163
ADAM28	ENSG00000042980_110483.7	2123	365
ADAM28	ENSG00000042980_110484.8	2275	693
ADAM28	ENSG00000042980_110485.9	2892	935
ADAM28	ENSG00000042980_110486.10	352	91
ADAM7	ENSG00000069206_197250.1	1774	660
ADAM7	ENSG00000069206_197251.2	3735	1142
ADAM7	ENSG00000069206_197252.3	1073	163
ADAM7	ENSG00000069206_197253.4	850	258
ADAM7	ENSG00000069206_197254.5	2407	690
ADAM7	ENSG00000069206_197255.6	1733	431
ADAM7	ENSG00000069206_197256.7	2621	896
ADAM7	ENSG00000069206_197257.8	1069	269
ADAM7	ENSG00000069206_197258.9	1833	208
ADAM7	ENSG00000069206_197259.10	1290	201
ADH1B	ENSG00000196616_13035.1	951	269
ADH1B	ENSG00000196616_13036.2	2375	798
ADH1B	ENSG00000196616_13037.3	622	82
ADH1B	ENSG00000196616_13038.4	3926	1026
ADH1B	ENSG00000196616_13039.5	955	86
ADH1B	ENSG00000196616_13040.6	1164	30
ADH1B	ENSG00000196616_13041.7	3557	1287
ADH1B	ENSG00000196616_13042.8	1246	32
ADH1B	ENSG00000196616_13043.9	1836	250
ADH1B	ENSG00000196616_13044.10	5379	1359
ADH1C	ENSG00000248144_137091.1	2042	235
ADH1C	ENSG00000248144_137092.2	2827	479
ADH1C	ENSG00000248144_137093.3	527	51
ADH1C	ENSG00000248144_137094.4	3673	573
ADH1C	ENSG00000248144_137095.5	4050	1856
ADH1C	ENSG00000248144_137096.6	647	92
ADH1C	ENSG00000248144_137097.7	4595	1028
ADH1C	ENSG00000248144_137098.8	403	87
ADH1C	ENSG00000248144_137099.9	426	225
ADH1C	ENSG00000248144_137100.10	2764	316
ADK	ENSG00000156110_136689.1	844	163
ADK	ENSG00000156110_136690.2	1390	767
ADK	ENSG00000156110_136691.3	1593	291
ADK	ENSG00000156110_136692.4	1312	110
ADK	ENSG00000156110_136693.5	703	45
ADK	ENSG00000156110_136694.6	1354	431
ADK	ENSG00000156110_136695.7	1642	259
ADK	ENSG00000156110_136696.8	2267	761
ADK	ENSG00000156110_136697.9	1524	518
ADK	ENSG00000156110_136698.10	1840	301
ADORA2B	ENSG00000170425_56191.1	1527	240
ADORA2B	ENSG00000170425_56192.2	281	16
ADORA2B	ENSG00000170425_56193.3	163	86
ADORA2B	ENSG00000170425_56194.4	1047	257
ADORA2B	ENSG00000170425_56195.5	4360	584
ADORA2B	ENSG00000170425_56196.6	649	27
ADORA2B	ENSG00000170425_56197.7	747	143
ADORA2B	ENSG00000170425_56198.8	1381	190
ADORA2B	ENSG00000170425_56199.9	786	22
ADORA2B	ENSG00000170425_56200.10	4604	1549
ADRB3	ENSG00000188778_133413.1	830	96
ADRB3	ENSG00000188778_133414.2	545	34
ADRB3	ENSG00000188778_133415.3	1452	116
ADRB3	ENSG00000188778_133416.4	890	132
ADRB3	ENSG00000188778_133417.5	982	618
ADRB3	ENSG00000188778_133418.6	334	139
ADRB3	ENSG00000188778_133419.7	0	0
ADRB3	ENSG00000188778_133420.8	1200	65
ADRB3	ENSG00000188778_133421.9	189	0
ADRB3	ENSG00000188778_133422.10	225	0
AGAP3	ENSG00000133612_148615.1	207	12
AGAP3	ENSG00000133612_148616.2	3148	1196
AGAP3	ENSG00000133612_148617.3	2333	393
AGAP3	ENSG00000133612_148618.4	737	162
AGAP3	ENSG00000133612_148619.5	876	141
AGAP3	ENSG00000133612_148620.6	1321	176
AGAP3	ENSG00000133612_148621.7	1396	267
AGAP3	ENSG00000133612_148622.8	789	274
AGAP3	ENSG00000133612_148623.9	453	42
AGAP3	ENSG00000133612_148624.10	839	232
AK1	ENSG00000106992_64128.1	1160	161
AK1	ENSG00000106992_64129.2	538	61
AK1	ENSG00000106992_64130.3	1331	89
AK1	ENSG00000106992_64131.4	917	38
AK1	ENSG00000106992_64132.5	930	304
AK1	ENSG00000106992_64133.6	3094	591
AK1	ENSG00000106992_64134.7	195	68
AK1	ENSG00000106992_64135.8	1030	109
AK1	ENSG00000106992_64136.9	56	0
AK1	ENSG00000106992_64137.10	852	131
AKR7L	ENSG00000211454_28513.1	1493	74
AKR7L	ENSG00000211454_28514.2	127	0
AKR7L	ENSG00000211454_28515.3	811	319
AKR7L	ENSG00000211454_28516.4	331	130
AKR7L	ENSG00000211454_28518.6	130	22
AKR7L	ENSG00000211454_28519.7	1712	305
AKR7L	ENSG00000211454_28520.8	318	25
AKR7L	ENSG00000211454_28521.9	202	43
AKR7L	ENSG00000211454_28522.10	1053	252
AKR7L	refill	976	181
AL133262.1	ENSG00000267849_135043.1	4509	836
AL133262.1	ENSG00000267849_135044.2	1548	326
AL133262.1	ENSG00000267849_135045.3	2410	527
AL133262.1	ENSG00000267849_135046.4	2867	1171
AL162424.1	ENSG00000269738_45587.1	743	230
AL162424.1	ENSG00000269738_45588.2	119	32
AL162424.1	ENSG00000269738_45589.3	23	0
AL162424.1	ENSG00000269738_45590.4	0	0
AL360181.1	ENSG00000268882_108091.1	753	34
AL360181.1	ENSG00000268882_108092.2	161	33
AL360181.1	ENSG00000268882_108094.4	425	219
AL360181.1	ENSG00000268882_108095.5	208	53
AL360181.1	ENSG00000268882_108096.6	424	3
AL360181.1	ENSG00000268882_108097.7	416	121
AL360181.1	ENSG00000268882_108098.8	602	0
AL360181.1	ENSG00000268882_108099.9	270	53
AL360181.1	ENSG00000268882_108100.10	421	95
AL360181.1	refill	1235	371
AL590483.1	ENSG00000268146_98508.1	902	128
AL590483.1	ENSG00000268146_98509.2	896	122
AL590483.1	ENSG00000268146_98510.3	2860	908
AL590483.1	ENSG00000268146_98511.4	1999	538
AL590483.1	ENSG00000268146_98512.5	1060	270
AL590483.1	ENSG00000268146_98513.6	1391	311
AL590483.1	ENSG00000268146_98514.7	549	0
AL590483.1	ENSG00000268146_98515.8	3538	1314
AL590483.1	ENSG00000268146_98516.9	3445	1182
AL590483.1	ENSG00000268146_98517.10	1978	234
AL929472.1	ENSG00000230610_168063.1	996	254
AL929472.1	ENSG00000230610_168064.2	2080	472
AL929472.1	ENSG00000230610_168065.3	919	160
ALDH3A2	ENSG00000072210_27565.1	347	16
ALDH3A2	ENSG00000072210_27566.2	562	183
ALDH3A2	ENSG00000072210_27567.3	222	16
ALDH3A2	ENSG00000072210_27568.4	1360	565
ALDH3A2	ENSG00000072210_27569.5	518	87
ALDH3A2	ENSG00000072210_27570.6	687	102
ALDH3A2	ENSG00000072210_27571.7	2074	481
ALDH3A2	ENSG00000072210_27572.8	624	373
ALDH3A2	ENSG00000072210_27573.9	696	268
ALDH3A2	ENSG00000072210_27574.10	1515	411
ALG3	ENSG00000214160_155824.1	303	82
ALG3	ENSG00000214160_155825.2	1996	309
ALG3	ENSG00000214160_155826.3	648	479
ALG3	ENSG00000214160_155827.4	767	212
ALG3	ENSG00000214160_155828.5	663	165
ALG3	ENSG00000214160_155829.6	811	192
ALG3	ENSG00000214160_155830.7	2064	858
ALG3	ENSG00000214160_155831.8	3801	485
ALG3	ENSG00000214160_155832.9	2653	1647
ALG3	ENSG00000214160_155833.10	675	312
ALKBH8	ENSG00000137760_7080.1	620	183
ALKBH8	ENSG00000137760_7081.2	3326	560
ALKBH8	ENSG00000137760_7082.3	1846	477
ALKBH8	ENSG00000137760_7083.4	1870	358
ALKBH8	ENSG00000137760_7084.5	315	39
ALKBH8	ENSG00000137760_7085.6	866	161
ALKBH8	ENSG00000137760_7086.7	256	91
ALKBH8	ENSG00000137760_7087.8	1341	377
ALKBH8	ENSG00000137760_7088.9	1129	204
ALKBH8	ENSG00000137760_7089.10	531	69
AMDHD2	ENSG00000162066_25206.1	16	0
AMDHD2	ENSG00000162066_25207.2	525	43
AMDHD2	ENSG00000162066_25208.3	2598	831
AMDHD2	ENSG00000162066_25209.4	637	73
AMDHD2	ENSG00000162066_25210.5	807	113
AMDHD2	ENSG00000162066_25211.6	658	345
AMDHD2	ENSG00000162066_25212.7	791	151
AMDHD2	ENSG00000162066_25213.8	189	183
AMDHD2	ENSG00000162066_25214.9	1935	609
AMDHD2	ENSG00000162066_25215.10	1496	390
AMN1	ENSG00000151743_66675.1	1911	264
AMN1	ENSG00000151743_66676.2	2102	606
AMN1	ENSG00000151743_66677.3	1397	684
AMN1	ENSG00000151743_66678.4	1811	439
AMN1	ENSG00000151743_66679.5	1091	433
AMN1	ENSG00000151743_66680.6	1225	170
AMN1	ENSG00000151743_66681.7	1379	765
AMN1	ENSG00000151743_66682.8	1916	635
AMN1	ENSG00000151743_66683.9	2273	554
AMN1	ENSG00000151743_66684.10	1115	213
AMOTL1	ENSG00000166025_40563.1	1399	322
AMOTL1	ENSG00000166025_40564.2	1209	291
AMOTL1	ENSG00000166025_40565.3	677	359
AMOTL1	ENSG00000166025_40566.4	880	103
AMOTL1	ENSG00000166025_40567.5	419	72
AMOTL1	ENSG00000166025_40568.6	680	90
AMOTL1	ENSG00000166025_40569.7	2671	843
AMOTL1	ENSG00000166025_40570.8	1525	846
AMOTL1	ENSG00000166025_40571.9	403	117
AMOTL1	ENSG00000166025_40572.10	1846	320
AMPD1	ENSG00000116748_138556.1	868	217
AMPD1	ENSG00000116748_138557.2	3017	446
AMPD1	ENSG00000116748_138558.3	789	179
AMPD1	ENSG00000116748_138559.4	2368	483
AMPD1	ENSG00000116748_138560.5	342	120
AMPD1	ENSG00000116748_138561.6	627	150
AMPD1	ENSG00000116748_138562.7	1506	183
AMPD1	ENSG00000116748_138563.8	1279	610
AMPD1	ENSG00000116748_138564.9	632	62
AMPD1	ENSG00000116748_138565.10	251	29
ANGPTL7	ENSG00000171819_197610.1	1712	370
ANGPTL7	ENSG00000171819_197611.2	979	133
ANGPTL7	ENSG00000171819_197612.3	1898	175
ANGPTL7	ENSG00000171819_197613.4	539	49
ANGPTL7	ENSG00000171819_197614.5	434	213
ANGPTL7	ENSG00000171819_197615.6	650	128
ANGPTL7	ENSG00000171819_197616.7	199	0
ANGPTL7	ENSG00000171819_197617.8	543	208
ANGPTL7	ENSG00000171819_197618.9	774	70
ANGPTL7	ENSG00000171819_197619.10	758	167
ANKFY1	ENSG00000185722_101505.1	901	1047
ANKFY1	ENSG00000185722_101506.2	333	21
ANKFY1	ENSG00000185722_101507.3	316	88
ANKFY1	ENSG00000185722_101508.4	1018	858
ANKFY1	ENSG00000185722_101509.5	2001	3229
ANKFY1	ENSG00000185722_101510.6	1089	3253
ANKFY1	ENSG00000185722_101511.7	869	1152
ANKFY1	ENSG00000185722_101512.8	1105	1355
ANKFY1	ENSG00000185722_101513.9	1942	2381
ANKFY1	ENSG00000185722_101514.10	2040	1428
ANKH	ENSG00000154122_179085.1	236	14
ANKH	ENSG00000154122_179086.2	1612	263
ANKH	ENSG00000154122_179087.3	588	0
ANKH	ENSG00000154122_179088.4	878	46
ANKH	ENSG00000154122_179089.5	2476	500
ANKH	ENSG00000154122_179090.6	481	91
ANKH	ENSG00000154122_179091.7	658	99
ANKH	ENSG00000154122_179092.8	306	40
ANKH	ENSG00000154122_179093.9	1285	127
ANKH	ENSG00000154122_179094.10	831	150
ANKRD11	ENSG00000167522_6810.1	379	3
ANKRD11	ENSG00000167522_6811.2	579	237
ANKRD11	ENSG00000167522_6812.3	460	0
ANKRD11	ENSG00000167522_6813.4	1456	440
ANKRD11	ENSG00000167522_6814.5	776	310
ANKRD11	ENSG00000167522_6815.6	512	102
ANKRD11	ENSG00000167522_6816.7	621	62
ANKRD11	ENSG00000167522_6817.8	106	144
ANKRD11	ENSG00000167522_6818.9	1958	754
ANKRD11	ENSG00000167522_6819.10	1382	384
ANKRD24	ENSG00000089847_110988.1	306	30
ANKRD24	ENSG00000089847_110989.2	732	214
ANKRD24	ENSG00000089847_110990.3	414	130
ANKRD24	ENSG00000089847_110991.4	748	201
ANKRD24	ENSG00000089847_110992.5	1084	140
ANKRD24	ENSG00000089847_110993.6	653	29
ANKRD24	ENSG00000089847_110994.7	1573	403
ANKRD24	ENSG00000089847_110995.8	253	0
ANKRD24	ENSG00000089847_110996.9	765	492
ANKRD24	ENSG00000089847_110997.10	962	73
ANKRD44	ENSG00000065413_131619.1	2197	409
ANKRD44	ENSG00000065413_131620.2	2235	841
ANKRD44	ENSG00000065413_131621.3	287	56
ANKRD44	ENSG00000065413_131622.4	1461	90
ANKRD44	ENSG00000065413_131623.5	1579	195
ANKRD44	ENSG00000065413_131624.6	2003	280
ANKRD44	ENSG00000065413_131625.7	691	216
ANKRD44	ENSG00000065413_131626.8	595	120
ANKRD44	ENSG00000065413_131627.9	485	46
ANKRD44	ENSG00000065413_131628.10	635	59
ANO10	ENSG00000160746_143582.1	1102	407
ANO10	ENSG00000160746_143583.2	924	213
ANO10	ENSG00000160746_143584.3	1645	401
ANO10	ENSG00000160746_143585.4	1113	522
ANO10	ENSG00000160746_143586.5	2359	283
ANO10	ENSG00000160746_143587.6	1217	375
ANO10	ENSG00000160746_143588.7	2610	872
ANO10	ENSG00000160746_143589.8	2508	173
ANO10	ENSG00000160746_143590.9	3178	550
ANO10	ENSG00000160746_143591.10	1078	338
ANPEP	ENSG00000166825_96913.1	546	214
ANPEP	ENSG00000166825_96914.2	229	24
ANPEP	ENSG00000166825_96915.3	1363	345
ANPEP	ENSG00000166825_96916.4	370	396
ANPEP	ENSG00000166825_96917.5	545	56
ANPEP	ENSG00000166825_96918.6	684	94
ANPEP	ENSG00000166825_96919.7	1258	551
ANPEP	ENSG00000166825_96920.8	832	106
ANPEP	ENSG00000166825_96921.9	2414	433
ANPEP	ENSG00000166825_96922.10	934	87
AP000867.1	ENSG00000187811_22124.1	1428	275
AP000867.1	ENSG00000187811_22125.2	5765	823
AP000867.1	ENSG00000187811_22126.3	1568	380
AP000867.1	ENSG00000187811_22127.4	1213	358
AP000867.1	ENSG00000187811_22128.5	678	250
AP000867.1	ENSG00000187811_22129.6	270	2
AP000867.1	ENSG00000187811_22130.7	2051	447
AP000867.1	ENSG00000187811_22131.8	460	235
AP000867.1	ENSG00000187811_22132.9	21	0
AP000867.1	ENSG00000187811_22133.10	4	0
AP001631.10	ENSG00000228120_28088.1	1493	366
AP001631.10	ENSG00000228120_28089.2	826	37
AP001631.10	ENSG00000228120_28090.3	436	25
AP001631.10	ENSG00000228120_28091.4	490	98
AP001631.10	ENSG00000228120_28092.5	612	119
AP001631.10	ENSG00000228120_28093.6	413	82
AP001631.10	ENSG00000228120_28094.7	441	70
AP001631.10	ENSG00000228120_28095.8	533	42
AP001631.10	ENSG00000228120_28096.9	544	59
AP001631.10	ENSG00000228120_28097.10	309	48
AP1G2	ENSG00000213983_129793.1	724	67
AP1G2	ENSG00000213983_129794.2	564	18
AP1G2	ENSG00000213983_129795.3	415	46
AP1G2	ENSG00000213983_129796.4	1383	392
AP1G2	ENSG00000213983_129797.5	1764	317
AP1G2	ENSG00000213983_129798.6	926	33
AP1G2	ENSG00000213983_129799.7	369	30
AP1G2	ENSG00000213983_129800.8	554	159
AP1G2	ENSG00000213983_129801.9	395	12
AP1G2	ENSG00000213983_129802.10	838	131
AP2A1	ENSG00000196961_12665.1	1057	234
AP2A1	ENSG00000196961_12666.2	2411	305
AP2A1	ENSG00000196961_12667.3	2700	1661
AP2A1	ENSG00000196961_12668.4	293	120
AP2A1	ENSG00000196961_12669.5	1605	678
AP2A1	ENSG00000196961_12670.6	994	226
AP2A1	ENSG00000196961_12671.7	425	344
AP2A1	ENSG00000196961_12673.9.V	561	135
AP2A1	ENSG00000196961_12674.10.V	0	0
AP2A1	sgAP2A1_1	544	134
AP2A2	ENSG00000183020_124944.1	1124	381
AP2A2	ENSG00000183020_124945.2	443	77
AP2A2	ENSG00000183020_124946.3	569	198
AP2A2	ENSG00000183020_124947.4	1010	170
AP2A2	ENSG00000183020_124948.5	1361	281
AP2A2	ENSG00000183020_124949.6	1152	193
AP2A2	ENSG00000183020_124950.7	199	0
AP2A2	ENSG00000183020_124951.8	2004	650
AP2A2	ENSG00000183020_124952.9	3031	1180
AP2A2	ENSG00000183020_124953.10	72	123
AP2M1	ENSG00000161203_103053.1	473	454
AP2M1	ENSG00000161203_103054.2	221	690
AP2M1	ENSG00000161203_103055.3	339	131
AP2M1	ENSG00000161203_103056.4	117	143
AP2M1	ENSG00000161203_103057.5	184	393
AP2M1	ENSG00000161203_103058.6	782	777
AP2M1	ENSG00000161203_103059.7	491	1040
AP2M1	ENSG00000161203_103060.8	1157	358
AP2M1	ENSG00000161203_103061.9	427	1197
AP2M1	ENSG00000161203_103062.10	223	178
AP2S1	ENSG00000042753_7184.1	35	0
AP2S1	ENSG00000042753_7185.2	394	726
AP2S1	ENSG00000042753_7186.3	717	348
AP2S1	ENSG00000042753_7187.4	450	60
AP2S1	ENSG00000042753_7188.5	2355	1417
AP2S1	ENSG00000042753_7189.6	466	132
AP2S1	ENSG00000042753_7190.7	2789	479
AP2S1	ENSG00000042753_7191.8	58	18
AP2S1	ENSG00000042753_7192.9	173	159
AP2S1	ENSG00000042753_7193.10	758	317
AP3D1	ENSG00000065000_156334.1	1328	375
AP3D1	ENSG00000065000_156335.2	743	160
AP3D1	ENSG00000065000_156336.3	610	261
AP3D1	ENSG00000065000_156337.4	209	20
AP3D1	ENSG00000065000_156338.5	1312	92
AP3D1	ENSG00000065000_156339.6	615	2
AP3D1	ENSG00000065000_156340.7	492	88
AP3D1	ENSG00000065000_156341.8	369	3
AP3D1	ENSG00000065000_156342.9	407	13
AP3D1	ENSG00000065000_156343.10	472	169
AP5S1	ENSG00000125843_20396.1	1425	460
AP5S1	ENSG00000125843_20397.2	1592	178
AP5S1	ENSG00000125843_20398.3	2526	981
AP5S1	ENSG00000125843_20399.4	476	105
AP5S1	ENSG00000125843_20400.5	665	193
AP5S1	ENSG00000125843_20401.6	377	16
AP5S1	ENSG00000125843_20402.7	1022	66
AP5S1	ENSG00000125843_20403.8	692	97
AP5S1	ENSG00000125843_20404.9	3983	1352
AP5S1	ENSG00000125843_20405.10	647	223
AP5Z1	ENSG00000242802_165342.2	217	17
AP5Z1	ENSG00000242802_165343.3	632	16
AP5Z1	ENSG00000242802_165344.4	1272	422
AP5Z1	ENSG00000242802_165345.5	1518	168
AP5Z1	ENSG00000242802_165346.6	319	18
AP5Z1	ENSG00000242802_165347.7	388	32
AP5Z1	ENSG00000242802_165348.8	485	0
AP5Z1	ENSG00000242802_165349.9	408	72
AP5Z1	ENSG00000242802_165350.10	1245	160
AP5Z1	sgAP5Z1_1	111	5
APEX1	ENSG00000100823_124234.1	2005	421
APEX1	ENSG00000100823_124235.2	1821	190
APEX1	ENSG00000100823_124237.4	712	97
APEX1	ENSG00000100823_124238.5	4455	665
APEX1	ENSG00000100823_124239.6	1183	111
APEX1	ENSG00000100823_124240.7	1412	479
APEX1	ENSG00000100823_124241.8	141	26
APEX1	ENSG00000100823_124242.9	1398	291
APEX1	ENSG00000100823_124243.10	1304	325
APEX1	sgAPEX1_1	1648	422
APOA1BP	ENSG00000163382_141132.1	437	31
APOA1BP	ENSG00000163382_141133.2	741	225
APOA1BP	ENSG00000163382_141134.3	617	94
APOA1BP	ENSG00000163382_141135.4	451	0
APOA1BP	ENSG00000163382_141136.5	1152	257
APOA1BP	ENSG00000163382_141137.6	785	36
APOA1BP	ENSG00000163382_141138.7	678	32
APOA1BP	ENSG00000163382_141139.8	322	107
APOA1BP	ENSG00000163382_141140.9	1268	213
APOA1BP	ENSG00000163382_141141.10	653	0
APOBR	ENSG00000184730_89995.1	232	0
APOBR	ENSG00000184730_89996.2	512	8
APOBR	ENSG00000184730_89997.3	806	226
APOBR	ENSG00000184730_89998.4	664	188
APOBR	ENSG00000184730_89999.5	312	49
APOBR	ENSG00000184730_90000.6	136	0
APOBR	ENSG00000184730_90001.7	1112	267
APOBR	ENSG00000184730_90002.8	1189	39
APOBR	ENSG00000184730_90003.9	1026	126
APOBR	ENSG00000184730_90004.10	832	202
AQR	ENSG00000021776_54908.1	25	0
AQR	ENSG00000021776_54909.2	54	0
AQR	ENSG00000021776_54910.3	1581	285
AQR	ENSG00000021776_54911.4	393	89
AQR	ENSG00000021776_54912.5	3085	504
AQR	ENSG00000021776_54913.6	115	35
AQR	ENSG00000021776_54914.7	166	0
AQR	ENSG00000021776_54915.8	427	231
AQR	ENSG00000021776_54916.9	0	0
AQR	ENSG00000021776_54917.10	9	0
AREL1	ENSG00000119682_153082.1	924	67
AREL1	ENSG00000119682_153083.2	1072	391
AREL1	ENSG00000119682_153084.3	444	43
AREL1	ENSG00000119682_153085.4	1089	291
AREL1	ENSG00000119682_153086.5	358	45
AREL1	ENSG00000119682_153087.6	2028	249
AREL1	ENSG00000119682_153088.7	16	0
AREL1	ENSG00000119682_153089.8	600	48
AREL1	ENSG00000119682_153090.9	1930	633
AREL1	ENSG00000119682_153091.10	310	1
ARF1	ENSG00000143761_174629.1	173	55
ARF1	ENSG00000143761_174630.2	629	779
ARF1	ENSG00000143761_174631.3	945	802
ARF1	ENSG00000143761_174632.4	154	121
ARF1	ENSG00000143761_174633.5	862	909
ARF1	ENSG00000143761_174634.6	54	5
ARF1	ENSG00000143761_174635.7	482	429
ARF1	ENSG00000143761_174636.8	619	616
ARF1	ENSG00000143761_174637.9	198	149
ARF1	ENSG00000143761_174638.10	151	85
ARF4	ENSG00000168374_4209.1	1273	163
ARF4	ENSG00000168374_4210.2	657	5893
ARF4	ENSG00000168374_4211.3	1729	44
ARF4	ENSG00000168374_4212.4	526	4621
ARF4	ENSG00000168374_4213.5	702	1098
ARF4	ENSG00000168374_4214.6	454	1969
ARF4	ENSG00000168374_4215.7	1184	6404
ARF4	ENSG00000168374_4216.8	385	2199
ARF4	ENSG00000168374_4217.9	539	4223
ARF4	ENSG00000168374_4218.10	406	1683
ARHGAP11B	ENSG00000187951_68423.1	136	0
ARHGAP11B	ENSG00000187951_68424.2	557	0
ARHGAP11B	ENSG00000187951_68425.3	712	131
ARHGAP11B	ENSG00000187951_68426.4	810	111
ARHGAP11B	ENSG00000187951_68427.5	1198	119
ARHGAP11B	ENSG00000187951_68428.6	717	437
ARHGAP11B	ENSG00000187951_68429.7	398	0
ARHGAP11B	ENSG00000187951_68430.8	1460	150
ARHGAP11B	ENSG00000187951_68431.9	554	112
ARHGAP11B	ENSG00000187951_68432.10	1756	222
ARHGEF17	ENSG00000110237_67873.1	1149	157
ARHGEF17	ENSG00000110237_67874.2	1419	242
ARHGEF17	ENSG00000110237_67875.3	571	365
ARHGEF17	ENSG00000110237_67876.4	360	0
ARHGEF17	ENSG00000110237_67877.5	433	175
ARHGEF17	ENSG00000110237_67878.6	1736	178
ARHGEF17	ENSG00000110237_67879.7	1155	170
ARHGEF17	ENSG00000110237_67880.8	314	89
ARHGEF17	ENSG00000110237_67881.9	612	202
ARHGEF17	ENSG00000110237_67882.10	836	169
ARID1A	ENSG00000117713_145565.1	829	83
ARID1A	ENSG00000117713_145566.2	482	162
ARID1A	ENSG00000117713_145567.3	1016	150
ARID1A	ENSG00000117713_145568.4	1745	1281
ARID1A	ENSG00000117713_145569.5	842	218
ARID1A	ENSG00000117713_145570.6	782	164
ARID1A	ENSG00000117713_145571.7	823	331
ARID1A	ENSG00000117713_145572.8	3270	492
ARID1A	ENSG00000117713_145573.9	1001	564
ARID1A	ENSG00000117713_145574.10	1073	76
ARL5B	ENSG00000165997_739.1	755	45
ARL5B	ENSG00000165997_740.2	943	266
ARL5B	ENSG00000165997_741.3	2053	475
ARL5B	ENSG00000165997_742.4	1000	427
ARL5B	ENSG00000165997_743.5	2951	612
ARL5B	ENSG00000165997_744.6	2637	156
ARL5B	ENSG00000165997_745.7	1020	189
ARL5B	ENSG00000165997_746.8	2001	316
ARL5B	ENSG00000165997_747.9	438	150
ARL5B	ENSG00000165997_748.10	2167	216
ARL8B	ENSG00000134108_181985.1	121	52
ARL8B	ENSG00000134108_181986.2	736	77
ARL8B	ENSG00000134108_181987.3	105	10
ARL8B	ENSG00000134108_181988.4	149	109
ARL8B	ENSG00000134108_181989.5	1300	63
ARL8B	ENSG00000134108_181990.6	826	274
ARL8B	ENSG00000134108_181991.7	1941	305
ARL8B	ENSG00000134108_181992.8	571	60
ARL8B	ENSG00000134108_181993.9	391	55
ARL8B	ENSG00000134108_181994.10	998	330
ARMC10	ENSG00000170632_159944.1	3131	675
ARMC10	ENSG00000170632_159945.2	466	123
ARMC10	ENSG00000170632_159946.3	728	272
ARMC10	ENSG00000170632_159947.4	2436	585
ARMC10	ENSG00000170632_159948.5	1086	142
ARMC10	ENSG00000170632_159949.6	1043	245
ARMC10	ENSG00000170632_159950.7	287	364
ARMC10	ENSG00000170632_159951.8	259	43
ARMC10	ENSG00000170632_159952.9	2800	861
ARMC10	ENSG00000170632_159953.10	343	0
ARMC12	ENSG00000157343_193302.1	1980	400
ARMC12	ENSG00000157343_193303.2	736	166
ARMC12	ENSG00000157343_193304.3	2330	699
ARMC12	ENSG00000157343_193305.4	361	0
ARMC12	ENSG00000157343_193306.5	604	110
ARMC12	ENSG00000157343_193307.6	1042	157
ARMC12	ENSG00000157343_193308.7	428	213
ARMC12	ENSG00000157343_193309.8	1873	236
ARMC12	ENSG00000157343_193310.9	203	0
ARMC12	ENSG00000157343_193311.10	1312	326
ARMCX4	ENSG00000196440_153843.1	2265	340
ARMCX4	ENSG00000196440_153844.2	2666	492
ARMCX4	ENSG00000196440_153845.3	484	286
ARMCX4	ENSG00000196440_153846.4	390	165
ARMCX4	ENSG00000196440_153847.5	1794	317
ARMCX4	ENSG00000196440_153848.6	2802	462
ARMCX4	ENSG00000196440_153849.7	640	61
ARMCX4	ENSG00000196440_153850.8	3070	512
ARMCX4	ENSG00000196440_153851.9	1880	388
ARMCX4	ENSG00000196440_153852.10	1135	477
ARMS2	ENSG00000254636_183797.1	571	55
ARMS2	ENSG00000254636_183798.2	237	35
ARMS2	ENSG00000254636_183799.3	2015	340
ARMS2	ENSG00000254636_183800.4	735	64
ARMS2	ENSG00000254636_183801.5	451	75
ARMS2	ENSG00000254636_183802.6	260	40
ARMS2	ENSG00000254636_183803.7	610	76
ARMS2	ENSG00000254636_183804.8	1473	867
ARMS2	ENSG00000254636_183805.9	2334	268
ARMS2	ENSG00000254636_183806.10	1016	54
ASB7	ENSG00000183475_50729.1	2738	507
ASB7	ENSG00000183475_50730.2	1190	459
ASB7	ENSG00000183475_50731.3	1681	364
ASB7	ENSG00000183475_50732.4	2251	1004
ASB7	ENSG00000183475_50733.5	1746	440
ASB7	ENSG00000183475_50734.6	750	87
ASB7	ENSG00000183475_50735.7	1117	446
ASB7	ENSG00000183475_50736.8	439	370
ASB7	ENSG00000183475_50737.9	1133	134
ASB7	ENSG00000183475_50738.10	665	125
ASPDH	ENSG00000204653_41921.1	1887	328
ASPDH	ENSG00000204653_41922.2	1822	627
ASPDH	ENSG00000204653_41923.3	517	388
ASPDH	ENSG00000204653_41924.4	2656	418
ASPDH	ENSG00000204653_41925.5	292	70
ASPDH	ENSG00000204653_41926.6	1469	177
ASPDH	ENSG00000204653_41927.7	988	161
ASPDH	ENSG00000204653_41928.8	403	0
ASPDH	ENSG00000204653_41929.9	416	124
ASPDH	sgASPDH_1	660	178
ASPN	ENSG00000106819_202263.1	1367	277
ASPN	ENSG00000106819_202264.2	2628	535
ASPN	ENSG00000106819_202265.3	1448	430
ASPN	ENSG00000106819_202266.4	2849	209
ASPN	ENSG00000106819_202267.5	1655	497
ASPN	ENSG00000106819_202268.6	6710	1101
ASPN	ENSG00000106819_202269.7	4330	1274
ASPN	ENSG00000106819_202270.8	1703	330
ASPN	ENSG00000106819_202271.9	2601	454
ASPN	ENSG00000106819_202272.10	4267	442
ASXL2	ENSG00000143970_25236.1	1658	801
ASXL2	ENSG00000143970_25237.2	496	403
ASXL2	ENSG00000143970_25238.3	229	101
ASXL2	ENSG00000143970_25239.4	1359	494
ASXL2	ENSG00000143970_25240.5	1225	388
ASXL2	ENSG00000143970_25241.6	390	316
ASXL2	ENSG00000143970_25242.7	1032	147
ASXL2	ENSG00000143970_25243.8	751	131
ASXL2	ENSG00000143970_25244.9	1055	588
ASXL2	ENSG00000143970_25245.10	1232	70
ATL1	ENSG00000198513_196034.1	382	29
ATL1	ENSG00000198513_196035.2	931	189
ATL1	ENSG00000198513_196036.3	1034	187
ATL1	ENSG00000198513_196037.4	2084	634
ATL1	ENSG00000198513_196038.5	389	12
ATL1	ENSG00000198513_196039.6	1118	427
ATL1	ENSG00000198513_196040.7	3173	618
ATL1	ENSG00000198513_196041.8	531	20
ATL1	ENSG00000198513_196042.9	972	305
ATL1	ENSG00000198513_196043.10	1776	163
ATMIN	ENSG00000166454_65452.1	1079	490
ATMIN	ENSG00000166454_65453.2	613	303
ATMIN	ENSG00000166454_65454.3	287	193
ATMIN	ENSG00000166454_65455.4	3257	1198
ATMIN	ENSG00000166454_65456.5	492	117
ATMIN	ENSG00000166454_65457.6	2054	759
ATMIN	ENSG00000166454_65458.7	812	427
ATMIN	ENSG00000166454_65459.8	1850	471
ATMIN	ENSG00000166454_65460.9	909	249
ATMIN	ENSG00000166454_65461.10	165	97
ATP11C	ENSG00000101974_2286.1	205	0
ATP11C	ENSG00000101974_2287.2	1275	685
ATP11C	ENSG00000101974_2288.3	585	204
ATP11C	ENSG00000101974_2289.4	2471	690
ATP11C	ENSG00000101974_2290.5	1857	321
ATP11C	ENSG00000101974_2291.6	738	87
ATP11C	ENSG00000101974_2292.7	2940	546
ATP11C	ENSG00000101974_2293.8	2525	932
ATP11C	ENSG00000101974_2294.9	2467	507
ATP11C	ENSG00000101974_2295.10	2996	1273
ATP1B2	ENSG00000129244_41721.1	782	300
ATP1B2	ENSG00000129244_41722.2	4502	769
ATP1B2	ENSG00000129244_41723.3	761	356
ATP1B2	ENSG00000129244_41724.4	485	98
ATP1B2	ENSG00000129244_41725.5	1017	63
ATP1B2	ENSG00000129244_41726.6	2456	766
ATP1B2	ENSG00000129244_41727.7	1278	87
ATP1B2	ENSG00000129244_41728.8	436	8
ATP1B2	ENSG00000129244_41729.9	2514	468
ATP1B2	ENSG00000129244_41730.10	896	347
ATP2A2	ENSG00000174437_98289.1	61	1801
ATP2A2	ENSG00000174437_98290.2	17	213
ATP2A2	ENSG00000174437_98291.3	18	148
ATP2A2	ENSG00000174437_98292.4	163	4767
ATP2A2	ENSG00000174437_98293.5	294	145
ATP2A2	ENSG00000174437_98294.6	57	0
ATP2A2	ENSG00000174437_98295.7	238	7793
ATP2A2	ENSG00000174437_98296.8	208	5933
ATP2A2	ENSG00000174437_98297.9	201	4157
ATP2A2	ENSG00000174437_98298.10	291	1365
ATP2B2	ENSG00000157087_199260.1	1440	163
ATP2B2	ENSG00000157087_199262.3	1208	153
ATP2B2	ENSG00000157087_199263.4	603	47
ATP2B2	ENSG00000157087_199264.5	3133	739
ATP2B2	ENSG00000157087_199265.6	2585	880
ATP2B2	ENSG00000157087_199266.7	470	14
ATP2B2	ENSG00000157087_199267.8	3144	743
ATP2B2	ENSG00000157087_199268.9	540	0
ATP2B2	ENSG00000157087_199269.10	1447	432
ATP2B2	sgATP2B2_1	299	92
ATP6AP1	ENSG00000071553_182762.1	532	288
ATP6AP1	ENSG00000071553_182763.2	23	15
ATP6AP1	ENSG00000071553_182764.3	469	453
ATP6AP1	ENSG00000071553_182765.4	331	2772
ATP6AP1	ENSG00000071553_182766.5	844	715
ATP6AP1	ENSG00000071553_182767.6	179	411
ATP6AP1	ENSG00000071553_182768.7	280	5225
ATP6AP1	ENSG00000071553_182769.8	496	354
ATP6AP1	ENSG00000071553_182770.9	1106	10589
ATP6AP1	ENSG00000071553_182771.10	370	1016
ATP6AP2	ENSG00000182220_186726.1	2648	427
ATP6AP2	ENSG00000182220_186727.2	0	84
ATP6AP2	ENSG00000182220_186728.3	574	849
ATP6AP2	ENSG00000182220_186729.4	17	178
ATP6AP2	ENSG00000182220_186730.5	886	6
ATP6AP2	ENSG00000182220_186731.6	836	46
ATP6AP2	ENSG00000182220_186732.7	127	397
ATP6AP2	ENSG00000182220_186733.8	412	1261
ATP6AP2	ENSG00000182220_186734.9	230	402
ATP6AP2	ENSG00000182220_186735.10	1175	6487
ATP6C	ENSG00000259784_1029.1	619	73
ATP6C	ENSG00000259784_1030.2	1518	2169
ATP6C	ENSG00000259784_1031.3	1159	187
ATP6C	ENSG00000259784_1032.4	189	183
ATP6C	ENSG00000259784_1033.5	1935	609
ATP6C	ENSG00000259784_1034.6	588	101
ATP6C	ENSG00000259784_1035.7	685	150
ATP6C	ENSG00000259784_1036.8	259	382
ATP6C	ENSG00000259784_1037.9	170	0
ATP6C	ENSG00000259784_1038.10	117	465
ATP6V0B	ENSG00000117410_62935.1	0	0
ATP6V0B	ENSG00000117410_62936.2	402	2543
ATP6V0B	ENSG00000117410_62937.3	198	192
ATP6V0B	ENSG00000117410_62938.4	1008	518
ATP6V0B	ENSG00000117410_62939.5	116	98
ATP6V0B	ENSG00000117410_62940.6	29	0
ATP6V0B	ENSG00000117410_62941.7	869	298
ATP6V0B	ENSG00000117410_62942.8	309	19
ATP6V0B	ENSG00000117410_62943.9	29	146
ATP6V0B	ENSG00000117410_62944.10	298	69
ATP6V0D1	ENSG00000159720_146372.1	593	1641
ATP6V0D1	ENSG00000159720_146373.2	137	1166
ATP6V0D1	ENSG00000159720_146374.3	4	10
ATP6V0D1	ENSG00000159720_146375.4	489	747
ATP6V0D1	ENSG00000159720_146376.5	0	6
ATP6V0D1	ENSG00000159720_146377.6	81	693
ATP6V0D1	ENSG00000159720_146378.7	184	51
ATP6V0D1	ENSG00000159720_146379.8	67	56
ATP6V0D1	ENSG00000159720_146380.9	1363	545
ATP6V0D1	ENSG00000159720_146381.10	694	124
ATP6V0E1	ENSG00000113732_151211.1	468	25
ATP6V0E1	ENSG00000113732_151212.2	128	584
ATP6V0E1	ENSG00000113732_151213.3	1351	1315
ATP6V0E1	ENSG00000113732_151214.4	227	183
ATP6V0E1	ENSG00000113732_151215.5	40	211
ATP6V0E1	ENSG00000113732_151216.6	108	162
ATP6V0E1	ENSG00000113732_151217.7	478	1451
ATP6V0E1	ENSG00000113732_151218.8	463	565
ATP6V0E1	ENSG00000113732_151219.9	1593	343
ATP6V0E1	ENSG00000113732_151220.10	193	364
ATP6V1A	ENSG00000114573_89215.1	40	150
ATP6V1A	ENSG00000114573_89216.2	222	216
ATP6V1A	ENSG00000114573_89217.3	194	9
ATP6V1A	ENSG00000114573_89218.4	508	1352
ATP6V1A	ENSG00000114573_89219.5	38	0
ATP6V1A	ENSG00000114573_89220.6	537	651
ATP6V1A	ENSG00000114573_89221.7	268	739
ATP6V1A	ENSG00000114573_89222.8	167	689
ATP6V1A	ENSG00000114573_89223.9	637	612
ATP6V1A	ENSG00000114573_89224.10	1836	6543
ATP6V1B2	ENSG00000147416_171788.1	612	464
ATP6V1B2	ENSG00000147416_171789.2	157	438
ATP6V1B2	ENSG00000147416_171791.4	1513	1483
ATP6V1B2	ENSG00000147416_171792.5	285	285
ATP6V1B2	ENSG00000147416_171793.6	100	182
ATP6V1B2	ENSG00000147416_171794.7	6	23
ATP6V1B2	ENSG00000147416_171795.8	49	66
ATP6V1B2	ENSG00000147416_171796.9	66	1482
ATP6V1B2	ENSG00000147416_171797.10	537	3269
ATP6V1B2	sgATP6V1B2_1	1517	2608
ATP6V1D	ENSG00000100554_48271.1	2219	788
ATP6V1D	ENSG00000100554_48272.2	90	13
ATP6V1D	ENSG00000100554_48273.3	818	1710
ATP6V1D	ENSG00000100554_48274.4	351	239
ATP6V1D	ENSG00000100554_48275.5	20	0
ATP6V1D	ENSG00000100554_48276.6	137	1509
ATP6V1D	ENSG00000100554_48277.7	51	161
ATP6V1D	ENSG00000100554_48278.8	56	673
ATP6V1D	ENSG00000100554_48279.9	192	4056
ATP6V1D	ENSG00000100554_48280.10	27	86
ATP6V1F	ENSG00000128524_123485.1	0	0
ATP6V1F	ENSG00000128524_123486.2	203	919
ATP6V1F	ENSG00000128524_123487.3	23	152
ATP6V1F	ENSG00000128524_123488.4	528	1211
ATP6V1F	ENSG00000128524_123489.5	363	179
ATP6V1F	ENSG00000128524_123490.6	960	960
ATP6V1F	ENSG00000128524_123491.7	472	405
ATP6V1F	ENSG00000128524_123494.10	147	168
ATP6V1F	sgATP6V1F_1	253	78
ATP6V1F	sgATP6V1F_3	75	275
ATP6V1G1	ENSG00000136888_157996.1	20	26
ATP6V1G1	ENSG00000136888_157997.2	25	238
ATP6V1G1	ENSG00000136888_157998.3	307	247
ATP6V1G1	ENSG00000136888_157999.4	657	505
ATP6V1G1	ENSG00000136888_158000.5	379	2912
ATP6V1G1	ENSG00000136888_158001.6	75	194
ATP6V1G1	ENSG00000136888_158002.7	3	0
ATP6V1G1	ENSG00000136888_158003.8	94	236
ATP6V1G1	ENSG00000136888_158004.9	933	388
ATP6V1G1	ENSG00000136888_158005.10	562	312
ATP6V1H	ENSG00000047249_68709.1	480	3547
ATP6V1H	ENSG00000047249_68710.2	433	9222
ATP6V1H	ENSG00000047249_68711.3	625	1720
ATP6V1H	ENSG00000047249_68712.4	2078	562
ATP6V1H	ENSG00000047249_68713.5	355	9223
ATP6V1H	ENSG00000047249_68714.6	511	92
ATP6V1H	ENSG00000047249_68715.7	270	268
ATP6V1H	ENSG00000047249_68716.8	167	1984
ATP6V1H	ENSG00000047249_68717.9	562	2482
ATP6V1H	ENSG00000047249_68718.10	50	7
ATP7B	ENSG00000123191_189487.1	892	197
ATP7B	ENSG00000123191_189488.2	2222	332
ATP7B	ENSG00000123191_189489.3	2156	331
ATP7B	ENSG00000123191_189490.4	1188	284
ATP7B	ENSG00000123191_189491.5	2791	550
ATP7B	ENSG00000123191_189492.6	3303	528
ATP7B	ENSG00000123191_189493.7	628	45
ATP7B	ENSG00000123191_189494.8	2568	504
ATP7B	ENSG00000123191_189495.9	394	589
ATP7B	ENSG00000123191_189496.10	981	352
ATP9B	ENSG00000166377_134953.1	461	208
ATP9B	ENSG00000166377_134954.2	624	146
ATP9B	ENSG00000166377_134955.3	1082	139
ATP9B	ENSG00000166377_134956.4	4735	937
ATP9B	ENSG00000166377_134957.5	629	147
ATP9B	ENSG00000166377_134958.6	633	257
ATP9B	ENSG00000166377_134959.7	2468	841
ATP9B	ENSG00000166377_134960.8	2201	421
ATP9B	ENSG00000166377_134961.9	1039	386
ATP9B	ENSG00000166377_134962.10	2740	342
B3GALNT2	ENSG00000162885_180954.1	1405	372
B3GALNT2	ENSG00000162885_180955.2	735	79
B3GALNT2	ENSG00000162885_180956.3	625	3
B3GALNT2	ENSG00000162885_180957.4	1320	274
B3GALNT2	ENSG00000162885_180958.5	1628	620
B3GALNT2	ENSG00000162885_180959.6	2129	236
B3GALNT2	ENSG00000162885_180960.7	1143	236
B3GALNT2	ENSG00000162885_180961.8	1582	178
B3GALNT2	ENSG00000162885_180962.9	2311	701
B3GALNT2	ENSG00000162885_180963.10	1369	308
B9D2	ENSG00000123810_52890.1	569	128
B9D2	ENSG00000123810_52891.2	758	117
B9D2	ENSG00000123810_52892.3	248	83
B9D2	ENSG00000123810_52893.4	751	112
B9D2	ENSG00000123810_52894.5	2391	292
B9D2	ENSG00000123810_52895.6	1865	266
B9D2	ENSG00000123810_52896.7	660	95
B9D2	ENSG00000123810_52897.8	455	87
B9D2	ENSG00000123810_52898.9	1007	237
B9D2	ENSG00000123810_52899.10	950	147
BAK1	ENSG00000030110_183082.1	798	379
BAK1	ENSG00000030110_183083.2	723	50
BAK1	ENSG00000030110_183084.3	500	113
BAK1	ENSG00000030110_183085.4	2972	703
BAK1	ENSG00000030110_183086.5	877	376
BAK1	ENSG00000030110_183087.6	868	66
BAK1	ENSG00000030110_183088.7	304	44
BAK1	ENSG00000030110_183089.8	1190	188
BAK1	ENSG00000030110_183090.9	1263	396
BAK1	ENSG00000030110_183091.10	633	201
BAP1	ENSG00000163930_189759.1	843	504
BAP1	ENSG00000163930_189761.3	611	508
BAP1	ENSG00000163930_189762.4	155	219
BAP1	ENSG00000163930_189763.5	517	249
BAP1	ENSG00000163930_189764.6	635	265
BAP1	ENSG00000163930_189765.7	172	133
BAP1	ENSG00000163930_189766.8	446	225
BAP1	ENSG00000163930_189767.9	585	512
BAP1	ENSG00000163930_189768.10	436	218
BAP1	sgBAP1_1	72	69
BAZ1A	ENSG00000198604_79834.1	611	34
BAZ1A	ENSG00000198604_79835.2	1098	242
BAZ1A	ENSG00000198604_79836.3	1215	154
BAZ1A	ENSG00000198604_79837.4	2137	240
BAZ1A	ENSG00000198604_79838.5	558	40
BAZ1A	ENSG00000198604_79839.6	619	135
BAZ1A	ENSG00000198604_79840.7	2008	576
BAZ1A	ENSG00000198604_79841.8	1271	25
BAZ1A	ENSG00000198604_79842.9	667	24
BAZ1A	ENSG00000198604_79843.10	2153	684
BBS9	ENSG00000122507_197480.1	2583	648
BBS9	ENSG00000122507_197481.2	2576	326
BBS9	ENSG00000122507_197483.4	3968	788
BBS9	ENSG00000122507_197484.5	636	248
BBS9	ENSG00000122507_197485.6	1729	402
BBS9	ENSG00000122507_197486.7	521	321
BBS9	ENSG00000122507_197487.8	2201	674
BBS9	ENSG00000122507_197488.9	381	123
BBS9	ENSG00000122507_197489.10	1545	508
BBS9	sgBBS9_1	322	133
BCKDHA	ENSG00000248098_195291.1	1418	265
BCKDHA	ENSG00000248098_195292.2	1547	193
BCKDHA	ENSG00000248098_195293.3	1071	227
BCKDHA	ENSG00000248098_195294.4	2164	605
BCKDHA	ENSG00000248098_195295.5	1532	92
BCKDHA	ENSG00000248098_195296.6	1136	155
BCKDHA	ENSG00000248098_195297.7	912	132
BCKDHA	ENSG00000248098_195298.8	1797	177
BCKDHA	ENSG00000248098_195299.9	454	340
BCKDHA	ENSG00000248098_195300.10	121	62
BCKDK	ENSG00000103507_21714.1	580	33
BCKDK	ENSG00000103507_21715.2	249	0
BCKDK	ENSG00000103507_21716.3	384	30
BCKDK	ENSG00000103507_21717.4	839	245
BCKDK	ENSG00000103507_21718.5	565	133
BCKDK	ENSG00000103507_21719.6	607	87
BCKDK	ENSG00000103507_21720.7	434	109
BCKDK	ENSG00000103507_21721.8	2768	157
BCKDK	ENSG00000103507_21722.9	458	99
BCKDK	ENSG00000103507_21723.10	676	0
BCL2L15	ENSG00000188761_35945.1	2200	548
BCL2L15	ENSG00000188761_35946.2	1176	116
BCL2L15	ENSG00000188761_35947.3	1472	346
BCL2L15	ENSG00000188761_35948.4	1051	284
BCL2L15	ENSG00000188761_35949.5	939	243
BCL2L15	ENSG00000188761_35950.6	655	533
BCL2L15	ENSG00000188761_35951.7	1291	478
BCL2L15	ENSG00000188761_35952.8	235	0
BCL2L15	ENSG00000188761_35953.9	1041	139
BCL2L15	ENSG00000188761_35954.10	576	95
BECN1	ENSG00000126581_47660.1	931	2720
BECN1	ENSG00000126581_47661.2	529	1132
BECN1	ENSG00000126581_47662.3	354	1105
BECN1	ENSG00000126581_47663.4	1750	1626
BECN1	ENSG00000126581_47664.5	392	5348
BECN1	ENSG00000126581_47665.6	1094	6765
BECN1	ENSG00000126581_47666.7	2693	9098
BECN1	ENSG00000126581_47667.8	1889	1048
BECN1	ENSG00000126581_47668.9	76	63
BECN1	ENSG00000126581_47669.10	1544	156
BHLHE22	ENSG00000180828_23259.1	237	94
BHLHE22	ENSG00000180828_23260.2	242	54
BHLHE22	ENSG00000180828_23261.3	687	398
BHLHE22	ENSG00000180828_23262.4	722	303
BHLHE22	ENSG00000180828_23263.5	710	62
BHLHE22	ENSG00000180828_23264.6	505	85
BHLHE22	ENSG00000180828_23265.7	384	93
BHLHE22	ENSG00000180828_23266.8	1861	296
BHLHE22	ENSG00000180828_23267.9	816	321
BHLHE22	ENSG00000180828_23268.10	791	61
BIN3	ENSG00000147439_170591.1	1784	332
BIN3	ENSG00000147439_170592.2	3390	890
BIN3	ENSG00000147439_170593.3	2616	830
BIN3	ENSG00000147439_170594.4	1595	440
BIN3	ENSG00000147439_170595.5	375	14
BIN3	ENSG00000147439_170596.6	327	299
BIN3	ENSG00000147439_170597.7	260	102
BIN3	ENSG00000147439_170598.8	1152	125
BIN3	ENSG00000147439_170599.9	1918	831
BIN3	ENSG00000147439_170600.10	777	272
BIRC6	ENSG00000115760_79930.1	746	74
BIRC6	ENSG00000115760_79931.2	418	54
BIRC6	ENSG00000115760_79932.3	1758	265
BIRC6	ENSG00000115760_79933.4	799	170
BIRC6	ENSG00000115760_79934.5	292	27
BIRC6	ENSG00000115760_79935.6	903	205
BIRC6	ENSG00000115760_79936.7	273	19
BIRC6	ENSG00000115760_79937.8	667	100
BIRC6	ENSG00000115760_79938.9	1423	430
BIRC6	ENSG00000115760_79939.10	1024	428
BLMH	ENSG00000108578_29629.1	804	254
BLMH	ENSG00000108578_29630.2	1723	205
BLMH	ENSG00000108578_29631.3	914	46
BLMH	ENSG00000108578_29632.4	1540	124
BLMH	ENSG00000108578_29633.5	1642	473
BLMH	ENSG00000108578_29634.6	1872	253
BLMH	ENSG00000108578_29635.7	1457	467
BLMH	ENSG00000108578_29636.8	2032	598
BLMH	ENSG00000108578_29637.9	1262	242
BLMH	ENSG00000108578_29638.10	1172	340
BLOC1S2	ENSG00000196072_83892.1	1674	1652
BLOC1S2	ENSG00000196072_83893.2	556	31
BLOC1S2	ENSG00000196072_83894.3	419	334
BLOC1S2	ENSG00000196072_83895.4	567	73
BLOC1S2	ENSG00000196072_83896.5	972	298
BLOC1S2	ENSG00000196072_83897.6	586	275
BLOC1S2	ENSG00000196072_83898.7	1438	636
BLOC1S2	ENSG00000196072_83899.8	204	184
BLOC1S2	ENSG00000196072_83900.9	1615	125
BLOC1S2	ENSG00000196072_83901.10	1295	1285
BMP1	ENSG00000168487_133683.1	751	336
BMP1	ENSG00000168487_133684.2	739	35
BMP1	ENSG00000168487_133685.3	385	329
BMP1	ENSG00000168487_133686.4	4444	1262
BMP1	ENSG00000168487_133687.5	242	49
BMP1	ENSG00000168487_133688.6	709	433
BMP1	ENSG00000168487_133689.7	438	194
BMP1	ENSG00000168487_133690.8	851	270
BMP1	ENSG00000168487_133691.9	644	0
BMP1	ENSG00000168487_133692.10	347	181
BMP3	ENSG00000152785_78906.1	540	26
BMP3	ENSG00000152785_78907.2	626	84
BMP3	ENSG00000152785_78908.3	1096	122
BMP3	ENSG00000152785_78909.4	833	177
BMP3	ENSG00000152785_78910.5	1884	554
BMP3	ENSG00000152785_78911.6	1026	175
BMP3	ENSG00000152785_78912.7	3589	701
BMP3	ENSG00000152785_78913.8	2498	564
BMP3	ENSG00000152785_78914.9	3282	953
BMP3	ENSG00000152785_78915.10	1290	249
BNC1	ENSG00000169594_10353.1	1009	251
BNC1	ENSG00000169594_10354.2	489	0
BNC1	ENSG00000169594_10355.3	1468	188
BNC1	ENSG00000169594_10356.4	520	96
BNC1	ENSG00000169594_10357.5	1670	331
BNC1	ENSG00000169594_10358.6	2473	517
BNC1	ENSG00000169594_10359.7	1675	245
BNC1	ENSG00000169594_10360.8	787	0
BNC1	ENSG00000169594_10361.9	642	247
BNC1	ENSG00000169594_10362.10	2043	515
BNIP3L	ENSG00000104765_168906.1	1510	377
BNIP3L	ENSG00000104765_168907.2	1279	583
BNIP3L	ENSG00000104765_168908.3	888	187
BNIP3L	ENSG00000104765_168909.4	909	32
BNIP3L	ENSG00000104765_168910.5	770	281
BNIP3L	ENSG00000104765_168911.6	935	407
BNIP3L	ENSG00000104765_168912.7	54	49
BNIP3L	ENSG00000104765_168913.8	1775	327
BNIP3L	ENSG00000104765_168914.9	3023	1008
BNIP3L	ENSG00000104765_168915.10	5215	1326
BPNT1	ENSG00000162813_110878.1	437	29
BPNT1	ENSG00000162813_110879.2	1975	349
BPNT1	ENSG00000162813_110880.3	407	0
BPNT1	ENSG00000162813_110881.4	1095	123
BPNT1	ENSG00000162813_110882.5	1528	311
BPNT1	ENSG00000162813_110883.6	1371	287
BPNT1	ENSG00000162813_110884.7	1247	235
BPNT1	ENSG00000162813_110885.8	1790	312
BPNT1	ENSG00000162813_110886.9	868	50
BPNT1	ENSG00000162813_110887.10	2268	760
BTK	ENSG00000010671_164324.1	1142	123
BTK	ENSG00000010671_164325.2	1240	298
BTK	ENSG00000010671_164326.3	904	236
BTK	ENSG00000010671_164327.4	1196	319
BTK	ENSG00000010671_164328.5	2969	439
BTK	ENSG00000010671_164329.6	1911	325
BTK	ENSG00000010671_164330.7	2150	667
BTK	ENSG00000010671_164331.8	1533	243
BTK	ENSG00000010671_164332.9	1089	304
BTK	ENSG00000010671_164333.10	3208	1284
BZW2	ENSG00000136261_96603.1	1220	60
BZW2	ENSG00000136261_96604.2	1940	167
BZW2	ENSG00000136261_96605.3	2736	598
BZW2	ENSG00000136261_96606.4	2347	252
BZW2	ENSG00000136261_96607.5	778	89
BZW2	ENSG00000136261_96608.6	3509	891
BZW2	ENSG00000136261_96609.7	1653	425
BZW2	ENSG00000136261_96610.8	2141	650
BZW2	ENSG00000136261_96611.9	4123	1127
BZW2	ENSG00000136261_96612.10	0	0
C11orf49	ENSG00000149179_86113.1	607	0
C11orf49	ENSG00000149179_86114.2	742	104
C11orf49	ENSG00000149179_86115.3	1037	175
C11orf49	ENSG00000149179_86116.4	405	44
C11orf49	ENSG00000149179_86117.5	713	102
C11orf49	ENSG00000149179_86118.6	952	333
C11orf49	ENSG00000149179_86119.7	1320	310
C11orf49	ENSG00000149179_86120.8	111	31
C11orf49	ENSG00000149179_86121.9	956	274
C11orf49	ENSG00000149179_86122.10	1037	218
C11orf53	ENSG00000150750_113080.1	741	391
C11orf53	ENSG00000150750_113081.2	1460	364
C11orf53	ENSG00000150750_113082.3	1399	264
C11orf53	ENSG00000150750_113083.4	126	0
C11orf53	ENSG00000150750_113084.5	984	359
C11orf53	ENSG00000150750_113085.6	283	72
C11orf53	ENSG00000150750_113086.7	2332	495
C11orf53	ENSG00000150750_113087.8	1188	281
C11orf53	ENSG00000150750_113088.9	1796	753
C11orf53	ENSG00000150750_113089.10	947	247
C11orf87	ENSG00000185742_138965.1	558	93
C11orf87	ENSG00000185742_138966.2	458	270
C11orf87	ENSG00000185742_138967.3	389	19
C11orf87	ENSG00000185742_138968.4	793	116
C11orf87	ENSG00000185742_138969.5	2549	561
C11orf87	ENSG00000185742_138970.6	1805	527
C11orf87	ENSG00000185742_138971.7	602	182
C11orf87	ENSG00000185742_138972.8	505	109
C11orf87	ENSG00000185742_138973.9	2514	339
C11orf87	ENSG00000185742_138974.10	518	72
C12orf45	ENSG00000151131_34224.1	420	240
C12orf45	ENSG00000151131_34225.2	139	0
C12orf45	ENSG00000151131_34226.3	113	12
C12orf45	ENSG00000151131_34227.4	2681	699
C12orf45	ENSG00000151131_34228.5	144	61
C12orf45	ENSG00000151131_34229.6	797	170
C12orf45	ENSG00000151131_34230.7	239	46
C12orf45	ENSG00000151131_34231.8	1528	266
C12orf45	ENSG00000151131_34232.9	1361	106
C12orf45	ENSG00000151131_34233.10	710	139
C15orf37	ENSG00000259642_179175.1	1662	529
C15orf37	ENSG00000259642_179176.2	889	198
C15orf37	ENSG00000259642_179177.3	197	43
C15orf37	ENSG00000259642_179178.4	963	203
C15orf37	ENSG00000259642_179179.5	1584	352
C15orf37	ENSG00000259642_179180.6	345	34
C15orf37	ENSG00000259642_179181.7	572	224
C15orf37	ENSG00000259642_179182.8	411	53
C15orf37	ENSG00000259642_179183.9	872	184
C15orf37	ENSG00000259642_179184.10	179	32
C15orf43	ENSG00000167014_190070.1	573	206
C15orf43	ENSG00000167014_190071.2	552	117
C15orf43	ENSG00000167014_190072.3	438	140
C15orf43	ENSG00000167014_190073.4	323	146
C15orf43	ENSG00000167014_190074.5	384	97
C15orf43	ENSG00000167014_190075.6	3027	436
C15orf43	ENSG00000167014_190076.7	3155	927
C15orf43	ENSG00000167014_190077.8	681	129
C15orf43	ENSG00000167014_190078.9	616	45
C15orf43	ENSG00000167014_190079.10	874	192
C15orf52	ENSG00000188549_104827.1	184	3
C15orf52	ENSG00000188549_104828.2	454	0
C15orf52	ENSG00000188549_104829.3	405	66
C15orf52	ENSG00000188549_104830.4	788	79
C15orf52	ENSG00000188549_104831.5	418	187
C15orf52	ENSG00000188549_104832.6	631	203
C15orf52	ENSG00000188549_104833.7	264	46
C15orf52	ENSG00000188549_104834.8	367	28
C15orf52	ENSG00000188549_104835.9	174	19
C15orf52	ENSG00000188549_104836.10	905	101
C15orf57	ENSG00000128891_83376.1	2589	834
C15orf57	ENSG00000128891_83377.2	316	210
C15orf57	ENSG00000128891_83378.3	415	118
C15orf57	ENSG00000128891_83379.4	519	16
C15orf57	ENSG00000128891_83380.5	1825	196
C15orf57	ENSG00000128891_83381.6	594	0
C15orf57	ENSG00000128891_83382.7	417	148
C15orf57	ENSG00000128891_83383.8	414	367
C15orf57	ENSG00000128891_83384.9	663	42
C15orf57	ENSG00000128891_83385.10	1468	641
C15orf59	ENSG00000205363_30447.1	1584	230
C15orf59	ENSG00000205363_30448.2	265	0
C15orf59	ENSG00000205363_30449.3	695	370
C15orf59	ENSG00000205363_30450.4	5068	1176
C15orf59	ENSG00000205363_30452.6	354	105
C15orf59	ENSG00000205363_30453.7	599	535
C15orf59	ENSG00000205363_30454.8	2260	363
C15orf59	ENSG00000205363_30455.9	786	268
C15orf59	ENSG00000205363_30456.10	1200	96
C15orf59	sgC15orf59_1	485	187
C16orf78	ENSG00000166152_179385.1	2318	326
C16orf78	ENSG00000166152_179386.2	630	174
C16orf78	ENSG00000166152_179387.3	653	144
C16orf78	ENSG00000166152_179388.4	698	104
C16orf78	ENSG00000166152_179389.5	356	236
C16orf78	ENSG00000166152_179390.6	2041	432
C16orf78	ENSG00000166152_179391.7	536	44
C16orf78	ENSG00000166152_179392.8	1551	270
C16orf78	ENSG00000166152_179393.9	2608	792
C16orf78	ENSG00000166152_179394.10	3504	605
C16orf96	ENSG00000205832_27865.1	615	164
C16orf96	ENSG00000205832_27866.2	685	109
C16orf96	ENSG00000205832_27867.3	797	98
C16orf96	ENSG00000205832_27868.4	840	231
C16orf96	ENSG00000205832_27869.5	330	123
C16orf96	ENSG00000205832_27870.6	891	432
C16orf96	ENSG00000205832_27871.7	720	152
C16orf96	ENSG00000205832_27872.8	682	317
C16orf96	ENSG00000205832_27873.9	871	216
C16orf96	ENSG00000205832_27874.10	388	29
C17orf107	ENSG00000205710_104037.1	301	25
C17orf107	ENSG00000205710_104038.2	590	98
C17orf107	ENSG00000205710_104040.4	1154	321
C17orf107	ENSG00000205710_104041.5	1158	189
C17orf107	ENSG00000205710_104042.6	802	79
C17orf107	ENSG00000205710_104043.7	781	211
C17orf107	ENSG00000205710_104044.8	1199	245
C17orf107	ENSG00000205710_104045.9	1100	149
C17orf107	ENSG00000205710_104046.10	666	90
C17orf107	sgC17orf107_1	1332	286
C17orf51	ENSG00000212719_33934.1	317	109
C17orf51	ENSG00000212719_33935.2	1501	574
C17orf51	ENSG00000212719_33936.3	27	0
C17orf51	ENSG00000212719_33937.4	888	249
C17orf51	ENSG00000212719_33938.5	287	71
C17orf51	ENSG00000212719_33939.6	357	257
C17orf51	ENSG00000212719_33940.7	2125	525
C17orf51	ENSG00000212719_33941.8	923	685
C17orf51	ENSG00000212719_33942.9	923	272
C17orf51	sgC17orf51_1	304	132
C17orf53	ENSG00000125319_105477.1	309	80
C17orf53	ENSG00000125319_105478.2	751	188
C17orf53	ENSG00000125319_105479.3	918	157
C17orf53	ENSG00000125319_105480.4	1730	178
C17orf53	ENSG00000125319_105481.5	632	284
C17orf53	ENSG00000125319_105482.6	272	0
C17orf53	ENSG00000125319_105483.7	778	190
C17orf53	ENSG00000125319_105484.8	603	123
C17orf53	ENSG00000125319_105485.9	523	56
C17orf53	ENSG00000125319_105486.10	5049	973
C18orf8	ENSG00000141452_75709.1	1639	816
C18orf8	ENSG00000141452_75710.2	766	303
C18orf8	ENSG00000141452_75711.3	946	463
C18orf8	ENSG00000141452_75712.4	3269	2714
C18orf8	ENSG00000141452_75713.5	640	445
C18orf8	ENSG00000141452_75714.6	687	579
C18orf8	ENSG00000141452_75715.7	1310	507
C18orf8	ENSG00000141452_75716.8	585	466
C18orf8	ENSG00000141452_75717.9	768	1191
C18orf8	ENSG00000141452_75718.10	962	1659
C19orf25	ENSG00000119559_97263.1	168	1176
C19orf25	ENSG00000119559_97264.2	171	307
C19orf25	ENSG00000119559_97265.3	323	449
C19orf25	ENSG00000119559_97266.4	2607	1281
C19orf25	ENSG00000119559_97267.5	333	312
C19orf25	ENSG00000119559_97268.6	430	515
C19orf25	ENSG00000119559_97269.7	198	325
C19orf25	ENSG00000119559_97270.8	110	264
C19orf25	ENSG00000119559_97271.9	507	58
C19orf25	ENSG00000119559_97272.10	272	995
C19orf55	ENSG00000167595_24966.1	425	0
C19orf55	ENSG00000167595_24967.2	776	529
C19orf55	ENSG00000167595_24968.3	2103	648
C19orf55	ENSG00000167595_24969.4	361	0
C19orf55	ENSG00000167595_24970.5	551	178
C19orf55	ENSG00000167595_24971.6	1722	483
C19orf55	ENSG00000167595_24972.7	348	2
C19orf55	ENSG00000167595_24973.8	912	243
C19orf55	ENSG00000167595_24974.9	515	79
C19orf55	ENSG00000167595_24975.10	749	107
C1GALT1C1	ENSG00000171155_188989.1	1229	1005
C1GALT1C1	ENSG00000171155_188990.2	2102	1345
C1GALT1C1	ENSG00000171155_188991.3	1898	469
C1GALT1C1	ENSG00000171155_188992.4	423	111
C1GALT1C1	ENSG00000171155_188993.5	1485	676
C1GALT1C1	ENSG00000171155_188994.6	2464	720
C1GALT1C1	ENSG00000171155_188995.7	1931	1104
C1GALT1C1	ENSG00000171155_188996.8	3669	1600
C1GALT1C1	ENSG00000171155_188997.9	1692	522
C1GALT1C1	ENSG00000171155_188998.10	1298	138
C1GALT1	ENSG00000106392_48838.1	1262	308
C1GALT1	ENSG00000106392_48839.2	921	112
C1GALT1	ENSG00000106392_48840.3	1683	925
C1GALT1	ENSG00000106392_48841.4	1888	958
C1GALT1	ENSG00000106392_48842.5	951	507
C1GALT1	ENSG00000106392_48843.6	2137	1065
C1GALT1	ENSG00000106392_48844.7	1104	333
C1GALT1	ENSG00000106392_48845.8	628	517
C1GALT1	ENSG00000106392_48846.9	539	185
C1GALT1	ENSG00000106392_48847.10	2009	374
C1orf106	ENSG00000163362_118076.1	499	40
C1orf106	ENSG00000163362_118077.2	288	254
C1orf106	ENSG00000163362_118078.3	502	291
C1orf106	ENSG00000163362_118079.4	514	79
C1orf106	ENSG00000163362_118080.5	206	16
C1orf106	ENSG00000163362_118081.6	676	101
C1orf106	ENSG00000163362_118082.7	140	8
C1orf106	ENSG00000163362_118083.8	349	0
C1orf106	ENSG00000163362_118084.9	330	0
C1orf106	ENSG00000163362_118085.10	547	2
C1orf116	ENSG00000182795_179345.1	1097	76
C1orf116	ENSG00000182795_179346.2	860	212
C1orf116	ENSG00000182795_179347.3	1016	737
C1orf116	ENSG00000182795_179348.4	995	179
C1orf116	ENSG00000182795_179349.5	652	52
C1orf116	ENSG00000182795_179350.6	538	8
C1orf116	ENSG00000182795_179351.7	806	41
C1orf116	ENSG00000182795_179352.8	2200	339
C1orf116	ENSG00000182795_179353.9	202	0
C1orf116	ENSG00000182795_179354.10	2631	624
C1orf141	ENSG00000203963_139942.1	271	293
C1orf141	ENSG00000203963_139943.2	773	709
C1orf141	ENSG00000203963_139944.3	581	87
C1orf141	ENSG00000203963_139945.4	592	126
C1orf141	ENSG00000203963_139946.5	3309	385
C1orf141	ENSG00000203963_139947.6	1160	267
C1orf141	ENSG00000203963_139948.7	4352	1283
C1orf141	ENSG00000203963_139949.8	1659	440
C1orf141	ENSG00000203963_139950.9	1905	501
C1orf141	ENSG00000203963_139951.10	1845	568
C2CD5	ENSG00000111731_166011.1	1379	211
C2CD5	ENSG00000111731_166012.2	2317	853
C2CD5	ENSG00000111731_166013.3	1628	274
C2CD5	ENSG00000111731_166014.4	2831	660
C2CD5	ENSG00000111731_166015.5	3932	770
C2CD5	ENSG00000111731_166016.6	1092	297
C2CD5	ENSG00000111731_166017.7	4975	1131
C2CD5	ENSG00000111731_166018.8	3772	935
C2CD5	ENSG00000111731_166019.9	3294	760
C2CD5	ENSG00000111731_166020.10	4420	901
C4orf51	ENSG00000237136_186357.1	622	209
C4orf51	ENSG00000237136_186358.2	3193	534
C4orf51	ENSG00000237136_186359.3	1429	310
C4orf51	ENSG00000237136_186360.4	1385	710
C4orf51	ENSG00000237136_186361.5	3768	858
C4orf51	ENSG00000237136_186362.6	2512	1138
C4orf51	ENSG00000237136_186363.7	601	223
C4orf51	ENSG00000237136_186364.8	2132	519
C4orf51	ENSG00000237136_186365.9	2180	474
C4orf51	ENSG00000237136_186366.10	1727	630
C5orf17	ENSG00000248874_109830.1	733	60
C5orf17	ENSG00000248874_109831.2	1792	141
C5orf17	ENSG00000248874_109832.3	349	57
C5orf17	ENSG00000248874_109833.4	1659	455
C5orf17	ENSG00000248874_109834.5	733	94
C5orf17	ENSG00000248874_109835.6	1962	509
C5orf17	ENSG00000248874_109836.7	259	83
C5orf17	ENSG00000248874_109837.8	1544	281
C5orf17	ENSG00000248874_109838.9	2263	354
C5orf17	ENSG00000248874_109839.10	55	0
C5orf63	ENSG00000164241_204001.1	568	13
C5orf63	ENSG00000164241_204003.3	771	171
C5orf63	ENSG00000164241_204004.4	647	132
C5orf63	ENSG00000164241_204006.6	2679	378
C5orf63	ENSG00000164241_204007.7	2031	89
C5orf63	ENSG00000164241_204008.8	2033	510
C5orf63	ENSG00000164241_204009.9	1271	46
C5orf63	ENSG00000164241_204010.10	1584	381
C5orf63	sgC5orf63_1	595	96
C5orf63	sgC5orf63_2	0	0
C6orf195	ENSG00000164385_30751.1	1032	149
C6orf195	ENSG00000164385_30752.2	246	0
C6orf195	ENSG00000164385_30753.3	2278	927
C6orf195	ENSG00000164385_30754.4	1336	365
C6orf195	ENSG00000164385_30755.5	647	180
C6orf195	ENSG00000164385_30756.6	1174	106
C6orf195	ENSG00000164385_30757.7	1637	342
C6orf195	ENSG00000164385_30758.8	790	129
C6orf195	ENSG00000164385_30759.9	787	836
C6orf195	ENSG00000164385_30760.10	448	282
C6orf47	ENSG00000204439_197120.1	935	153
C6orf47	ENSG00000204439_197121.2	357	39
C6orf47	ENSG00000204439_197122.3	356	38
C6orf47	ENSG00000204439_197123.4	1034	371
C6orf47	ENSG00000204439_197124.5	387	104
C6orf47	ENSG00000204439_197125.6	529	0
C6orf47	ENSG00000204439_197126.7	425	0
C6orf47	ENSG00000204439_197127.8	478	180
C6orf47	ENSG00000204439_197128.9	663	111
C6orf47	ENSG00000204439_197129.10	436	137
C8orf37	ENSG00000156172_159383.1	760	111
C8orf37	ENSG00000156172_159384.2	662	86
C8orf37	ENSG00000156172_159385.3	474	126
C8orf37	ENSG00000156172_159386.4	776	383
C8orf37	ENSG00000156172_159387.5	1104	24
C8orf37	ENSG00000156172_159388.6	1260	108
C8orf37	ENSG00000156172_159389.7	1981	899
C8orf37	ENSG00000156172_159390.8	2091	385
C8orf37	ENSG00000156172_159391.9	722	198
C8orf37	ENSG00000156172_159392.10	1973	573
C8orf58	ENSG00000241852_96143.1	1589	714
C8orf58	ENSG00000241852_96144.2	772	107
C8orf58	ENSG00000241852_96145.3	298	8
C8orf58	ENSG00000241852_96146.4	602	36
C8orf58	ENSG00000241852_96147.5	121	7
C8orf58	ENSG00000241852_96148.6	904	89
C8orf58	ENSG00000241852_96149.7	1542	248
C8orf58	ENSG00000241852_96150.8	371	139
C8orf58	ENSG00000241852_96151.9	178	108
C8orf58	ENSG00000241852_96152.10	1232	797
C8orf86	ENSG00000196166_138506.1	294	0
C8orf86	ENSG00000196166_138507.2	615	77
C8orf86	ENSG00000196166_138508.3	2674	547
C8orf86	ENSG00000196166_138509.4	271	76
C8orf86	ENSG00000196166_138510.5	1296	432
C8orf86	ENSG00000196166_138511.6	1383	600
C8orf86	ENSG00000196166_138512.7	1100	246
C8orf86	ENSG00000196166_138513.8	3114	595
C8orf86	ENSG00000196166_138514.9	2347	544
C8orf86	ENSG00000196166_138515.10	908	132
C9orf163	ENSG00000196366_62395.1	739	141
C9orf163	ENSG00000196366_62396.2	572	13
C9orf163	ENSG00000196366_62397.3	529	0
C9orf163	ENSG00000196366_62398.4	1332	198
C9orf163	ENSG00000196366_62399.5	3364	440
C9orf163	ENSG00000196366_62400.6	430	115
C9orf163	ENSG00000196366_62401.7	992	179
C9orf163	ENSG00000196366_62402.8	914	103
C9orf163	ENSG00000196366_62403.9	491	0
C9orf163	ENSG00000196366_62404.10	1165	129
C9orf41	ENSG00000156017_192086.1	456	108
C9orf41	ENSG00000156017_192087.2	1887	205
C9orf41	ENSG00000156017_192088.3	1984	337
C9orf41	ENSG00000156017_192089.4	717	87
C9orf41	ENSG00000156017_192090.5	644	90
C9orf41	ENSG00000156017_192091.6	816	112
C9orf41	ENSG00000156017_192092.7	975	261
C9orf41	ENSG00000156017_192093.8	2005	287
C9orf41	ENSG00000156017_192094.9	745	259
C9orf41	ENSG00000156017_192095.10	50	8
CABLES1	ENSG00000134508_46221.1	2363	377
CABLES1	ENSG00000134508_46222.2	3424	895
CABLES1	ENSG00000134508_46223.3	1019	270
CABLES1	ENSG00000134508_46224.4	832	223
CABLES1	ENSG00000134508_46225.5	1690	572
CABLES1	ENSG00000134508_46226.6	1922	333
CABLES1	ENSG00000134508_46227.7	641	81
CABLES1	ENSG00000134508_46228.8	1031	322
CABLES1	ENSG00000134508_46229.9	1306	104
CABLES1	ENSG00000134508_46230.10	57	108
CABP2	ENSG00000167791_60090.1	443	78
CABP2	ENSG00000167791_60091.2	1367	274
CABP2	ENSG00000167791_60092.3	651	126
CABP2	ENSG00000167791_60093.4	531	80
CABP2	ENSG00000167791_60094.5	630	113
CABP2	ENSG00000167791_60095.6	795	142
CABP2	ENSG00000167791_60096.7	184	22
CABP2	ENSG00000167791_60097.8	564	70
CABP2	ENSG00000167791_60098.9	239	111
CABP2	ENSG00000167791_60099.10	467	0
CABP4	ENSG00000175544_106007.1	294	19
CABP4	ENSG00000175544_106008.2	204	7
CABP4	ENSG00000175544_106009.3	1581	590
CABP4	ENSG00000175544_106010.4	1209	170
CABP4	ENSG00000175544_106011.5	1110	170
CABP4	ENSG00000175544_106012.6	2221	670
CABP4	ENSG00000175544_106013.7	910	128
CABP4	ENSG00000175544_106014.8	773	107
CABP4	ENSG00000175544_106015.9	348	275
CABP4	ENSG00000175544_106016.10	2829	452
CABYR	ENSG00000154040_16384.1	1298	328
CABYR	ENSG00000154040_16385.2	1030	68
CABYR	ENSG00000154040_16386.3	977	180
CABYR	ENSG00000154040_16387.4	1037	239
CABYR	ENSG00000154040_16388.5	629	195
CABYR	ENSG00000154040_16389.6	2657	258
CABYR	ENSG00000154040_16390.7	209	19
CABYR	ENSG00000154040_16391.8	933	250
CABYR	ENSG00000154040_16392.9	1458	327
CABYR	ENSG00000154040_16393.10	1734	403
CALHM1	ENSG00000185933_147920.1	311	20
CALHM1	ENSG00000185933_147921.2	543	155
CALHM1	ENSG00000185933_147922.3	769	240
CALHM1	ENSG00000185933_147923.4	1598	467
CALHM1	ENSG00000185933_147924.5	2800	817
CALHM1	ENSG00000185933_147925.6	2417	470
CALHM1	ENSG00000185933_147926.7	1078	226
CALHM1	ENSG00000185933_147927.8	2305	528
CALHM1	ENSG00000185933_147928.9	1035	130
CALHM1	sgCALHM1_1	3106	475
CAMK2B	ENSG00000058404_171738.1	526	122
CAMK2B	ENSG00000058404_171739.2	554	152
CAMK2B	ENSG00000058404_171740.3	1177	547
CAMK2B	ENSG00000058404_171741.4	763	142
CAMK2B	ENSG00000058404_171742.5	1733	379
CAMK2B	ENSG00000058404_171743.6	311	40
CAMK2B	ENSG00000058404_171744.7	704	67
CAMK2B	ENSG00000058404_171745.8	2837	567
CAMK2B	ENSG00000058404_171746.9	675	153
CAMK2B	ENSG00000058404_171747.10	996	118
CAMSAP2	ENSG00000118200_144628.1	711	61
CAMSAP2	ENSG00000118200_144629.2	1731	680
CAMSAP2	ENSG00000118200_144630.3	1848	303
CAMSAP2	ENSG00000118200_144631.4	1121	131
CAMSAP2	ENSG00000118200_144632.5	384	48
CAMSAP2	ENSG00000118200_144633.6	1664	275
CAMSAP2	ENSG00000118200_144634.7	1693	192
CAMSAP2	ENSG00000118200_144635.8	384	59
CAMSAP2	ENSG00000118200_144636.9	290	25
CAMSAP2	ENSG00000118200_144637.10	474	145
CANT1	ENSG00000171302_94444.1	202	0
CANT1	ENSG00000171302_94445.2	954	211
CANT1	ENSG00000171302_94446.3	578	60
CANT1	ENSG00000171302_94447.4	1286	351
CANT1	ENSG00000171302_94448.5	2870	639
CANT1	ENSG00000171302_94449.6	823	346
CANT1	ENSG00000171302_94450.7	970	326
CANT1	ENSG00000171302_94451.8	1562	561
CANT1	ENSG00000171302_94452.9	1385	150
CANT1	ENSG00000171302_94453.10	172	71
CAPN6	ENSG00000077274_199250.1	1338	581
CAPN6	ENSG00000077274_199251.2	2141	848
CAPN6	ENSG00000077274_199252.3	471	188
CAPN6	ENSG00000077274_199253.4	863	381
CAPN6	ENSG00000077274_199254.5	731	104
CAPN6	ENSG00000077274_199255.6	335	255
CAPN6	ENSG00000077274_199256.7	802	194
CAPN6	ENSG00000077274_199257.8	1604	588
CAPN6	ENSG00000077274_199258.9	1105	569
CAPN6	ENSG00000077274_199259.10	1248	157
CARD16	ENSG00000204397_60490.1	4619	1062
CARD16	ENSG00000204397_60491.2	1187	103
CARD16	ENSG00000204397_60493.4	1241	198
CARD16	ENSG00000204397_60494.5	1335	370
CARD16	ENSG00000204397_60495.6	3358	725
CARD16	ENSG00000204397_60496.7	3276	747
CARD16	ENSG00000204397_60497.8	1497	171
CARD16	ENSG00000204397_60498.9	1860	867
CARD16	sgCARD16_2	653	106
CARD16	sgCARD16_4	1028	295
CASKIN1	ENSG00000167971_90095.1	463	361
CASKIN1	ENSG00000167971_90096.2	880	131
CASKIN1	ENSG00000167971_90097.3	1012	97
CASKIN1	ENSG00000167971_90098.4	702	75
CASKIN1	ENSG00000167971_90099.5	1103	215
CASKIN1	ENSG00000167971_90100.6	2600	968
CASKIN1	ENSG00000167971_90101.7	296	106
CASKIN1	ENSG00000167971_90102.8	859	39
CASKIN1	ENSG00000167971_90103.9	949	353
CASKIN1	ENSG00000167971_90104.10	572	17
CCAR1	ENSG00000060339_128160.1	410	0
CCAR1	ENSG00000060339_128161.2	371	49
CCAR1	ENSG00000060339_128162.3	919	278
CCAR1	ENSG00000060339_128163.4	625	97
CCAR1	ENSG00000060339_128164.5	581	6
CCAR1	ENSG00000060339_128165.6	378	103
CCAR1	ENSG00000060339_128166.7	678	61
CCAR1	ENSG00000060339_128167.8	1196	410
CCAR1	ENSG00000060339_128168.9	865	164
CCAR1	ENSG00000060339_128169.10.V	307	34
CCAR2	ENSG00000158941_116253.1	268	165
CCAR2	ENSG00000158941_116254.2	2662	787
CCAR2	ENSG00000158941_116255.3	512	37
CCAR2	ENSG00000158941_116256.4	618	251
CCAR2	ENSG00000158941_116257.5	269	0
CCAR2	ENSG00000158941_116258.6	689	138
CCAR2	ENSG00000158941_116259.7	453	73
CCAR2	ENSG00000158941_116260.8	2531	645
CCAR2	ENSG00000158941_116261.9	1836	109
CCAR2	ENSG00000158941_116262.10	1741	218
CCDC115	ENSG00000136710_195161.1	129	746
CCDC115	ENSG00000136710_195162.2	26	85
CCDC115	ENSG00000136710_195163.3	32	195
CCDC115	ENSG00000136710_195164.4	349	1062
CCDC115	ENSG00000136710_195165.5	181	311
CCDC115	ENSG00000136710_195166.6	1094	125
CCDC115	ENSG00000136710_195167.7	212	1121
CCDC115	ENSG00000136710_195168.8	1069	978
CCDC115	ENSG00000136710_195169.9	529	572
CCDC115	ENSG00000136710_195170.10	2279	488
CCDC183	ENSG00000213213_99705.1	1259	91
CCDC183	ENSG00000213213_99706.2	2097	358
CCDC183	ENSG00000213213_99707.3	1599	308
CCDC183	ENSG00000213213_99708.4	372	35
CCDC183	ENSG00000213213_99709.5	1252	192
CCDC183	ENSG00000213213_99710.6	174	0
CCDC183	ENSG00000213213_99711.7	290	11
CCDC183	ENSG00000213213_99712.8	1109	101
CCDC183	ENSG00000213213_99713.9	1328	229
CCDC183	ENSG00000213213_99714.10	1341	235
CCDC25	ENSG00000147419_172415.1	2526	1104
CCDC25	ENSG00000147419_172416.2	2358	418
CCDC25	ENSG00000147419_172417.3	1351	345
CCDC25	ENSG00000147419_172418.4	830	202
CCDC25	ENSG00000147419_172419.5	2676	653
CCDC25	ENSG00000147419_172420.6	650	115
CCDC25	ENSG00000147419_172421.7	2725	557
CCDC25	ENSG00000147419_172422.8	1231	303
CCDC25	ENSG00000147419_172423.9	709	144
CCDC25	ENSG00000147419_172424.10	382	0
CCDC27	ENSG00000162592_1249.1	1388	599
CCDC27	ENSG00000162592_1250.2	1079	174
CCDC27	ENSG00000162592_1251.3	3310	679
CCDC27	ENSG00000162592_1252.4	728	43
CCDC27	ENSG00000162592_1253.5	350	13
CCDC27	ENSG00000162592_1254.6	1548	189
CCDC27	ENSG00000162592_1255.7	450	42
CCDC27	ENSG00000162592_1257.9	3152	565
CCDC27	ENSG00000162592_1258.10	174	12
CCDC27	sgCCDC27_2	135	30
CCDC40	ENSG00000141519_69965.1	395	0
CCDC40	ENSG00000141519_69966.2	1060	168
CCDC40	ENSG00000141519_69967.3	1572	277
CCDC40	ENSG00000141519_69968.4	534	314
CCDC40	ENSG00000141519_69969.5	531	138
CCDC40	ENSG00000141519_69970.6	1493	393
CCDC40	ENSG00000141519_69971.7	2921	309
CCDC40	ENSG00000141519_69973.9	592	69
CCDC40	ENSG00000141519_69974.10	776	221
CCDC40	sgCCDC40_1	571	246
CCDC8	ENSG00000169515_126792.1	3838	974
CCDC8	ENSG00000169515_126793.2	373	115
CCDC8	ENSG00000169515_126794.3	807	50
CCDC8	ENSG00000169515_126795.4	1568	648
CCDC8	ENSG00000169515_126796.5	1203	349
CCDC8	ENSG00000169515_126797.6	457	68
CCDC8	ENSG00000169515_126798.7	1288	317
CCDC8	ENSG00000169515_126799.8	1259	70
CCDC8	ENSG00000169515_126800.9	975	556
CCDC8	ENSG00000169515_126801.10	886	199
CCDC93	ENSG00000125633_154784.1	836	168
CCDC93	ENSG00000125633_154785.2	1121	418
CCDC93	ENSG00000125633_154786.3	1160	36
CCDC93	ENSG00000125633_154787.4	392	62
CCDC93	ENSG00000125633_154788.5	1525	387
CCDC93	ENSG00000125633_154789.6	68	160
CCDC93	ENSG00000125633_154790.7	2316	1008
CCDC93	ENSG00000125633_154791.8	678	162
CCDC93	ENSG00000125633_154792.9	1599	228
CCDC93	ENSG00000125633_154793.10	2636	442
CCM2L	ENSG00000101331_36906.1	664	127
CCM2L	ENSG00000101331_36907.2	1430	333
CCM2L	ENSG00000101331_36908.3	919	86
CCM2L	ENSG00000101331_36909.4	992	345
CCM2L	ENSG00000101331_36910.5	513	51
CCM2L	ENSG00000101331_36911.6	2102	495
CCM2L	ENSG00000101331_36912.7	183	88
CCM2L	ENSG00000101331_36913.8	433	81
CCM2L	ENSG00000101331_36914.9	795	237
CCM2L	ENSG00000101331_36915.10	6858	1340
CCNJL	ENSG00000135083_89475.1	1637	495
CCNJL	ENSG00000135083_89476.2	712	0
CCNJL	ENSG00000135083_89477.3	974	272
CCNJL	ENSG00000135083_89478.4	1144	244
CCNJL	ENSG00000135083_89479.5	2314	674
CCNJL	ENSG00000135083_89480.6	633	19
CCNJL	ENSG00000135083_89481.7	2464	610
CCNJL	ENSG00000135083_89482.8	794	303
CCNJL	ENSG00000135083_89483.9	1333	153
CCNJL	ENSG00000135083_89484.10	728	54
CCZ1B	ENSG00000146574_198410.1	1834	598
CCZ1B	ENSG00000146574_198411.2	1754	373
CCZ1B	ENSG00000146574_198412.3	487	219
CCZ1B	ENSG00000146574_198413.4	1718	408
CCZ1B	ENSG00000146574_198414.5	106	19
CCZ1B	ENSG00000146574_198415.6	98	122
CCZ1B	ENSG00000146574_198416.7	1133	2338
CCZ1B	ENSG00000146574_198417.8	1038	6250
CCZ1B	ENSG00000146574_198418.9	1427	8171
CCZ1B	ENSG00000146574_198419.10	4198	1133
CCZ1	ENSG00000122674_98189.1	2483	493
CCZ1	ENSG00000122674_98190.2	1898	315
CCZ1	ENSG00000122674_98191.3	577	30
CCZ1	ENSG00000122674_98192.4	1909	537
CCZ1	ENSG00000122674_98193.5	326	3452
CCZ1	ENSG00000122674_98194.6	98	122
CCZ1	ENSG00000122674_98195.7	1133	2338
CCZ1	ENSG00000122674_98196.8	1038	6250
CCZ1	ENSG00000122674_98197.9	3064	425
CCZ1	ENSG00000122674_98198.10	1427	8171
CD180	ENSG00000134061_167576.1	1994	586
CD180	ENSG00000134061_167577.2	4581	817
CD180	ENSG00000134061_167578.3	4053	1329
CD180	ENSG00000134061_167579.4	639	177
CD180	ENSG00000134061_167580.5	3650	1365
CD180	ENSG00000134061_167581.6	1827	490
CD180	ENSG00000134061_167582.7	394	30
CD180	ENSG00000134061_167583.8	1277	468
CD180	ENSG00000134061_167584.9	2793	610
CD180	ENSG00000134061_167585.10	462	169
CD74	ENSG00000019582_195761.1	3187	505
CD74	ENSG00000019582_195762.2	647	435
CD74	ENSG00000019582_195763.3	190	12
CD74	ENSG00000019582_195764.4	670	80
CD74	ENSG00000019582_195765.5	1495	494
CD74	ENSG00000019582_195766.6	415	217
CD74	ENSG00000019582_195767.7	1101	134
CD74	ENSG00000019582_195768.8	327	107
CD74	ENSG00000019582_195769.9	2176	844
CD74	ENSG00000019582_195770.10	334	215
CD9	ENSG00000010278_62315.1	1297	52
CD9	ENSG00000010278_62316.2	901	402
CD9	ENSG00000010278_62317.3	630	102
CD9	ENSG00000010278_62318.4	737	46
CD9	ENSG00000010278_62319.5	312	15
CD9	ENSG00000010278_62320.6	1121	190
CD9	ENSG00000010278_62321.7	823	204
CD9	ENSG00000010278_62322.8	582	30
CD9	ENSG00000010278_62323.9	1129	244
CD9	ENSG00000010278_62324.10	1841	393
CDC20B	ENSG00000164287_40833.1	172	18
CDC20B	ENSG00000164287_40834.2	2403	605
CDC20B	ENSG00000164287_40835.3	528	118
CDC20B	ENSG00000164287_40836.4	1614	432
CDC20B	ENSG00000164287_40837.5	1352	298
CDC20B	ENSG00000164287_40838.6	546	112
CDC20B	ENSG00000164287_40839.7	1020	173
CDC20B	ENSG00000164287_40840.8	2488	575
CDC20B	ENSG00000164287_40841.9	1020	158
CDC20B	ENSG00000164287_40842.10	2229	883
CDC20	ENSG00000117399_168987.2	799	573
CDC20	ENSG00000117399_168988.3	156	32
CDC20	ENSG00000117399_168989.4	105	0
CDC20	ENSG00000117399_168990.5	98	50
CDC20	ENSG00000117399_168991.6	186	71
CDC20	ENSG00000117399_168992.7	19	16
CDC20	ENSG00000117399_168993.8	518	61
CDC20	ENSG00000117399_168994.9	77	25
CDC20	ENSG00000117399_168995.10	63	174
CDC20	sgCDC20_1	423	43
CDH24	ENSG00000139880_156664.1	1249	193
CDH24	ENSG00000139880_156665.2	652	516
CDH24	ENSG00000139880_156666.3	1167	416
CDH24	ENSG00000139880_156667.4	543	13
CDH24	ENSG00000139880_156668.5	313	31
CDH24	ENSG00000139880_156669.6	1814	330
CDH24	ENSG00000139880_156670.7	428	173
CDH24	ENSG00000139880_156671.8	91	153
CDH24	ENSG00000139880_156672.9	692	46
CDH24	ENSG00000139880_156673.10	473	40
CDH9	ENSG00000113100_23716.1	1561	156
CDH9	ENSG00000113100_23717.2	650	191
CDH9	ENSG00000113100_23718.3	418	88
CDH9	ENSG00000113100_23719.4	1167	186
CDH9	ENSG00000113100_23720.5	1653	354
CDH9	ENSG00000113100_23721.6	3058	846
CDH9	ENSG00000113100_23722.7	2827	598
CDH9	ENSG00000113100_23723.8	1256	281
CDH9	ENSG00000113100_23724.9	1028	242
CDH9	ENSG00000113100_23725.10	1593	576
CDKN1A	ENSG00000124762_95653.1	891	445
CDKN1A	ENSG00000124762_95654.2	1302	284
CDKN1A	ENSG00000124762_95655.3	985	174
CDKN1A	ENSG00000124762_95656.4	615	62
CDKN1A	ENSG00000124762_95657.5	565	142
CDKN1A	ENSG00000124762_95658.6	2026	370
CDKN1A	ENSG00000124762_95659.7	1494	64
CDKN1A	ENSG00000124762_95660.8	2383	396
CDKN1A	ENSG00000124762_95661.9	329	27
CDKN1A	ENSG00000124762_95662.10	1038	318
CDKN2A	ENSG00000147889_99285.1	390	209
CDKN2A	ENSG00000147889_99286.2	1134	200
CDKN2A	ENSG00000147889_99287.3	601	33
CDKN2A	ENSG00000147889_99288.4	1137	102
CDKN2A	ENSG00000147889_99289.5	1196	146
CDKN2A	ENSG00000147889_99290.6	3011	290
CDKN2A	ENSG00000147889_99291.7	308	40
CDKN2A	ENSG00000147889_99292.8	1222	256
CDKN2A	ENSG00000147889_99294.10	446	45
CDKN2A	sgCDKN2A_1	637	70
CDYL	ENSG00000153046_11751.1	517	169
CDYL	ENSG00000153046_11752.2	931	113
CDYL	ENSG00000153046_11753.3	2687	794
CDYL	ENSG00000153046_11754.4	441	367
CDYL	ENSG00000153046_11755.5	966	374
CDYL	ENSG00000153046_11756.6	456	39
CDYL	ENSG00000153046_11757.7	182	23
CDYL	ENSG00000153046_11758.8	684	90
CDYL	ENSG00000153046_11759.9	630	123
CDYL	ENSG00000153046_11760.10	883	137
CELSR2	ENSG00000143126_59176.1	319	83
CELSR2	ENSG00000143126_59177.2	1261	138
CELSR2	ENSG00000143126_59178.3	2726	726
CELSR2	ENSG00000143126_59179.4	750	194
CELSR2	ENSG00000143126_59180.5	259	24
CELSR2	ENSG00000143126_59181.6	1247	126
CELSR2	ENSG00000143126_59182.7	247	73
CELSR2	ENSG00000143126_59183.8	549	120
CELSR2	ENSG00000143126_59184.9	246	0
CELSR2	ENSG00000143126_59185.10	998	122
CEMP1	ENSG00000205923_140462.1	772	243
CEMP1	ENSG00000205923_140463.2	1069	425
CEMP1	ENSG00000205923_140464.3	337	100
CEMP1	ENSG00000205923_140465.4	1792	219
CEMP1	ENSG00000205923_140466.5	1081	352
CEMP1	ENSG00000205923_140467.6	705	189
CEMP1	ENSG00000205923_140468.7	1383	257
CEMP1	ENSG00000205923_140469.8	1628	310
CEMP1	ENSG00000205923_140470.9	278	1
CEMP1	ENSG00000205923_140471.10	1667	157
CEP85L	ENSG00000111860_87171.1	2658	629
CEP85L	ENSG00000111860_87172.2	990	23
CEP85L	ENSG00000111860_87173.3	3940	797
CEP85L	ENSG00000111860_87174.4	1476	345
CEP85L	ENSG00000111860_87175.5	1348	239
CEP85L	ENSG00000111860_87176.6	2277	620
CEP85L	ENSG00000111860_87177.7	1828	408
CEP85L	ENSG00000111860_87178.8	1513	547
CEP85L	ENSG00000111860_87179.9	601	63
CEP85L	ENSG00000111860_87180.10	1156	404
CFP	ENSG00000126759_157371.1	139	0
CFP	ENSG00000126759_157372.2	3080	547
CFP	ENSG00000126759_157373.3	1265	175
CFP	ENSG00000126759_157374.4	1380	318
CFP	ENSG00000126759_157375.5	1669	338
CFP	ENSG00000126759_157376.6	1167	305
CFP	ENSG00000126759_157377.7	867	61
CFP	ENSG00000126759_157378.8	101	37
CFP	ENSG00000126759_157379.9	1163	390
CFP	ENSG00000126759_157380.10	788	177
CGA	ENSG00000135346_85238.1	1290	246
CGA	ENSG00000135346_85239.2	820	227
CGA	ENSG00000135346_85240.3	159	57
CGA	ENSG00000135346_85241.4	1992	375
CGA	ENSG00000135346_85242.5	684	376
CGA	ENSG00000135346_85244.7	839	134
CGA	ENSG00000135346_85245.8	1156	104
CGA	ENSG00000135346_85246.9	5162	1209
CGA	ENSG00000135346_85247.10	3532	632
CGA	sgCGA_2	155	44
CH25H	ENSG00000138135_33370.1	544	82
CH25H	ENSG00000138135_33372.3	261	51
CH25H	ENSG00000138135_33373.4	935	386
CH25H	ENSG00000138135_33374.5	1079	189
CH25H	ENSG00000138135_33375.6	860	114
CH25H	ENSG00000138135_33376.7	303	115
CH25H	ENSG00000138135_33377.8	1199	151
CH25H	ENSG00000138135_33378.9	1678	1018
[truncated: 10,437 more rows]

## Sheet: sgRNA sequences Bassik libr
Gene ID	sgRNA	Sequence
A1BG	ENSG00000121410_195964.1	CTGACGGGTGACACCCA
A1BG	ENSG00000121410_195965.2	ACTTCCAGCTGTTCAAGAA
A1BG	ENSG00000121410_195966.3	CAGGTGAGTCAAGGTGCAC
A1BG	ENSG00000121410_195967.4	CCGCTCGGGCTTGTCCAC
A1BG	ENSG00000121410_195968.5	CAAGCTCCTGGAGCTGACA
A1BG	ENSG00000121410_195969.6	CAGCTACCGGACCGATG
A1BG	ENSG00000121410_195970.7	CGCTACTGTGACCATTG
A1BG	ENSG00000121410_195971.8	CCTGCTCCCTGGCTCTCGA
A1BG	ENSG00000121410_195972.9	TGTGCCGAGGTGTGCTGCG
A1BG	ENSG00000121410_195973.10	GCACCTCCAGAAACTCA
A1CF	ENSG00000148584_83076.1	GTGGCCCTCCACCTGGT
A1CF	ENSG00000148584_83077.2	TTGCTTGATTGCATTCT
A1CF	ENSG00000148584_83078.3	TGCGCTGGACCAGTGCG
A1CF	ENSG00000148584_83079.4	CTCATCCTCAAAAAGGTCT
A1CF	ENSG00000148584_83080.5	GAATCAAATCACAAATC
A1CF	ENSG00000148584_83081.6	ACTCTCATACTCCACGA
A1CF	ENSG00000148584_83082.7	GATGCCCCCAACAAATAAT
A1CF	ENSG00000148584_83083.8	AGATGAAAAAGGTTACTGA
A1CF	ENSG00000148584_83084.9	CAGATAAAACCAAAAACCG
A1CF	ENSG00000148584_83085.10	CCTCAACTGCATCTTCT
A2M	ENSG00000175899_95102.1	AAGAACCAGACTTGGATGA
A2M	ENSG00000175899_95103.2	AGACTGAGGCGTCTGT
A2M	ENSG00000175899_95104.3	GACACAGCCCTTCTCAG
A2M	ENSG00000175899_95105.4	GAAATCGCATCGCACAA
A2M	ENSG00000175899_95106.5	TGCTTCCTTGGAGTCTGTC
A2M	ENSG00000175899_95107.6	AGCTTCTTCAGCCCCAGCA
A2M	ENSG00000175899_95108.7	GGAGGCATTGTCCGAAC
A2M	ENSG00000175899_95109.8	CCTGTGAATCTTCACCG
A2M	ENSG00000175899_95110.9	AGTTTCCAGTTAGAGGG
A2M	ENSG00000175899_95111.10	TACGTCATTCTCCGCCTCC
A2ML1	ENSG00000166535_125882.1	GAAGTTTGGTGATGGAG
A2ML1	ENSG00000166535_125883.2	ACCTTCACTTCGAGAC
A2ML1	ENSG00000166535_125884.3	GCATAGATCACCAGGGA
A2ML1	ENSG00000166535_125885.4	AGAGTGTCTTACTGCTT
A2ML1	ENSG00000166535_125886.5	CTGGCTCGAATGCCCTT
A2ML1	ENSG00000166535_125887.6	TCAGCTACAACACCTCCAC
A2ML1	ENSG00000166535_125888.7	TGCCTTCAGAGAACGA
A2ML1	ENSG00000166535_125889.8	GAGCGCACACAGGGATCC
A2ML1	ENSG00000166535_125890.9	CTGGGAGGGGGAGAAGCCA
A2ML1	ENSG00000166535_125891.10	GGATGTTTCCATTCTGGTA
A3GALT2	ENSG00000184389_203181.1	TTCTGACCTGTACCCCC
A3GALT2	ENSG00000184389_203182.2	CTGTCTAGCCTCTTGCT
A3GALT2	ENSG00000184389_203183.3	AAAGAGCCATCCCAAATAA
A3GALT2	ENSG00000184389_203184.4	AAGTACCTGGAGCGCTTCC
A3GALT2	ENSG00000184389_203185.5	AAGTGCGCCTCGCGGCC
A3GALT2	ENSG00000184389_203186.6	TTCACCGAGCTTCCGGGAG
A3GALT2	ENSG00000184389_203187.7	TTGCACGCGGCGCTGGG
A3GALT2	ENSG00000184389_203188.8	CGCTGGCAAGACGTGTCGA
A3GALT2	ENSG00000184389_203189.9	AAGGGCAGACGCCCATG
A3GALT2	ENSG00000184389_203190.10	GCCTGGAAGAGAATCTTC
A4GALT	ENSG00000128274_74441.1	ATCTACTGGCACGTTGT
A4GALT	ENSG00000128274_74442.2	GGTGCAGACCCGCTGCCTT
A4GALT	ENSG00000128274_74443.3	CAGCCGCAGCAGGAGGTCG
A4GALT	ENSG00000128274_74444.4	AGCTGCCCTTTCTCCTT
A4GALT	ENSG00000128274_74445.5	GCAGGGGATCTCTGCTGGC
A4GALT	ENSG00000128274_74446.6	ATGAAAGGGCTTCCGGG
A4GALT	ENSG00000128274_74447.7	TTGCCTGGAGTGGGGCCGT
A4GALT	ENSG00000128274_74448.8	CACGGCCGCGTACCAGT
A4GALT	ENSG00000128274_74449.9	TTCATGTGCTCGGTGGAGT
A4GALT	ENSG00000128274_74450.10	GATTCGGGGTGAGTTCTGG
A4GNT	ENSG00000118017_19195.1	TCACCTTGCTGCTTGTCTG
A4GNT	ENSG00000118017_19196.2	AACACCACAGGCCACTC
A4GNT	ENSG00000118017_19197.3	CCTTCTTTCAAGTCCCACC
A4GNT	ENSG00000118017_19198.4	AAACACAATGCCACGTCTG
A4GNT	ENSG00000118017_19199.5	CTGGACTTCAGGGTGAAC
A4GNT	ENSG00000118017_19200.6	CTCGGATGCATCCCGCC
A4GNT	ENSG00000118017_19201.7	CCAAAAAGTTCTCCTCA
A4GNT	ENSG00000118017_19202.8	CCAGCGCAGAGAGAAAC
A4GNT	ENSG00000118017_19203.9	GCCCTGAGTTGATGACA
A4GNT	ENSG00000118017_19204.10	GGCCTGATGGAGATGACAT
AAAS	ENSG00000094914_165031.1	TGCTTCAGGGAGGGGACTA
AAAS	ENSG00000094914_165032.2	CAGCGAAATGTGGCGTCTC
AAAS	ENSG00000094914_165033.3	GACTGAGTCATCTAGCA
AAAS	ENSG00000094914_165034.4	CCCCTTAGTGCCTCTGTCT
AAAS	ENSG00000094914_165035.5	ATAAGAATGCAGCTCTGGC
AAAS	ENSG00000094914_165036.6	CTCCCGGTGATGGATGA
AAAS	ENSG00000094914_165037.7	ACAAGGAGGTAGGGTCCA
AAAS	ENSG00000094914_165038.8	CATACACCTGTTACCAGCT
AAAS	ENSG00000094914_165039.9	CCCAAGTGCTGTCTCACCC
AAAS	ENSG00000094914_165040.10	TGACTTGACCCCGAGGCGG
AACS	ENSG00000081760_131442.1	ACCGGGGCGCTCCTCCT
AACS	ENSG00000081760_131443.2	CGTGTTCTTCTTACTGTC
AACS	ENSG00000081760_131444.3	TTATGATGACTTGTACCAT
AACS	ENSG00000081760_131445.4	CACCCCGTTGGGGTTGA
AACS	ENSG00000081760_131446.5	AAGTCTGAATATGACTCAA
AACS	ENSG00000081760_131447.6	GCTGAATTTGAGAAAAC
AACS	ENSG00000081760_131448.7	ACGATGCCCCCGGTCTT
AACS	ENSG00000081760_131449.8	CAGAGTTCTGGAAATTCAG
AACS	ENSG00000081760_131450.9	GATGACTTTCTTGCCAC
AACS	ENSG00000081760_131451.10	CTCGAACTCCAGCTGCG
AADAC	ENSG00000114771_39805.1	GCTCCTCAACGTTATCT
AADAC	ENSG00000114771_39806.2	CTCCCGACAACCTTAA
AADAC	ENSG00000114771_39807.3	AGGATCCCCACAATCAGA
AADAC	ENSG00000114771_39808.4	AAAGTCTGAAGCACTAAGA
AADAC	ENSG00000114771_39809.5	TATATAATGCCTTAAGG
AADAC	ENSG00000114771_39810.6	TTATGACTTGCTGTCAAGA
AADAC	ENSG00000114771_39811.7	AAATACCGATTCTCTCA
AADAC	ENSG00000114771_39812.8	ATAACGTTGAGGAGCCA
AADAC	ENSG00000114771_39813.9	AATTGGGAAATGATACTT
AADAC	ENSG00000114771_39814.10	GGCAGGATAAATTAAAGAC
AADACL2	ENSG00000197953_2826.1	GGGCTAAAAGCTCTCTGTT
AADACL2	ENSG00000197953_2827.2	CTTTCTTCAATGTTGTC
AADACL2	ENSG00000197953_2828.3	GCAAGTACAATCGTAC
AADACL2	ENSG00000197953_2829.4	TATTCATCTGAAAGTGGTT
AADACL2	ENSG00000197953_2830.5	TTTATATCCATGATATTC
AADACL2	ENSG00000197953_2831.6	TTTGCCGTCCATCTATTC
AADACL2	ENSG00000197953_2832.7	AAAGTCAGAAACCCGA
AADACL2	ENSG00000197953_2833.8	CAAGTCTTACTTTACCC
AADACL2	ENSG00000197953_2834.9	CTTGATGCTGTTGTTGT
AADACL2	ENSG00000197953_2835.10	GCCATCTTCAAACTGAGC
AADACL3	ENSG00000188984_199136.1	CAGTCTCTTACTGGCAC
AADACL3	ENSG00000188984_199137.2	AAGTCCCTGGATGCATA
AADACL3	ENSG00000188984_199138.3	TGCAAGGAGAGTGACTCCG
AADACL3	ENSG00000188984_199139.4	AGAGCATATGCCATGGT
AADACL3	ENSG00000188984_199140.5	CAGACCACAACCCGGGC
AADACL3	ENSG00000188984_199141.6	TCAACAACTTGTGGAC
AADACL3	ENSG00000188984_199142.7	GATCTGAGCCCGGATCC
AADACL3	ENSG00000188984_199143.8	GGATCATACTTTAGCGG
AADACL3	ENSG00000188984_199144.9	TGGTAGTACACGATGCC
AADACL3	ENSG00000188984_199145.10	GTGGCGGGGGCGTCATG
AADACL4	ENSG00000204518_55865.1	GTAGCAGGGATATCCG
AADACL4	ENSG00000204518_55866.2	ACCCCCAGGAAAAAGAT
AADACL4	ENSG00000204518_55867.3	CCAAGAGTAGCACTAGCCA
AADACL4	ENSG00000204518_55868.4	AAGATGATGCCTCGCCG
AADACL4	ENSG00000204518_55869.5	GAATATATTTGAGAAGCT
AADACL4	ENSG00000204518_55870.6	GAGGGGCCACAGTATTT
AADACL4	ENSG00000204518_55871.7	GTCGGTCACCACAAGTTC
AADACL4	ENSG00000204518_55872.8	ATAGCGTGAGAATTAAAA
AADACL4	ENSG00000204518_55873.9	CGTCGGAGGTGCAGCGG
AADACL4	ENSG00000204518_55874.10	GGCCAGATAATTGCAC
AADAT	ENSG00000109576_137596.1	GATCTATGTGTCACATC
AADAT	ENSG00000109576_137597.2	CCAAGGAGATCATCGATTT
AADAT	ENSG00000109576_137598.3	TGATTACGGCAGTCTTAAA
AADAT	ENSG00000109576_137599.4	AATTACGCACGGTTCATCA
AADAT	ENSG00000109576_137600.5	AATAAGCAGGTTCATCT
AADAT	ENSG00000109576_137601.6	TCCTTGACTGGGTGGGTAA
AADAT	ENSG00000109576_137602.7	TTGCCAGTGATGAAAGT
AADAT	ENSG00000109576_137603.8	GATGGGAGAAGGGTTTC
AADAT	ENSG00000109576_137604.9	TATGTCTCTTAGGGAATC
AADAT	ENSG00000109576_137605.10	AAATGATCATTAATCC
AAED1	ENSG00000158122_153443.1	GATCTGGCCAAAATCCCC
AAED1	ENSG00000158122_153444.2	TCACCCTTATAGTGAT
AAED1	ENSG00000158122_153445.3	GTCACGCGGCAGGTTAG
AAED1	ENSG00000158122_153446.4	TTCGGCGCGCTGTTCC
AAED1	ENSG00000158122_153447.5	ACAGCGGGCAGCCCCTGG
AAED1	ENSG00000158122_153448.6	ATCCAACCTATTCCTATCG
AAED1	ENSG00000158122_153449.7	TGGCCGAGCTGCCGGTGC
AAED1	ENSG00000158122_153450.8	CACGAACACCACCACGGCG
AAED1	ENSG00000158122_153451.9	AAGCCTTCAGAGCCTGTGG
AAED1	ENSG00000158122_153452.10	ACTGTCCAATCACTATAA
AAGAB	ENSG00000103591_185243.1	AATGGTGCATCAAACA
AAGAB	ENSG00000103591_185244.2	ACTTCCCAGAATCTAC
AAGAB	ENSG00000103591_185245.3	GTAGAACTTAGTCCAG
AAGAB	ENSG00000103591_185246.4	CCCTGAATGCCAATGTG
AAGAB	ENSG00000103591_185247.5	GAACAAACCATAGCATT
AAGAB	ENSG00000103591_185248.6	TTGAGAAGGCTAAAGCCT
AAGAB	ENSG00000103591_185249.7	CTGGTGACTAACGCACA
AAGAB	ENSG00000103591_185250.8	AATCCCTCTCTGATCAT
AAGAB	ENSG00000103591_185251.9.V	AGCAGCTGGTGACTAACGCACA
AAGAB	ENSG00000103591_185252.10.V	CAGCTGGTGACTAACGCAC
AAK1	ENSG00000115977_82836.1	ACTCCCGGCGAGAGCA
AAK1	ENSG00000115977_82837.2	TGAGTAGCGGTGATGTA
AAK1	ENSG00000115977_82838.3	AACCAGCGCCTGCAAAC
AAK1	ENSG00000115977_82839.4	CTATTGTATTTCTGGTG
AAK1	ENSG00000115977_82840.5	CTCCGGCTCCAGCGGAGGA
AAK1	ENSG00000115977_82841.6	GCGGGCAACAGCTTCAC
AAK1	ENSG00000115977_82842.7	GCTACATCGGAAGAGTCTT
AAK1	ENSG00000115977_82843.8	GTCACAGTGGACGAGGTGT
AAK1	ENSG00000115977_82844.9	GATTTCTCTCTTGCACACC
AAK1	ENSG00000115977_82845.10	TTGACAAACATGCGTTTCA
AAMDC	ENSG00000087884_116030.1	ATAAGGAAGCAATTTCA
AAMDC	ENSG00000087884_116031.2	TATGGCCAGGGGGTAGT
AAMDC	ENSG00000087884_116032.3	GCTCTAATACAACCTATA
AAMDC	ENSG00000087884_116033.4	TGAAGGAAGTTGTTGAGAA
AAMDC	ENSG00000087884_116034.5	GTACTCCACAGTTGATGA
AAMDC	ENSG00000087884_116035.6	AAATTGCTTCCTTATCATG
AAMDC	ENSG00000087884_116036.7	ATAAGGAAGCAATTTCAG
AAMDC	ENSG00000087884_116037.8	AACACCTGATGGCAGCTGC
AAMDC	ENSG00000087884_116038.9	TGAAGGAGTATAATGCCT
AAMDC	ENSG00000087884_116039.10	GTGTACAGACTCTTGTGAT
AAMP	ENSG00000127837_101337.1	CCGACCACCCCTTCCTG
AAMP	ENSG00000127837_101338.2	ATGACAAAGCCTTCGTA
AAMP	ENSG00000127837_101339.3	AGGGCAACGAAGAGGGC
AAMP	ENSG00000127837_101340.4	CCATGACTCCACTCTAG
AAMP	ENSG00000127837_101341.5	GAGTCCGAATCGGAAAG
AAMP	ENSG00000127837_101342.6	GACCCCAAGACCAATACCT
AAMP	ENSG00000127837_101343.7	ACGGCAACACCTGGATG
AAMP	ENSG00000127837_101344.8	GATGGAGTGGCATCCTC
AAMP	ENSG00000127837_101345.9	GAGACCCTAAGCTTCCA
AAMP	ENSG00000127837_101346.10	TGTGGCAGGTGGACACTA
AANAT	ENSG00000129673_87321.1	TGGGGCCTCAGGTTTCA
AANAT	ENSG00000129673_87322.2	CTGACAGCTCGGGGACT
AANAT	ENSG00000129673_87323.3	GCGCTGACAGCGTCCTC
AANAT	ENSG00000129673_87324.4	GCAGCGAAACTCACTGGCA
AANAT	ENSG00000129673_87325.5	GATCTCATCCAGGTACA
AANAT	ENSG00000129673_87326.6	ACGCCCAAGACGGAGATGA
AANAT	ENSG00000129673_87327.7	GGACAGCTCTGGACATA
AANAT	ENSG00000129673_87328.8	TGTCCTCCTAAGCCAAGGA
AANAT	ENSG00000129673_87329.9	AGCGAGCCGATGATGA
AANAT	ENSG00000129673_87330.10	TTGGAGAACAGCAAGGGAC
AAR2	ENSG00000131043_21146.1	AGGCGCTTGGCTAGCTC
AAR2	ENSG00000131043_21147.2	GCTAATCCGAAGGAAGT
AAR2	ENSG00000131043_21148.3	TCATCCTGAACATGCCCAA
AAR2	ENSG00000131043_21149.4	ATTGACTATAACTCCTGGG
AAR2	ENSG00000131043_21150.5	TCCACAGAGCTGTAGTGG
AAR2	ENSG00000131043_21151.6	ACCGGCACAGGAGGTTC
AAR2	ENSG00000131043_21152.7	CGGGGATCTCACCAAGC
AAR2	ENSG00000131043_21153.8	GAAGCACACAAAAGCAAAC
AAR2	ENSG00000131043_21154.9	TACGAGGCATTTGAGCAT
AAR2	ENSG00000131043_21155.10	AGGGTGTGGTGCTTCATCA
AARD	ENSG00000205002_75669.1	AAGTCGCACGCGGGACG
AARD	ENSG00000205002_75670.2	CAGCGGCGGAAGTCCCCG
AARD	ENSG00000205002_75671.3	GAGCACGGACATCCAGG
AARD	ENSG00000205002_75672.4	TCCTCCAGCAGCGGGCTGG
AARD	ENSG00000205002_75673.5	CAGAGCTGGACGGGCGTTG
AARD	ENSG00000205002_75674.6	CTGGCTAGAACTTTAC
AARD	ENSG00000205002_75675.7	AAAGTGCAGCAATTGAAAA
AARD	ENSG00000205002_75676.8	GATTCGCAGCATCATCTTT
AARD	ENSG00000205002_75677.9	CATTTCCAAAACCACCAGC
AARD	ENSG00000205002_75678.10	TAAAGTTCTAGCCAGCTGG
AARS	ENSG00000090861_65312.1	AATGCTCAGGTCCGAGG
AARS	ENSG00000090861_65313.2	CCCTGCGCTCAGTGCTT
AARS	ENSG00000090861_65314.3	ACCTGAAAGTGGGGGATC
AARS	ENSG00000090861_65315.4	TAAAGTCAAATCTGAGG
AARS	ENSG00000090861_65316.5	TGCGAGTCGTCTCCATT
AARS	ENSG00000090861_65317.6	GATGCACTTCTGGGTAT
AARS	ENSG00000090861_65318.7	CTGTGTGGTTGCTCATGAT
AARS	ENSG00000090861_65319.8	GGTGGACATGGCTCCCT
AARS	ENSG00000090861_65320.9	AGCAACCAATGAGCCTTTC
AARS	ENSG00000090861_65321.10	CATGACTCGAGTTCCGC
AARS2	ENSG00000124608_27945.1	AAGGTCGCCCGCATGGC
AARS2	ENSG00000124608_27946.2	CCATCGGCCGCTCTCAT
AARS2	ENSG00000124608_27947.3	CCAAGGCCTCGGCCGTG
AARS2	ENSG00000124608_27948.4	CCTGCCATCTCGCTTCG
AARS2	ENSG00000124608_27949.5	GAAAGCACACGGCTAGC
AARS2	ENSG00000124608_27950.6	GCTGTTGGCCACACGT
AARS2	ENSG00000124608_27951.7	CTTGGCAATTGGGCCTT
AARS2	ENSG00000124608_27952.8	GTGCCCTCCGCTTCCGTG
AARS2	ENSG00000124608_27953.9	TAGTGGATCTCAGTACA
AARS2	ENSG00000124608_27954.10	CAAACTGGGGTCGCCGCG
AARSD1	ENSG00000266967_15974.1	CAGCTCCGCGGGACAGC
AARSD1	ENSG00000266967_15975.2	AGCGGTTTCCAAGTGGTGC
AARSD1	ENSG00000266967_15976.3	AATGTCCGAGAACTGAGCC
AARSD1	ENSG00000266967_15977.4	GGAACCGGGTGCTGAAG
AARSD1	ENSG00000266967_15978.5	ATTGTACCACGGTCATC
AARSD1	ENSG00000266967_15979.6	TGCTGAGAGTGACTCGCCG
AARSD1	ENSG00000266967_15980.7	ATGTTAACAACCCGAAT
AARSD1	ENSG00000266967_15981.8	AACCTGGCTTCCTGGATCC
AARSD1	ENSG00000266967_15982.9	TGTGGAGCAGAGGATCATG
AARSD1	ENSG00000266967_15983.10	TCACTGAGATTGCTCACAT
AASDH	ENSG00000157426_145018.1	GGATAGACTTACCCTCT
AASDH	ENSG00000157426_145019.2	TGACTTTCAAGGAATTC
AASDH	ENSG00000157426_145020.3	GTGTAGTAAACTGGAAGC
AASDH	ENSG00000157426_145021.4	GCTGCCTCCTGTTATA
AASDH	ENSG00000157426_145022.5	TGCTCTTCAGACTTCAC
AASDH	ENSG00000157426_145023.6	GTACTATACACTTATG
AASDH	ENSG00000157426_145024.7	AAGGATCGAAGGTCAG
AASDH	ENSG00000157426_145025.8	CCTATGTTCTACATACATC
AASDH	ENSG00000157426_145026.9	TTGGGCGACCATTTAT
AASDH	ENSG00000157426_145027.10	TGAATTGCCTGTACAAC
AASDHPPT	ENSG00000149313_149485.1	CAAACGAATATGATTCCAA
AASDHPPT	ENSG00000149313_149486.2	ATGAGTCCTTTGCAAGAAC
AASDHPPT	ENSG00000149313_149487.3	AGATGTTAAAGTTGAAATT
AASDHPPT	ENSG00000149313_149488.4	CGCACGCCCTCCATGGA
AASDHPPT	ENSG00000149313_149489.5	CTGAACCTGAGCTGCAAGT
AASDHPPT	ENSG00000149313_149490.6	CCAAGTGCCGCAGGAAA
AASDHPPT	ENSG00000149313_149491.7	CACTGCCAGCAGCCATT
AASDHPPT	ENSG00000149313_149492.8	GAAACAATCAGAAGCTTTA
AASDHPPT	ENSG00000149313_149493.9	ACTAGGATTTGAATTGCAG
AASDHPPT	ENSG00000149313_149494.10	ATCTATCTCCATTAAACT
AASS	ENSG00000008311_79150.1	CTGCAAGTACATAGGAC
AASS	ENSG00000008311_79151.2	CTGTGTTGGCCGTCCGG
AASS	ENSG00000008311_79152.3	CTGGGGGTCAGCCTCTCCA
AASS	ENSG00000008311_79153.4	ATGTGCTTGGGAGCTAGCG
AASS	ENSG00000008311_79154.5	GCATGGCTCATAACTAC
AASS	ENSG00000008311_79155.6	ATACAGCCTTCGAATCGGC
AASS	ENSG00000008311_79156.7	CTGGTGGCATTCTTCAGG
AASS	ENSG00000008311_79157.8	GAGGCCAATATGGGCTTGT
AASS	ENSG00000008311_79158.9	GTGGATCATAGAGGAGTAC
AASS	ENSG00000008311_79159.10	GAGTTAAAAGACCTCCAG
AATF	ENSG00000108270_54858.1	TTCCAGTTGCAGCGCCA
AATF	ENSG00000108270_54859.2	CGAGGCGGACCCTGAAG
AATF	ENSG00000108270_54860.3	CTGCCAGGGTGATTGAC
AATF	ENSG00000108270_54861.4	GCACGATAAGACCAAAC
AATF	ENSG00000108270_54862.5	AGCATTAGCAGGGGCTTG
AATF	ENSG00000108270_54863.6	GAAGGTGATTTCCTAGTAG
AATF	ENSG00000108270_54864.7	TCCGTGTCCAAGAGGG
AATF	ENSG00000108270_54865.8	ATCGACCATATTCTGA
AATF	ENSG00000108270_54866.9	GATCCCAACGATCAGG
AATF	ENSG00000108270_54867.10	TCAAGATTGAGCGTTCAA
AATK	ENSG00000181409_159784.1	CTCCTCAAGTCCACAGACG
AATK	ENSG00000181409_159785.2	CACAGCCTCCTGTACCTGA
AATK	ENSG00000181409_159786.3	GCCACGGCAGCACAGAA
AATK	ENSG00000181409_159787.4	CCGGGTGGCGGAGTCCA
AATK	ENSG00000181409_159788.5	AGTTTGAGAATGCGGAG
AATK	ENSG00000181409_159789.6	CCAGAGTTCACCTCCCCC
AATK	ENSG00000181409_159790.7	GATCGCGCCAGAGCTGG
AATK	ENSG00000181409_159791.8	CAGGTAGGGCGTCACCT
AATK	ENSG00000181409_159792.9	TCAGGTCAGCCGTGAGC
AATK	ENSG00000181409_159793.10	GTGAAGATTGGTGACTA
ABAT	ENSG00000183044_103937.1	GCGCTGGGCGAGCAACA
ABAT	ENSG00000183044_103938.2	TAGCTGTGCTGGAAGCTGC
ABAT	ENSG00000183044_103939.3	TTGAATTTGATTATGAT
ABAT	ENSG00000183044_103940.4	CAGCTTGACTAATGTGTC
ABAT	ENSG00000183044_103941.5	AGAGCCGAGGCAATTACC
ABAT	ENSG00000183044_103942.6	TCAACAGACCCGCCCT
ABAT	ENSG00000183044_103943.7	TTGGATGAGTTTCAGCA
ABAT	ENSG00000183044_103944.8	CCTCCGGAGAACTTTG
ABAT	ENSG00000183044_103945.9	CTGTAGTCGGGGCAGCC
ABAT	ENSG00000183044_103946.10	CCGTGGGAACGGTGCGA
ABCA1	ENSG00000165029_148855.1	TTACCCGACTCCTGGGG
ABCA1	ENSG00000165029_148856.2	AACACTTCCTTGGGTTCAG
ABCA1	ENSG00000165029_148857.3	CGCATGTCCTTCATGC
ABCA1	ENSG00000165029_148858.4	CCTCCGAGCATCTGAGAAC
ABCA1	ENSG00000165029_148859.5	CCGAACAGAGATCAGGATC
ABCA1	ENSG00000165029_148860.6	AAGGTTTCATTGTCCACC
ABCA1	ENSG00000165029_148861.7	GCTTGTTGGCCTCAGCTG
ABCA1	ENSG00000165029_148862.8	CAGAGGGCATGGCTTTATT
ABCA1	ENSG00000165029_148863.9	GAGAGAGAGGTTGTGATAC
ABCA1	ENSG00000165029_148864.10	CCAGTTTCTCCCTTGGT
ABCA10	ENSG00000154263_30017.1	AGTGCTCCTTTATAACT
ABCA10	ENSG00000154263_30018.2	ACACCAGATGAAGAGACCA
ABCA10	ENSG00000154263_30019.3	GCAAAGTACTGGCTAAA
ABCA10	ENSG00000154263_30020.4	AGGAGTTGACATCAGTTAT
ABCA10	ENSG00000154263_30021.5	ATACCACCTTTCATTTCTA
ABCA10	ENSG00000154263_30022.6	CATCATTAAATGTTGCA
ABCA10	ENSG00000154263_30023.7	GCGTATAAGTTACCTG
ABCA10	ENSG00000154263_30024.8	CAAATGTATGTCAATCCCC
ABCA10	ENSG00000154263_30025.9	CCAAACCAGCGAGCAT
ABCA10	ENSG00000154263_30026.10	TATTTCATACTGGCTTCA
ABCA12	ENSG00000144452_202039.1	ATAATATAACGCATGTG
ABCA12	ENSG00000144452_202040.2	GTCTGGAAAAATTGGCT
ABCA12	ENSG00000144452_202041.3	GACTATTGACAAGTTGC
ABCA12	ENSG00000144452_202042.4	TAAGCTGGCTGCTATTT
ABCA12	ENSG00000144452_202043.5	ACCTTATCTCCAAGCAGTC
ABCA12	ENSG00000144452_202044.6	GTGCTAAATGATCCTTG
ABCA12	ENSG00000144452_202045.7	AGAAATGTGACTGACAGTT
ABCA12	ENSG00000144452_202046.8	CTCTCTGATATGAGCTT
ABCA12	ENSG00000144452_202047.9	TCCTTATATTCCTTACT
ABCA12	ENSG00000144452_202048.10	ATCTGCAACTCCTCGAAG
ABCA13	ENSG00000179869_8670.1	TGACAGCAGGAGGGCCG
ABCA13	ENSG00000179869_8671.2	GCCCGCTGGTAATGTCC
ABCA13	ENSG00000179869_8672.3	AGCATCCGTCAGTGTGGAG
ABCA13	ENSG00000179869_8673.4	CTGCCGATGGATGCAGAC
ABCA13	ENSG00000179869_8674.5	AAAGCCACGTCCGAAC
ABCA13	ENSG00000179869_8675.6	TAAAAGCTGTTAACTGGA
ABCA13	ENSG00000179869_8676.7	GACATCAGGTACATCCA
ABCA13	ENSG00000179869_8677.8	ACAATAACGGCAACACAC
ABCA13	ENSG00000179869_8678.9	AGAGATTCAACAGTGTG
ABCA13	ENSG00000179869_8679.10	GGAGGGTACTCGGTGGCCA
ABCA2	ENSG00000107331_143542.1	GGGCGCCGCTGTGTAGA
ABCA2	ENSG00000107331_143543.2	CAATCGCTGTGCCCGGA
ABCA2	ENSG00000107331_143544.3	GGCGGCCAAGAGTGCTT
ABCA2	ENSG00000107331_143545.4	TCGCTGCCCAATAGCA
ABCA2	ENSG00000107331_143546.5	GACCGCGTGGTGGAGGA
ABCA2	ENSG00000107331_143547.6	AGCCGTTGGGGGCATCC
ABCA2	ENSG00000107331_143548.7	AGCCCGCAGGCGCGTAC
ABCA2	ENSG00000107331_143549.8	CCTGGGCTCAGAGCTCG
ABCA2	ENSG00000107331_143550.9	GATAAAGAACAGCACCAGG
ABCA2	ENSG00000107331_143551.10	AAGCCCACCATCTCCGTGA
ABCA3	ENSG00000167972_90075.1	TCACTGAGACAGTGCGC
ABCA3	ENSG00000167972_90076.2	TGTGTAACTGAACCGT
ABCA3	ENSG00000167972_90077.3	CAAGGAGCCCCTGCCGC
ABCA3	ENSG00000167972_90078.4	GGTGTAGTTCTTCCAGAGG
ABCA3	ENSG00000167972_90079.5	AAGGTCCTGGTGACGGTCC
ABCA3	ENSG00000167972_90080.6	CTCCGCTTGAAGATTCAGT
ABCA3	ENSG00000167972_90081.7	CCCAACGCCACCATCTACC
ABCA3	ENSG00000167972_90082.8	GTGTCTCCTGGCGGAGGGA
ABCA3	ENSG00000167972_90083.9	CGCGGCTTTCCCTCCGAGA
ABCA3	ENSG00000167972_90084.10	GTTCCCTTGGTCCTGGGTT
ABCA4	ENSG00000198691_56736.1	AGGGCATCGCCTTGTTG
ABCA4	ENSG00000198691_56737.2	ATTGCCGAGCCCACTA
ABCA4	ENSG00000198691_56738.3	TGTGTCGGAGTTCGCCC
ABCA4	ENSG00000198691_56739.4	TCTTTGCCCCGCGTCTC
ABCA4	ENSG00000198691_56740.5	AAGAGGAATACGAATAA
ABCA4	ENSG00000198691_56741.6	CTTTGTGGTGGAACTCGTG
ABCA4	ENSG00000198691_56742.7	GAATGCTGCCGTGGCTCCA
ABCA4	ENSG00000198691_56743.8	AAGTGGCGCTGGACCAGCA
ABCA4	ENSG00000198691_56744.9	ATGGCTGTAGAGTGGGT
ABCA4	ENSG00000198691_56745.10	AACTGGACCCTGCGGAAA
ABCA5	ENSG00000154265_187405.1	CTTGTAATATTAGTCAC
ABCA5	ENSG00000154265_187406.2	TATAATGGCAGCATCTA
ABCA5	ENSG00000154265_187407.3	AAGATACTGGAATCATATC
ABCA5	ENSG00000154265_187408.4	AAAGAGTAAACTTGTCCAT
ABCA5	ENSG00000154265_187409.5	TAAAACTGTGAAACCTG
ABCA5	ENSG00000154265_187410.6	TTGCTCGGCTTAGAGAGAC
ABCA5	ENSG00000154265_187411.7	TCCACTGCAATTAGGG
ABCA5	ENSG00000154265_187412.8	GTGAAAATGCTATAACT
ABCA5	ENSG00000154265_187413.9	TCAACTAAAGCTGTTATTA
ABCA5	ENSG00000154265_187414.10	AAATAGATACCTTTCCCCG
ABCA6	ENSG00000154262_30007.1	GGGCCTCTCAATACTTCT
ABCA6	ENSG00000154262_30008.2	AGGAGCCATTCCAGGAAAC
ABCA6	ENSG00000154262_30009.3	ATGATTCCCATAGCATA
ABCA6	ENSG00000154262_30010.4	CTGGGTTAAATTAGATAT
ABCA6	ENSG00000154262_30011.5	TGGACTGTTATATCCC
ABCA6	ENSG00000154262_30012.6	GCACCAAATAAAACACACA
ABCA6	ENSG00000154262_30013.7	ACCAAATACTGGAATAG
ABCA6	ENSG00000154262_30014.8	TATATGAGTCTCCTGAA
ABCA6	ENSG00000154262_30015.9	AATCATTCCAGTAGTAA
ABCA6	ENSG00000154262_30016.10	ATAATTGTAACGAATA
ABCA7	ENSG00000064687_17370.1	CAATTCGACCAGGAGC
ABCA7	ENSG00000064687_17371.2	GTGCCCGCCGATGGCAG
ABCA7	ENSG00000064687_17372.3	GAAGAATTTCATGTATCGC
ABCA7	ENSG00000064687_17373.4	CTCCGCGACATCCAGCA
ABCA7	ENSG00000064687_17374.5	CATCAGCTGTGTCCAGA
ABCA7	ENSG00000064687_17375.6	CAACTCCAGGGGGCCGC
ABCA7	ENSG00000064687_17376.7	CAGGGTGAGCTCCTCGA
ABCA7	ENSG00000064687_17377.8	CTTGTTGGAGGCCGCTG
ABCA7	ENSG00000064687_17378.9	GGTCCAGAAAGGATCGC
ABCA7	ENSG00000064687_17379.10	AAGTTGCTCAGGCGCCC
ABCA8	ENSG00000141338_109081.1	TGTGTGTCAACAAACTT
ABCA8	ENSG00000141338_109082.2	AGATTTGAGCCGTCCGA
ABCA8	ENSG00000141338_109083.3	TTGGGTCGTGTTGGTGAC
ABCA8	ENSG00000141338_109084.4	GTCTTGGGACTGCCAGATG
ABCA8	ENSG00000141338_109085.5	GGCCATTCCAAGCATGA
ABCA8	ENSG00000141338_109086.6	AAGTTCTTGCTAGGACA
ABCA8	ENSG00000141338_109087.7	CGCCTCCAGAATTCCAA
ABCA8	ENSG00000141338_109088.8	GTATTTGACATTTACGA
ABCA8	ENSG00000141338_109089.9	TAGCCTCTACTCCCTTCC
ABCA8	ENSG00000141338_109090.10	CAAGAACTTTCTTAAAAAA
ABCA9	ENSG00000154258_134363.1	AGCAAGAGACGCATGAGCG
ABCA9	ENSG00000154258_134364.2	ATGTAAATTGGAGAAAAAT
ABCA9	ENSG00000154258_134365.3	TCCCCAAGAAAACTTCAAA
ABCA9	ENSG00000154258_134366.4	TGTGAAGGTTCAGAGTTCT
ABCA9	ENSG00000154258_134367.5	TGGCCTGATGAAAAAAGCA
ABCA9	ENSG00000154258_134368.6	TCTCTGTGCTCTTTCATCA
ABCA9	ENSG00000154258_134369.7	AACAGCTGATGTCAGTTAC
ABCA9	ENSG00000154258_134370.8	TCATTGATGACAATGAT
ABCA9	ENSG00000154258_134371.9	CCAGCATACATCAAACCCC
ABCA9	ENSG00000154258_134372.10	CACAAATTGTCGTCCTGAC
ABCB1	ENSG00000085563_20036.1	ATCTTGAAGGGGACCGCAA
ABCB1	ENSG00000085563_20037.2	GCTTGACAAGTTGTATA
ABCB1	ENSG00000085563_20038.3	TAGGATTTACACGTGGT
ABCB1	ENSG00000085563_20039.4	GACTGTCAGCTGCTGTC
ABCB1	ENSG00000085563_20040.5	CTGCCATCATCCATGGGGC
ABCB1	ENSG00000085563_20041.6	ACAGCTATTCGAAGAGT
ABCB1	ENSG00000085563_20042.7	GGTTCTTCATGAATCTGG
ABCB1	ENSG00000085563_20043.8	CTCTGGCCTTCTGGTAT
ABCB1	ENSG00000085563_20044.9	ATGTCTCCAAGATTAATGA
ABCB1	ENSG00000085563_20045.10	GAATGTTCTTTCAGTCAA
ABCB10	ENSG00000135776_18420.1	GCCAGTGAACGGCGATA
ABCB10	ENSG00000135776_18421.2	GAGCCGACCTGGCTCGGCA
ABCB10	ENSG00000135776_18422.3	GTGGCTCGAGCAGCCGCAG
ABCB10	ENSG00000135776_18423.4	CGCGGCTCCTGGGGCTGT
ABCB10	ENSG00000135776_18424.5	GCGCCTCCCGGGGACAAG
ABCB10	ENSG00000135776_18425.6	AAACACGGCACTGAGCCCT
ABCB10	ENSG00000135776_18426.7	ACATCAATGATCTTCCCC
ABCB10	ENSG00000135776_18427.8	TCAGCGCATTGTGAAT
ABCB10	ENSG00000135776_18428.9	ATGCCTACGGAAGCCT
ABCB10	ENSG00000135776_18429.10	GGAATCCTGAGTGACTT
ABCB11	ENSG00000073734_154366.1	AGATCAGATTGGGATAG
ABCB11	ENSG00000073734_154367.2	CAGAAAATATTCGCTA
ABCB11	ENSG00000073734_154368.3	GTCCATGATGAAGTTGT
ABCB11	ENSG00000073734_154369.4	GGCCATTTGGTCAGCTA
ABCB11	ENSG00000073734_154370.5	GTGGTAGAGAACAGAAC
ABCB11	ENSG00000073734_154371.6	GAAACCACAGATGGTCG
ABCB11	ENSG00000073734_154372.7	AGTAGCACGCCTGGCT
ABCB11	ENSG00000073734_154373.8	CTCATAGTCCGTAAACT
ABCB11	ENSG00000073734_154374.9	ACATAGTCCAAGCTGCCA
ABCB11	ENSG00000073734_154375.10	AAGGCCTATGCCAAAGC
ABCB4	ENSG00000005471_13335.1	GCCATAGCTCACGGATC
ABCB4	ENSG00000005471_13336.2	CGGAGGGCGACTTTGAACT
ABCB4	ENSG00000005471_13337.3	ATCTTGAGGCGGCAAAGAA
ABCB4	ENSG00000005471_13338.4	ATAAATTGTTTATGTCGCT
ABCB4	ENSG00000005471_13339.5	CCGCGTATTGAGTTCAG
ABCB4	ENSG00000005471_13340.6	GACTGTGATAGCTTTCG
ABCB4	ENSG00000005471_13341.7	TGAAGGAATTGGTGACA
ABCB4	ENSG00000005471_13342.8	GCCATCAGCCCTATTCT
ABCB4	ENSG00000005471_13343.9	ACAAATTTGTTGATACTGC
ABCB4	ENSG00000005471_13344.10	AGTGGATCCATACCAGA
ABCB5	ENSG00000004846_183987.1	GTGGTCCCGAACAAAAC
ABCB5	ENSG00000004846_183988.2	ACTAACCACTCCAATA
ABCB5	ENSG00000004846_183989.3	GAGCTCAAATGAGTGGA
ABCB5	ENSG00000004846_183990.4	AGTGATAACCTTATTAG
ABCB5	ENSG00000004846_183991.5	GAGCAATACTCAGAATC
ABCB5	ENSG00000004846_183992.6	CAGCACGACAGACCAAG
ABCB5	ENSG00000004846_183993.7	CAAGAACTTAAGCATGC
ABCB5	ENSG00000004846_183994.8	TGGCATTAAAGGAAGGC
ABCB5	ENSG00000004846_183995.9	CCAGCATTCCATCCTTT
ABCB5	ENSG00000004846_183996.10	GACATCACACTCATGATCC
ABCB6	ENSG00000115657_95082.1	CCACAGGCCACAGGCGC
ABCB6	ENSG00000115657_95083.2	TGGTGGGCAAGGGCAGACT
ABCB6	ENSG00000115657_95084.3	TGGGCTGTTCCAAGACACC
ABCB6	ENSG00000115657_95085.4	CCAGACGCTGCCGTGCC
ABCB6	ENSG00000115657_95086.5	CAAACGCCACAGTCCAG
ABCB6	ENSG00000115657_95087.6	TCTACCTGGCGAGATTT
ABCB6	ENSG00000115657_95088.7	GTGGTGCTCATCTGCCT
ABCB6	ENSG00000115657_95089.8	CACCCGGATCCACAGGA
ABCB6	ENSG00000115657_95090.9	CCACAGGTAGCCACTCAGG
ABCB6	ENSG00000115657_95091.10	CGGTATGTGGTCTCTGG
ABCB7	ENSG00000131269_178745.1	CGATGCATTCTTGGCGC
ABCB7	ENSG00000131269_178746.2	TCTCTGTTAGCGGCTC
ABCB7	ENSG00000131269_178747.3	TGGAGGCCACATCAACT
ABCB7	ENSG00000131269_178748.4	GATCAGAATCGCGGAGTGC
ABCB7	ENSG00000131269_178749.5	TATTTGGTGCATCACTC
ABCB7	ENSG00000131269_178750.6	TATCACATGGCAGAGAT
ABCB7	ENSG00000131269_178751.7	GGAACCACAATATTCA
ABCB7	ENSG00000131269_178752.8	TAGATCTGGCCTGTCTTT
ABCB7	ENSG00000131269_178753.9	AAAAGAGGACATGTTGGCA
ABCB7	ENSG00000131269_178754.10	CATGTTTCCCGACATC
ABCB8	ENSG00000197150_124544.1	AGAATGTCTGGAAGCGG
ABCB8	ENSG00000197150_124545.2	GTGCATTTATTTCGGGTC
ABCB8	ENSG00000197150_124546.3	TAGCAGCCTGCCTGGGAAT
ABCB8	ENSG00000197150_124547.4	GGAGCTAGGGGGGCTCG
ABCB8	ENSG00000197150_124548.5	TACCATGGGGCCTAGCA
ABCB8	ENSG00000197150_124549.6	TCATGAAACTCCCTACG
ABCB8	ENSG00000197150_124550.7	TGGGGTCTCGCTTTAAC
ABCB8	ENSG00000197150_124551.8	CCATGCGCTCGCCAACG
ABCB8	ENSG00000197150_124552.9	CAGCACCAGGTACCCGA
ABCB8	ENSG00000197150_124553.10	CTTGACAACTGACGTGC
ABCB9	ENSG00000150967_74551.1	AGGTGCGCAGGCCCATC
ABCB9	ENSG00000150967_74552.2	CGGCTGTGGAAGGCGGTGG
ABCB9	ENSG00000150967_74553.3	ACTTTGGCCTTCATGAGTG
ABCB9	ENSG00000150967_74554.4	GCAGCTGCGGTACAGGC
ABCB9	ENSG00000150967_74555.5	TACGTCCACACGAACA
ABCB9	ENSG00000150967_74556.6	GCGCGGCCCGTGTAGTA
ABCB9	ENSG00000150967_74557.7	AAGGCGAATGTTCAGTC
ABCB9	ENSG00000150967_74558.8	CATGGATCAGTTCAGCA
ABCB9	ENSG00000150967_74559.9	TCGTCATCGTGTGCCTGC
ABCB9	ENSG00000150967_74560.10	GAGCTTCGCCAATGAGG
ABCC1	ENSG00000103222_184975.1	ATGGCTCCGACCCGCTC
ABCC1	ENSG00000103222_184976.2	AACACGGTCCTCGTGT
ABCC1	ENSG00000103222_184977.3	GGATCATGCTCACTTTC
ABCC1	ENSG00000103222_184978.4	CGCTTCCTTCCTGTCG
ABCC1	ENSG00000103222_184979.5	AAGTCGGGGCATATTCC
ABCC1	ENSG00000103222_184980.6	TAGCCTCGGTCATGTC
ABCC1	ENSG00000103222_184981.7	TTCGTGAATGACACGA
ABCC1	ENSG00000103222_184982.8	AAAGCACTTGGTGAAGT
ABCC1	ENSG00000103222_184983.9	TTGGGCTGACCAGAAACAC
ABCC1	ENSG00000103222_184984.10	AAGCTCATGAGGAAGTA
ABCC10	ENSG00000124574_85138.1	GTCTAGCAGCGGGAAGA
ABCC10	ENSG00000124574_85139.2	TAGCATTTCCTGGTTGC
ABCC10	ENSG00000124574_85140.3	GTGCCCCATGAGGACAT
ABCC10	ENSG00000124574_85141.4	GGTGATCAATGGTCTCC
ABCC10	ENSG00000124574_85142.5	GGTTCTCGTGGTCCCCC
ABCC10	ENSG00000124574_85143.6	CTGGCAATGCCACAACA
ABCC10	ENSG00000124574_85144.7	GTTCTTGATCCTCGGGC
ABCC10	ENSG00000124574_85145.8	GGTCATCAAGTTCTGCGGG
ABCC10	ENSG00000124574_85146.9	GCACTGGGAGCCCGAGTAG
ABCC10	ENSG00000124574_85147.10	GGCTGTAGTAGGCCTGG
ABCC11	ENSG00000121270_52009.1	GCGATGACATGGTTTC
ABCC11	ENSG00000121270_52010.2	GTGGCCTCGTGAATCG
ABCC11	ENSG00000121270_52011.3	CTTTGGATCATGAGCG
ABCC11	ENSG00000121270_52012.4	AAGAAGTCTCAAGGCGA
ABCC11	ENSG00000121270_52013.5	ACTAGGAAGAGGACATAC
ABCC11	ENSG00000121270_52014.6	GGGCCATCTTGGAGAGTAT
ABCC11	ENSG00000121270_52015.7	AGAGAAATCCTGAGGCTCC
ABCC11	ENSG00000121270_52016.8	GCCAGCATTGTCCAGGGGC
ABCC11	ENSG00000121270_52017.9	AGCCATGACACGGTGAGGT
ABCC11	ENSG00000121270_52018.10	CATCATGGACTGACAGTGG
ABCC12	ENSG00000140798_102703.1	TTAGCACCCAACCCGG
ABCC12	ENSG00000140798_102704.2	CTACCTCTTCATCCCAA
ABCC12	ENSG00000140798_102705.3	ATCTGGACCAGCGAGGC
ABCC12	ENSG00000140798_102706.4	GGTCGCACTGGGATCA
ABCC12	ENSG00000140798_102707.5	GGGTCATATCTTTCTGCAA
ABCC12	ENSG00000140798_102708.6	CGTGTTGATGGACATCG
ABCC12	ENSG00000140798_102709.7	AGCCAGGAAAATGTGGCGA
ABCC12	ENSG00000140798_102710.8	GTGAAAGGCTACCGGCAA
ABCC12	ENSG00000140798_102711.9	GAATTTCCACACCACG
ABCC12	ENSG00000140798_102712.10	AGTCATATGTCGACAATGG
ABCC2	ENSG00000023839_106649.1	AGCAAACTGTTCTGGTG
ABCC2	ENSG00000023839_106650.2	ATAGAGTTTGGTGGTAG
ABCC2	ENSG00000023839_106651.3	GTCTGCCTCCGGACTGTCC
ABCC2	ENSG00000023839_106652.4	GTCCTGGATTTATACACG
ABCC2	ENSG00000023839_106653.5	AGTACAAGGGCCAGCTCTA
ABCC2	ENSG00000023839_106654.6	ATTGGTATATCGAACAGCA
ABCC2	ENSG00000023839_106655.7	ATCCAATACAGCAGACAA
ABCC2	ENSG00000023839_106656.8	AAAATGCTGAAAAGATC
ABCC2	ENSG00000023839_106657.9	ACATCCTCGAGTGTCAG
ABCC2	ENSG00000023839_106658.10	TATCGAGAGAATCCAGAAT
ABCC3	ENSG00000108846_64038.1	TGCGGTTCCGGGGAGCT
ABCC3	ENSG00000108846_64039.2	CAGGTAGAGCAAGTAGC
ABCC3	ENSG00000108846_64040.3	CTCATACTGTATCAGCA
ABCC3	ENSG00000108846_64041.4	GAAGCAGGGAGTGAGGTCC
ABCC3	ENSG00000108846_64042.5	GGTGCCCTGCATCTACCTG
ABCC3	ENSG00000108846_64043.6	GTGACCCCCACCACCAA
ABCC3	ENSG00000108846_64044.7	GATGATGTAGCCACGACAA
ABCC3	ENSG00000108846_64045.8	CTGTGGTGCGTCTCCTGGG
ABCC3	ENSG00000108846_64046.9	CGCTGGTCTCAGGGTA
ABCC3	ENSG00000108846_64047.10	GAGCGGAATGGGACGA
ABCC4	ENSG00000125257_99145.1	GCTTCACCTCCTGGTACAC
ABCC4	ENSG00000125257_99146.2	AAGAACACGCGTGAGCAG
ABCC4	ENSG00000125257_99147.3	GAATATCGTGCCTTGCT
ABCC4	ENSG00000125257_99148.4	TTTAAAATTGGCCATAAA
ABCC4	ENSG00000125257_99149.5	AAGTTATAACTGGTATA
ABCC4	ENSG00000125257_99150.6	AGCAATCATAAAGTGTTAC
ABCC4	ENSG00000125257_99151.7	CAACTTTCACGGATGCC
ABCC4	ENSG00000125257_99152.8	CCCTTGCAAAGCTGTTT
ABCC4	ENSG00000125257_99153.9	TGTTCTTACACTTCCTG
ABCC4	ENSG00000125257_99154.10	CACTTCGTCTTAGTAACA
ABCC5	ENSG00000114770_39795.1	AGTATATCATCCCCAGTCC
ABCC5	ENSG00000114770_39796.2	GGAGAGAACCAGCACTTCT
ABCC5	ENSG00000114770_39797.3	GTCGAGTTCTCCTGAACT
ABCC5	ENSG00000114770_39798.4	AGAGAGGCCCTCGGCTC
ABCC5	ENSG00000114770_39799.5	GATGAGGAGCATCCCAA
ABCC5	ENSG00000114770_39800.6	CCACGAAAAAGTCATAC
ABCC5	ENSG00000114770_39801.7	CATTGTCCACTGGGTGC
ABCC5	ENSG00000114770_39802.8	TGTGGCCCACAAGAAGG
ABCC5	ENSG00000114770_39803.9	ACCGCACGATTTCCGTC
ABCC5	ENSG00000114770_39804.10	AGTGCTCTGAAGCCCATC
ABCC6	ENSG00000091262_36015.1	AAGAGTGGGGACATCCGG
ABCC6	ENSG00000091262_36016.2	ACCACGATCCAGACGAG
ABCC6	ENSG00000091262_36017.3	AAAGGCGGCAGTGGCATGA
ABCC6	ENSG00000091262_36018.4	GGCGCCTTGCGGACCTC
ABCC6	ENSG00000091262_36019.5	AGACCGAGCCCTTCCTA
ABCC6	ENSG00000091262_36020.6	GGTGTCCTTTGACCGTC
ABCC6	ENSG00000091262_36021.7	ACCACATCACCCACCGCAC
ABCC6	ENSG00000091262_36022.8	AAATGTAGACACTTGGA
ABCC6	ENSG00000091262_36023.9	GCTGTTGTCGGTCCAGT
ABCC6	ENSG00000091262_36024.10	CGATGGCAGTGAGGGCGGA
ABCC8	ENSG00000006071_12605.1	CGGCAGCGAGAACCACT
ABCC8	ENSG00000006071_12606.2	TTCTTGGACCACGCCAT
ABCC8	ENSG00000006071_12607.3	GCATGTACAGGTGCAGA
ABCC8	ENSG00000006071_12608.4	ATGGCTCGCAAGTCGAT
ABCC8	ENSG00000006071_12609.5	GACAGCAGATTCACGAA
ABCC8	ENSG00000006071_12610.6	CTGGTGTATTGGACCC
ABCC8	ENSG00000006071_12611.7	CGAGGCCTTTGACGCCC
ABCC8	ENSG00000006071_12612.8	TGGAGGTCAATGTCATC
ABCC8	ENSG00000006071_12613.9	GACATTCAGGGCACTCA
ABCC8	ENSG00000006071_12614.10	CTGTGGTGGATGTGCACCT
ABCC9	ENSG00000069431_97812.1	ACATGAGGGACCAGGTTGA
ABCC9	ENSG00000069431_97813.2	AATGTAAGAATCCATCTC
ABCC9	ENSG00000069431_97814.3	CAACGAATCCCATCACGGC
ABCC9	ENSG00000069431_97815.4	TTGTTACCACAAAATGAA
ABCC9	ENSG00000069431_97816.5	AAAATGAAGCCATGTGTTG
ABCC9	ENSG00000069431_97817.6	GTTAAGTACTGTCAGTC
ABCC9	ENSG00000069431_97818.7	CCCATAGATTAGGACAC
ABCC9	ENSG00000069431_97819.8	TAGCACATTCCGCTATC
ABCC9	ENSG00000069431_97820.9	TTGCAGATCATCCAAAT
ABCC9	ENSG00000069431_97821.10	AGATTGGTGACGACAGT
ABCD1	ENSG00000101986_76655.1	TGCCGGCTCCACGGGAG
ABCD1	ENSG00000101986_76656.2	AGGCCGGCGATGGCCGA
ABCD1	ENSG00000101986_76657.3	TCTCTGACGGAGGACGTGG
ABCD1	ENSG00000101986_76658.4	GAGTGGCTTGGTCAGGT
ABCD1	ENSG00000101986_76659.5	TGCTAGCCACGATGAAA
ABCD1	ENSG00000101986_76660.6	CCGCTGTCAGGAGGTTG
ABCD1	ENSG00000101986_76661.7	GGTGCACGAGATGTTCC
ABCD1	ENSG00000101986_76662.8	GCCGTGAAGAAGGCAGCCT
ABCD1	ENSG00000101986_76663.9	GATGAGGTTGATCTGCG
ABCD1	ENSG00000101986_76664.10	AGCGTCCTCTAGCTCCC
ABCD2	ENSG00000173208_26385.1	ATCGAGTGCTGCTAAGA
ABCD2	ENSG00000173208_26386.2	CAGCTGATCGAGTGAAA
ABCD2	ENSG00000173208_26387.3	AGCATATGCCGCAGCCACC
ABCD2	ENSG00000173208_26388.4	AAATCTGCATTCACTCC
ABCD2	ENSG00000173208_26389.5	GCAAGCGTTTAAAGCAATC
ABCD2	ENSG00000173208_26390.6	ATGTACCACAAACGTT
ABCD2	ENSG00000173208_26391.7	CAGTGGACTAATTATGG
ABCD2	ENSG00000173208_26392.8	GAGCTGATGCTATTGAA
ABCD2	ENSG00000173208_26393.9	TTCCTGATGAAGTATGTT
ABCD2	ENSG00000173208_26394.10	GCCAGTAAATTTCGAGCAG
ABCD3	ENSG00000117528_13385.1	GTATCATTGGTCGTAGC
ABCD3	ENSG00000117528_13386.2	TTTGGATGATTCAAAAT
ABCD3	ENSG00000117528_13387.3	GTACTTATTGCTGTTATGC
ABCD3	ENSG00000117528_13388.4	GCCTTCAGCAAGTACTTGA
ABCD3	ENSG00000117528_13389.5	CTCTGCCTGCTCCACAAG
ABCD3	ENSG00000117528_13390.6	TTAATAACTTCTTGAAGTA
ABCD3	ENSG00000117528_13391.7	AAGATACTCCTCATAG
ABCD3	ENSG00000117528_13392.8	GAGCGAGCTGTGGTGGACA
ABCD3	ENSG00000117528_13393.9	TAGGCCATCATGCTCGC
ABCD3	ENSG00000117528_13394.10	TTATTGTCATCTTACCAAT
ABCD4	ENSG00000119688_153032.1	GTTCTGCCGATGATGAG
ABCD4	ENSG00000119688_153033.2	AGAAATTGCAGATCTAACC
ABCD4	ENSG00000119688_153034.3	CAATTTGTGATCTACC
ABCD4	ENSG00000119688_153035.4	CACGGCCCCGGAAGTAG
ABCD4	ENSG00000119688_153036.5	ATCCCCAGTCAGTACTA
ABCD4	ENSG00000119688_153037.6	GGCCTGTGAGCATCTTC
ABCD4	ENSG00000119688_153038.7	CTCACATACAGCAGGTTGC
ABCD4	ENSG00000119688_153039.8	TTTAAGACTCTGACATTCC
ABCD4	ENSG00000119688_153040.9	TGGTGAACAAAACTTTGAT
ABCD4	ENSG00000119688_153041.10	CACCAGCTTCATCACAATG
ABCE1	ENSG00000164163_176934.1	GTAGATTGACAATTGATA
ABCE1	ENSG00000164163_176935.2	GCACAATATCGATGTG
ABCE1	ENSG00000164163_176936.3	AGTTGTCCTGTAGTTCGAA
ABCE1	ENSG00000164163_176937.4	TCAAAATCTCCTGCCAGTC
ABCE1	ENSG00000164163_176938.5	GAATCTGGTCTACATATTG
ABCE1	ENSG00000164163_176939.6	ACATCTAGGTAACTAGA
ABCE1	ENSG00000164163_176940.7	TCAATCTACCAAGCAACT
ABCE1	ENSG00000164163_176941.8	ACAATTGATAAGGCGCCAA
ABCE1	ENSG00000164163_176942.9	TAGCTTTAGCCCTTTGCTT
ABCE1	ENSG00000164163_176943.10	ATGTCAAGCAGCGTTTAA
ABCF1	ENSG00000204574_155234.1	ATCCACTCGGGCTCCGG
ABCF1	ENSG00000204574_155235.2	CCCCAAAACCCCGCGGA
ABCF1	ENSG00000204574_155236.3	CTGGCAGTAGAAGATAAAC
ABCF1	ENSG00000204574_155237.4	CGAGATACCCGAAAAGGC
ABCF1	ENSG00000204574_155238.5	TGCCAACCAGTGATGAGG
ABCF1	ENSG00000204574_155239.6	TAGCCGGCCGCCGCTAC
ABCF1	ENSG00000204574_155240.7	CCAAGCCGGAGAAGAAT
ABCF1	ENSG00000204574_155241.8	CATCTCCGCTCATGGCA
ABCF1	ENSG00000204574_155242.9	AGAAAGTGCTCAAGGAGA
ABCF1	ENSG00000204574_155243.10	ACTTCTCCGTGTCCCAGG
ABCF2	ENSG00000033050_128200.1	GGCCGCTGTCGAGCTT
ABCF2	ENSG00000033050_128201.2	AAGGCAGCCAAAAAGAAGG
ABCF2	ENSG00000033050_128202.3	ATGTTGTCACAGAACCAC
ABCF2	ENSG00000033050_128203.4	TGAACATCAGTACTGTTG
ABCF2	ENSG00000033050_128204.5	ACCATGAAAGGTAAGTGAG
ABCF2	ENSG00000033050_128205.6	AGCTGTCACTGGCGTCC
ABCF2	ENSG00000033050_128206.7	GCCGTCGTTATGGCCTCAT
ABCF2	ENSG00000033050_128207.8	TCCATGCAAGATCCGCG
ABCF2	ENSG00000033050_128208.9	GAGCTCTACGAGCGCC
ABCF2	ENSG00000033050_128209.10	ATGGAAGTCGACACAGAG
ABCF3	ENSG00000161204_159604.1	ACTTGTCCGTCAATTTC
ABCF3	ENSG00000161204_159605.2	CGCGGACTTCGAGTCTG
ABCF3	ENSG00000161204_159606.3	GGGCGTCCAGTAGCACC
ABCF3	ENSG00000161204_159607.4	ACTTGCGCCGAAATCCTG
ABCF3	ENSG00000161204_159608.5	GATGACGCGGGCATCA
ABCF3	ENSG00000161204_159609.6	TAGGGGAACTATTGCAAG
ABCF3	ENSG00000161204_159610.7	CCCCACCAGCCCGTAA
ABCF3	ENSG00000161204_159611.8	AAGGCCGAGGCTCGACTTA
ABCF3	ENSG00000161204_159612.9	TTCCCTCTTTAGCAGTCC
ABCF3	ENSG00000161204_159613.10	AGAGTCGGTTGGAATCATC
ABCG1	ENSG00000160179_181835.1	CGTGGACTTCCCGGCCC
ABCG1	ENSG00000160179_181836.2	GCTCCCGGTCCGCGTGT
ABCG1	ENSG00000160179_181837.3	AAGTTCAATAGTGGTGAGT
ABCG1	ENSG00000160179_181838.4	GAGATACTGACAGCGCT
ABCG1	ENSG00000160179_181839.5	GGCAGGCCGTTGATGAGGA
ABCG1	ENSG00000160179_181840.6	CCGCATCTCACTGTGCAGG
ABCG1	ENSG00000160179_181841.7	CGAGACCACCTGGAAGC
ABCG1	ENSG00000160179_181842.8	AGATGACGGAGCCCAAGT
ABCG1	ENSG00000160179_181843.9	AAAGGGCTCGCTCAAGG
ABCG1	ENSG00000160179_181844.10	TTCACAGCTGCCCTCCG
ABCG2	ENSG00000118777_65136.1	CTGTCGCGGGGAAGCCAT
ABCG2	ENSG00000118777_65137.2	ATAATATTTCTTTCTCAAC
ABCG2	ENSG00000118777_65138.3	GTCTCAACGCCATCCT
ABCG2	ENSG00000118777_65139.4	CTGCAAGGAAAGATCCAAG
ABCG2	ENSG00000118777_65140.5	TTTATCCGTGGTGTGTC
ABCG2	ENSG00000118777_65141.6	GTTCCGGGCGCGCAGGA
ABCG2	ENSG00000118777_65142.7	TCTGACCTAGCTGGGTT
ABCG2	ENSG00000118777_65143.8	CGTCTCTCAATCTCAGT
ABCG2	ENSG00000118777_65144.9	TTGTGATGGGCACTCTGA
ABCG2	ENSG00000118777_65145.10	AGTTAGGTCTGGATAAAG
ABCG4	ENSG00000172350_15392.1	ACTTGCCAGCCCCTGAG
ABCG4	ENSG00000172350_15393.2	AGAAGGCGCTGGAGGCCGT
ABCG4	ENSG00000172350_15394.3	TCCTCCAGCGTCACGGCCA
ABCG4	ENSG00000172350_15395.4	GTGCGTGGTCAGCACAGG
ABCG4	ENSG00000172350_15396.5	GGGCAGATCCTGGTTAA
ABCG4	ENSG00000172350_15397.6	GGTAGGTGGGAGAAGCGCT
ABCG4	ENSG00000172350_15398.7	CCGTGGACATCGAGTTCG
ABCG4	ENSG00000172350_15399.8	GCGGCAGAATTTACCTGAG
ABCG4	ENSG00000172350_15400.9	AGATCCTGACGGCACT
ABCG4	ENSG00000172350_15401.10	TGTGGGAGCACGACATC
ABCG5	ENSG00000138075_72202.1	CCATGTCCGGGAGGCTG
ABCG5	ENSG00000138075_72203.2	TTCACATACACCTCCCCC
ABCG5	ENSG00000138075_72204.3	CTGCGCCGGGAGCAGTTCC
ABCG5	ENSG00000138075_72205.4	CAGCGTCTCGCGCACGGTG
ABCG5	ENSG00000138075_72206.5	ATTGGCAACTACAGCTT
ABCG5	ENSG00000138075_72207.6	ACTCAGCTCTGCCATGA
ABCG5	ENSG00000138075_72208.7	ACCCCCGGAGGGTCCAT
ABCG5	ENSG00000138075_72209.8	GAGCAGCTGGGCTGCGA
ABCG5	ENSG00000138075_72210.9	CCCGCTCTCCACGTACA
ABCG5	ENSG00000138075_72211.10	GAGACCTACGCGGTCC
ABCG8	ENSG00000143921_136739.1	AGGAGAACAATCTATCC
ABCG8	ENSG00000143921_136740.2	CCGAAAGGGGCCACTCCCC
ABCG8	ENSG00000143921_136741.3	ATGTGATCACTGGCCG
ABCG8	ENSG00000143921_136742.4	GCCAGATCTGGATCAAT
ABCG8	ENSG00000143921_136743.5	GTGTTGGGCTGGCCACTGT
ABCG8	ENSG00000143921_136744.6	GTTGTGCTGGCGCACGT
ABCG8	ENSG00000143921_136745.7	CCGCATCTGGGCAATGA
ABCG8	ENSG00000143921_136746.8	AGCCAGCTGCTCAAACCAA
ABCG8	ENSG00000143921_136747.9	TGCGCTGACACCCGCGT
ABCG8	ENSG00000143921_136748.10	CCCAGCTCACAAGAATTC
ABHD1	ENSG00000143994_74871.1	CCGTTGCCCTCTACTT
ABHD1	ENSG00000143994_74872.2	AGAGAAGGTGTCTGCCC
ABHD1	ENSG00000143994_74873.3	ACATCCTCCAAACACCAGA
ABHD1	ENSG00000143994_74874.4	GGCTGGGTAGTAGGATC
ABHD1	ENSG00000143994_74875.5	TTAACCAAGCTCTGAGGGA
ABHD1	ENSG00000143994_74876.6	CGTTGGGTAGAAAGTCT
ABHD1	ENSG00000143994_74877.7	CTGGCACAAAAAGCCCTGT
ABHD1	ENSG00000143994_74878.8	GTGGCTGGGCCGCAGTTTC
ABHD1	ENSG00000143994_74879.9	CTGTCGTGTTTAACAACCG
ABHD1	ENSG00000143994_74880.10	CTCCACTGCTGGCCGT
ABHD10	ENSG00000144827_109870.1	CGCGCTTGGCAGCTGTGG
ABHD10	ENSG00000144827_109871.2	CTCCGACAAGGTACCC
ABHD10	ENSG00000144827_109872.3	CACGCTGAGGCCACGGT
ABHD10	ENSG00000144827_109873.4	GAAGGTCTGGTCGATTA
ABHD10	ENSG00000144827_109874.5	AATGGTACAAAAGCGT
ABHD10	ENSG00000144827_109875.6	ATTAAACTTTGTCACTA
ABHD10	ENSG00000144827_109876.7	CAATTGCACGACCAGAGA
ABHD10	ENSG00000144827_109877.8	TTCAGATGGTAACTCAG
ABHD10	ENSG00000144827_109878.9	TTGGATCTAGCCTTGGA
ABHD10	ENSG00000144827_109879.10	TAGAGATGAAAGGTGTG
ABHD11	ENSG00000106077_170191.1	GCACCCTCGCGAAGCTA
ABHD11	ENSG00000106077_170192.2	CAAAAAGACGACGGCCGGG
ABHD11	ENSG00000106077_170193.3	ATCTTGGCCCAGCAGAC
ABHD11	ENSG00000106077_170194.4	CCTCCAGGCTCGGGTCCAG
ABHD11	ENSG00000106077_170195.5	CCGCTTCCGCTTTCCTAC
ABHD11	ENSG00000106077_170196.6	GTGGATGCTCGTAACCA
ABHD11	ENSG00000106077_170197.7	GTGCCCTGCGTCGTCGT
ABHD11	ENSG00000106077_170198.8	AGACGTTCCACCAGCTC
ABHD11	ENSG00000106077_170199.9	CGAAGCTAGGGCCGTGG
ABHD11	ENSG00000106077_170200.10	CTGCTGCTGGGTGCGAC
ABHD12	ENSG00000100997_45551.1	CAGAACCTACGCCTGAC
ABHD12	ENSG00000100997_45552.2	CTCCAAGGCGACGGGCT
ABHD12	ENSG00000100997_45553.3	CCGACGCGGGAATGAAG
ABHD12	ENSG00000100997_45554.4	TACCTGCATGGGAACGC
ABHD12	ENSG00000100997_45555.5	GGCGTGTGGTTGCGCCTG
ABHD12	ENSG00000100997_45556.6	GGCTCGTCCTCCTCCGGCT
ABHD12	ENSG00000100997_45557.7	GACATAGTTTGATGAGAAA
ABHD12	ENSG00000100997_45558.8	GTCATGCCCCGCTCAGA
ABHD12	ENSG00000100997_45559.9	TGGCGACAAATCTGGTG
ABHD12	ENSG00000100997_45560.10	AAAAAACCACAGGATCA
ABHD12B	ENSG00000131969_193916.1	GCGGCCACGCAGCTAC
ABHD12B	ENSG00000131969_193917.2	GACGCGCAGGACTGCCAGG
ABHD12B	ENSG00000131969_193918.3	AAGCAGCCCTTCGTGAT
ABHD12B	ENSG00000131969_193919.4	CATCTTCCCCCCGGCAGCT
ABHD12B	ENSG00000131969_193920.5	CCATTTGTGTCTATGAG
ABHD12B	ENSG00000131969_193921.6	CTTCGCACAGACTGAAGC
ABHD12B	ENSG00000131969_193922.7	TAGTCAGTCCCTCCTCTGT
ABHD12B	ENSG00000131969_193923.8	AACCTGGGGTGATGCTA
ABHD12B	ENSG00000131969_193924.9	AGCATTGAACAGGAGTG
ABHD12B	ENSG00000131969_193925.10	CAACCCACATGTTGGTAAA
ABHD13	ENSG00000139826_32253.1	AAAGATGGCTAATAGCCT
ABHD13	ENSG00000139826_32254.2	ATGAAAAGTCACTATTAA
ABHD13	ENSG00000139826_32255.3	TGGAATGCCAGTGGGCA
ABHD13	ENSG00000139826_32256.4	GTATTCTGTATAAATTCC
ABHD13	ENSG00000139826_32257.5	GTTGATTATCGAGGATA
ABHD13	ENSG00000139826_32258.6	CCAAATGCATTACTTATGT
ABHD13	ENSG00000139826_32259.7	GATTTCAGCCATTATGG
ABHD13	ENSG00000139826_32260.8	GGAATGCAGGCAACAT
ABHD13	ENSG00000139826_32261.9	GAGCAGTGGCTATTCATT
ABHD13	ENSG00000139826_32262.10	CAAAAGGTTAACTTTG
ABHD14A	ENSG00000248487_96353.1	GTACAGACCTCCATGAGC
ABHD14A	ENSG00000248487_96354.2	GCAGCCCCACATACAGT
ABHD14A	ENSG00000248487_96355.3	CCAGGACTGTGACATTG
ABHD14A	ENSG00000248487_96356.4	GGCCCAACGGGATGAGC
ABHD14A	ENSG00000248487_96357.5	CTGGTTCCGCCTGGGCG
ABHD14A	ENSG00000248487_96358.6	CACCTCGCGGTAAAAGAT
ABHD14A	ENSG00000248487_96359.7	GTGGCAACTCCCAAGGAG
ABHD14A	ENSG00000248487_96360.8	GGCCTCTCGGAAGAAGA
ABHD14A	ENSG00000248487_96361.9	AAGCGAGCCTGCCCACTGC
ABHD14A	ENSG00000248487_96362.10	GTGGTGCTGCTTCATGGAA
ABHD14A-ACY1	ENSG00000114786_86351.1	GGCCCAACGGGATGAGC
ABHD14A-ACY1	ENSG00000114786_86352.2	CTGGTTCCGCCTGGGCG
ABHD14A-ACY1	ENSG00000114786_86353.3	GTACAGACCTCCATGAGC
ABHD14A-ACY1	ENSG00000114786_86354.4	GCAGCCCCACATACAGT
ABHD14A-ACY1	ENSG00000114786_86355.5	CCAGGACTGTGACATTG
ABHD14A-ACY1	ENSG00000114786_86356.6	CACCTCGCGGTAAAAGAT
ABHD14A-ACY1	ENSG00000114786_86357.7	GTGGTGCTGCTTCATGGAA
ABHD14A-ACY1	ENSG00000114786_86358.8	AAGGTCAAGGGCCACGGCC
ABHD14A-ACY1	ENSG00000114786_86359.9	CAGCTACTGTCACAGAG
ABHD14A-ACY1	ENSG00000114786_86360.10	TGGTGACCGTGTTGACC
ABHD14B	ENSG00000114779_39845.1	CAAGCGTGGAGCAGCGCGA
ABHD14B	ENSG00000114779_39846.2	GGCCTCTCGGAAGAAGA
ABHD14B	ENSG00000114779_39847.3	GTTCTGCCAGGTCTCGG
ABHD14B	ENSG00000114779_39848.4	GCTGGCCCAGGCTGGCTAC
ABHD14B	ENSG00000114779_39849.5	GACTGATCACAACCGGG
ABHD14B	ENSG00000114779_39850.6	CAGCCCCTGCCCCTATT
ABHD14B	ENSG00000114779_39851.7	GCATCCACCACAGCCGCC
ABHD14B	ENSG00000114779_39852.8	AGCCAGGGGCCGTGAGGAA
ABHD14B	ENSG00000114779_39853.9	CTCCCGGGCTTTGTGCCAG
ABHD14B	ENSG00000114779_39854.10	ATCAGCACCCGGTGGTT
ABHD15	ENSG00000168792_110918.1	GCCGTGCTCGCCCTTCT
ABHD15	ENSG00000168792_110919.2	GCGGACCAGTTCAGCGA
ABHD15	ENSG00000168792_110920.3	GTCTTGGGCCCCCGGCA
ABHD15	ENSG00000168792_110921.4	CCTTGTTTGCAAGCCGT
ABHD15	ENSG00000168792_110922.5	CGCCTCTGAGCGCCGCA
ABHD15	ENSG00000168792_110923.6	TTCCCTTCGAGAGTTTG
ABHD15	ENSG00000168792_110924.7	GCTCCTGAACAGTCTGC
ABHD15	ENSG00000168792_110925.8	TAGGTATCCCAGCTGATG
ABHD15	ENSG00000168792_110926.9	CTCCGGGATGTCGATG
ABHD15	ENSG00000168792_110927.10	GCAAGGGCTCCTGGCGC
ABHD16A	ENSG00000204427_95973.1	GCTCTACAAAATCTACC
ABHD16A	ENSG00000204427_95974.2	ATAAAAACAGAGCCGGGGG
ABHD16A	ENSG00000204427_95975.3	CGTCCCTGAGACGCCAA
ABHD16A	ENSG00000204427_95976.4	AGGGACTCTGAAAGGGCCC
ABHD16A	ENSG00000204427_95977.5	GCCAGTCGACTTCCACT
ABHD16A	ENSG00000204427_95978.6	GCAGTTCATCACCATCT
ABHD16A	ENSG00000204427_95979.7	CTGCTACTTCTGGCAGGTG
ABHD16A	ENSG00000204427_95980.8	TGAGAAAACGGCACCACTT
ABHD16A	ENSG00000204427_95981.9	CCTTCTTCTACTTGTAC
ABHD16A	ENSG00000204427_95982.10	GCGAAGCAGGGCCACACCC
ABHD16B	ENSG00000183260_4992.1	CAACCACACGCCCGCCG
ABHD16B	ENSG00000183260_4993.2	GCCCGTGGCCTTCCGCT
ABHD16B	ENSG00000183260_4994.3	TGCGTCATCTGCTTCGTGA
ABHD16B	ENSG00000183260_4995.4	GTAGGTGTAGCTGGCGGTC
ABHD16B	ENSG00000183260_4996.5	CGCTGGCCCACTCGCT
ABHD16B	ENSG00000183260_4997.6	CAGCGCGCGCGTCATCA
ABHD16B	ENSG00000183260_4998.7	TGGAGCGCTACCACGGC
ABHD16B	ENSG00000183260_4999.8	CTCGCGGAGCTGCTGCAAG
ABHD16B	ENSG00000183260_5000.9	CGGGCTTCTACGAGAT
ABHD16B	ENSG00000183260_5001.10	TCTGTCTGCACCGCTCG
ABHD17A	ENSG00000129968_162840.1	GCCATCCCCAGCTGGCAT
ABHD17A	ENSG00000129968_162841.2	ACTCCAACAACCCAGCGCC
ABHD17A	ENSG00000129968_162842.3	GTGCCTGAGCCCGAGCCG
ABHD17A	ENSG00000129968_162843.4	GTGGATGTACCCGCAGGCC
ABHD17A	ENSG00000129968_162844.5	GGGATGGCCTCCCTGAGCC
ABHD17A	ENSG00000129968_162845.6	AGGCCATCCCCAGCTGGCA
ABHD17A	ENSG00000129968_162846.7	GCTCGGGCTCAGGCACCA
ABHD17A	ENSG00000129968_162847.8	GTGCCTGAGCCCGAGCC
ABHD17A	ENSG00000129968_162848.9	CGCCTGGTGGTTGCCTGCT
ABHD17A	ENSG00000129968_162849.10	CGCCTGGTGGTTGCCTGC
ABHD17B	ENSG00000107362_120175.1	AAGCAATCTTCCCTGGACA
ABHD17B	ENSG00000107362_120176.2	TGTGTAAGTTGGATCAGG
ABHD17B	ENSG00000107362_120177.3	ACAGATGTAAAGTCCAA
ABHD17B	ENSG00000107362_120178.4	CAATTCTGTTGCCTTTAC
ABHD17B	ENSG00000107362_120179.5	TAAAGTGTATTTCGCATT
ABHD17B	ENSG00000107362_120180.6	GTACTGTCCCTATACTT
ABHD17B	ENSG00000107362_120181.7	AATTATTAATACTGGAG
ABHD17B	ENSG00000107362_120182.8	ACCTGTGGAGCCTCTCT
ABHD17B	ENSG00000107362_120183.9	GCAACGTTCAAACAATGCG
ABHD17B	ENSG00000107362_120184.10	GGAATGCATCAAAACAGT
ABHD17C	ENSG00000136379_120265.1	CCGTTCATCCTGGGGCC
ABHD17C	ENSG00000136379_120266.2	CACCGTGTAGGTGGGCT
ABHD17C	ENSG00000136379_120267.3	CTTGGCGGCGATGCGGCTC
ABHD17C	ENSG00000136379_120268.4	GCCCGGGACAACCGGCT
ABHD17C	ENSG00000136379_120269.5	CACCGCAGCAGCCCGAGGA
ABHD17C	ENSG00000136379_120270.6	AATGACCAACACAGGAG
ABHD17C	ENSG00000136379_120271.7	AGCCGTGGAGCCCCTTT
ABHD17C	ENSG00000136379_120272.8	TACATCGCTAGGCCAT
ABHD17C	ENSG00000136379_120273.9	AGGCCAAGTCTACCGTG
ABHD17C	ENSG00000136379_120274.10	AGAACATTATCCTCTA
ABHD2	ENSG00000140526_21224.1	CTTCACTCCATCAAACA
ABHD2	ENSG00000140526_21225.2	TGCTGTACGTGATCGTC
ABHD2	ENSG00000140526_21226.3	AGTTCGGGAGTCTCCAGCA
ABHD2	ENSG00000140526_21227.4	AACTTCCGGTGCCCATA
ABHD2	ENSG00000140526_21228.5	TTGATCTGGGGGAAAAG
ABHD2	ENSG00000140526_21229.6	AAGAGGTCGAATGTAGAAG
ABHD2	ENSG00000140526_21230.7	CCTTGTATGGGAAGAT
ABHD2	ENSG00000140526_21231.8	GTGAACATGCGTGGCG
ABHD2	ENSG00000140526_21232.9	CTGTGATTGGCAATTCC
ABHD2	ENSG00000140526_21233.10	ACCCAGCTGGTCGTCGT
ABHD3	ENSG00000158201_78533.1	AGCCGAAGAACCCCACC
ABHD3	ENSG00000158201_78534.2	ACGGTCTGGTGCTGGGA
ABHD3	ENSG00000158201_78535.3	GGAGCTCTCCCTCTACC
ABHD3	ENSG00000158201_78536.4	GACAACATCCGCAGGTCCA
ABHD3	ENSG00000158201_78537.5	TGATGAAAGGTCTAAGCA
ABHD3	ENSG00000158201_78538.6	AAGCCCCCGGTGCAGTAC
ABHD3	ENSG00000158201_78539.7	AGGACAGATTTCACTGGAC
ABHD3	ENSG00000158201_78540.8	ATAGTAGGTCTGGTGC
ABHD3	ENSG00000158201_78541.9	CTTGTTCCCGTGAGGCC
ABHD3	ENSG00000158201_78542.10	ATAACAGTACGTGTTATA
ABHD4	ENSG00000100439_44480.1	AGTAGCTGGCTGCCCACG
ABHD4	ENSG00000100439_44481.2	CTGAAGAATGTGGAAGCC
ABHD4	ENSG00000100439_44482.3	GAGGGATACATATCTGGCC
ABHD4	ENSG00000100439_44483.4	CCCCCTCCGGGTCCCTT
ABHD4	ENSG00000100439_44484.5	TGACATCGATAGAGACA
ABHD4	ENSG00000100439_44485.6	CAAAACGACCGCACCCCCT
ABHD4	ENSG00000100439_44486.7	CACACCTTCGATCTGCT
ABHD4	ENSG00000100439_44487.8	GGGTTAGTTGGTCGGAG
ABHD4	ENSG00000100439_44488.9	GTGCAGCGATTCCGGC
ABHD4	ENSG00000100439_44489.10	TCCTAGGACAGATGCCA
ABHD5	ENSG00000011198_108491.1	AACCTGTTCGTATATCTAA
ABHD5	ENSG00000011198_108492.2	ACGTAGGGCACCATGTG
ABHD5	ENSG00000011198_108493.3	TCTTGATCAGCAAGGTC
ABHD5	ENSG00000011198_108494.4	GACGAAGTAGTAGACCC
ABHD5	ENSG00000011198_108495.5	AGGTGGACTCTGCCGACAC
ABHD5	ENSG00000011198_108496.6	GGCTCTGGGCACTGAATTT
ABHD5	ENSG00000011198_108497.7	TCTAGTGCAGCGTTTA
ABHD5	ENSG00000011198_108498.8	CAATCCTTAGGCCAGCTAA
ABHD5	ENSG00000011198_108499.9	TGGAATCCATTGAAGAG
ABHD5	ENSG00000011198_108500.10	AATACTTTCGTTTGAAATC
ABHD6	ENSG00000163686_57306.1	GTTAACATGTTTGTGATTG
ABHD6	ENSG00000163686_57307.2	CCACAAATGCCAGGATT
ABHD6	ENSG00000163686_57308.3	TTCTGTTATTCCTTCCG
ABHD6	ENSG00000163686_57309.4	ATTCTTATCAGTGCTGA
ABHD6	ENSG00000163686_57310.5	ACCAAGTGCAGGTTCTT
ABHD6	ENSG00000163686_57311.6	AATCCGTGGAGCATGAGGA
ABHD6	ENSG00000163686_57312.7	AGCCACATATCCTTGT
ABHD6	ENSG00000163686_57313.8	GTAGGCACCTCCATGGG
ABHD6	ENSG00000163686_57314.9	GCTGGAGACATCCGAT
ABHD6	ENSG00000163686_57315.10	GATGACCTGTCCATAGAT
ABHD8	ENSG00000127220_102185.1	CTGACCGGGGTGACCGA
ABHD8	ENSG00000127220_102186.2	GACTCGACGCTCTCCAG
ABHD8	ENSG00000127220_102187.3	CCGGGCTTGACCTCTACAA
ABHD8	ENSG00000127220_102188.4	TGCTGCGGGTGAAGCATGC
ABHD8	ENSG00000127220_102189.5	GGCTGCATCCGAGGATG
ABHD8	ENSG00000127220_102190.6	CAGTGCAGGACGCAGGT
ABHD8	ENSG00000127220_102191.7	GTCTGGGTACTCATGTGCC
ABHD8	ENSG00000127220_102192.8	TGTCATCCTTCGTACTC
ABHD8	ENSG00000127220_102193.9	ACACACCATGCTGACCG
ABHD8	ENSG00000127220_102194.10	CCGTGGACAAGCAGGAC
ABI1	ENSG00000136754_5230.1	CCACCCGAGTCAGGTTC
ABI1	ENSG00000136754_5231.2	AGGAGGAGATCCCGTC
ABI1	ENSG00000136754_5232.3	CAACTGGAGTACATTGT
ABI1	ENSG00000136754_5233.4	ACAAGAGAAAAGCTTTAG
ABI1	ENSG00000136754_5234.5	CTAGAGATTGGGTTGTAT
ABI1	ENSG00000136754_5235.6	GGCGCTCCATATTCGC
ABI1	ENSG00000136754_5236.7	CCTCTCAGCTTCGGAGAA
ABI1	ENSG00000136754_5237.8	CTTATCAAATAAATGCAT
ABI1	ENSG00000136754_5238.9	CCAAGTCCTCCCATGTC
ABI1	ENSG00000136754_5239.10	TCATTAGGAACTGTTGG
ABI2	ENSG00000138443_179285.1	GAAGAGGAAATCCCGGG
ABI2	ENSG00000138443_179286.2	CTACACAAATCTGGAAC
ABI2	ENSG00000138443_179287.3	ATTCCATCCTTCGTAGC
ABI2	ENSG00000138443_179288.4	ATAGGCAACACTTGCTA
ABI2	ENSG00000138443_179289.5	TAGTTGTTCTCGCAGTAAT
ABI2	ENSG00000138443_179290.6	TAGGCTTTGGTTTCTTCTA
ABI2	ENSG00000138443_179291.7	CAGGACATTGTTGGCCA
ABI2	ENSG00000138443_179292.8	ACATAGGGGGACTAGG
ABI2	ENSG00000138443_179293.9	TAATCATTTGGTACCAC
ABI2	ENSG00000138443_179294.10	GCTCCAGTGTGCGATA
ABI3	ENSG00000108798_29203.1	GCTCGGGAATCCGGGG
ABI3	ENSG00000108798_29204.2	CGCCGAAGGTGTCGGTG
ABI3	ENSG00000108798_29205.3	TCTGCCGTCGGGCACCAC
ABI3	ENSG00000108798_29206.4	CCTGCCCCTTGGGCGTG
ABI3	ENSG00000108798_29207.5	CCGTCGAGGTGTTCCAG
ABI3	ENSG00000108798_29208.6	GAGTTTGAGATCCCCAC
ABI3	ENSG00000108798_29209.7	CGCCTTCCGCTTGTCTG
ABI3	ENSG00000108798_29210.8	CAACCACAGTGCCCTGCTG
ABI3	ENSG00000108798_29211.9	GGCTTCCACCTGCCGCA
ABI3	ENSG00000108798_29212.10	TCTCGAAAGAGCATCA
ABI3BP	ENSG00000154175_153413.1	GGGTGTCTACTTCTCTG
ABI3BP	ENSG00000154175_153414.2	TTGTTCTGTGGTACGGC
ABI3BP	ENSG00000154175_153415.3	GACGCAAGAACTTCAAG
ABI3BP	ENSG00000154175_153416.4	GTTGATGAGGAAACCCC
ABI3BP	ENSG00000154175_153417.5	TCATTGGGACAGTGACT
ABI3BP	ENSG00000154175_153418.6	GGCTCCGGTTGTATCG
ABI3BP	ENSG00000154175_153419.7	AACTGGTTCGAGGATTG
ABI3BP	ENSG00000154175_153420.8	GTATTGATGTGGACTTTG
ABI3BP	ENSG00000154175_153421.9	TGTCCGTTGTGATGTTT
ABI3BP	ENSG00000154175_153422.10	GCTCGAGGTCTGTAAC
ABL1	ENSG00000097007_200869.1	ATGCTACTGGCCGCTGA
ABL1	ENSG00000097007_200870.2	GCGTGATGTAGTTGCTT
ABL1	ENSG00000097007_200871.3	CGGCATTGCGGGACAC
ABL1	ENSG00000097007_200872.4	GGTGTTGAAGCGGCTCT
ABL1	ENSG00000097007_200873.5	GCAAGCTTGGCCTTCTT
ABL1	ENSG00000097007_200874.6	GGAGGGTGTACCATTAC
ABL1	ENSG00000097007_200875.7	TGGGCTTGTTGCGCTTT
ABL1	ENSG00000097007_200876.8	TGCAACGAAAAGGTTG
ABL1	ENSG00000097007_200877.9	TACGGGGAGGTGTACGA
ABL1	ENSG00000097007_200878.10	GGAAGAAGGAATCATCG
ABL2	ENSG00000143322_201759.1	TGCAACGAAGAGATTA
ABL2	ENSG00000143322_201760.2	CTTTGCATCGTCCCTA
ABL2	ENSG00000143322_201761.3	ATAGCCTCATTTAGTGCCT
ABL2	ENSG00000143322_201762.4	GTGTACAAGCTCTGCCA
ABL2	ENSG00000143322_201763.5	CTGCACTGCGTGACAC
ABL2	ENSG00000143322_201764.6	TCCTTGGTTACAACCAGAA
ABL2	ENSG00000143322_201765.7	TGAAGTTCGCTCTAAGAAT
ABL2	ENSG00000143322_201766.8	GAATTCTTCTACCTCCA
ABL2	ENSG00000143322_201767.9	CGAGATGGACAGCTGCCCA
ABL2	ENSG00000143322_201768.10	CCATACGGGAATTTGC
ABLIM1	ENSG00000099204_50029.1	CTAAATCCTTGTAATCC
ABLIM1	ENSG00000099204_50030.2	TCGGGATGCCAAACGG
ABLIM1	ENSG00000099204_50031.3	GACTACCAGCGGATGTA
ABLIM1	ENSG00000099204_50032.4	GGATCGGATGATCCAT
ABLIM1	ENSG00000099204_50033.5	GCTCATAGGTAATAAGATC
ABLIM1	ENSG00000099204_50034.6	AGCCAGGAATACTGGAGCC
ABLIM1	ENSG00000099204_50035.7	AATGACAGGCTTCTCTGAT
ABLIM1	ENSG00000099204_50036.8	GACCCTCATCACACCAT
ABLIM1	ENSG00000099204_50037.9	GAGTAGGAGACAAAGTCCT
ABLIM1	ENSG00000099204_50038.10	GGCTATGATGACAAAC
ABLIM2	ENSG00000163995_7284.1	CACAGGATCGCCGTGCT
ABLIM2	ENSG00000163995_7285.2	AGGGCGGCTTCTTCGTG
ABLIM2	ENSG00000163995_7286.3	GACTACCAGAGGCTCTA
ABLIM2	ENSG00000163995_7287.4	GCTGCTTGTCGACACGC
ABLIM2	ENSG00000163995_7288.5	AGTGACCTTCAACGGGA
ABLIM2	ENSG00000163995_7289.6	CTGCGACCAGTTCATTGA
ABLIM2	ENSG00000163995_7290.7	CAGCGCGCACCTGTCCC
ABLIM2	ENSG00000163995_7291.8	GCACACACGAAGCAGTCG
ABLIM2	ENSG00000163995_7292.9	AAGTGTTCCCTGCCCGTAT
ABLIM2	ENSG00000163995_7293.10	ACAGAAATGATGCTCTCTG
ABLIM3	ENSG00000173210_40703.1	AATCCTTACAATCCACG
ABLIM3	ENSG00000173210_40704.2	GACTACCAGCAACTCTA
ABLIM3	ENSG00000173210_40705.3	CTGTGGAGACACCTGCAAA
ABLIM3	ENSG00000173210_40706.4	CTGCACACGAAGCACTT
ABLIM3	ENSG00000173210_40707.5	GTCACCTTGTCTCCAAT
ABLIM3	ENSG00000173210_40708.6	GCTTCTTCTTCAAGAACC
ABLIM3	ENSG00000173210_40709.7	GTCCACGAATCTTGAT
ABLIM3	ENSG00000173210_40710.8	CAGCGTCATCCTCACCG
ABLIM3	ENSG00000173210_40711.9	CACGGCCAGTCACTCC
ABLIM3	ENSG00000173210_40712.10	GCACCCCATCTGCAAAC
ABR	ENSG00000159842_27295.1	AGCTGCGGGGACATGGT
ABR	ENSG00000159842_27296.2	CTGGTTCTCTCGGGGTTCT
ABR	ENSG00000159842_27297.3	TGGCCTTCAGGGGTTTCAT
ABR	ENSG00000159842_27298.4	TTAATGTAGATCTCTTCGC
ABR	ENSG00000159842_27299.5	CTTTGTACACACCGAGC
ABR	ENSG00000159842_27300.6	TTGCACCTTGGGGCAC
ABR	ENSG00000159842_27301.7	ACCATCTTCTACAAGATCC
ABR	ENSG00000159842_27302.8	AGGACATCGACCCCCGC
ABR	ENSG00000159842_27303.9	GGACGGACGAGTACGA
ABR	ENSG00000159842_27304.10	TCTCCCCGACTCCACCTGA
ABRA	ENSG00000174429_2069.1	GTCATCAGCTTGGCCCG
ABRA	ENSG00000174429_2070.2	CTCCGGGCGAAAAGGAAAG
ABRA	ENSG00000174429_2071.3	GCTGTGCGTATCTTCCGGA
ABRA	ENSG00000174429_2072.4	GAGCCTACAGGCTGGCTGC
ABRA	ENSG00000174429_2073.5	TAGGGGGTGTGATTGGTTT
ABRA	ENSG00000174429_2074.6	TCCACCCGCCTACACAA
ABRA	ENSG00000174429_2075.7	CCCAGTGGGCAACTTGAAA
ABRA	ENSG00000174429_2076.8	GAACCAAAACTGCTGAA
ABRA	ENSG00000174429_2077.9	GCTCGCCACAGACGAGA
ABRA	ENSG00000174429_2078.10	AAGAGTTTGATTACGAGC
ABRACL	ENSG00000146386_82129.1	AGGTTAACCTCTTAGTGG
ABRACL	ENSG00000146386_82130.2	AGATAGAGTATTTCTCC
ABRACL	ENSG00000146386_82131.3	GAAAGTTAAGCGTGAAATT
ABRACL	ENSG00000146386_82132.4	GTTGGCACATTTATCATCA
ABRACL	ENSG00000146386_82133.5	CCAGTCTCACCTGTTCCA
ABRACL	ENSG00000146386_82134.6	ATGAATTTCCTCCACTAAG
ABRACL	ENSG00000146386_82135.7	TGGAGGAAATTCATCGTTT
ABRACL	ENSG00000146386_82136.8	GAAGATTGTAACATATCC
ABRACL	ENSG00000146386_82137.9	TTAAGCGTGAAATTTG
ABRACL	ENSG00000146386_82138.10	AAAGTTAAGCGTGAAATTT
ABT1	ENSG00000146109_74781.1	CGGCTCTTGCTCCGTTG
ABT1	ENSG00000146109_74782.2	AACAGACACTAGATGCGG
ABT1	ENSG00000146109_74783.3	AATCCGAAGAAGCGGCCTG
ABT1	ENSG00000146109_74784.4	TGCAGGGGCCGGAAGCG
ABT1	ENSG00000146109_74785.5	ACGCGTCCGACCTCGCCAT
ABT1	ENSG00000146109_74786.6	ACTGGCCGCCACGCGCT
ABT1	ENSG00000146109_74787.7	TTCGTGAGACGCAAGAAGA
ABT1	ENSG00000146109_74788.8	CGCCTGCGGGCACCCAT
ABT1	ENSG00000146109_74789.9	CTGCCGGAGGAAAAAAG
ABT1	ENSG00000146109_74790.10	GTGTAGTCCTTGGTGT
ABTB1	ENSG00000114626_155384.1	GAAGGGCAAGAGTGTCG
ABTB1	ENSG00000114626_155385.2	TTGAAGCCGTCAGGACA
ABTB1	ENSG00000114626_155386.3	CTCTACGCCAATGTCC
ABTB1	ENSG00000114626_155387.4	CAGGGCCCCAAAGGCCACG
ABTB1	ENSG00000114626_155388.5	CACCTTCACACACGTGCC
ABTB1	ENSG00000114626_155389.6	CGCCATGTCCTCCCGGAGG
ABTB1	ENSG00000114626_155390.7	GCCAAGCAATGCCAGCTGT
ABTB1	ENSG00000114626_155391.8	CAGCTGGCGAACAGGTCGC
ABTB1	ENSG00000114626_155392.9	GAAGTGGTCATCCAGCA
ABTB1	ENSG00000114626_155393.10	CCATGCAGGGTGACGGC
ABTB2	ENSG00000166016_152770.1	CGGCCTCACCTTCTCAG
ABTB2	ENSG00000166016_152771.2	GGACCCGCCGTTGTAG
ABTB2	ENSG00000166016_152772.3	CAAGACGCCCCAGAGCT
ABTB2	ENSG00000166016_152773.4	CAGATGAGATGCTCATA
ABTB2	ENSG00000166016_152774.5	GGTTCGGAGCTCCAGCT
ABTB2	ENSG00000166016_152775.6	TGGATGCGCACGGAGATTC
ABTB2	ENSG00000166016_152776.7	CGCATCCACTCCATGAG
ABTB2	ENSG00000166016_152777.8	TGCCATGCACCACATGC
ABTB2	ENSG00000166016_152778.9	GTGGAGGAGATCCGGGCCA
ABTB2	ENSG00000166016_152779.10	GATGTCGCCGCTGTCCA
AC000003.2	ENSG00000264194_16790.1	CAAGTTCTCATTGTTGAGA
AC000003.2	ENSG00000264194_16791.2	GACCTGATCCATGACAA
AC000003.2	ENSG00000264194_16792.3	TAGCCACCATTCTCTCA
AC000003.2	ENSG00000264194_16793.4	GTTCTCCCCAAACTCGG
AC000003.2	ENSG00000264194_16794.5	CATCCACACACATGCAAGA
AC000003.2	ENSG00000264194_16795.6	GGTGCCTTGGTGCTCGATG
AC000003.2	ENSG00000264194_16796.7	ATTATCTAACTTGGTTCTG
AC000003.2	ENSG00000264194_16797.8	CCCCCGTAGTCCCAAAGCC
AC000003.2	ENSG00000264194_16798.9	ATCCTGGCTTTGGGACTA
AC000003.2	ENSG00000264194_16799.10	CCAGGATCTTCGTGGGA
AC002310.13	ENSG00000260869_135457.1	GCCCCGTTTGGGTCCCG
AC002310.13	ENSG00000260869_135458.2	TGGCCGTGTACTTCTGC
AC002310.13	ENSG00000260869_135459.3	AGAGCGCTCAGGTGGCCGT
AC002310.13	ENSG00000260869_135460.4	AGTCGGAGGCAGCAAGC
AC002310.13	ENSG00000260869_135461.5	AAGGCCGAACTGTGGGATC
AC002310.13	ENSG00000260869_135462.6	TCCGGCCCCGTTTGGGTCC
AC002310.13	ENSG00000260869_135463.7	GGGCCGGACCCGAGTGGA
AC002310.13	ENSG00000260869_135464.8	CCGGCGCTCATCTCCT
AC002310.13	ENSG00000260869_135465.9	CAAGCCGGCGCTCATCTCC
AC002310.13	ENSG00000260869_135466.10	GCGCTCATCTCCTGGGTGG
AC002365.1	ENSG00000234469_129335.1	CCCTTACCACCATAGGA
AC002365.1	ENSG00000234469_129336.2	AGGCCCGTGGACGTAG
AC002365.1	ENSG00000234469_129337.3	TTACCGATACAGCTACC
AC002365.1	ENSG00000234469_129338.4	ACACCTCGCTCTACCCCCC
AC002365.1	ENSG00000234469_129339.5	TTGCAGAACCAGACCATGG
AC002365.1	ENSG00000234469_129340.6	ACTCTAAATATTCCCACGC
AC002365.1	ENSG00000234469_129341.7	TAGGAAGCGTTGAGCCA
AC002365.1	ENSG00000234469_129342.8	CCGTCATAAACTCACAG
AC002365.1	ENSG00000234469_129343.9	TCCATGAGAATGTTTGAGG
AC002365.1	ENSG00000234469_129344.10	GAATTCTCAACATTGCTGC
AC002398.9	ENSG00000188223_147890.1	GAGCGAGTGTCCAATG
AC002398.9	ENSG00000188223_147891.2	TGCCGGAAGTACTACC
AC002398.9	ENSG00000188223_147892.3	TTGACCAACCAGAGAAA
AC002398.9	ENSG00000188223_147893.4	TGTAGGCTGGGACAAGGA
AC002398.9	ENSG00000188223_147894.5	GTTCAATTTCTCCTCAT
AC002398.9	ENSG00000188223_147895.6	GTAGTACTTCCGGCAC
AC002398.9	ENSG00000188223_147896.7	GAGAAATTGAACCTGTGC
AC002398.9	ENSG00000188223_147897.8	ACCAACCAGAGAAAAGGC
AC002398.9	ENSG00000188223_147898.9	GTTGGTCAACATCTTC
AC002398.9	ENSG00000188223_147899.10	TTCTGTGTAGGCTGGGACA
AC002451.1	ENSG00000269449_133064.1	CAAAAACATCCCCCAAAAG
AC002451.1	ENSG00000269449_133065.2	TGCCATGGCACTCCAGCTT
AC002451.1	ENSG00000269449_133066.3	TGCCATGGCACTCCAGCT
AC002451.1	ENSG00000269449_133067.4	AGCCGAGATCGTGCCA
AC002451.1	ENSG00000269449_133068.5	GAGTGCCATGGCACGATCT
AC002451.1	ENSG00000269449_133069.6	GTGGGTGGATCATTTG
AC002451.1	ENSG00000269449_133070.7	GGTGGATCATTTGAGGTC
AC002451.1	ENSG00000269449_133071.8	AAAATCGCTTGAACCTGGG
AC002451.1	ENSG00000269449_133072.9	GAAAATCGCTTGAACCT
AC002451.1	ENSG00000269449_133073.10	GTGCCTGCCACCATGCC
AC002472.1	ENSG00000269103_126002.1	TTAGCCAGGCGCGATGGC
AC002472.1	ENSG00000269103_126003.2	GTGCCCGCCATCGCGCC
AC002472.1	ENSG00000269103_126004.3	AGAATGGCATGAACCCCGG
AC002472.1	ENSG00000269103_126005.4	GCATGAACCCCGGAGG
AC002472.1	ENSG00000269103_126006.5	CTACTCGGGAGGCTGAAGC
AC002472.1	ENSG00000269103_126007.6	GGAGGCTGAAGCAGGAGAA
AC002472.1	ENSG00000269103_126008.7	CTTCAGCCTCCCGAGTAGC
AC002472.1	ENSG00000269103_126009.8	GAGAATGGCATGAACCC
AC002472.1	ENSG00000269103_126010.9	AGTCTTGCTCTGTCGCCC
AC002472.1	ENSG00000269103_126011.10	TGCCACTGCACTCCAGCCT
AC002472.13	ENSG00000187905_21474.1	GAGTCCCAATTGGCCTC
AC002472.13	ENSG00000187905_21475.2	GGTTCCTGTGAGAGGTCTG
AC002472.13	ENSG00000187905_21476.3	TGGCCTGTGGGCGTCTTTC
AC002472.13	ENSG00000187905_21477.4	GAGATGGGCACAACACTAT
AC002472.13	ENSG00000187905_21478.5	GTCCAGCCGCTTGACATA
AC002472.13	ENSG00000187905_21479.6	ACCAGTTCTCCAAGCCCAT
AC002472.13	ENSG00000187905_21480.7	AGATGTCTAGAACTTTA
AC002472.13	ENSG00000187905_21481.8	GAGACACTTGGACCAGCCC
AC002472.13	ENSG00000187905_21482.9	GACCTGTCGGAGAACCAGC
AC002472.13	ENSG00000187905_21483.10	TGAGCTGGAATCACCTCCG
AC002985.3	ENSG00000268193_15814.1	GAAGCAGCCAGGCTGGCCA
AC002985.3	ENSG00000268193_15815.2	CACTGACGAGAGGGCTCGG
AC002985.3	ENSG00000268193_15816.3	GCCCCACAGAGCGCGAG
AC002985.3	ENSG00000268193_15817.4	GGCATCAGCGCTCTGGCTG
AC002985.3	ENSG00000268193_15818.5	GAGGCTCAGGCAGCTTCAG
AC002985.3	ENSG00000268193_15819.6	CCAGGGAGAAATCTCAGGA
AC002985.3	ENSG00000268193_15820.7	CTGGCCAGGGAGAAATCTC
AC002985.3	ENSG00000268193_15821.8	GAGAAATCTCAGGATGGCG
AC002985.3	ENSG00000268193_15822.9	CCATCCTGAGATTTCTCCC
AC002985.3	ENSG00000268193_15823.10	GCACTGACGAGAGGGCTCG
AC003002.4	ENSG00000268133_199914.1	GAGTGGGGGCATCTCGATG
AC003002.4	ENSG00000268133_199915.2	AGGAGGCACCTTCACAGCA
AC003002.4	ENSG00000268133_199916.3	ACCTTCTGGCTGGACAGAC
AC003002.4	ENSG00000268133_199917.4	AGATGCCCCCACTCCTCCT
AC003002.4	ENSG00000268133_199918.5	AGATGCCCCCACTCCTCC
AC003002.4	ENSG00000268133_199919.6	CCCTGTCTGTCCAGCCAGA
AC003002.4	ENSG00000268133_199920.7	TCCACCCTAGTGAGACATG
AC003002.4	ENSG00000268133_199921.8	TGGGCCACATGTCTCACTA
AC003002.4	ENSG00000268133_199922.9	ATGTGATGCTGGAGAATT
AC003002.4	ENSG00000268133_199923.10	GTGGGCCACATGTCTCACT
AC003002.6	ENSG00000269533_38785.1	TCCATTTCTGCCATCGCCA
AC003002.6	ENSG00000269533_38786.2	AATTCCCCACTCCTCCT
AC003002.6	ENSG00000269533_38787.3	TGTGGTCTTTGAGGACG
AC003002.6	ENSG00000269533_38788.4	CATCACATCGCTGTGC
AC003002.6	ENSG00000269533_38789.5	GAGTGGGGGCACCTTGATG
AC003002.6	ENSG00000269533_38790.6	CTTGGCTGTACGCTTG
AC003002.6	ENSG00000269533_38791.7	CCAGCTTTGTCCACCCAGA
AC003002.6	ENSG00000269533_38792.8	CAGTGGCAGCAATGCTTA
AC003002.6	ENSG00000269533_38793.9	GTCCATTTCTGCCATCGCC
AC003002.6	ENSG00000269533_38794.10	CAATCTCTGAGCCTCATCA
AC003005.4	ENSG00000268107_84109.1	AGCGGGGTCCCTCAGGG
AC003005.4	ENSG00000268107_84110.2	TAGACAGCCACATCCTCAA
AC003005.4	ENSG00000268107_84111.3	CAATCTCCATTCCTCCT
AC003005.4	ENSG00000268107_84112.4	CATCACATTGCGGTAG
AC003005.4	ENSG00000268107_84113.5	ATTGCTTGATGACGCTCAG
AC003005.4	ENSG00000268107_84114.6	GCTGTCTACTTCTCCCAGG
AC003005.4	ENSG00000268107_84115.7	TTCTCCAGCATCACATTG
AC003005.4	ENSG00000268107_84116.8	CTGGAGAACTTTACACTTC
AC003005.4	ENSG00000268107_84117.9	TGGCTGTCTACTTCTCCC
AC003005.4	ENSG00000268107_84118.10	CAATCTCCATTCCTCC
AC003006.7	ENSG00000269026_143522.1	GCGGCAGTCGCGCTGA
AC003006.7	ENSG00000269026_143523.2	TCCAATGTGTCCTGAGT
AC003006.7	ENSG00000269026_143524.3	CAGACCCTTTCTATACAAC
AC003006.7	ENSG00000269026_143525.4	GGAGATATCTTACACCA
AC003006.7	ENSG00000269026_143526.5	GAGACTCCATTCCTCCT
AC003006.7	ENSG00000269026_143527.6	CTGCTTCTGGTCTTGATGA
AC003006.7	ENSG00000269026_143528.7	AGAAGATATAAGTGTC
AC003006.7	ENSG00000269026_143529.8	TACAGAAGCAATGCCAA
AC003006.7	ENSG00000269026_143530.9	GCAGTCGCGCTGAGGGACT
AC003006.7	ENSG00000269026_143531.10	CATCACGTCATGATAA
AC003043.1	ENSG00000268413_11276.1	GCCAGGATGGGAATTAG
AC003101.1	ENSG00000228768_107953.1	ACCTGGCCTCGGTAGC
AC003101.1	ENSG00000228768_107954.2	CTGACGGCTACTCACTT
AC003101.1	ENSG00000228768_107955.3	CCCCCAAAATTCATCAG
AC003101.1	ENSG00000228768_107956.4	CCCCAAGATATGTTGGC
AC003101.1	ENSG00000228768_107957.5	CGAGCTGTAGAGTAAGG
AC003101.1	ENSG00000228768_107958.6	CCAGGCAGGGCTGCTGTTG
AC003101.1	ENSG00000228768_107959.7	TCCCGGTCCTCCCAGAA
AC003101.1	ENSG00000228768_107960.8	TGGGTGAGAGGCAGGTTGC
AC003101.1	ENSG00000228768_107961.9	TCCAAAATAAGAGTGAATG
AC003101.1	ENSG00000228768_107962.10	CTCGCTGGTAAGCCCTGG
AC003102.1	ENSG00000214921_53878.1	AAGTGGTAGAAAAGAGAGG
AC003102.1	ENSG00000214921_53879.2	TGGTAGAAAAGAGAGGAGG
AC003102.1	ENSG00000214921_53880.3	AGGAAACAGAATCAGGAAG
AC003102.1	ENSG00000214921_53881.4	AAAAGAGAGGAGGTGGCT
AC003102.1	ENSG00000214921_53882.5	GAAGTGGTAGAAAAGAG
AC003102.1	ENSG00000214921_53883.6	AAAAGAGAGGAGGTGGC
AC003102.1	ENSG00000214921_53884.7	AGGAGGTGGCTGGGCGCAG
AC003102.1	ENSG00000214921_53885.8	CACTTTGGGAGGCCAAGTT
AC003102.1	ENSG00000214921_53886.9	CACTTTGGGAGGCCAAGT
AC003102.1	ENSG00000214921_53887.10	TTTGTAATCCCAGCACTTT
AC004017.1	ENSG00000268948_194098.1	AGAATGGCGTGAACCTGAG
AC004017.1	ENSG00000268948_194099.2	TAGTCCCAGCTACTGGGA
AC004017.1	ENSG00000268948_194100.3	CAGTGCAATGGCACGATCT
AC004017.1	ENSG00000268948_194101.4	GCGTGAACCTGAGAGG
AC004017.1	ENSG00000268948_194102.5	CGCCTGTAGTCCCAGCTAC
AC004017.1	ENSG00000268948_194103.6	CTACTGGGAAGGCTGAGGC
AC004017.1	ENSG00000268948_194104.7	CCTCAGCCTTCCCAGTAGC
AC004017.1	ENSG00000268948_194105.8	GCGCCCGCCACCATGCC
AC004017.1	ENSG00000268948_194106.9	GAAGGCTGAGGCAGGAGAA
AC004017.1	ENSG00000268948_194107.10	GAGTCTCGCTCTGTCACCC
AC004076.7	ENSG00000268533_182512.1	TCCATTTCTGCCATCGCCA
AC004076.7	ENSG00000268533_182513.2	GTCCATTTCTGCCATCGCC
AC004076.7	ENSG00000268533_182514.3	AGCCCAGGGGTTCCAGG
AC004076.7	ENSG00000268533_182515.4	CCACTGTACTCCAGCTTA
AC004076.7	ENSG00000268533_182516.5	ATCATAGCTCACTGCCACC
AC004076.7	ENSG00000268533_182517.6	CCACTGTACTCCAGCTTAG
AC004076.7	ENSG00000268533_182518.7	ATCAACTCAGTATGCCAC
AC004076.7	ENSG00000268533_182519.8	ATCACGACCCTCATTCTTT
AC004076.7	ENSG00000268533_182520.9	GAGGATCACTTGAGCCCAG
AC004076.7	ENSG00000268533_182521.10	GAGGATCACTTGAGCCCA
AC004076.9	ENSG00000268163_52397.1	TTCGTGTACTTCTCCCAGG
AC004076.9	ENSG00000268163_52398.2	CTGGAGAACTTTGCACTTA
AC004076.9	ENSG00000268163_52399.3	TCTGTTGCTGTGATTGTGT
AC004076.9	ENSG00000268163_52400.4	AACTCAGAAGTAATTG
AC004076.9	ENSG00000268163_52401.5	GCTTCCTGGGAAGGTCTGC
AC004076.9	ENSG00000268163_52402.6	TACTGTCCTGATACTCA
AC004076.9	ENSG00000268163_52403.7	TGTTCGTGTACTTCTCCC
AC004076.9	ENSG00000268163_52404.8	GAGTGGGTGCTCCTTGATG
AC004076.9	ENSG00000268163_52405.9	TGGCTCTGGCTTCCTGGGA
AC004076.9	ENSG00000268163_52406.10	AGCCACACACACCATCA
AC004381.6	ENSG00000005189_65076.1	GGACCGAGAGACACCCC
AC004381.6	ENSG00000005189_65077.2	CCCCGACCAGCTTATTT
AC004381.6	ENSG00000005189_65078.3	CTAGAAAATCAGATGATGG
AC004381.6	ENSG00000005189_65079.4	CTGAAGTATGCAGTTCT
AC004381.6	ENSG00000005189_65080.5	ATGCCTTCTGACAAAGG
AC004381.6	ENSG00000005189_65081.6	TATGGCTCTAAGAAAGT
AC004381.6	ENSG00000005189_65082.7	GGATCATCCTGAAGGTTGA
AC004381.6	ENSG00000005189_65083.8	CTGTGTTATGGATGAAC
AC004381.6	ENSG00000005189_65084.9	CTATAGAACCATTACATT
AC004381.6	ENSG00000005189_65085.10	CTCTCTCCCCTTGGATGTG
AC004466.1	ENSG00000268069_138566.1	AGGGGCCACTGTCTGGT
AC004466.1	ENSG00000268069_138567.2	GTGAGCACCCCCCAGTG
AC004466.1	ENSG00000268069_138568.3	GTGACCTGCTGTTGGTC
AC004466.1	ENSG00000268069_138569.4	ATTCCTGTGAGTGACCC
AC004466.1	ENSG00000268069_138570.5	TGCACAGTAAGTGTGGAGA
AC004466.1	ENSG00000268069_138571.6	CTCTCTGGAGGCCGTGATC
AC004466.1	ENSG00000268069_138572.7	TTTCCAGCCTTCTTCTGAA
AC004466.1	ENSG00000268069_138573.8	TGGGTCCCTGAGAGACTGG
AC004466.1	ENSG00000268069_138574.9	GAGGCCAGTCCCTACCTTG
AC004466.1	ENSG00000268069_138575.10	AGGCCAGTCCCTACCTTGA
AC004528.1	ENSG00000269169_113430.1	TAATCCCAGCTACTCGGG
AC004528.1	ENSG00000269169_113431.2	CTACTCGGGAGGCTGAGGC
AC004528.1	ENSG00000269169_113432.3	CCTCAGCCTCCCGAGTAGC
AC004817.1	ENSG00000267901_155904.1	CCAAAACAACTTGCTGCT
AC004817.1	ENSG00000267901_155905.2	GACTTCATGACGCAAGG
AC004817.1	ENSG00000267901_155906.3	TGGCGCGCTCCCTGGTTGT
AC004817.1	ENSG00000267901_155907.4	CCTGGGTGGCGAATGCTCT
AC004817.1	ENSG00000267901_155908.5	AGAAAGGCATGAAACG
AC004817.1	ENSG00000267901_155909.6	CCACTGAGTGACATTACCA
AC004817.1	ENSG00000267901_155910.7	CCCAGCAGCAAGTTGTTT
AC004817.1	ENSG00000267901_155911.8	TCCGATGGTGGAGCAGA
AC004817.1	ENSG00000267901_155912.9	CCAAAACAACTTGCTGC
AC004817.1	ENSG00000267901_155913.10	GACTTCATGACGCAAG
AC004824.2	ENSG00000269468_184835.1	AGACGGGATTTCGCCATGC
AC004824.2	ENSG00000269468_184836.2	GGATTTCGCCATGCTGGCC
AC004824.2	ENSG00000269468_184837.3	TAATCCAGCTACTCAGG
AC004824.2	ENSG00000269468_184838.4	TGAGCCACTGTGCCCGGCC
AC004824.2	ENSG00000269468_184839.5	CGCATGCCACCACACC
AC004824.2	ENSG00000269468_184840.6	AGACCAGCCTGGCCAGCA
AC004824.2	ENSG00000269468_184841.7	AGATGGGATTTCACCATGT
AC004824.2	ENSG00000269468_184842.8	GTGTGAGCCACTGTGCC
AC004824.2	ENSG00000269468_184843.9	CCTCGGCCTCCTGAGTAGC
AC004824.2	ENSG00000269468_184844.10	AAGTTCGAGACCAGCC
AC004899.1	ENSG00000267970_69555.1	AAGGCGATCGGTGATGTCC
AC004899.1	ENSG00000267970_69556.2	TCGTCCTGGGGGTCCCAG
AC004899.1	ENSG00000267970_69557.3	CGCTGCTCTTTGACCTTGC
AC004899.1	ENSG00000267970_69558.4	GAAGCGGAAAAGCAAGCGG
AC004899.1	ENSG00000267970_69559.5	TTGCTCCCTGACCGGCTG
AC004899.1	ENSG00000267970_69560.6	CGGGCACAGAGCGGCCTTG
AC004899.1	ENSG00000267970_69561.7	AGCAGCGCTGCCAGCAGAG
AC004899.1	ENSG00000267970_69562.8	CTGCTCTTTGACCTTGCA
AC004899.1	ENSG00000267970_69563.9	CAAGCGGCGGTCGAGCT
AC004899.1	ENSG00000267970_69564.10	CAAGCGGCGGTCGAGC
AC005003.1	ENSG00000213888_183022.1	GTGTACAACTCTAGCG
AC005003.1	ENSG00000213888_183023.2	ACAAAGCGCCGAGGCCTGG
[truncated: 216,703+ more rows]

## Sheet: sgRNA sequences top100 libr
Gene ID	sgRNA	Sequence
[truncated: 12,436 more rows]
